# Supplementary material for: Weighted gene correlation network analysis reveals novel biomarkers associated with mesenchymal stromal cell differentiation in early phase
Source: PeerJ. 2020 Apr 3;8:e8907. doi: 10.7717/peerj.8907 (PMC7134052; doi:10.7717/peerj.8907)
Supplement: Supplemental Information 1 — The column named ’Description’ includes pathways and biological processes. The column named ’Hits’ includes genes involved in each term. [file peerj-08-8907-s001.xlsx]

## Sheet: S1
_MEMBER_hits	_LogP_hits	GO	_PATTERN_	_RANK_	GiniIndex	Category	CategoryID	Description	LogP	Enrichment	Z-score	#TotalGeneInLibrary	#GeneInGO	#GeneInHitList	#GeneInGOAndHitList	%InGO	STDV %InGO	GeneID	Hits	Log(q-value)	EvidenceCutoff	GROUP_ID	FirstInGroupByEnrichment	FirstInGroupByLogP	BestLogPInGroup	BestEnrichmentInGroup	URL
1	-66.1471	R-HSA-1640170	M1	1	0	Reactome Gene Sets	6	Cell Cycle	-66.1471	7.27688	25.8352	24155	643	604	117	19.3709	1.60806	332|672|699|701|891|993|994|1063|1163|1719|2237|2305|3014|3015|3320|3978|4000|4085|4171|4172|4173|4174|4175|4176|4927|5111|5422|5424|5426|5427|5515|5557|5578|5701|5708|5718|5932|5982|5983|5984|5985|6117|6241|7027|7112|7283|7298|7468|7534|7846|8318|8364|8379|8815|9088|9126|9156|9184|9232|9493|9631|9735|9738|9793|9918|10051|10112|10197|10376|10381|10383|10592|10714|10733|10762|10971|11116|11130|113…	BIRC5|BRCA1|BUB1|BUB1B|CCNB1|CDC25A|CDC25B|CENPF|CKS1B|DHFR|FEN1|FOXM1|H2AX|H2AZ1|HSP90AA1|LIG1|LMNA|MAD2L1|MCM2|MCM3|MCM4|MCM5|MCM6|MCM7|NUP88|PCNA|POLA1|POLD1|POLE|POLE2|PPP2CA|PRIM1|PRKCA|PSMC2|PSMD2|PSMD12|RBBP8|RFC2|RFC3|RFC4|RFC5|RPA1|RRM2|TFDP1|TMPO|TUBG1|TYMS|NSD2|YWHAZ|TUBA1A|CDC45|H4C3|MAD1L1|BANF1|PKMYT1|SMC3|EXO1|BUB3|PTTG1|KIF23|NUP155|KNTC1|CCP110|CKAP5|NCAPD2|SMC4|KIF20A|PSME3|TUBA…	-61.8296	0	1	1	1	-66.1471	9.58135
1	-63.3032	R-HSA-69278	M1	1	0	Reactome Gene Sets	6	Cell Cycle, Mitotic	-63.3032	7.87941	25.8427	24155	538	604	106	17.5497	1.54779	332|699|701|891|993|994|1063|1163|1719|2237|2305|3014|3015|3320|3978|4000|4085|4171|4172|4173|4174|4175|4176|4927|5111|5422|5424|5426|5427|5515|5557|5578|5701|5708|5718|5982|5983|5984|5985|6117|6241|7027|7112|7283|7298|7846|8318|8364|8379|8815|9088|9126|9184|9232|9493|9631|9735|9738|9793|9918|10051|10112|10197|10376|10381|10383|10592|10714|10733|10762|11116|11130|22822|22974|22995|23165|23310|235…	BIRC5|BUB1|BUB1B|CCNB1|CDC25A|CDC25B|CENPF|CKS1B|DHFR|FEN1|FOXM1|H2AX|H2AZ1|HSP90AA1|LIG1|LMNA|MAD2L1|MCM2|MCM3|MCM4|MCM5|MCM6|MCM7|NUP88|PCNA|POLA1|POLD1|POLE|POLE2|PPP2CA|PRIM1|PRKCA|PSMC2|PSMD2|PSMD12|RFC2|RFC3|RFC4|RFC5|RPA1|RRM2|TFDP1|TMPO|TUBG1|TYMS|TUBA1A|CDC45|H4C3|MAD1L1|BANF1|PKMYT1|SMC3|BUB3|PTTG1|KIF23|NUP155|KNTC1|CCP110|CKAP5|NCAPD2|SMC4|KIF20A|PSME3|TUBA1B|TUBB3|TUBB4B|SMC2|POLD3|P…	-59.2866	0	1	0	0	-66.1471	9.58135
1	-36.2501	R-HSA-68886	M1	1	0	Reactome Gene Sets	6	M Phase	-36.2501	6.88465	18.8845	24155	395	604	68	11.2583	1.28612	332|699|701|891|1063|3014|3015|3320|4000|4085|4927|5515|5578|5701|5708|5718|7112|7283|7846|8364|8379|8815|9126|9184|9232|9493|9631|9735|9738|9793|9918|10051|10112|10197|10376|10381|10383|10592|10733|10762|11116|11130|22995|23165|23310|23511|23636|29781|54821|54908|55055|55706|55839|57405|64105|64151|64946|79019|79682|79980|84790|93323|94239|95681|140609|151648|220134|440145	BIRC5|BUB1|BUB1B|CCNB1|CENPF|H2AX|H2AZ1|HSP90AA1|LMNA|MAD2L1|NUP88|PPP2CA|PRKCA|PSMC2|PSMD2|PSMD12|TMPO|TUBG1|TUBA1A|H4C3|MAD1L1|BANF1|SMC3|BUB3|PTTG1|KIF23|NUP155|KNTC1|CCP110|CKAP5|NCAPD2|SMC4|KIF20A|PSME3|TUBA1B|TUBB3|TUBB4B|SMC2|PLK4|NUP50|FGFR1OP|ZWINT|CEP152|NUP205|NCAPD3|NUP188|NUP62|NCAPH2|ERCC6L|SPDL1|ZWILCH|NDC1|CENPN|SPC25|CENPK|NCAPG|CENPH|CENPM|CENPU|DSN1|TUBA1C|HAUS8|H2AZ2|CEP41|NEK…	-32.4097	0	1	0	0	-66.1471	9.58135
1	-27.0588	R-HSA-68877	M1	1	0	Reactome Gene Sets	6	Mitotic Prometaphase	-27.0588	8.59822	17.2797	24155	200	604	43	7.11921	1.04631	332|699|701|891|1063|3320|4085|5515|7283|7846|8379|9126|9184|9735|9738|9793|9918|10051|10376|10381|10383|10592|10733|11116|11130|22995|54821|54908|55055|55839|57405|64105|64151|64946|79019|79682|79980|84790|93323|95681|151648|220134|440145	BIRC5|BUB1|BUB1B|CCNB1|CENPF|HSP90AA1|MAD2L1|PPP2CA|TUBG1|TUBA1A|MAD1L1|SMC3|BUB3|KNTC1|CCP110|CKAP5|NCAPD2|SMC4|TUBA1B|TUBB3|TUBB4B|SMC2|PLK4|FGFR1OP|ZWINT|CEP152|ERCC6L|SPDL1|ZWILCH|CENPN|SPC25|CENPK|NCAPG|CENPH|CENPM|CENPU|DSN1|TUBA1C|HAUS8|CEP41|SGO1|SKA1|MZT1	-23.7412	0	1	0	0	-66.1471	9.58135
1	-20.8577	R-HSA-68882	M1	1	0	Reactome Gene Sets	6	Mitotic Anaphase	-20.8577	7.36166	14.504	24155	201	604	37	6.12583	0.975746	332|699|701|1063|4000|4085|5515|5701|5708|5718|7112|7846|8379|8815|9126|9184|9232|9735|9793|10197|10376|10381|10383|11130|54821|54908|55055|55839|57405|64105|64946|79019|79682|79980|84790|151648|220134	BIRC5|BUB1|BUB1B|CENPF|LMNA|MAD2L1|PPP2CA|PSMC2|PSMD2|PSMD12|TMPO|TUBA1A|MAD1L1|BANF1|SMC3|BUB3|PTTG1|KNTC1|CKAP5|PSME3|TUBA1B|TUBB3|TUBB4B|ZWINT|ERCC6L|SPDL1|ZWILCH|CENPN|SPC25|CENPK|CENPH|CENPM|CENPU|DSN1|TUBA1C|SGO1|SKA1	-17.9203	0	1	0	0	-66.1471	9.58135
1	-20.7799	R-HSA-2555396	M1	1	0	Reactome Gene Sets	6	Mitotic Metaphase and Anaphase	-20.7799	7.32522	14.457	24155	202	604	37	6.12583	0.975746	332|699|701|1063|4000|4085|5515|5701|5708|5718|7112|7846|8379|8815|9126|9184|9232|9735|9793|10197|10376|10381|10383|11130|54821|54908|55055|55839|57405|64105|64946|79019|79682|79980|84790|151648|220134	BIRC5|BUB1|BUB1B|CENPF|LMNA|MAD2L1|PPP2CA|PSMC2|PSMD2|PSMD12|TMPO|TUBA1A|MAD1L1|BANF1|SMC3|BUB3|PTTG1|KNTC1|CKAP5|PSME3|TUBA1B|TUBB3|TUBB4B|ZWINT|ERCC6L|SPDL1|ZWILCH|CENPN|SPC25|CENPK|CENPH|CENPM|CENPU|DSN1|TUBA1C|SGO1|SKA1	-17.8603	0	1	0	0	-66.1471	9.58135
1	-20.386	R-HSA-2500257	M1	1	0	Reactome Gene Sets	6	Resolution of Sister Chromatid Cohesion	-20.386	9.52184	15.3589	24155	126	604	30	4.96689	0.884018	332|699|701|891|1063|4085|5515|7846|8379|9126|9184|9735|9793|10376|10381|10383|11130|54821|54908|55055|55839|57405|64105|64946|79019|79682|79980|84790|151648|220134	BIRC5|BUB1|BUB1B|CCNB1|CENPF|MAD2L1|PPP2CA|TUBA1A|MAD1L1|SMC3|BUB3|KNTC1|CKAP5|TUBA1B|TUBB3|TUBB4B|ZWINT|ERCC6L|SPDL1|ZWILCH|CENPN|SPC25|CENPK|CENPH|CENPM|CENPU|DSN1|TUBA1C|SGO1|SKA1	-17.4999	0	1	0	0	-66.1471	9.58135
1	-18.8014	R-HSA-2467813	M1	1	0	Reactome Gene Sets	6	Separation of Sister Chromatids	-18.8014	7.15641	13.6434	24155	190	604	34	5.62914	0.937824	332|699|701|1063|4085|5515|5701|5708|5718|7846|8379|9126|9184|9232|9735|9793|10197|10376|10381|10383|11130|54821|54908|55055|55839|57405|64105|64946|79019|79682|79980|84790|151648|220134	BIRC5|BUB1|BUB1B|CENPF|MAD2L1|PPP2CA|PSMC2|PSMD2|PSMD12|TUBA1A|MAD1L1|SMC3|BUB3|PTTG1|KNTC1|CKAP5|PSME3|TUBA1B|TUBB3|TUBB4B|ZWINT|ERCC6L|SPDL1|ZWILCH|CENPN|SPC25|CENPK|CENPH|CENPM|CENPU|DSN1|TUBA1C|SGO1|SKA1	-15.9904	0	1	0	0	-66.1471	9.58135
1	-17.9345	R-HSA-5663220	M1	1	0	Reactome Gene Sets	6	RHO GTPases Activate Formins	-17.9345	8.284	13.8421	24155	140	604	29	4.80132	0.869916	332|699|701|1063|4085|5515|7846|8379|9184|9735|9793|10376|10381|10383|11130|54821|54908|55055|55839|57405|64105|64946|79019|79682|79980|81624|84790|151648|220134	BIRC5|BUB1|BUB1B|CENPF|MAD2L1|PPP2CA|TUBA1A|MAD1L1|BUB3|KNTC1|CKAP5|TUBA1B|TUBB3|TUBB4B|ZWINT|ERCC6L|SPDL1|ZWILCH|CENPN|SPC25|CENPK|CENPH|CENPM|CENPU|DSN1|DIAPH3|TUBA1C|SGO1|SKA1	-15.1733	0	1	0	0	-66.1471	9.58135
1	-17.494	R-HSA-195258	M1	1	0	Reactome Gene Sets	6	RHO GTPase Effectors	-17.494	5.13655	12.0608	24155	327	604	42	6.95364	1.03499	332|699|701|805|1063|3014|3015|4085|5515|5578|5880|7534|7846|8364|8379|9055|9184|9735|9793|9928|10376|10381|10383|10458|10552|10971|11130|54821|54908|55055|55839|57405|64105|64946|79019|79682|79980|81624|84790|94239|151648|220134	BIRC5|BUB1|BUB1B|CALM2|CENPF|H2AX|H2AZ1|MAD2L1|PPP2CA|PRKCA|RAC2|YWHAZ|TUBA1A|H4C3|MAD1L1|PRC1|BUB3|KNTC1|CKAP5|KIF14|TUBA1B|TUBB3|TUBB4B|BAIAP2|ARPC1A|YWHAQ|ZWINT|ERCC6L|SPDL1|ZWILCH|CENPN|SPC25|CENPK|CENPH|CENPM|CENPU|DSN1|DIAPH3|TUBA1C|H2AZ2|SGO1|SKA1	-14.7447	0	1	0	0	-66.1471	9.58135
1	-17.0996	R-HSA-194315	M1	1	0	Reactome Gene Sets	6	Signaling by Rho GTPases	-17.0996	4.3068	11.4038	24155	455	604	49	8.11258	1.11094	332|699|701|805|1063|3014|3015|4085|5515|5578|5880|7074|7534|7846|8364|8379|9055|9184|9735|9754|9793|9912|9928|10276|10376|10381|10383|10458|10552|10971|11130|29127|54821|54908|55055|55114|55839|57405|57580|64105|64946|79019|79682|79980|81624|84790|94239|151648|220134	BIRC5|BUB1|BUB1B|CALM2|CENPF|H2AX|H2AZ1|MAD2L1|PPP2CA|PRKCA|RAC2|TIAM1|YWHAZ|TUBA1A|H4C3|MAD1L1|PRC1|BUB3|KNTC1|STARD8|CKAP5|ARHGAP44|KIF14|NET1|TUBA1B|TUBB3|TUBB4B|BAIAP2|ARPC1A|YWHAQ|ZWINT|RACGAP1|ERCC6L|SPDL1|ZWILCH|ARHGAP17|CENPN|SPC25|PREX1|CENPK|CENPH|CENPM|CENPU|DSN1|DIAPH3|TUBA1C|H2AZ2|SGO1|SKA1	-14.3731	0	1	0	0	-66.1471	9.58135
1	-15.8314	R-HSA-141424	M1	1	0	Reactome Gene Sets	6	Amplification of signal from the kinetochores	-15.8314	9.58135	13.4915	24155	96	604	23	3.80795	0.778747	332|699|701|1063|4085|5515|8379|9184|9735|9793|11130|54821|54908|55055|55839|57405|64105|64946|79019|79682|79980|151648|220134	BIRC5|BUB1|BUB1B|CENPF|MAD2L1|PPP2CA|MAD1L1|BUB3|KNTC1|CKAP5|ZWINT|ERCC6L|SPDL1|ZWILCH|CENPN|SPC25|CENPK|CENPH|CENPM|CENPU|DSN1|SGO1|SKA1	-13.204	0	1	0	0	-66.1471	9.58135
1	-15.8314	R-HSA-141444	M1	1	0	Reactome Gene Sets	6	Amplification of signal from unattached kinetochores via a MAD2 inhibitory signal	-15.8314	9.58135	13.4915	24155	96	604	23	3.80795	0.778747	332|699|701|1063|4085|5515|8379|9184|9735|9793|11130|54821|54908|55055|55839|57405|64105|64946|79019|79682|79980|151648|220134	BIRC5|BUB1|BUB1B|CENPF|MAD2L1|PPP2CA|MAD1L1|BUB3|KNTC1|CKAP5|ZWINT|ERCC6L|SPDL1|ZWILCH|CENPN|SPC25|CENPK|CENPH|CENPM|CENPU|DSN1|SGO1|SKA1	-13.204	0	1	0	0	-66.1471	9.58135
1	-14.2618	R-HSA-69618	M1	1	0	Reactome Gene Sets	6	Mitotic Spindle Checkpoint	-14.2618	8.21259	12.2522	24155	112	604	23	3.80795	0.778747	332|699|701|1063|4085|5515|8379|9184|9735|9793|11130|54821|54908|55055|55839|57405|64105|64946|79019|79682|79980|151648|220134	BIRC5|BUB1|BUB1B|CENPF|MAD2L1|PPP2CA|MAD1L1|BUB3|KNTC1|CKAP5|ZWINT|ERCC6L|SPDL1|ZWILCH|CENPN|SPC25|CENPK|CENPH|CENPM|CENPU|DSN1|SGO1|SKA1	-11.708	0	1	0	0	-66.1471	9.58135
1	-32.8593	GO:0044770	M1	1	0	GO Biological Processes	19	cell cycle phase transition	-32.8593	5.07027	16.5917	24155	631	604	80	13.245	1.37929	672|699|701|891|993|994|1033|1063|1719|1956|2146|2305|3320|4085|4171|4172|4173|4174|4175|4176|4678|5111|5422|5426|5427|5557|5569|5701|5708|5718|5932|6117|6241|7027|7283|7298|7756|7846|8091|8318|8379|8444|8914|9088|9125|9184|9319|9555|9735|9738|9787|9793|9833|9928|10197|10383|10457|10460|10657|10733|10763|11040|11116|22822|22974|22995|23594|23649|29980|51512|51514|54443|54908|54962|55388|57520|794…	BRCA1|BUB1|BUB1B|CCNB1|CDC25A|CDC25B|CDKN3|CENPF|DHFR|EGFR|EZH2|FOXM1|HSP90AA1|MAD2L1|MCM2|MCM3|MCM4|MCM5|MCM6|MCM7|NASP|PCNA|POLA1|POLE|POLE2|PRIM1|PKIA|PSMC2|PSMD2|PSMD12|RBBP8|RPA1|RRM2|TFDP1|TUBG1|TYMS|ZNF207|TUBA1A|HMGA2|CDC45|MAD1L1|DYRK3|TIMELESS|PKMYT1|CNOT9|BUB3|TRIP13|MACROH2A1|KNTC1|CCP110|DLGAP5|CKAP5|MELK|KIF14|PSME3|TUBB4B|GPNMB|TACC3|KHDRBS1|PLK4|NES|PIM2|FGFR1OP|PHLDA1|TPX2|CEP152…	-29.1438	0	2	1	1	-32.8593	6.57398
1	-30.9441	GO:0044772	M1	1	0	GO Biological Processes	19	mitotic cell cycle phase transition	-30.9441	5.10098	16.1225	24155	588	604	75	12.4172	1.34185	672|699|701|891|993|994|1033|1063|1719|1956|2146|2305|3320|4085|4171|4172|4173|4174|4175|4176|4678|5111|5422|5426|5427|5557|5569|5701|5708|5718|5932|6117|6241|7027|7283|7298|7756|7846|8091|8318|8379|9088|9125|9184|9319|9735|9738|9787|9793|9833|9928|10197|10383|10457|10460|10657|10733|10763|11040|11116|22822|22974|22995|23594|23649|29980|51512|51514|54443|54908|55388|57520|93323|95681|144455	BRCA1|BUB1|BUB1B|CCNB1|CDC25A|CDC25B|CDKN3|CENPF|DHFR|EGFR|EZH2|FOXM1|HSP90AA1|MAD2L1|MCM2|MCM3|MCM4|MCM5|MCM6|MCM7|NASP|PCNA|POLA1|POLE|POLE2|PRIM1|PKIA|PSMC2|PSMD2|PSMD12|RBBP8|RPA1|RRM2|TFDP1|TUBG1|TYMS|ZNF207|TUBA1A|HMGA2|CDC45|MAD1L1|PKMYT1|CNOT9|BUB3|TRIP13|KNTC1|CCP110|DLGAP5|CKAP5|MELK|KIF14|PSME3|TUBB4B|GPNMB|TACC3|KHDRBS1|PLK4|NES|PIM2|FGFR1OP|PHLDA1|TPX2|CEP152|ORC6|POLA2|DONSON|GTSE1|…	-27.4047	0	2	0	0	-32.8593	6.57398
1	-26.8499	GO:0010564	M1	1	0	GO Biological Processes	19	regulation of cell cycle process	-26.8499	4.10561	14.2037	24155	789	604	81	13.4106	1.38656	274|672|699|701|805|891|993|994|1063|1956|2124|2146|2237|2305|2827|2956|3320|3832|3976|4085|4288|5111|5569|5701|5708|5718|5902|5932|6241|7027|7039|7283|7756|7846|8091|8318|8379|8444|9055|9088|9125|9126|9184|9232|9319|9493|9555|9735|9738|9787|9793|9928|10112|10197|10383|10457|10460|10615|10733|11116|22974|22995|23468|23512|23636|26255|29127|29980|51203|51512|51514|54443|54908|54962|57520|79447|801…	BIN1|BRCA1|BUB1|BUB1B|CALM2|CCNB1|CDC25A|CDC25B|CENPF|EGFR|EVI2B|EZH2|FEN1|FOXM1|GPR3|MSH6|HSP90AA1|KIF11|LIF|MAD2L1|MKI67|PCNA|PKIA|PSMC2|PSMD2|PSMD12|RANBP1|RBBP8|RRM2|TFDP1|TGFA|TUBG1|ZNF207|TUBA1A|HMGA2|CDC45|MAD1L1|DYRK3|PRC1|PKMYT1|CNOT9|SMC3|BUB3|PTTG1|TRIP13|KIF23|MACROH2A1|KNTC1|CCP110|DLGAP5|CKAP5|KIF14|KIF20A|PSME3|TUBB4B|GPNMB|TACC3|SPAG5|PLK4|FGFR1OP|TPX2|CEP152|CBX5|SUZ12|NUP62|PTTG…	-23.5737	0	2	0	0	-32.8593	6.57398
1	-20.4877	GO:0007346	M1	1	0	GO Biological Processes	19	regulation of mitotic cell cycle	-20.4877	3.93262	12.243	24155	661	604	65	10.7616	1.26094	672|699|701|891|993|994|1063|1163|1956|2146|3320|3832|4085|4288|5111|5569|5578|5701|5708|5718|5902|7027|7039|7283|7756|7846|8091|8318|8379|9088|9125|9126|9184|9232|9319|9555|9735|9738|9787|9793|9928|10197|10383|10457|10460|10733|11116|11130|22974|22995|23636|26255|29980|51203|51512|51514|54443|54908|54962|55055|57520|93323|95681|140609|144455	BRCA1|BUB1|BUB1B|CCNB1|CDC25A|CDC25B|CENPF|CKS1B|EGFR|EZH2|HSP90AA1|KIF11|MAD2L1|MKI67|PCNA|PKIA|PRKCA|PSMC2|PSMD2|PSMD12|RANBP1|TFDP1|TGFA|TUBG1|ZNF207|TUBA1A|HMGA2|CDC45|MAD1L1|PKMYT1|CNOT9|SMC3|BUB3|PTTG1|TRIP13|MACROH2A1|KNTC1|CCP110|DLGAP5|CKAP5|KIF14|PSME3|TUBB4B|GPNMB|TACC3|PLK4|FGFR1OP|ZWINT|TPX2|CEP152|NUP62|PTTG3P|DONSON|NUSAP1|GTSE1|DTL|ANLN|SPDL1|TIPIN|ZWILCH|HECW2|HAUS8|CEP41|NEK7|E2…	-17.5852	0	2	0	0	-32.8593	6.57398
1	-16.8362	GO:1901987	M1	1	0	GO Biological Processes	19	regulation of cell cycle phase transition	-16.8362	4.1658	11.2194	24155	480	604	50	8.27815	1.1212	672|699|701|891|993|994|1063|1956|2146|3320|4085|5111|5569|5701|5708|5718|7027|7283|7756|7846|8091|8318|8379|8444|9125|9184|9319|9555|9735|9738|9787|9793|9928|10197|10383|10457|10733|11116|22974|22995|29980|51512|51514|54443|54908|57520|79447|93323|95681|144455	BRCA1|BUB1|BUB1B|CCNB1|CDC25A|CDC25B|CENPF|EGFR|EZH2|HSP90AA1|MAD2L1|PCNA|PKIA|PSMC2|PSMD2|PSMD12|TFDP1|TUBG1|ZNF207|TUBA1A|HMGA2|CDC45|MAD1L1|DYRK3|CNOT9|BUB3|TRIP13|MACROH2A1|KNTC1|CCP110|DLGAP5|CKAP5|KIF14|PSME3|TUBB4B|GPNMB|PLK4|FGFR1OP|TPX2|CEP152|DONSON|GTSE1|DTL|ANLN|SPDL1|HECW2|PAGR1|HAUS8|CEP41|E2F7	-14.1314	0	2	0	0	-32.8593	6.57398
1	-16.1216	GO:1901990	M1	1	0	GO Biological Processes	19	regulation of mitotic cell cycle phase transition	-16.1216	4.23336	11.0123	24155	444	604	47	7.78146	1.08999	672|699|701|891|993|994|1063|1956|2146|3320|4085|5111|5569|5701|5708|5718|7027|7283|7756|7846|8091|8318|8379|9125|9184|9319|9735|9738|9787|9793|9928|10197|10383|10457|10733|11116|22974|22995|29980|51512|51514|54443|54908|57520|93323|95681|144455	BRCA1|BUB1|BUB1B|CCNB1|CDC25A|CDC25B|CENPF|EGFR|EZH2|HSP90AA1|MAD2L1|PCNA|PKIA|PSMC2|PSMD2|PSMD12|TFDP1|TUBG1|ZNF207|TUBA1A|HMGA2|CDC45|MAD1L1|CNOT9|BUB3|TRIP13|KNTC1|CCP110|DLGAP5|CKAP5|KIF14|PSME3|TUBB4B|GPNMB|PLK4|FGFR1OP|TPX2|CEP152|DONSON|GTSE1|DTL|ANLN|SPDL1|HECW2|HAUS8|CEP41|E2F7	-13.4376	0	2	0	0	-32.8593	6.57398
1	-14.9874	GO:0044839	M1	1	0	GO Biological Processes	19	cell cycle G2/M phase transition	-14.9874	5.26207	11.1936	24155	266	604	35	5.7947	0.950681	672|891|993|994|1063|2305|3320|5569|5701|5708|5718|7283|7846|8091|8444|9088|9555|9738|9793|9833|9928|10197|10383|10657|10733|10763|11116|22822|22974|22995|29980|51512|51514|93323|95681	BRCA1|CCNB1|CDC25A|CDC25B|CENPF|FOXM1|HSP90AA1|PKIA|PSMC2|PSMD2|PSMD12|TUBG1|TUBA1A|HMGA2|DYRK3|PKMYT1|MACROH2A1|CCP110|CKAP5|MELK|KIF14|PSME3|TUBB4B|KHDRBS1|PLK4|NES|FGFR1OP|PHLDA1|TPX2|CEP152|DONSON|GTSE1|DTL|HAUS8|CEP41	-12.3859	0	2	0	0	-32.8593	6.57398
1	-14.7227	R-HSA-69275	M1	1	0	Reactome Gene Sets	6	G2/M Transition	-14.7227	6.12118	11.5285	24155	196	604	30	4.96689	0.884018	891|993|994|1063|2305|3320|5515|5701|5708|5718|7283|7846|9088|9738|9793|10197|10376|10381|10383|10733|11116|22822|22974|22995|28227|51512|84790|93323|95681|440145	CCNB1|CDC25A|CDC25B|CENPF|FOXM1|HSP90AA1|PPP2CA|PSMC2|PSMD2|PSMD12|TUBG1|TUBA1A|PKMYT1|CCP110|CKAP5|PSME3|TUBA1B|TUBB3|TUBB4B|PLK4|FGFR1OP|PHLDA1|TPX2|CEP152|PPP2R3B|GTSE1|TUBA1C|HAUS8|CEP41|MZT1	-12.1295	0	2	0	0	-32.8593	6.57398
1	-14.5999	R-HSA-453274	M1	1	0	Reactome Gene Sets	6	Mitotic G2-G2/M phases	-14.5999	6.05935	11.4477	24155	198	604	30	4.96689	0.884018	891|993|994|1063|2305|3320|5515|5701|5708|5718|7283|7846|9088|9738|9793|10197|10376|10381|10383|10733|11116|22822|22974|22995|28227|51512|84790|93323|95681|440145	CCNB1|CDC25A|CDC25B|CENPF|FOXM1|HSP90AA1|PPP2CA|PSMC2|PSMD2|PSMD12|TUBG1|TUBA1A|PKMYT1|CCP110|CKAP5|PSME3|TUBA1B|TUBB3|TUBB4B|PLK4|FGFR1OP|PHLDA1|TPX2|CEP152|PPP2R3B|GTSE1|TUBA1C|HAUS8|CEP41|MZT1	-12.0147	0	2	0	0	-32.8593	6.57398
1	-13.5586	GO:0000086	M1	1	0	GO Biological Processes	19	G2/M transition of mitotic cell cycle	-13.5586	5.18111	10.5774	24155	247	604	32	5.29801	0.911418	672|891|993|994|1063|2305|3320|5569|5701|5708|5718|7283|7846|8091|9088|9738|9793|9833|9928|10197|10383|10657|10733|10763|11116|22822|22974|22995|29980|51514|93323|95681	BRCA1|CCNB1|CDC25A|CDC25B|CENPF|FOXM1|HSP90AA1|PKIA|PSMC2|PSMD2|PSMD12|TUBG1|TUBA1A|HMGA2|PKMYT1|CCP110|CKAP5|MELK|KIF14|PSME3|TUBB4B|KHDRBS1|PLK4|NES|FGFR1OP|PHLDA1|TPX2|CEP152|DONSON|DTL|HAUS8|CEP41	-11.0606	0	2	0	0	-32.8593	6.57398
1	-12.9019	GO:1902749	M1	1	0	GO Biological Processes	19	regulation of cell cycle G2/M phase transition	-12.9019	5.44488	10.4347	24155	213	604	29	4.80132	0.869916	672|891|993|994|1063|3320|5569|5701|5708|5718|7283|7846|8091|8444|9555|9738|9793|9928|10197|10383|10733|11116|22974|22995|29980|51512|51514|93323|95681	BRCA1|CCNB1|CDC25A|CDC25B|CENPF|HSP90AA1|PKIA|PSMC2|PSMD2|PSMD12|TUBG1|TUBA1A|HMGA2|DYRK3|MACROH2A1|CCP110|CKAP5|KIF14|PSME3|TUBB4B|PLK4|FGFR1OP|TPX2|CEP152|DONSON|GTSE1|DTL|HAUS8|CEP41	-10.4641	0	2	0	0	-32.8593	6.57398
1	-11.3666	GO:0010389	M1	1	0	GO Biological Processes	19	regulation of G2/M transition of mitotic cell cycle	-11.3666	5.30502	9.6912	24155	196	604	26	4.30464	0.825839	672|891|993|994|1063|3320|5569|5701|5708|5718|7283|7846|8091|9738|9793|9928|10197|10383|10733|11116|22974|22995|29980|51514|93323|95681	BRCA1|CCNB1|CDC25A|CDC25B|CENPF|HSP90AA1|PKIA|PSMC2|PSMD2|PSMD12|TUBG1|TUBA1A|HMGA2|CCP110|CKAP5|KIF14|PSME3|TUBB4B|PLK4|FGFR1OP|TPX2|CEP152|DONSON|DTL|HAUS8|CEP41	-9.00326	0	2	0	0	-32.8593	6.57398
1	-7.92759	R-HSA-380320	M1	1	0	Reactome Gene Sets	6	Recruitment of NuMA to mitotic centrosomes	-7.92759	6.38166	8.37204	24155	94	604	15	2.48344	0.63321	3320|7283|7846|9738|9793|10376|10381|10383|10733|11116|22995|84790|93323|95681|440145	HSP90AA1|TUBG1|TUBA1A|CCP110|CKAP5|TUBA1B|TUBB3|TUBB4B|PLK4|FGFR1OP|CEP152|TUBA1C|HAUS8|CEP41|MZT1	-5.8629	0	2	0	0	-32.8593	6.57398
1	-6.61027	R-HSA-8854518	M1	1	0	Reactome Gene Sets	6	AURKA Activation by TPX2	-6.61027	6.57398	7.63816	24155	73	604	12	1.98675	0.567801	3320|7283|7846|9738|9793|10383|10733|11116|22974|22995|93323|95681	HSP90AA1|TUBG1|TUBA1A|CCP110|CKAP5|TUBB4B|PLK4|FGFR1OP|TPX2|CEP152|HAUS8|CEP41	-4.66008	0	2	0	0	-32.8593	6.57398
1	-6.15372	GO:0097711	M1	1	0	GO Biological Processes	19	ciliary basal body-plasma membrane docking	-6.15372	5.47255	6.99484	24155	95	604	13	2.15232	0.590487	3320|7283|7846|9738|9793|10383|10733|11116|22995|84902|93323|95681|347240	HSP90AA1|TUBG1|TUBA1A|CCP110|CKAP5|TUBB4B|PLK4|FGFR1OP|CEP152|CEP89|HAUS8|CEP41|KIF24	-4.2478	0	2	0	0	-32.8593	6.57398
1	-6.04528	R-HSA-380270	M1	1	0	Reactome Gene Sets	6	Recruitment of mitotic centrosome proteins and complexes	-6.04528	5.85245	7.04873	24155	82	604	12	1.98675	0.567801	3320|7283|7846|9738|9793|10383|10733|11116|22995|93323|95681|440145	HSP90AA1|TUBG1|TUBA1A|CCP110|CKAP5|TUBB4B|PLK4|FGFR1OP|CEP152|HAUS8|CEP41|MZT1	-4.14934	0	2	0	0	-32.8593	6.57398
1	-6.04528	R-HSA-380287	M1	1	0	Reactome Gene Sets	6	Centrosome maturation	-6.04528	5.85245	7.04873	24155	82	604	12	1.98675	0.567801	3320|7283|7846|9738|9793|10383|10733|11116|22995|93323|95681|440145	HSP90AA1|TUBG1|TUBA1A|CCP110|CKAP5|TUBB4B|PLK4|FGFR1OP|CEP152|HAUS8|CEP41|MZT1	-4.14934	0	2	0	0	-32.8593	6.57398
1	-5.99594	R-HSA-5620912	M1	1	0	Reactome Gene Sets	6	Anchoring of the basal body to the plasma membrane	-5.99594	5.30502	6.83874	24155	98	604	13	2.15232	0.590487	3320|7283|7846|9738|9793|10383|10733|11116|22995|84902|93323|95681|347240	HSP90AA1|TUBG1|TUBA1A|CCP110|CKAP5|TUBB4B|PLK4|FGFR1OP|CEP152|CEP89|HAUS8|CEP41|KIF24	-4.10654	0	2	0	0	-32.8593	6.57398
1	-5.90644	R-HSA-380259	M1	1	0	Reactome Gene Sets	6	Loss of Nlp from mitotic centrosomes	-5.90644	6.28441	7.09056	24155	70	604	11	1.82119	0.544087	3320|7283|7846|9738|9793|10383|10733|11116|22995|93323|95681	HSP90AA1|TUBG1|TUBA1A|CCP110|CKAP5|TUBB4B|PLK4|FGFR1OP|CEP152|HAUS8|CEP41	-4.02187	0	2	0	0	-32.8593	6.57398
1	-5.90644	R-HSA-380284	M1	1	0	Reactome Gene Sets	6	Loss of proteins required for interphase microtubule organization from the centrosome	-5.90644	6.28441	7.09056	24155	70	604	11	1.82119	0.544087	3320|7283|7846|9738|9793|10383|10733|11116|22995|93323|95681	HSP90AA1|TUBG1|TUBA1A|CCP110|CKAP5|TUBB4B|PLK4|FGFR1OP|CEP152|HAUS8|CEP41	-4.02187	0	2	0	0	-32.8593	6.57398
1	-5.71017	R-HSA-2565942	M1	1	0	Reactome Gene Sets	6	Regulation of PLK1 Activity at G2/M Transition	-5.71017	5.45342	6.70243	24155	88	604	12	1.98675	0.567801	891|3320|7283|7846|9738|9793|10383|10733|11116|22995|93323|95681	CCNB1|HSP90AA1|TUBG1|TUBA1A|CCP110|CKAP5|TUBB4B|PLK4|FGFR1OP|CEP152|HAUS8|CEP41	-3.85503	0	2	0	0	-32.8593	6.57398
1	-5.20858	R-HSA-1852241	M1	1	0	Reactome Gene Sets	6	Organelle biogenesis and maintenance	-5.20858	2.97236	5.46781	24155	296	604	22	3.64238	0.762285	805|2553|3054|3320|7283|7846|9738|9793|10376|10381|10383|10733|11116|22995|23082|51106|84790|84902|89891|93323|95681|347240	CALM2|GABPB1|HCFC1|HSP90AA1|TUBG1|TUBA1A|CCP110|CKAP5|TUBA1B|TUBB3|TUBB4B|PLK4|FGFR1OP|CEP152|PPRC1|TFB1M|TUBA1C|CEP89|WDR34|HAUS8|CEP41|KIF24	-3.39754	0	2	0	0	-32.8593	6.57398
1	-4.87757	R-HSA-5617833	M1	1	0	Reactome Gene Sets	6	Cilium Assembly	-4.87757	3.38238	5.43162	24155	201	604	17	2.81457	0.672958	3320|7283|7846|9738|9793|10376|10381|10383|10733|11116|22995|84790|84902|89891|93323|95681|347240	HSP90AA1|TUBG1|TUBA1A|CCP110|CKAP5|TUBA1B|TUBB3|TUBB4B|PLK4|FGFR1OP|CEP152|TUBA1C|CEP89|WDR34|HAUS8|CEP41|KIF24	-3.1078	0	2	0	0	-32.8593	6.57398
1	-4.61951	GO:0140056	M1	1	0	GO Biological Processes	19	organelle localization by membrane tethering	-4.61951	3.54956	5.32645	24155	169	604	15	2.48344	0.63321	3320|6804|7283|7846|9738|9793|10383|10733|11116|22995|23344|84902|93323|95681|347240	HSP90AA1|STX1A|TUBG1|TUBA1A|CCP110|CKAP5|TUBB4B|PLK4|FGFR1OP|CEP152|ESYT1|CEP89|HAUS8|CEP41|KIF24	-2.88403	0	2	0	0	-32.8593	6.57398
1	-4.35641	GO:0022406	M1	1	0	GO Biological Processes	19	membrane docking	-4.35641	3.37009	5.0826	24155	178	604	15	2.48344	0.63321	3320|6804|7283|7846|9738|9793|10383|10733|11116|22995|23344|84902|93323|95681|347240	HSP90AA1|STX1A|TUBG1|TUBA1A|CCP110|CKAP5|TUBB4B|PLK4|FGFR1OP|CEP152|ESYT1|CEP89|HAUS8|CEP41|KIF24	-2.64409	0	2	0	0	-32.8593	6.57398
1	-2.98781	GO:0120031	M1	1	0	GO Biological Processes	19	plasma membrane bounded cell projection assembly	-2.98781	1.8947	3.52659	24155	591	604	28	4.63576	0.855529	2150|2596|3320|3655|5880|7283|7846|9353|9738|9793|9912|10383|10733|11116|22995|23043|25937|26499|54443|55329|56683|84260|84902|89891|93323|95681|117178|347240	F2RL1|GAP43|HSP90AA1|ITGA6|RAC2|TUBG1|TUBA1A|SLIT2|CCP110|CKAP5|ARHGAP44|TUBB4B|PLK4|FGFR1OP|CEP152|TNIK|WWTR1|PLEK2|ANLN|MNS1|CFAP298|TCHP|CEP89|WDR34|HAUS8|CEP41|SSX2IP|KIF24	-1.49309	0	2	0	0	-32.8593	6.57398
1	-2.85854	GO:0030031	M1	1	0	GO Biological Processes	19	cell projection assembly	-2.85854	1.857	3.41296	24155	603	604	28	4.63576	0.855529	2150|2596|3320|3655|5880|7283|7846|9353|9738|9793|9912|10383|10733|11116|22995|23043|25937|26499|54443|55329|56683|84260|84902|89891|93323|95681|117178|347240	F2RL1|GAP43|HSP90AA1|ITGA6|RAC2|TUBG1|TUBA1A|SLIT2|CCP110|CKAP5|ARHGAP44|TUBB4B|PLK4|FGFR1OP|CEP152|TNIK|WWTR1|PLEK2|ANLN|MNS1|CFAP298|TCHP|CEP89|WDR34|HAUS8|CEP41|SSX2IP|KIF24	-1.39409	0	2	0	0	-32.8593	6.57398
1	-2.39643	GO:0044782	M1	1	0	GO Biological Processes	19	cilium organization	-2.39643	1.93665	3.07468	24155	413	604	20	3.31126	0.728058	3320|7283|7846|9738|9793|10383|10733|11116|22995|25914|25937|55329|56683|84260|84902|89891|93323|95681|117178|347240	HSP90AA1|TUBG1|TUBA1A|CCP110|CKAP5|TUBB4B|PLK4|FGFR1OP|CEP152|RTTN|WWTR1|MNS1|CFAP298|TCHP|CEP89|WDR34|HAUS8|CEP41|SSX2IP|KIF24	-1.03216	0	2	0	0	-32.8593	6.57398
1	-2.2732	GO:0060271	M1	1	0	GO Biological Processes	19	cilium assembly	-2.2732	1.92365	2.9641	24155	395	604	19	3.1457	0.710231	3320|7283|7846|9738|9793|10383|10733|11116|22995|25937|55329|56683|84260|84902|89891|93323|95681|117178|347240	HSP90AA1|TUBG1|TUBA1A|CCP110|CKAP5|TUBB4B|PLK4|FGFR1OP|CEP152|WWTR1|MNS1|CFAP298|TCHP|CEP89|WDR34|HAUS8|CEP41|SSX2IP|KIF24	-0.936117	0	2	0	0	-32.8593	6.57398
1	-32.0667	GO:0051301	M1	1	0	GO Biological Processes	19	cell division	-32.0667	5.14944	16.4546	24155	598	604	77	12.7483	1.35705	332|699|701|805|891|993|994|1063|1163|2119|2124|2247|3070|3832|3925|3978|4085|5932|7039|7756|7846|8091|8379|8444|8914|9055|9126|9184|9232|9493|9735|9738|9793|9918|9928|10051|10112|10376|10460|10592|10615|10982|11130|11339|22974|23310|23594|23636|24137|25937|26586|29127|51203|54069|54443|54478|54821|54888|54908|54962|55055|55165|56034|57405|64151|79980|80179|83461|84790|89958|93323|144455|151648|2…	BIRC5|BUB1|BUB1B|CALM2|CCNB1|CDC25A|CDC25B|CENPF|CKS1B|ETV5|EVI2B|FGF2|HELLS|KIF11|STMN1|LIG1|MAD2L1|RBBP8|TGFA|ZNF207|TUBA1A|HMGA2|MAD1L1|DYRK3|TIMELESS|PRC1|SMC3|BUB3|PTTG1|KIF23|KNTC1|CCP110|CKAP5|NCAPD2|KIF14|SMC4|KIF20A|TUBA1B|TACC3|SMC2|SPAG5|MAPRE2|ZWINT|OIP5|TPX2|NCAPD3|ORC6|NUP62|KIF4A|WWTR1|CKAP2|RACGAP1|NUSAP1|MIS18A|ANLN|PIMREG|ERCC6L|NSUN2|SPDL1|TIPIN|ZWILCH|CEP55|PDGFC|SPC25|NCAPG|D…	-28.4481	0	3	1	1	-32.0667	12.3051
1	-26.3883	GO:0140014	M1	1	0	GO Biological Processes	19	mitotic nuclear division	-26.3883	7.1627	16.2467	24155	268	604	48	7.94702	1.10053	332|699|701|891|1063|3832|4085|4288|5902|7039|7283|7756|8379|9055|9088|9126|9184|9232|9319|9493|9555|9735|9787|9918|9928|10051|10460|10592|10615|11130|22974|23310|23636|24137|26255|29127|29781|51203|54443|54908|55165|57520|64105|64151|79980|83903|151648|440145	BIRC5|BUB1|BUB1B|CCNB1|CENPF|KIF11|MAD2L1|MKI67|RANBP1|TGFA|TUBG1|ZNF207|MAD1L1|PRC1|PKMYT1|SMC3|BUB3|PTTG1|TRIP13|KIF23|MACROH2A1|KNTC1|DLGAP5|NCAPD2|KIF14|SMC4|TACC3|SMC2|SPAG5|ZWINT|TPX2|NCAPD3|NUP62|KIF4A|PTTG3P|RACGAP1|NCAPH2|NUSAP1|ANLN|SPDL1|CEP55|HECW2|CENPK|NCAPG|DSN1|HASPIN|SGO1|MZT1	-23.15	0	3	0	0	-32.0667	12.3051
1	-26.1948	GO:0007059	M1	1	0	GO Biological Processes	19	chromosome segregation	-26.1948	6.41842	15.7247	24155	324	604	52	8.60927	1.14134	332|672|699|701|891|1063|2177|2237|4085|4288|7283|7756|8379|8815|9055|9126|9184|9232|9319|9493|9555|9787|9918|9928|10051|10460|10592|10615|11130|11339|23310|23636|24137|26255|29127|29781|51203|54069|54908|55165|55706|55839|57405|57520|64105|64151|79980|83903|151648|220134|221150|387103	BIRC5|BRCA1|BUB1|BUB1B|CCNB1|CENPF|FANCD2|FEN1|MAD2L1|MKI67|TUBG1|ZNF207|MAD1L1|BANF1|PRC1|SMC3|BUB3|PTTG1|TRIP13|KIF23|MACROH2A1|DLGAP5|NCAPD2|KIF14|SMC4|TACC3|SMC2|SPAG5|ZWINT|OIP5|NCAPD3|NUP62|KIF4A|PTTG3P|RACGAP1|NCAPH2|NUSAP1|MIS18A|SPDL1|CEP55|NDC1|CENPN|SPC25|HECW2|CENPK|NCAPG|DSN1|HASPIN|SGO1|SKA1|SKA3|CENPW	-22.9912	0	3	0	0	-32.0667	12.3051
1	-25.3462	GO:0000280	M1	1	0	GO Biological Processes	19	nuclear division	-25.3462	5.5463	14.8871	24155	411	604	57	9.43709	1.18953	332|699|701|891|994|1063|2177|2827|3832|3976|4085|4288|5902|7039|7283|7756|8379|8438|9055|9088|9126|9184|9232|9319|9493|9555|9735|9787|9918|9928|10051|10460|10592|10615|11130|22974|23310|23636|24137|25788|26255|29127|29781|29893|51203|54443|54908|55165|55706|57520|64105|64151|79980|83903|84057|151648|440145	BIRC5|BUB1|BUB1B|CCNB1|CDC25B|CENPF|FANCD2|GPR3|KIF11|LIF|MAD2L1|MKI67|RANBP1|TGFA|TUBG1|ZNF207|MAD1L1|RAD54L|PRC1|PKMYT1|SMC3|BUB3|PTTG1|TRIP13|KIF23|MACROH2A1|KNTC1|DLGAP5|NCAPD2|KIF14|SMC4|TACC3|SMC2|SPAG5|ZWINT|TPX2|NCAPD3|NUP62|KIF4A|RAD54B|PTTG3P|RACGAP1|NCAPH2|PSMC3IP|NUSAP1|ANLN|SPDL1|CEP55|NDC1|HECW2|CENPK|NCAPG|DSN1|HASPIN|MND1|SGO1|MZT1	-22.2591	0	3	0	0	-32.0667	12.3051
1	-25.1756	GO:0000070	M1	1	0	GO Biological Processes	19	mitotic sister chromatid segregation	-25.1756	9.6084	17.1623	24155	154	604	37	6.12583	0.975746	699|701|891|1063|4085|7283|7756|8379|9055|9184|9232|9319|9493|9555|9787|9918|9928|10051|10460|10592|10615|11130|23310|23636|24137|26255|29127|29781|51203|54908|55165|57520|64105|64151|79980|83903|151648	BUB1|BUB1B|CCNB1|CENPF|MAD2L1|TUBG1|ZNF207|MAD1L1|PRC1|BUB3|PTTG1|TRIP13|KIF23|MACROH2A1|DLGAP5|NCAPD2|KIF14|SMC4|TACC3|SMC2|SPAG5|ZWINT|NCAPD3|NUP62|KIF4A|PTTG3P|RACGAP1|NCAPH2|NUSAP1|SPDL1|CEP55|HECW2|CENPK|NCAPG|DSN1|HASPIN|SGO1	-22.1133	0	3	0	0	-32.0667	12.3051
1	-23.9768	GO:0048285	M1	1	0	GO Biological Processes	19	organelle fission	-23.9768	5.12035	14.1775	24155	453	604	58	9.60265	1.19882	332|699|701|891|994|1063|2177|2827|3832|3976|4085|4288|5902|7039|7283|7756|8379|8438|9055|9088|9126|9184|9232|9319|9493|9555|9735|9787|9918|9928|10051|10460|10592|10615|11130|22974|23310|23636|24137|25788|26255|29127|29781|29893|51203|54443|54908|55165|55706|57520|64105|64151|79980|80179|83903|84057|151648|440145	BIRC5|BUB1|BUB1B|CCNB1|CDC25B|CENPF|FANCD2|GPR3|KIF11|LIF|MAD2L1|MKI67|RANBP1|TGFA|TUBG1|ZNF207|MAD1L1|RAD54L|PRC1|PKMYT1|SMC3|BUB3|PTTG1|TRIP13|KIF23|MACROH2A1|KNTC1|DLGAP5|NCAPD2|KIF14|SMC4|TACC3|SMC2|SPAG5|ZWINT|TPX2|NCAPD3|NUP62|KIF4A|RAD54B|PTTG3P|RACGAP1|NCAPH2|PSMC3IP|NUSAP1|ANLN|SPDL1|CEP55|NDC1|HECW2|CENPK|NCAPG|DSN1|MYO19|HASPIN|MND1|SGO1|MZT1	-20.9381	0	3	0	0	-32.0667	12.3051
1	-23.6081	GO:0000819	M1	1	0	GO Biological Processes	19	sister chromatid segregation	-23.6081	8.12332	15.8698	24155	192	604	39	6.45695	1	699|701|891|1063|2237|4085|7283|7756|8379|9055|9126|9184|9232|9319|9493|9555|9787|9918|9928|10051|10460|10592|10615|11130|23310|23636|24137|26255|29127|29781|51203|54908|55165|57520|64105|64151|79980|83903|151648	BUB1|BUB1B|CCNB1|CENPF|FEN1|MAD2L1|TUBG1|ZNF207|MAD1L1|PRC1|SMC3|BUB3|PTTG1|TRIP13|KIF23|MACROH2A1|DLGAP5|NCAPD2|KIF14|SMC4|TACC3|SMC2|SPAG5|ZWINT|NCAPD3|NUP62|KIF4A|PTTG3P|RACGAP1|NCAPH2|NUSAP1|SPDL1|CEP55|HECW2|CENPK|NCAPG|DSN1|HASPIN|SGO1	-20.6128	0	3	0	0	-32.0667	12.3051
1	-20.1082	GO:0098813	M1	1	0	GO Biological Processes	19	nuclear chromosome segregation	-20.1082	6.1874	13.5979	24155	265	604	41	6.78808	1.02351	699|701|891|1063|2177|2237|4085|7283|7756|8379|9055|9126|9184|9232|9319|9493|9555|9787|9918|9928|10051|10460|10592|10615|11130|23310|23636|24137|26255|29127|29781|51203|54908|55165|55706|57520|64105|64151|79980|83903|151648	BUB1|BUB1B|CCNB1|CENPF|FANCD2|FEN1|MAD2L1|TUBG1|ZNF207|MAD1L1|PRC1|SMC3|BUB3|PTTG1|TRIP13|KIF23|MACROH2A1|DLGAP5|NCAPD2|KIF14|SMC4|TACC3|SMC2|SPAG5|ZWINT|NCAPD3|NUP62|KIF4A|PTTG3P|RACGAP1|NCAPH2|NUSAP1|SPDL1|CEP55|NDC1|HECW2|CENPK|NCAPG|DSN1|HASPIN|SGO1	-17.253	0	3	0	0	-32.0667	12.3051
1	-14.1355	GO:0045786	M1	1	0	GO Biological Processes	19	negative regulation of cell cycle	-14.1355	3.36379	9.72144	24155	642	604	54	8.9404	1.16097	274|672|699|701|891|1033|1063|1956|2124|2146|2305|2956|3014|3976|4085|5111|5701|5708|5718|5743|5932|6241|6664|7027|7756|8091|8318|8379|8914|9125|9126|9184|9232|9319|9555|9735|10197|10457|11130|23468|23512|26255|27429|28227|29980|51512|51514|54888|54908|54962|55055|55771|79968|144455	BIN1|BRCA1|BUB1|BUB1B|CCNB1|CDKN3|CENPF|EGFR|EVI2B|EZH2|FOXM1|MSH6|H2AX|LIF|MAD2L1|PCNA|PSMC2|PSMD2|PSMD12|PTGS2|RBBP8|RRM2|SOX11|TFDP1|ZNF207|HMGA2|CDC45|MAD1L1|TIMELESS|CNOT9|SMC3|BUB3|PTTG1|TRIP13|MACROH2A1|KNTC1|PSME3|GPNMB|ZWINT|CBX5|SUZ12|PTTG3P|HTRA2|PPP2R3B|DONSON|GTSE1|DTL|NSUN2|SPDL1|TIPIN|ZWILCH|PRR11|WDR76|E2F7	-11.6038	0	3	0	0	-32.0667	12.3051
1	-13.3544	GO:0051783	M1	1	0	GO Biological Processes	19	regulation of nuclear division	-13.3544	5.89352	10.8447	24155	190	604	28	4.63576	0.855529	699|701|891|1063|2827|3832|3976|4085|4288|5902|7039|7756|8379|9088|9126|9184|9232|9319|9555|9735|9787|10460|23636|26255|51203|54443|54908|57520	BUB1|BUB1B|CCNB1|CENPF|GPR3|KIF11|LIF|MAD2L1|MKI67|RANBP1|TGFA|ZNF207|MAD1L1|PKMYT1|SMC3|BUB3|PTTG1|TRIP13|MACROH2A1|KNTC1|DLGAP5|TACC3|NUP62|PTTG3P|NUSAP1|ANLN|SPDL1|HECW2	-10.8629	0	3	0	0	-32.0667	12.3051
1	-13.0822	GO:0007088	M1	1	0	GO Biological Processes	19	regulation of mitotic nuclear division	-13.0822	6.26376	10.8981	24155	166	604	26	4.30464	0.825839	699|701|891|1063|3832|4085|4288|5902|7039|7756|8379|9088|9126|9184|9232|9319|9555|9735|9787|10460|23636|26255|51203|54443|54908|57520	BUB1|BUB1B|CCNB1|CENPF|KIF11|MAD2L1|MKI67|RANBP1|TGFA|ZNF207|MAD1L1|PKMYT1|SMC3|BUB3|PTTG1|TRIP13|MACROH2A1|KNTC1|DLGAP5|TACC3|NUP62|PTTG3P|NUSAP1|ANLN|SPDL1|HECW2	-10.6279	0	3	0	0	-32.0667	12.3051
1	-12.7435	GO:0000075	M1	1	0	GO Biological Processes	19	cell cycle checkpoint	-12.7435	5.36926	10.3298	24155	216	604	29	4.80132	0.869916	672|699|701|891|1063|3014|4085|5111|6664|7027|7756|8091|8318|8379|8914|9125|9184|9319|9735|11130|29980|51512|51514|54888|54908|54962|55055|79968|144455	BRCA1|BUB1|BUB1B|CCNB1|CENPF|H2AX|MAD2L1|PCNA|SOX11|TFDP1|ZNF207|HMGA2|CDC45|MAD1L1|TIMELESS|CNOT9|BUB3|TRIP13|KNTC1|ZWINT|DONSON|GTSE1|DTL|NSUN2|SPDL1|TIPIN|ZWILCH|WDR76|E2F7	-10.3125	0	3	0	0	-32.0667	12.3051
1	-12.0004	GO:0051983	M1	1	0	GO Biological Processes	19	regulation of chromosome segregation	-12.0004	7.76538	11.019	24155	103	604	20	3.31126	0.728058	699|701|891|1063|2237|4085|4288|7756|8379|9184|9232|9319|9555|9787|10460|10615|26255|29127|54908|57520	BUB1|BUB1B|CCNB1|CENPF|FEN1|MAD2L1|MKI67|ZNF207|MAD1L1|BUB3|PTTG1|TRIP13|MACROH2A1|DLGAP5|TACC3|SPAG5|PTTG3P|RACGAP1|SPDL1|HECW2	-9.59664	0	3	0	0	-32.0667	12.3051
1	-11.9842	GO:0051306	M1	1	0	GO Biological Processes	19	mitotic sister chromatid separation	-11.9842	10.6645	12.0032	24155	60	604	16	2.64901	0.653421	699|701|891|1063|4085|7756|8379|9184|9232|9319|9787|10460|26255|29781|54908|57520	BUB1|BUB1B|CCNB1|CENPF|MAD2L1|ZNF207|MAD1L1|BUB3|PTTG1|TRIP13|DLGAP5|TACC3|PTTG3P|NCAPH2|SPDL1|HECW2	-9.58573	0	3	0	0	-32.0667	12.3051
1	-11.6888	GO:0010948	M1	1	0	GO Biological Processes	19	negative regulation of cell cycle process	-11.6888	3.98809	9.16057	24155	361	604	36	5.96026	0.963319	672|699|701|891|1063|2124|2146|2956|3976|4085|5111|5701|5708|5718|5932|6241|7027|7756|8091|8379|9125|9126|9184|9232|9319|9555|10197|10457|23468|23512|26255|29980|51512|51514|54908|144455	BRCA1|BUB1|BUB1B|CCNB1|CENPF|EVI2B|EZH2|MSH6|LIF|MAD2L1|PCNA|PSMC2|PSMD2|PSMD12|RBBP8|RRM2|TFDP1|ZNF207|HMGA2|MAD1L1|CNOT9|SMC3|BUB3|PTTG1|TRIP13|MACROH2A1|PSME3|GPNMB|CBX5|SUZ12|PTTG3P|DONSON|GTSE1|DTL|SPDL1|E2F7	-9.30069	0	3	0	0	-32.0667	12.3051
1	-11.1818	GO:0010965	M1	1	0	GO Biological Processes	19	regulation of mitotic sister chromatid separation	-11.1818	10.5241	11.5287	24155	57	604	15	2.48344	0.63321	699|701|891|1063|4085|7756|8379|9184|9232|9319|9787|10460|26255|54908|57520	BUB1|BUB1B|CCNB1|CENPF|MAD2L1|ZNF207|MAD1L1|BUB3|PTTG1|TRIP13|DLGAP5|TACC3|PTTG3P|SPDL1|HECW2	-8.84198	0	3	0	0	-32.0667	12.3051
1	-11.092	GO:0051304	M1	1	0	GO Biological Processes	19	chromosome separation	-11.092	7.99834	10.652	24155	90	604	18	2.98013	0.691878	699|701|891|1063|4085|7756|8379|9184|9232|9319|9787|9918|10460|23310|26255|29781|54908|57520	BUB1|BUB1B|CCNB1|CENPF|MAD2L1|ZNF207|MAD1L1|BUB3|PTTG1|TRIP13|DLGAP5|NCAPD2|TACC3|NCAPD3|PTTG3P|NCAPH2|SPDL1|HECW2	-8.76125	0	3	0	0	-32.0667	12.3051
1	-11.0724	GO:0033047	M1	1	0	GO Biological Processes	19	regulation of mitotic sister chromatid segregation	-11.0724	9.40982	11.1214	24155	68	604	16	2.64901	0.653421	699|701|891|1063|4085|7756|8379|9184|9232|9319|9555|9787|10460|26255|54908|57520	BUB1|BUB1B|CCNB1|CENPF|MAD2L1|ZNF207|MAD1L1|BUB3|PTTG1|TRIP13|MACROH2A1|DLGAP5|TACC3|PTTG3P|SPDL1|HECW2	-8.74655	0	3	0	0	-32.0667	12.3051
1	-10.9583	GO:0033045	M1	1	0	GO Biological Processes	19	regulation of sister chromatid segregation	-10.9583	8.49824	10.758	24155	80	604	17	2.81457	0.672958	699|701|891|1063|2237|4085|7756|8379|9184|9232|9319|9555|9787|10460|26255|54908|57520	BUB1|BUB1B|CCNB1|CENPF|FEN1|MAD2L1|ZNF207|MAD1L1|BUB3|PTTG1|TRIP13|MACROH2A1|DLGAP5|TACC3|PTTG3P|SPDL1|HECW2	-8.64076	0	3	0	0	-32.0667	12.3051
1	-10.6068	GO:1905818	M1	1	0	GO Biological Processes	19	regulation of chromosome separation	-10.6068	9.67542	10.9534	24155	62	604	15	2.48344	0.63321	699|701|891|1063|4085|7756|8379|9184|9232|9319|9787|10460|26255|54908|57520	BUB1|BUB1B|CCNB1|CENPF|MAD2L1|ZNF207|MAD1L1|BUB3|PTTG1|TRIP13|DLGAP5|TACC3|PTTG3P|SPDL1|HECW2	-8.31452	0	3	0	0	-32.0667	12.3051
1	-10.277	GO:0033044	M1	1	0	GO Biological Processes	19	regulation of chromosome organization	-10.277	3.8253	8.46451	24155	345	604	33	5.46358	0.92474	672|699|701|891|1063|1786|2237|3159|3178|3181|3184|3976|4000|4085|4171|4288|4602|7756|8318|8379|9184|9232|9319|9555|9787|10460|26097|26255|51750|54908|57520|140609|201163	BRCA1|BUB1|BUB1B|CCNB1|CENPF|DNMT1|FEN1|HMGA1|HNRNPA1|HNRNPA2B1|HNRNPD|LIF|LMNA|MAD2L1|MCM2|MKI67|MYB|ZNF207|CDC45|MAD1L1|BUB3|PTTG1|TRIP13|MACROH2A1|DLGAP5|TACC3|CHTOP|PTTG3P|RTEL1|SPDL1|HECW2|NEK7|FLCN	-7.9929	0	3	0	0	-32.0667	12.3051
1	-9.94604	GO:2000816	M1	1	0	GO Biological Processes	19	negative regulation of mitotic sister chromatid separation	-9.94604	12.3051	11.3152	24155	39	604	12	1.98675	0.567801	699|701|891|1063|4085|7756|8379|9184|9232|9319|26255|54908	BUB1|BUB1B|CCNB1|CENPF|MAD2L1|ZNF207|MAD1L1|BUB3|PTTG1|TRIP13|PTTG3P|SPDL1	-7.70039	0	3	0	0	-32.0667	12.3051
1	-9.80106	GO:1905819	M1	1	0	GO Biological Processes	19	negative regulation of chromosome separation	-9.80106	11.9975	11.1478	24155	40	604	12	1.98675	0.567801	699|701|891|1063|4085|7756|8379|9184|9232|9319|26255|54908	BUB1|BUB1B|CCNB1|CENPF|MAD2L1|ZNF207|MAD1L1|BUB3|PTTG1|TRIP13|PTTG3P|SPDL1	-7.56988	0	3	0	0	-32.0667	12.3051
1	-9.75809	GO:0007093	M1	1	0	GO Biological Processes	19	mitotic cell cycle checkpoint	-9.75809	5.33223	8.94225	24155	165	604	22	3.64238	0.762285	672|699|701|891|1063|4085|5111|7027|7756|8091|8379|9125|9184|9319|9735|11130|29980|51512|54908|54962|55055|144455	BRCA1|BUB1|BUB1B|CCNB1|CENPF|MAD2L1|PCNA|TFDP1|ZNF207|HMGA2|MAD1L1|CNOT9|BUB3|TRIP13|KNTC1|ZWINT|DONSON|GTSE1|SPDL1|TIPIN|ZWILCH|E2F7	-7.53308	0	3	0	0	-32.0667	12.3051
1	-9.52437	GO:0033048	M1	1	0	GO Biological Processes	19	negative regulation of mitotic sister chromatid segregation	-9.52437	11.4262	10.8301	24155	42	604	12	1.98675	0.567801	699|701|891|1063|4085|7756|8379|9184|9232|9319|26255|54908	BUB1|BUB1B|CCNB1|CENPF|MAD2L1|ZNF207|MAD1L1|BUB3|PTTG1|TRIP13|PTTG3P|SPDL1	-7.31742	0	3	0	0	-32.0667	12.3051
1	-9.26378	GO:0033046	M1	1	0	GO Biological Processes	19	negative regulation of sister chromatid segregation	-9.26378	10.9068	10.5332	24155	44	604	12	1.98675	0.567801	699|701|891|1063|4085|7756|8379|9184|9232|9319|26255|54908	BUB1|BUB1B|CCNB1|CENPF|MAD2L1|ZNF207|MAD1L1|BUB3|PTTG1|TRIP13|PTTG3P|SPDL1	-7.07334	0	3	0	0	-32.0667	12.3051
1	-9.2448	GO:0007091	M1	1	0	GO Biological Processes	19	metaphase/anaphase transition of mitotic cell cycle	-9.2448	9.62764	10.1643	24155	54	604	13	2.15232	0.590487	699|701|891|1063|4085|7756|8379|9184|9319|9787|10460|54908|57520	BUB1|BUB1B|CCNB1|CENPF|MAD2L1|ZNF207|MAD1L1|BUB3|TRIP13|DLGAP5|TACC3|SPDL1|HECW2	-7.05759	0	3	0	0	-32.0667	12.3051
1	-9.23778	GO:0045930	M1	1	0	GO Biological Processes	19	negative regulation of mitotic cell cycle	-9.23778	3.66788	7.91024	24155	338	604	31	5.13245	0.897848	672|699|701|891|1063|1956|2146|4085|5111|5701|5708|5718|7027|7756|8091|8379|9125|9184|9232|9319|9735|10197|10457|11130|26255|29980|51512|54908|54962|55055|144455	BRCA1|BUB1|BUB1B|CCNB1|CENPF|EGFR|EZH2|MAD2L1|PCNA|PSMC2|PSMD2|PSMD12|TFDP1|ZNF207|HMGA2|MAD1L1|CNOT9|BUB3|PTTG1|TRIP13|KNTC1|PSME3|GPNMB|ZWINT|PTTG3P|DONSON|GTSE1|SPDL1|TIPIN|ZWILCH|E2F7	-7.05378	0	3	0	0	-32.0667	12.3051
1	-9.13899	GO:0051985	M1	1	0	GO Biological Processes	19	negative regulation of chromosome segregation	-9.13899	10.6645	10.3919	24155	45	604	12	1.98675	0.567801	699|701|891|1063|4085|7756|8379|9184|9232|9319|26255|54908	BUB1|BUB1B|CCNB1|CENPF|MAD2L1|ZNF207|MAD1L1|BUB3|PTTG1|TRIP13|PTTG3P|SPDL1	-6.96133	0	3	0	0	-32.0667	12.3051
1	-9.03287	GO:0044784	M1	1	0	GO Biological Processes	19	metaphase/anaphase transition of cell cycle	-9.03287	9.28379	9.93876	24155	56	604	13	2.15232	0.590487	699|701|891|1063|4085|7756|8379|9184|9319|9787|10460|54908|57520	BUB1|BUB1B|CCNB1|CENPF|MAD2L1|ZNF207|MAD1L1|BUB3|TRIP13|DLGAP5|TACC3|SPDL1|HECW2	-6.86145	0	3	0	0	-32.0667	12.3051
1	-8.63587	GO:0051784	M1	1	0	GO Biological Processes	19	negative regulation of nuclear division	-8.63587	8.66487	9.51975	24155	60	604	13	2.15232	0.590487	699|701|891|1063|3976|4085|7756|8379|9184|9232|9319|26255|54908	BUB1|BUB1B|CCNB1|CENPF|LIF|MAD2L1|ZNF207|MAD1L1|BUB3|PTTG1|TRIP13|PTTG3P|SPDL1	-6.4973	0	3	0	0	-32.0667	12.3051
1	-8.45649	GO:0030071	M1	1	0	GO Biological Processes	19	regulation of mitotic metaphase/anaphase transition	-8.45649	9.40982	9.62798	24155	51	604	12	1.98675	0.567801	699|701|891|1063|4085|7756|8379|9184|9319|9787|54908|57520	BUB1|BUB1B|CCNB1|CENPF|MAD2L1|ZNF207|MAD1L1|BUB3|TRIP13|DLGAP5|SPDL1|HECW2	-6.33207	0	3	0	0	-32.0667	12.3051
1	-8.38839	GO:1901988	M1	1	0	GO Biological Processes	19	negative regulation of cell cycle phase transition	-8.38839	3.89432	7.6159	24155	267	604	26	4.30464	0.825839	672|699|701|891|1063|2146|4085|5111|5701|5708|5718|7027|7756|8091|8379|9125|9184|9319|9555|10197|10457|29980|51512|51514|54908|144455	BRCA1|BUB1|BUB1B|CCNB1|CENPF|EZH2|MAD2L1|PCNA|PSMC2|PSMD2|PSMD12|TFDP1|ZNF207|HMGA2|MAD1L1|CNOT9|BUB3|TRIP13|MACROH2A1|PSME3|GPNMB|DONSON|GTSE1|DTL|SPDL1|E2F7	-6.27225	0	3	0	0	-32.0667	12.3051
1	-8.35244	GO:0045839	M1	1	0	GO Biological Processes	19	negative regulation of mitotic nuclear division	-8.35244	9.22886	9.51292	24155	52	604	12	1.98675	0.567801	699|701|891|1063|4085|7756|8379|9184|9232|9319|26255|54908	BUB1|BUB1B|CCNB1|CENPF|MAD2L1|ZNF207|MAD1L1|BUB3|PTTG1|TRIP13|PTTG3P|SPDL1	-6.24442	0	3	0	0	-32.0667	12.3051
1	-8.33534	GO:2001251	M1	1	0	GO Biological Processes	19	negative regulation of chromosome organization	-8.33534	5.2044	8.16022	24155	146	604	19	3.1457	0.710231	672|699|701|891|1063|1786|3159|3178|4085|4171|7756|8379|9184|9232|9319|9555|26255|51750|54908	BRCA1|BUB1|BUB1B|CCNB1|CENPF|DNMT1|HMGA1|HNRNPA1|MAD2L1|MCM2|ZNF207|MAD1L1|BUB3|PTTG1|TRIP13|MACROH2A1|PTTG3P|RTEL1|SPDL1	-6.23224	0	3	0	0	-32.0667	12.3051
1	-8.25085	GO:1902099	M1	1	0	GO Biological Processes	19	regulation of metaphase/anaphase transition of cell cycle	-8.25085	9.05473	9.40093	24155	53	604	12	1.98675	0.567801	699|701|891|1063|4085|7756|8379|9184|9319|9787|54908|57520	BUB1|BUB1B|CCNB1|CENPF|MAD2L1|ZNF207|MAD1L1|BUB3|TRIP13|DLGAP5|SPDL1|HECW2	-6.15603	0	3	0	0	-32.0667	12.3051
1	-8.16905	GO:0007094	M1	1	0	GO Biological Processes	19	mitotic spindle assembly checkpoint	-8.16905	11.7623	10.0567	24155	34	604	10	1.65563	0.519204	699|701|891|1063|4085|7756|8379|9184|9319|54908	BUB1|BUB1B|CCNB1|CENPF|MAD2L1|ZNF207|MAD1L1|BUB3|TRIP13|SPDL1	-6.08704	0	3	0	0	-32.0667	12.3051
1	-8.16905	GO:0031577	M1	1	0	GO Biological Processes	19	spindle checkpoint	-8.16905	11.7623	10.0567	24155	34	604	10	1.65563	0.519204	699|701|891|1063|4085|7756|8379|9184|9319|54908	BUB1|BUB1B|CCNB1|CENPF|MAD2L1|ZNF207|MAD1L1|BUB3|TRIP13|SPDL1	-6.08704	0	3	0	0	-32.0667	12.3051
1	-8.16905	GO:0071173	M1	1	0	GO Biological Processes	19	spindle assembly checkpoint	-8.16905	11.7623	10.0567	24155	34	604	10	1.65563	0.519204	699|701|891|1063|4085|7756|8379|9184|9319|54908	BUB1|BUB1B|CCNB1|CENPF|MAD2L1|ZNF207|MAD1L1|BUB3|TRIP13|SPDL1	-6.08704	0	3	0	0	-32.0667	12.3051
1	-8.16905	GO:0071174	M1	1	0	GO Biological Processes	19	mitotic spindle checkpoint	-8.16905	11.7623	10.0567	24155	34	604	10	1.65563	0.519204	699|701|891|1063|4085|7756|8379|9184|9319|54908	BUB1|BUB1B|CCNB1|CENPF|MAD2L1|ZNF207|MAD1L1|BUB3|TRIP13|SPDL1	-6.08704	0	3	0	0	-32.0667	12.3051
1	-7.90116	GO:0045841	M1	1	0	GO Biological Processes	19	negative regulation of mitotic metaphase/anaphase transition	-7.90116	11.1088	9.72031	24155	36	604	10	1.65563	0.519204	699|701|891|1063|4085|7756|8379|9184|9319|54908	BUB1|BUB1B|CCNB1|CENPF|MAD2L1|ZNF207|MAD1L1|BUB3|TRIP13|SPDL1	-5.8413	0	3	0	0	-32.0667	12.3051
1	-7.7741	GO:1902100	M1	1	0	GO Biological Processes	19	negative regulation of metaphase/anaphase transition of cell cycle	-7.7741	10.8086	9.5619	24155	37	604	10	1.65563	0.519204	699|701|891|1063|4085|7756|8379|9184|9319|54908	BUB1|BUB1B|CCNB1|CENPF|MAD2L1|ZNF207|MAD1L1|BUB3|TRIP13|SPDL1	-5.71663	0	3	0	0	-32.0667	12.3051
1	-7.73859	GO:1901991	M1	1	0	GO Biological Processes	19	negative regulation of mitotic cell cycle phase transition	-7.73859	3.87017	7.27577	24155	248	604	24	3.97351	0.794812	672|699|701|891|1063|2146|4085|5111|5701|5708|5718|7027|7756|8091|8379|9125|9184|9319|10197|10457|29980|51512|54908|144455	BRCA1|BUB1|BUB1B|CCNB1|CENPF|EZH2|MAD2L1|PCNA|PSMC2|PSMD2|PSMD12|TFDP1|ZNF207|HMGA2|MAD1L1|CNOT9|BUB3|TRIP13|PSME3|GPNMB|DONSON|GTSE1|SPDL1|E2F7	-5.69521	0	3	0	0	-32.0667	12.3051
1	-7.62653	GO:0010639	M1	1	0	GO Biological Processes	19	negative regulation of organelle organization	-7.62653	3.13859	6.86296	24155	395	604	31	5.13245	0.897848	120|672|699|701|891|1063|1786|3082|3159|3178|3925|3976|4000|4085|4171|7756|8379|9184|9232|9319|9353|9555|9738|11013|26255|26586|27429|51750|54908|84260|201163	ADD3|BRCA1|BUB1|BUB1B|CCNB1|CENPF|DNMT1|HGF|HMGA1|HNRNPA1|STMN1|LIF|LMNA|MAD2L1|MCM2|ZNF207|MAD1L1|BUB3|PTTG1|TRIP13|SLIT2|MACROH2A1|CCP110|TMSB15A|PTTG3P|CKAP2|HTRA2|RTEL1|SPDL1|TCHP|FLCN	-5.59902	0	3	0	0	-32.0667	12.3051
1	-3.84538	GO:0051129	M1	1	0	GO Biological Processes	19	negative regulation of cellular component organization	-3.84538	1.93249	4.14026	24155	745	604	36	5.96026	0.963319	120|672|699|701|891|1063|1786|2048|3082|3159|3178|3925|3976|4000|4085|4171|7756|8379|9184|9232|9319|9353|9555|9738|9912|9928|10253|10371|11013|26255|26586|27429|51750|54908|84260|201163	ADD3|BRCA1|BUB1|BUB1B|CCNB1|CENPF|DNMT1|EPHB2|HGF|HMGA1|HNRNPA1|STMN1|LIF|LMNA|MAD2L1|MCM2|ZNF207|MAD1L1|BUB3|PTTG1|TRIP13|SLIT2|MACROH2A1|CCP110|ARHGAP44|KIF14|SPRY2|SEMA3A|TMSB15A|PTTG3P|CKAP2|HTRA2|RTEL1|SPDL1|TCHP|FLCN	-2.19715	0	3	0	0	-32.0667	12.3051
1	-29.3388	R-HSA-69620	M1	1	0	Reactome Gene Sets	6	Cell Cycle Checkpoints	-29.3388	7.234	17.1931	24155	293	604	53	8.77483	1.15122	332|672|699|701|891|993|1063|3014|4085|4171|4172|4173|4174|4175|4176|5515|5701|5708|5718|5932|5982|5983|5984|5985|6117|7468|7534|8318|8364|8379|9088|9156|9184|9735|9793|10197|10971|11130|23594|51512|54821|54908|55055|55388|55839|57405|64105|64946|79019|79682|79980|151648|220134	BIRC5|BRCA1|BUB1|BUB1B|CCNB1|CDC25A|CENPF|H2AX|MAD2L1|MCM2|MCM3|MCM4|MCM5|MCM6|MCM7|PPP2CA|PSMC2|PSMD2|PSMD12|RBBP8|RFC2|RFC3|RFC4|RFC5|RPA1|NSD2|YWHAZ|CDC45|H4C3|MAD1L1|PKMYT1|EXO1|BUB3|KNTC1|CKAP5|PSME3|YWHAQ|ZWINT|ORC6|GTSE1|ERCC6L|SPDL1|ZWILCH|MCM10|CENPN|SPC25|CENPK|CENPH|CENPM|CENPU|DSN1|SGO1|SKA1	-25.8664	0	4	1	1	-29.3388	39.9917
1	-28.6983	GO:0006260	M1	1	0	GO Biological Processes	19	DNA replication	-28.6983	7.38977	17.0978	24155	276	604	51	8.44371	1.13134	672|1956|2237|2956|3159|3978|4171|4172|4173|4174|4175|4176|4678|5111|5422|5424|5426|5427|5515|5557|5932|5982|5983|5984|5985|6117|6240|6241|8208|8318|8914|9126|9156|9401|9768|10036|10535|10714|10721|11169|23594|23649|29980|51514|51659|51750|54962|55388|63922|64710|144455	BRCA1|EGFR|FEN1|MSH6|HMGA1|LIG1|MCM2|MCM3|MCM4|MCM5|MCM6|MCM7|NASP|PCNA|POLA1|POLD1|POLE|POLE2|PPP2CA|PRIM1|RBBP8|RFC2|RFC3|RFC4|RFC5|RPA1|RRM1|RRM2|CHAF1B|CDC45|TIMELESS|SMC3|EXO1|RECQL4|PCLAF|CHAF1A|RNASEH2A|POLD3|POLQ|WDHD1|ORC6|POLA2|DONSON|DTL|GINS2|RTEL1|TIPIN|MCM10|CHTF18|NUCKS1|E2F7	-25.2838	0	4	0	0	-29.3388	39.9917
1	-27.4496	GO:0006261	M1	1	0	GO Biological Processes	19	DNA-dependent DNA replication	-27.4496	10.1278	18.1978	24155	154	604	39	6.45695	1	2237|2956|3159|3978|4171|4172|4173|4174|4175|4176|5111|5422|5424|5426|5427|5557|5982|5983|5984|5985|6117|8318|8914|9126|9401|10535|10714|10721|11169|23594|23649|29980|51659|51750|54962|55388|63922|64710|144455	FEN1|MSH6|HMGA1|LIG1|MCM2|MCM3|MCM4|MCM5|MCM6|MCM7|PCNA|POLA1|POLD1|POLE|POLE2|PRIM1|RFC2|RFC3|RFC4|RFC5|RPA1|CDC45|TIMELESS|SMC3|RECQL4|RNASEH2A|POLD3|POLQ|WDHD1|ORC6|POLA2|DONSON|GINS2|RTEL1|TIPIN|MCM10|CHTF18|NUCKS1|E2F7	-24.0863	0	4	0	0	-29.3388	39.9917
1	-25.9698	hsa03030	M1	1	0	KEGG Pathway	24	DNA replication	-25.9698	24.4394	22.5386	24155	36	604	22	3.64238	0.762285	2237|3978|4171|4172|4173|4174|4175|4176|5111|5422|5424|5426|5427|5557|5982|5983|5984|5985|6117|10535|10714|23649	FEN1|LIG1|MCM2|MCM3|MCM4|MCM5|MCM6|MCM7|PCNA|POLA1|POLD1|POLE|POLE2|PRIM1|RFC2|RFC3|RFC4|RFC5|RPA1|RNASEH2A|POLD3|POLA2	-22.7984	0	4	0	0	-29.3388	39.9917
1	-25.7911	R-HSA-69190	M1	1	0	Reactome Gene Sets	6	DNA strand elongation	-25.7911	26.2446	22.8842	24155	32	604	21	3.47682	0.745399	2237|3978|4171|4172|4173|4174|4175|4176|5111|5422|5424|5557|5982|5983|5984|5985|6117|8318|10714|23649|51659	FEN1|LIG1|MCM2|MCM3|MCM4|MCM5|MCM6|MCM7|PCNA|POLA1|POLD1|PRIM1|RFC2|RFC3|RFC4|RFC5|RPA1|CDC45|POLD3|POLA2|GINS2	-22.6496	0	4	0	0	-29.3388	39.9917
1	-25.6919	GO:0044786	M1	1	0	GO Biological Processes	19	cell cycle DNA replication	-25.6919	15.5523	19.804	24155	72	604	28	4.63576	0.855529	2237|2956|3978|4171|4172|4173|4174|4175|4176|5111|5422|5424|5426|5427|5557|5982|5983|5984|5985|6117|8318|9126|10714|23649|29980|51750|54962|144455	FEN1|MSH6|LIG1|MCM2|MCM3|MCM4|MCM5|MCM6|MCM7|PCNA|POLA1|POLD1|POLE|POLE2|PRIM1|RFC2|RFC3|RFC4|RFC5|RPA1|CDC45|SMC3|POLD3|POLA2|DONSON|RTEL1|TIPIN|E2F7	-22.5784	0	4	0	0	-29.3388	39.9917
1	-23.6832	GO:0033260	M1	1	0	GO Biological Processes	19	nuclear DNA replication	-23.6832	16.39	19.2734	24155	61	604	25	4.13907	0.810502	2237|3978|4171|4172|4173|4174|4175|4176|5111|5422|5424|5426|5427|5557|5982|5983|5984|5985|6117|8318|10714|23649|29980|51750|54962	FEN1|LIG1|MCM2|MCM3|MCM4|MCM5|MCM6|MCM7|PCNA|POLA1|POLD1|POLE|POLE2|PRIM1|RFC2|RFC3|RFC4|RFC5|RPA1|CDC45|POLD3|POLA2|DONSON|RTEL1|TIPIN	-20.6667	0	4	0	0	-29.3388	39.9917
1	-23.3283	GO:0071103	M1	1	0	GO Biological Processes	19	DNA conformation change	-23.3283	5.99264	14.5569	24155	327	604	49	8.11258	1.11094	891|2963|3014|3070|3159|3181|4171|4172|4173|4174|4175|4176|4678|5982|5983|5984|5985|6117|8091|8208|8318|8364|8438|8815|9401|9555|9918|10036|10051|10592|10721|11339|23310|25788|29781|51203|51659|51750|54069|54821|55723|55839|63922|64105|64151|64946|79019|79682|387103	CCNB1|GTF2F2|H2AX|HELLS|HMGA1|HNRNPA2B1|MCM2|MCM3|MCM4|MCM5|MCM6|MCM7|NASP|RFC2|RFC3|RFC4|RFC5|RPA1|HMGA2|CHAF1B|CDC45|H4C3|RAD54L|BANF1|RECQL4|MACROH2A1|NCAPD2|CHAF1A|SMC4|SMC2|POLQ|OIP5|NCAPD3|RAD54B|NCAPH2|NUSAP1|GINS2|RTEL1|MIS18A|ERCC6L|ASF1B|CENPN|CHTF18|CENPK|NCAPG|CENPH|CENPM|CENPU|CENPW	-20.3532	0	4	0	0	-29.3388	39.9917
1	-23.2428	GO:0006281	M1	1	0	GO Biological Processes	19	DNA repair	-23.2428	4.55602	13.5475	24155	553	604	63	10.4305	1.24369	86|672|1956|2177|2237|2305|2956|3014|3150|3159|3978|4171|4172|4173|4174|4175|4176|5111|5422|5424|5426|5427|5886|5932|5982|5983|5984|5985|6117|7468|8091|8208|8318|8364|8438|8533|8914|9126|9156|9232|9319|9401|9768|10036|10535|10635|10714|10721|11169|25788|29089|29128|51514|51659|51750|55215|55247|55339|64710|79000|79447|125476|252969	ACTL6A|BRCA1|EGFR|FANCD2|FEN1|FOXM1|MSH6|H2AX|HMGN1|HMGA1|LIG1|MCM2|MCM3|MCM4|MCM5|MCM6|MCM7|PCNA|POLA1|POLD1|POLE|POLE2|RAD23A|RBBP8|RFC2|RFC3|RFC4|RFC5|RPA1|NSD2|HMGA2|CHAF1B|CDC45|H4C3|RAD54L|COPS3|TIMELESS|SMC3|EXO1|PTTG1|TRIP13|RECQL4|PCLAF|CHAF1A|RNASEH2A|RAD51AP1|POLD3|POLQ|WDHD1|RAD54B|UBE2T|UHRF1|DTL|GINS2|RTEL1|FANCI|NEIL3|WDR33|NUCKS1|AUNIP|PAGR1|INO80C|NEIL2	-20.287	0	4	0	0	-29.3388	39.9917
1	-20.1804	R-HSA-69242	M1	1	0	Reactome Gene Sets	6	S Phase	-20.1804	8.19706	14.6732	24155	161	604	33	5.46358	0.92474	993|994|1163|2237|3978|4171|4172|4173|4174|4175|4176|5111|5422|5424|5426|5427|5557|5701|5708|5718|5982|5983|5984|5985|6117|7027|8318|9126|10197|10714|23594|23649|51659	CDC25A|CDC25B|CKS1B|FEN1|LIG1|MCM2|MCM3|MCM4|MCM5|MCM6|MCM7|PCNA|POLA1|POLD1|POLE|POLE2|PRIM1|PSMC2|PSMD2|PSMD12|RFC2|RFC3|RFC4|RFC5|RPA1|TFDP1|CDC45|SMC3|PSME3|POLD3|ORC6|POLA2|GINS2	-17.31	0	4	0	0	-29.3388	39.9917
1	-19.181	R-HSA-69306	M1	1	0	Reactome Gene Sets	6	DNA Replication	-19.181	9.13197	14.7146	24155	127	604	29	4.80132	0.869916	2237|3978|4171|4172|4173|4174|4175|4176|5111|5422|5424|5426|5427|5557|5701|5708|5718|5982|5983|5984|5985|6117|8318|10197|10714|23594|23649|51659|55388	FEN1|LIG1|MCM2|MCM3|MCM4|MCM5|MCM6|MCM7|PCNA|POLA1|POLD1|POLE|POLE2|PRIM1|PSMC2|PSMD2|PSMD12|RFC2|RFC3|RFC4|RFC5|RPA1|CDC45|PSME3|POLD3|ORC6|POLA2|GINS2|MCM10	-16.3406	0	4	0	0	-29.3388	39.9917
1	-18.9154	R-HSA-69239	M1	1	0	Reactome Gene Sets	6	Synthesis of DNA	-18.9154	9.40982	14.7278	24155	119	604	28	4.63576	0.855529	2237|3978|4171|4172|4173|4174|4175|4176|5111|5422|5424|5426|5427|5557|5701|5708|5718|5982|5983|5984|5985|6117|8318|10197|10714|23594|23649|51659	FEN1|LIG1|MCM2|MCM3|MCM4|MCM5|MCM6|MCM7|PCNA|POLA1|POLD1|POLE|POLE2|PRIM1|PSMC2|PSMD2|PSMD12|RFC2|RFC3|RFC4|RFC5|RPA1|CDC45|PSME3|POLD3|ORC6|POLA2|GINS2	-16.0892	0	4	0	0	-29.3388	39.9917
1	-18.7811	R-HSA-69206	M1	1	0	Reactome Gene Sets	6	G1/S Transition	-18.7811	8.85313	14.4332	24155	131	604	29	4.80132	0.869916	891|993|1163|1719|4171|4172|4173|4174|4175|4176|5111|5422|5426|5427|5515|5557|5701|5708|5718|6117|6241|7027|7298|8318|10197|23594|23649|28227|55388	CCNB1|CDC25A|CKS1B|DHFR|MCM2|MCM3|MCM4|MCM5|MCM6|MCM7|PCNA|POLA1|POLE|POLE2|PPP2CA|PRIM1|PSMC2|PSMD2|PSMD12|RPA1|RRM2|TFDP1|TYMS|CDC45|PSME3|ORC6|POLA2|PPP2R3B|MCM10	-15.9904	0	4	0	0	-29.3388	39.9917
1	-17.1532	R-HSA-453279	M1	1	0	Reactome Gene Sets	6	Mitotic G1-G1/S phases	-17.1532	7.78362	13.3016	24155	149	604	29	4.80132	0.869916	891|993|1163|1719|4171|4172|4173|4174|4175|4176|5111|5422|5426|5427|5515|5557|5701|5708|5718|6117|6241|7027|7298|8318|10197|23594|23649|28227|55388	CCNB1|CDC25A|CKS1B|DHFR|MCM2|MCM3|MCM4|MCM5|MCM6|MCM7|PCNA|POLA1|POLE|POLE2|PPP2CA|PRIM1|PSMC2|PSMD2|PSMD12|RPA1|RRM2|TFDP1|TYMS|CDC45|PSME3|ORC6|POLA2|PPP2R3B|MCM10	-14.4154	0	4	0	0	-29.3388	39.9917
1	-16.6279	R-HSA-69481	M1	1	0	Reactome Gene Sets	6	G2/M Checkpoints	-16.6279	7.14138	12.7921	24155	168	604	30	4.96689	0.884018	672|891|993|3014|4171|4172|4173|4174|4175|4176|5701|5708|5718|5932|5982|5983|5984|5985|6117|7468|7534|8318|8364|9088|9156|10197|10971|23594|51512|55388	BRCA1|CCNB1|CDC25A|H2AX|MCM2|MCM3|MCM4|MCM5|MCM6|MCM7|PSMC2|PSMD2|PSMD12|RBBP8|RFC2|RFC3|RFC4|RFC5|RPA1|NSD2|YWHAZ|CDC45|H4C3|PKMYT1|EXO1|PSME3|YWHAQ|ORC6|GTSE1|MCM10	-13.9336	0	4	0	0	-29.3388	39.9917
1	-16.0612	GO:0006271	M1	1	0	GO Biological Processes	19	DNA strand elongation involved in DNA replication	-16.0612	25.9946	17.908	24155	20	604	13	2.15232	0.590487	2237|3978|4172|4173|4176|5111|5422|5426|5983|5984|10535|10714|51659	FEN1|LIG1|MCM3|MCM4|MCM7|PCNA|POLA1|POLE|RFC3|RFC4|RNASEH2A|POLD3|GINS2	-13.4064	0	4	0	0	-29.3388	39.9917
1	-15.3198	GO:0022616	M1	1	0	GO Biological Processes	19	DNA strand elongation	-15.3198	20.7364	16.4323	24155	27	604	14	2.31788	0.612258	2237|3978|4172|4173|4176|5111|5422|5426|5983|5984|10535|10714|51659|64710	FEN1|LIG1|MCM3|MCM4|MCM7|PCNA|POLA1|POLE|RFC3|RFC4|RNASEH2A|POLD3|GINS2|NUCKS1	-12.7012	0	4	0	0	-29.3388	39.9917
1	-15.2687	R-HSA-68962	M1	1	0	Reactome Gene Sets	6	Activation of the pre-replicative complex	-15.2687	18.1781	15.8137	24155	33	604	15	2.48344	0.63321	4171|4172|4173|4174|4175|4176|5422|5426|5427|5557|6117|8318|23594|23649|55388	MCM2|MCM3|MCM4|MCM5|MCM6|MCM7|POLA1|POLE|POLE2|PRIM1|RPA1|CDC45|ORC6|POLA2|MCM10	-12.6588	0	4	0	0	-29.3388	39.9917
1	-14.3533	R-HSA-176187	M1	1	0	Reactome Gene Sets	6	Activation of ATR in response to replication stress	-14.3533	16.2129	14.8303	24155	37	604	15	2.48344	0.63321	993|4171|4172|4173|4174|4175|4176|5982|5983|5984|5985|6117|8318|23594|55388	CDC25A|MCM2|MCM3|MCM4|MCM5|MCM6|MCM7|RFC2|RFC3|RFC4|RFC5|RPA1|CDC45|ORC6|MCM10	-11.7839	0	4	0	0	-29.3388	39.9917
1	-14.3442	GO:0000082	M1	1	0	GO Biological Processes	19	G1/S transition of mitotic cell cycle	-14.3442	5.01688	10.8073	24155	279	604	35	5.7947	0.950681	891|993|1033|1719|1956|2146|4171|4172|4173|4174|4175|4176|4678|5111|5422|5426|5427|5557|5932|6117|6241|7027|7298|8318|9125|9928|10197|10457|10657|11040|23594|23649|51512|55388|144455	CCNB1|CDC25A|CDKN3|DHFR|EGFR|EZH2|MCM2|MCM3|MCM4|MCM5|MCM6|MCM7|NASP|PCNA|POLA1|POLE|POLE2|PRIM1|RBBP8|RPA1|RRM2|TFDP1|TYMS|CDC45|CNOT9|KIF14|PSME3|GPNMB|KHDRBS1|PIM2|ORC6|POLA2|GTSE1|MCM10|E2F7	-11.7825	0	4	0	0	-29.3388	39.9917
1	-14.2223	GO:0044843	M1	1	0	GO Biological Processes	19	cell cycle G1/S phase transition	-14.2223	4.83121	10.6572	24155	298	604	36	5.96026	0.963319	891|993|1033|1719|1956|2146|4171|4172|4173|4174|4175|4176|4678|5111|5422|5426|5427|5557|5932|6117|6241|7027|7298|8318|9125|9928|10197|10457|10657|11040|23594|23649|51512|55388|79447|144455	CCNB1|CDC25A|CDKN3|DHFR|EGFR|EZH2|MCM2|MCM3|MCM4|MCM5|MCM6|MCM7|NASP|PCNA|POLA1|POLE|POLE2|PRIM1|RBBP8|RPA1|RRM2|TFDP1|TYMS|CDC45|CNOT9|KIF14|PSME3|GPNMB|KHDRBS1|PIM2|ORC6|POLA2|GTSE1|MCM10|PAGR1|E2F7	-11.6829	0	4	0	0	-29.3388	39.9917
1	-13.6936	GO:0006310	M1	1	0	GO Biological Processes	19	DNA recombination	-13.6936	4.77717	10.4173	24155	293	604	35	5.7947	0.950681	86|672|2237|2956|3014|3978|4171|4172|4173|4174|4175|4176|5932|6117|6932|7468|8318|8438|8914|9156|9319|9401|10635|10721|23529|25788|29893|51659|51750|64710|79000|79447|84057|118460|125476	ACTL6A|BRCA1|FEN1|MSH6|H2AX|LIG1|MCM2|MCM3|MCM4|MCM5|MCM6|MCM7|RBBP8|RPA1|TCF7|NSD2|CDC45|RAD54L|TIMELESS|EXO1|TRIP13|RECQL4|RAD51AP1|POLQ|CLCF1|RAD54B|PSMC3IP|GINS2|RTEL1|NUCKS1|AUNIP|PAGR1|MND1|EXOSC6|INO80C	-11.1822	0	4	0	0	-29.3388	39.9917
1	-13.6607	GO:0032392	M1	1	0	GO Biological Processes	19	DNA geometric change	-13.6607	7.72949	11.7851	24155	119	604	23	3.80795	0.778747	2963|3159|3181|4171|4172|4173|4174|4175|4176|5982|5983|5984|5985|6117|8318|8438|9401|10721|25788|51659|51750|54821|63922	GTF2F2|HMGA1|HNRNPA2B1|MCM2|MCM3|MCM4|MCM5|MCM6|MCM7|RFC2|RFC3|RFC4|RFC5|RPA1|CDC45|RAD54L|RECQL4|POLQ|RAD54B|GINS2|RTEL1|ERCC6L|CHTF18	-11.156	0	4	0	0	-29.3388	39.9917
1	-13.2576	hsa04110	M1	1	0	KEGG Pathway	24	Cell cycle	-13.2576	7.41782	11.4742	24155	124	604	23	3.80795	0.778747	699|701|891|993|994|4085|4171|4172|4173|4174|4175|4176|5111|7027|7534|8318|8379|9088|9126|9184|9232|10971|23594	BUB1|BUB1B|CCNB1|CDC25A|CDC25B|MAD2L1|MCM2|MCM3|MCM4|MCM5|MCM6|MCM7|PCNA|TFDP1|YWHAZ|CDC45|MAD1L1|PKMYT1|SMC3|BUB3|PTTG1|YWHAQ|ORC6	-10.7726	0	4	0	0	-29.3388	39.9917
1	-12.9363	GO:0006270	M1	1	0	GO Biological Processes	19	DNA replication initiation	-12.9363	15.132	13.7766	24155	37	604	14	2.31788	0.612258	4171|4172|4173|4174|4175|4176|5422|5426|5427|5557|8318|23594|23649|55388	MCM2|MCM3|MCM4|MCM5|MCM6|MCM7|POLA1|POLE|POLE2|PRIM1|CDC45|ORC6|POLA2|MCM10	-10.488	0	4	0	0	-29.3388	39.9917
1	-12.597	R-HSA-69002	M1	1	0	Reactome Gene Sets	6	DNA Replication Pre-Initiation	-12.597	8.93933	11.7426	24155	85	604	19	3.1457	0.710231	4171|4172|4173|4174|4175|4176|5422|5426|5427|5557|5701|5708|5718|6117|8318|10197|23594|23649|55388	MCM2|MCM3|MCM4|MCM5|MCM6|MCM7|POLA1|POLE|POLE2|PRIM1|PSMC2|PSMD2|PSMD12|RPA1|CDC45|PSME3|ORC6|POLA2|MCM10	-10.1715	0	4	0	0	-29.3388	39.9917
1	-12.4167	GO:0032508	M1	1	0	GO Biological Processes	19	DNA duplex unwinding	-12.4167	7.63478	11.1691	24155	110	604	21	3.47682	0.745399	2963|3159|4171|4172|4173|4174|4175|4176|5982|5983|5984|5985|6117|8318|9401|10721|25788|51659|51750|54821|63922	GTF2F2|HMGA1|MCM2|MCM3|MCM4|MCM5|MCM6|MCM7|RFC2|RFC3|RFC4|RFC5|RPA1|CDC45|RECQL4|POLQ|RAD54B|GINS2|RTEL1|ERCC6L|CHTF18	-10.0022	0	4	0	0	-29.3388	39.9917
1	-11.5887	GO:0000724	M1	1	0	GO Biological Processes	19	double-strand break repair via homologous recombination	-11.5887	6.56581	10.3465	24155	134	604	22	3.64238	0.762285	672|2237|3014|4171|4172|4173|4174|4175|4176|5932|6117|8318|8438|8914|9401|10635|10721|25788|51659|51750|64710|79000	BRCA1|FEN1|H2AX|MCM2|MCM3|MCM4|MCM5|MCM6|MCM7|RBBP8|RPA1|CDC45|RAD54L|TIMELESS|RECQL4|RAD51AP1|POLQ|RAD54B|GINS2|RTEL1|NUCKS1|AUNIP	-9.2156	0	4	0	0	-29.3388	39.9917
1	-11.5215	GO:0000725	M1	1	0	GO Biological Processes	19	recombinational repair	-11.5215	6.51717	10.2945	24155	135	604	22	3.64238	0.762285	672|2237|3014|4171|4172|4173|4174|4175|4176|5932|6117|8318|8438|8914|9401|10635|10721|25788|51659|51750|64710|79000	BRCA1|FEN1|H2AX|MCM2|MCM3|MCM4|MCM5|MCM6|MCM7|RBBP8|RPA1|CDC45|RAD54L|TIMELESS|RECQL4|RAD51AP1|POLQ|RAD54B|GINS2|RTEL1|NUCKS1|AUNIP	-9.15338	0	4	0	0	-29.3388	39.9917
1	-10.6469	GO:0000727	M1	1	0	GO Biological Processes	19	double-strand break repair via break-induced replication	-10.6469	29.0849	14.9201	24155	11	604	8	1.3245	0.465171	4171|4172|4173|4174|4175|4176|8318|51659	MCM2|MCM3|MCM4|MCM5|MCM6|MCM7|CDC45|GINS2	-8.35053	0	4	0	0	-29.3388	39.9917
1	-10.4819	GO:0006302	M1	1	0	GO Biological Processes	19	double-strand break repair	-10.4819	4.51519	8.91089	24155	248	604	28	4.63576	0.855529	672|2237|2305|3014|4171|4172|4173|4174|4175|4176|5422|5932|6117|7468|8091|8318|8364|8438|8914|9319|9401|10635|10721|25788|51659|51750|64710|79000	BRCA1|FEN1|FOXM1|H2AX|MCM2|MCM3|MCM4|MCM5|MCM6|MCM7|POLA1|RBBP8|RPA1|NSD2|HMGA2|CDC45|H4C3|RAD54L|TIMELESS|TRIP13|RECQL4|RAD51AP1|POLQ|RAD54B|GINS2|RTEL1|NUCKS1|AUNIP	-8.19375	0	4	0	0	-29.3388	39.9917
1	-10.1794	R-HSA-176974	M1	1	0	Reactome Gene Sets	6	Unwinding of DNA	-10.1794	26.6611	14.239	24155	12	604	8	1.3245	0.465171	4171|4172|4173|4174|4175|4176|8318|51659	MCM2|MCM3|MCM4|MCM5|MCM6|MCM7|CDC45|GINS2	-7.90717	0	4	0	0	-29.3388	39.9917
1	-9.62237	CORUM:387	M1	1	0	CORUM	33	MCM complex	-9.62237	39.9917	15.297	24155	6	604	6	0.993377	0.403525	4171|4172|4173|4174|4175|4176	MCM2|MCM3|MCM4|MCM5|MCM6|MCM7	-7.40863	0	4	0	0	-29.3388	39.9917
1	-8.78659	GO:0006267	M1	1	0	GO Biological Processes	19	pre-replicative complex assembly involved in nuclear cell cycle DNA replication	-8.78659	34.2786	14.102	24155	7	604	6	0.993377	0.403525	4171|4172|4173|4174|4175|4176	MCM2|MCM3|MCM4|MCM5|MCM6|MCM7	-6.63718	0	4	0	0	-29.3388	39.9917
1	-8.78659	GO:0036388	M1	1	0	GO Biological Processes	19	pre-replicative complex assembly	-8.78659	34.2786	14.102	24155	7	604	6	0.993377	0.403525	4171|4172|4173|4174|4175|4176	MCM2|MCM3|MCM4|MCM5|MCM6|MCM7	-6.63718	0	4	0	0	-29.3388	39.9917
1	-8.78659	GO:1902299	M1	1	0	GO Biological Processes	19	pre-replicative complex assembly involved in cell cycle DNA replication	-8.78659	34.2786	14.102	24155	7	604	6	0.993377	0.403525	4171|4172|4173|4174|4175|4176	MCM2|MCM3|MCM4|MCM5|MCM6|MCM7	-6.63718	0	4	0	0	-29.3388	39.9917
1	-7.75944	GO:0006268	M1	1	0	GO Biological Processes	19	DNA unwinding involved in DNA replication	-7.75944	19.9959	11.3855	24155	14	604	7	1.15894	0.435493	3159|4171|4173|4175|4176|6117|9401	HMGA1|MCM2|MCM4|MCM6|MCM7|RPA1|RECQL4	-5.71374	0	4	0	0	-29.3388	39.9917
1	-7.49592	GO:1902969	M1	1	0	GO Biological Processes	19	mitotic DNA replication	-7.49592	18.6628	10.9583	24155	15	604	7	1.15894	0.435493	3978|4171|4172|4173|4175|5422|8318	LIG1|MCM2|MCM3|MCM4|MCM6|POLA1|CDC45	-5.47941	0	4	0	0	-29.3388	39.9917
1	-6.4121	CORUM:2792	M1	1	0	CORUM	33	MCM2-MCM4-MCM6-MCM7 complex	-6.4121	39.9917	12.4894	24155	4	604	4	0.662252	0.330028	4171|4173|4175|4176	MCM2|MCM4|MCM6|MCM7	-4.48725	0	4	0	0	-29.3388	39.9917
1	-6.4121	GO:1902292	M1	1	0	GO Biological Processes	19	cell cycle DNA replication initiation	-6.4121	39.9917	12.4894	24155	4	604	4	0.662252	0.330028	4171|4172|4173|5422	MCM2|MCM3|MCM4|POLA1	-4.48725	0	4	0	0	-29.3388	39.9917
1	-6.4121	GO:1902315	M1	1	0	GO Biological Processes	19	nuclear cell cycle DNA replication initiation	-6.4121	39.9917	12.4894	24155	4	604	4	0.662252	0.330028	4171|4172|4173|5422	MCM2|MCM3|MCM4|POLA1	-4.48725	0	4	0	0	-29.3388	39.9917
1	-6.4121	GO:1902975	M1	1	0	GO Biological Processes	19	mitotic DNA replication initiation	-6.4121	39.9917	12.4894	24155	4	604	4	0.662252	0.330028	4171|4172|4173|5422	MCM2|MCM3|MCM4|POLA1	-4.48725	0	4	0	0	-29.3388	39.9917
1	-6.03649	R-HSA-68867	M1	1	0	Reactome Gene Sets	6	Assembly of the pre-replicative complex	-6.03649	6.46925	7.23268	24155	68	604	11	1.82119	0.544087	4171|4172|4173|4174|4175|4176|5701|5708|5718|10197|23594	MCM2|MCM3|MCM4|MCM5|MCM6|MCM7|PSMC2|PSMD2|PSMD12|PSME3|ORC6	-4.14219	0	4	0	0	-29.3388	39.9917
1	-5.84314	R-HSA-68949	M1	1	0	Reactome Gene Sets	6	Orc1 removal from chromatin	-5.84314	6.1959	7.02157	24155	71	604	11	1.82119	0.544087	4171|4172|4173|4174|4175|4176|5701|5708|5718|10197|23594	MCM2|MCM3|MCM4|MCM5|MCM6|MCM7|PSMC2|PSMD2|PSMD12|PSME3|ORC6	-3.96335	0	4	0	0	-29.3388	39.9917
1	-4.81837	R-HSA-69052	M1	1	0	Reactome Gene Sets	6	Switching of origins to a post-replicative state	-4.81837	4.88788	5.91765	24155	90	604	11	1.82119	0.544087	4171|4172|4173|4174|4175|4176|5701|5708|5718|10197|23594	MCM2|MCM3|MCM4|MCM5|MCM6|MCM7|PSMC2|PSMD2|PSMD12|PSME3|ORC6	-3.05954	0	4	0	0	-29.3388	39.9917
1	-4.80802	CORUM:1452	M1	1	0	CORUM	33	MCM2-MCM6-MCM7 complex	-4.80802	39.9917	10.816	24155	3	604	3	0.496689	0.28605	4171|4175|4176	MCM2|MCM6|MCM7	-3.0575	0	4	0	0	-29.3388	39.9917
1	-4.80802	CORUM:2791	M1	1	0	CORUM	33	MCM4-MCM6-MCM7 complex	-4.80802	39.9917	10.816	24155	3	604	3	0.496689	0.28605	4173|4175|4176	MCM4|MCM6|MCM7	-3.0575	0	4	0	0	-29.3388	39.9917
1	-4.79686	CORUM:5611	M1	1	0	CORUM	33	Emerin complex 24	-4.79686	14.2828	7.96128	24155	14	604	5	0.827815	0.368674	4000|4171|4173|4175|79595	LMNA|MCM2|MCM4|MCM6|SAP130	-3.04986	0	4	0	0	-29.3388	39.9917
1	-18.7765	R-HSA-73886	M1	1	0	Reactome Gene Sets	6	Chromosome Maintenance	-18.7765	9.81615	14.8413	24155	110	604	27	4.4702	0.840842	2237|3014|3015|3978|5111|5422|5424|5426|5427|5557|5982|5983|5984|5985|6117|8364|10714|11339|23649|54069|55839|64105|64946|79019|79682|94239|387103	FEN1|H2AX|H2AZ1|LIG1|PCNA|POLA1|POLD1|POLE|POLE2|PRIM1|RFC2|RFC3|RFC4|RFC5|RPA1|H4C3|POLD3|OIP5|POLA2|MIS18A|CENPN|CENPK|CENPH|CENPM|CENPU|H2AZ2|CENPW	-15.9904	0	5	1	1	-18.7765	39.9917
1	-18.0778	R-HSA-174417	M1	1	0	Reactome Gene Sets	6	Telomere C-strand (Lagging Strand) Synthesis	-18.0778	24.9948	18.8341	24155	24	604	15	2.48344	0.63321	2237|3978|5111|5422|5424|5426|5427|5557|5982|5983|5984|5985|6117|10714|23649	FEN1|LIG1|PCNA|POLA1|POLD1|POLE|POLE2|PRIM1|RFC2|RFC3|RFC4|RFC5|RPA1|POLD3|POLA2	-15.3043	0	5	0	0	-18.7765	39.9917
1	-16.9842	GO:0032201	M1	1	0	GO Biological Processes	19	telomere maintenance via semi-conservative replication	-16.9842	22.2176	17.6655	24155	27	604	15	2.48344	0.63321	2237|5111|5422|5424|5426|5427|5557|5982|5983|5984|5985|6117|10714|23649|51750	FEN1|PCNA|POLA1|POLD1|POLE|POLE2|PRIM1|RFC2|RFC3|RFC4|RFC5|RPA1|POLD3|POLA2|RTEL1	-14.2687	0	5	0	0	-18.7765	39.9917
1	-16.0638	R-HSA-180786	M1	1	0	Reactome Gene Sets	6	Extension of Telomeres	-16.0638	19.9959	16.6723	24155	30	604	15	2.48344	0.63321	2237|3978|5111|5422|5424|5426|5427|5557|5982|5983|5984|5985|6117|10714|23649	FEN1|LIG1|PCNA|POLA1|POLD1|POLE|POLE2|PRIM1|RFC2|RFC3|RFC4|RFC5|RPA1|POLD3|POLA2	-13.4064	0	5	0	0	-18.7765	39.9917
1	-16.0612	R-HSA-69186	M1	1	0	Reactome Gene Sets	6	Lagging Strand Synthesis	-16.0612	25.9946	17.908	24155	20	604	13	2.15232	0.590487	2237|3978|5111|5422|5424|5557|5982|5983|5984|5985|6117|10714|23649	FEN1|LIG1|PCNA|POLA1|POLD1|PRIM1|RFC2|RFC3|RFC4|RFC5|RPA1|POLD3|POLA2	-13.4064	0	5	0	0	-18.7765	39.9917
1	-14.129	R-HSA-73894	M1	1	0	Reactome Gene Sets	6	DNA Repair	-14.129	4.54996	10.4622	24155	334	604	38	6.29139	0.987972	86|672|2177|2237|2956|3014|3015|3150|3978|5111|5424|5426|5427|5886|5932|5982|5983|5984|5985|6117|7468|8364|8533|8914|9156|9768|10635|10714|10721|29089|51514|51750|54962|55215|55247|94239|125476|252969	ACTL6A|BRCA1|FANCD2|FEN1|MSH6|H2AX|H2AZ1|HMGN1|LIG1|PCNA|POLD1|POLE|POLE2|RAD23A|RBBP8|RFC2|RFC3|RFC4|RFC5|RPA1|NSD2|H4C3|COPS3|TIMELESS|EXO1|PCLAF|RAD51AP1|POLD3|POLQ|UBE2T|DTL|RTEL1|TIPIN|FANCI|NEIL3|H2AZ2|INO80C|NEIL2	-11.6038	0	5	0	0	-18.7765	39.9917
1	-13.8914	R-HSA-5651801	M1	1	0	Reactome Gene Sets	6	PCNA-Dependent Long Patch Base Excision Repair	-13.8914	22.8524	16.0436	24155	21	604	12	1.98675	0.567801	2237|3978|5111|5424|5426|5427|5982|5983|5984|5985|6117|10714	FEN1|LIG1|PCNA|POLD1|POLE|POLE2|RFC2|RFC3|RFC4|RFC5|RPA1|POLD3	-11.3732	0	5	0	0	-18.7765	39.9917
1	-13.0903	R-HSA-174411	M1	1	0	Reactome Gene Sets	6	Polymerase switching on the C-strand of the telomere	-13.0903	28.5655	16.5219	24155	14	604	10	1.65563	0.519204	5111|5422|5424|5557|5982|5983|5984|5985|10714|23649	PCNA|POLA1|POLD1|PRIM1|RFC2|RFC3|RFC4|RFC5|POLD3|POLA2	-10.6301	0	5	0	0	-18.7765	39.9917
1	-13.0903	R-HSA-69091	M1	1	0	Reactome Gene Sets	6	Polymerase switching	-13.0903	28.5655	16.5219	24155	14	604	10	1.65563	0.519204	5111|5422|5424|5557|5982|5983|5984|5985|10714|23649	PCNA|POLA1|POLD1|PRIM1|RFC2|RFC3|RFC4|RFC5|POLD3|POLA2	-10.6301	0	5	0	0	-18.7765	39.9917
1	-13.0903	R-HSA-69109	M1	1	0	Reactome Gene Sets	6	Leading Strand Synthesis	-13.0903	28.5655	16.5219	24155	14	604	10	1.65563	0.519204	5111|5422|5424|5557|5982|5983|5984|5985|10714|23649	PCNA|POLA1|POLD1|PRIM1|RFC2|RFC3|RFC4|RFC5|POLD3|POLA2	-10.6301	0	5	0	0	-18.7765	39.9917
1	-12.9008	R-HSA-157579	M1	1	0	Reactome Gene Sets	6	Telomere Maintenance	-12.9008	9.26637	12.0078	24155	82	604	19	3.1457	0.710231	2237|3014|3015|3978|5111|5422|5424|5426|5427|5557|5982|5983|5984|5985|6117|8364|10714|23649|94239	FEN1|H2AX|H2AZ1|LIG1|PCNA|POLA1|POLD1|POLE|POLE2|PRIM1|RFC2|RFC3|RFC4|RFC5|RPA1|H4C3|POLD3|POLA2|H2AZ2	-10.4641	0	5	0	0	-18.7765	39.9917
1	-12.4244	R-HSA-110373	M1	1	0	Reactome Gene Sets	6	Resolution of AP sites via the multiple-nucleotide patch replacement pathway	-12.4244	18.4577	14.2631	24155	26	604	12	1.98675	0.567801	2237|3978|5111|5424|5426|5427|5982|5983|5984|5985|6117|10714	FEN1|LIG1|PCNA|POLD1|POLE|POLE2|RFC2|RFC3|RFC4|RFC5|RPA1|POLD3	-10.0045	0	5	0	0	-18.7765	39.9917
1	-11.6481	hsa03430	M1	1	0	KEGG Pathway	24	Mismatch repair	-11.6481	19.1265	13.928	24155	23	604	11	1.82119	0.544087	2956|3978|5111|5424|5982|5983|5984|5985|6117|9156|10714	MSH6|LIG1|PCNA|POLD1|RFC2|RFC3|RFC4|RFC5|RPA1|EXO1|POLD3	-9.26501	0	5	0	0	-18.7765	39.9917
1	-11.3238	R-HSA-5693538	M1	1	0	Reactome Gene Sets	6	Homology Directed Repair	-11.3238	6.37549	10.1416	24155	138	604	22	3.64238	0.762285	672|2237|3014|5111|5424|5426|5427|5932|5982|5983|5984|5985|6117|7468|8364|8914|9156|10635|10714|10721|51750|54962	BRCA1|FEN1|H2AX|PCNA|POLD1|POLE|POLE2|RBBP8|RFC2|RFC3|RFC4|RFC5|RPA1|NSD2|H4C3|TIMELESS|EXO1|RAD51AP1|POLD3|POLQ|RTEL1|TIPIN	-8.96532	0	5	0	0	-18.7765	39.9917
1	-11.2304	M46	M1	1	0	Canonical Pathways	11	PID ATR PATHWAY	-11.2304	13.3306	12.3416	24155	39	604	13	2.15232	0.590487	993|2177|4171|4176|5515|5982|5983|5984|5985|6117|7534|8914|54962	CDC25A|FANCD2|MCM2|MCM7|PPP2CA|RFC2|RFC3|RFC4|RFC5|RPA1|YWHAZ|TIMELESS|TIPIN	-8.88595	0	5	0	0	-18.7765	39.9917
1	-11.2304	R-HSA-73933	M1	1	0	Reactome Gene Sets	6	Resolution of Abasic Sites (AP sites)	-11.2304	13.3306	12.3416	24155	39	604	13	2.15232	0.590487	2237|3978|5111|5424|5426|5427|5982|5983|5984|5985|6117|10714|252969	FEN1|LIG1|PCNA|POLD1|POLE|POLE2|RFC2|RFC3|RFC4|RFC5|RPA1|POLD3|NEIL2	-8.88595	0	5	0	0	-18.7765	39.9917
1	-11.1497	R-HSA-5696397	M1	1	0	Reactome Gene Sets	6	Gap-filling DNA repair synthesis and ligation in GG-NER	-11.1497	17.5964	13.2957	24155	25	604	11	1.82119	0.544087	3978|5111|5424|5426|5427|5982|5983|5984|5985|6117|10714	LIG1|PCNA|POLD1|POLE|POLE2|RFC2|RFC3|RFC4|RFC5|RPA1|POLD3	-8.81445	0	5	0	0	-18.7765	39.9917
1	-10.9219	R-HSA-73884	M1	1	0	Reactome Gene Sets	6	Base Excision Repair	-10.9219	7.82447	10.5026	24155	92	604	18	2.98013	0.691878	2237|3014|3015|3978|5111|5424|5426|5427|5982|5983|5984|5985|6117|8364|10714|55247|94239|252969	FEN1|H2AX|H2AZ1|LIG1|PCNA|POLD1|POLE|POLE2|RFC2|RFC3|RFC4|RFC5|RPA1|H4C3|POLD3|NEIL3|H2AZ2|NEIL2	-8.60869	0	5	0	0	-18.7765	39.9917
1	-10.7393	GO:0000723	M1	1	0	GO Biological Processes	19	telomere maintenance	-10.7393	5.67784	9.56684	24155	162	604	23	3.80795	0.778747	2237|3178|3181|3184|3320|5111|5422|5424|5426|5427|5557|5982|5983|5984|5985|6117|8364|9156|9401|10714|23649|51750|140609	FEN1|HNRNPA1|HNRNPA2B1|HNRNPD|HSP90AA1|PCNA|POLA1|POLD1|POLE|POLE2|PRIM1|RFC2|RFC3|RFC4|RFC5|RPA1|H4C3|EXO1|RECQL4|POLD3|POLA2|RTEL1|NEK7	-8.43879	0	5	0	0	-18.7765	39.9917
1	-10.1107	R-HSA-110314	M1	1	0	Reactome Gene Sets	6	Recognition of DNA damage by PCNA-containing replication complex	-10.1107	14.6636	11.9923	24155	30	604	11	1.82119	0.544087	5111|5424|5426|5427|5982|5983|5984|5985|6117|10714|51514	PCNA|POLD1|POLE|POLE2|RFC2|RFC3|RFC4|RFC5|RPA1|POLD3|DTL	-7.85389	0	5	0	0	-18.7765	39.9917
1	-10.0868	R-HSA-5685942	M1	1	0	Reactome Gene Sets	6	HDR through Homologous Recombination (HRR)	-10.0868	8.95337	10.4399	24155	67	604	15	2.48344	0.63321	672|5111|5424|5426|5427|5932|5982|5983|5984|5985|6117|9156|10635|10714|51750	BRCA1|PCNA|POLD1|POLE|POLE2|RBBP8|RFC2|RFC3|RFC4|RFC5|RPA1|EXO1|RAD51AP1|POLD3|RTEL1	-7.8337	0	5	0	0	-18.7765	39.9917
1	-10.0445	GO:0032200	M1	1	0	GO Biological Processes	19	telomere organization	-10.0445	5.25605	9.0492	24155	175	604	23	3.80795	0.778747	2237|3178|3181|3184|3320|5111|5422|5424|5426|5427|5557|5982|5983|5984|5985|6117|8364|9156|9401|10714|23649|51750|140609	FEN1|HNRNPA1|HNRNPA2B1|HNRNPD|HSP90AA1|PCNA|POLA1|POLD1|POLE|POLE2|PRIM1|RFC2|RFC3|RFC4|RFC5|RPA1|H4C3|EXO1|RECQL4|POLD3|POLA2|RTEL1|NEK7	-7.79517	0	5	0	0	-18.7765	39.9917
1	-9.94	R-HSA-5693567	M1	1	0	Reactome Gene Sets	6	HDR through Homologous Recombination (HRR) or Single Strand Annealing (SSA)	-9.94	6.05935	9.33419	24155	132	604	20	3.31126	0.728058	672|3014|5111|5424|5426|5427|5932|5982|5983|5984|5985|6117|7468|8364|8914|9156|10635|10714|51750|54962	BRCA1|H2AX|PCNA|POLD1|POLE|POLE2|RBBP8|RFC2|RFC3|RFC4|RFC5|RPA1|NSD2|H4C3|TIMELESS|EXO1|RAD51AP1|POLD3|RTEL1|TIPIN	-7.69801	0	5	0	0	-18.7765	39.9917
1	-9.89627	GO:0006297	M1	1	0	GO Biological Processes	19	nucleotide-excision repair, DNA gap filling	-9.89627	16.6632	12.2944	24155	24	604	10	1.65563	0.519204	3978|5111|5424|5426|5982|5983|5984|5985|6117|10714	LIG1|PCNA|POLD1|POLE|RFC2|RFC3|RFC4|RFC5|RPA1|POLD3	-7.65791	0	5	0	0	-18.7765	39.9917
1	-9.7572	R-HSA-5656169	M1	1	0	Reactome Gene Sets	6	Termination of translesion DNA synthesis	-9.7572	13.7472	11.5553	24155	32	604	11	1.82119	0.544087	5111|5424|5426|5427|5982|5983|5984|5985|6117|9768|10714	PCNA|POLD1|POLE|POLE2|RFC2|RFC3|RFC4|RFC5|RPA1|PCLAF|POLD3	-7.53308	0	5	0	0	-18.7765	39.9917
1	-9.70646	R-HSA-5693532	M1	1	0	Reactome Gene Sets	6	DNA Double-Strand Break Repair	-9.70646	5.30011	8.90298	24155	166	604	22	3.64238	0.762285	672|2237|3014|5111|5424|5426|5427|5932|5982|5983|5984|5985|6117|7468|8364|8914|9156|10635|10714|10721|51750|54962	BRCA1|FEN1|H2AX|PCNA|POLD1|POLE|POLE2|RBBP8|RFC2|RFC3|RFC4|RFC5|RPA1|NSD2|H4C3|TIMELESS|EXO1|RAD51AP1|POLD3|POLQ|RTEL1|TIPIN	-7.48583	0	5	0	0	-18.7765	39.9917
1	-9.62237	CORUM:2797	M1	1	0	CORUM	33	PCNA-CHL12-RFC2-5 complex	-9.62237	39.9917	15.297	24155	6	604	6	0.993377	0.403525	5111|5982|5983|5984|5985|63922	PCNA|RFC2|RFC3|RFC4|RFC5|CHTF18	-7.40863	0	5	0	0	-18.7765	39.9917
1	-9.58171	GO:0000731	M1	1	0	GO Biological Processes	19	DNA synthesis involved in DNA repair	-9.58171	10.194	10.5257	24155	51	604	13	2.15232	0.590487	5111|5422|5424|5426|5427|5982|5983|5984|5985|6117|9768|10714|51514	PCNA|POLA1|POLD1|POLE|POLE2|RFC2|RFC3|RFC4|RFC5|RPA1|PCLAF|POLD3|DTL	-7.37138	0	5	0	0	-18.7765	39.9917
1	-9.46672	GO:0006301	M1	1	0	GO Biological Processes	19	postreplication repair	-9.46672	9.99793	10.402	24155	52	604	13	2.15232	0.590487	672|5111|5424|5427|5982|5983|5984|5985|6117|9768|10714|51514|55339	BRCA1|PCNA|POLD1|POLE2|RFC2|RFC3|RFC4|RFC5|RPA1|PCLAF|POLD3|DTL|WDR33	-7.26645	0	5	0	0	-18.7765	39.9917
1	-8.8995	hsa03420	M1	1	0	KEGG Pathway	24	Nucleotide excision repair	-8.8995	10.2107	10.122	24155	47	604	12	1.98675	0.567801	3978|5111|5424|5426|5427|5886|5982|5983|5984|5985|6117|10714	LIG1|PCNA|POLD1|POLE|POLE2|RAD23A|RFC2|RFC3|RFC4|RFC5|RPA1|POLD3	-6.74032	0	5	0	0	-18.7765	39.9917
1	-8.78446	R-HSA-73893	M1	1	0	Reactome Gene Sets	6	DNA Damage Bypass	-8.78446	9.99793	9.99309	24155	48	604	12	1.98675	0.567801	5111|5424|5426|5427|5982|5983|5984|5985|6117|9768|10714|51514	PCNA|POLD1|POLE|POLE2|RFC2|RFC3|RFC4|RFC5|RPA1|PCLAF|POLD3|DTL	-6.63718	0	5	0	0	-18.7765	39.9917
1	-8.7126	R-HSA-110313	M1	1	0	Reactome Gene Sets	6	Translesion synthesis by Y family DNA polymerases bypasses lesions on DNA template	-8.7126	11.2797	10.2889	24155	39	604	11	1.82119	0.544087	5111|5424|5426|5427|5982|5983|5984|5985|6117|9768|10714	PCNA|POLD1|POLE|POLE2|RFC2|RFC3|RFC4|RFC5|RPA1|PCLAF|POLD3	-6.57115	0	5	0	0	-18.7765	39.9917
1	-8.62522	R-HSA-5696399	M1	1	0	Reactome Gene Sets	6	Global Genome Nucleotide Excision Repair (GG-NER)	-8.62522	7.14138	9.02956	24155	84	604	15	2.48344	0.63321	86|3978|5111|5424|5426|5427|5886|5982|5983|5984|5985|6117|8533|10714|125476	ACTL6A|LIG1|PCNA|POLD1|POLE|POLE2|RAD23A|RFC2|RFC3|RFC4|RFC5|RPA1|COPS3|POLD3|INO80C	-6.49237	0	5	0	0	-18.7765	39.9917
1	-8.61774	GO:0006289	M1	1	0	GO Biological Processes	19	nucleotide-excision repair	-8.61774	6.12486	8.66659	24155	111	604	17	2.81457	0.672958	3150|3978|5111|5422|5424|5426|5886|5932|5982|5983|5984|5985|6117|8533|10714|55247|252969	HMGN1|LIG1|PCNA|POLA1|POLD1|POLE|RAD23A|RBBP8|RFC2|RFC3|RFC4|RFC5|RPA1|COPS3|POLD3|NEIL3|NEIL2	-6.48772	0	5	0	0	-18.7765	39.9917
1	-8.45698	GO:0019985	M1	1	0	GO Biological Processes	19	translesion synthesis	-8.45698	10.7295	9.98517	24155	41	604	11	1.82119	0.544087	5111|5424|5427|5982|5983|5984|5985|6117|9768|10714|51514	PCNA|POLD1|POLE2|RFC2|RFC3|RFC4|RFC5|RPA1|PCLAF|POLD3|DTL	-6.33207	0	5	0	0	-18.7765	39.9917
1	-8.21258	GO:0060249	M1	1	0	GO Biological Processes	19	anatomical structure homeostasis	-8.21258	3.11148	7.13342	24155	437	604	34	5.62914	0.937824	231|794|1436|1956|2237|3178|3181|3184|3320|3569|4015|5111|5422|5424|5426|5427|5557|5578|5880|5982|5983|5984|5985|6117|8364|9156|9401|10714|23649|25937|51750|140609|158046|284266	AKR1B1|CALB2|CSF1R|EGFR|FEN1|HNRNPA1|HNRNPA2B1|HNRNPD|HSP90AA1|IL6|LOX|PCNA|POLA1|POLD1|POLE|POLE2|PRIM1|PRKCA|RAC2|RFC2|RFC3|RFC4|RFC5|RPA1|H4C3|EXO1|RECQL4|POLD3|POLA2|WWTR1|RTEL1|NEK7|NXNL2|SIGLEC15	-6.12035	0	5	0	0	-18.7765	39.9917
1	-8.01688	CORUM:2199	M1	1	0	CORUM	33	CHTF18-RFC2-5 complex	-8.01688	39.9917	13.9639	24155	5	604	5	0.827815	0.368674	5982|5983|5984|5985|63922	RFC2|RFC3|RFC4|RFC5|CHTF18	-5.94485	0	5	0	0	-18.7765	39.9917
1	-8.01688	CORUM:2201	M1	1	0	CORUM	33	PCNA-RFC2-5 complex	-8.01688	39.9917	13.9639	24155	5	604	5	0.827815	0.368674	5111|5982|5983|5984|5985	PCNA|RFC2|RFC3|RFC4|RFC5	-5.94485	0	5	0	0	-18.7765	39.9917
1	-8.01688	CORUM:2202	M1	1	0	CORUM	33	CHTF18-RFC2-5 complex	-8.01688	39.9917	13.9639	24155	5	604	5	0.827815	0.368674	5982|5983|5984|5985|63922	RFC2|RFC3|RFC4|RFC5|CHTF18	-5.94485	0	5	0	0	-18.7765	39.9917
1	-7.75953	R-HSA-5696398	M1	1	0	Reactome Gene Sets	6	Nucleotide Excision Repair	-7.75953	5.76457	8.05732	24155	111	604	16	2.64901	0.653421	86|3150|3978|5111|5424|5426|5427|5886|5982|5983|5984|5985|6117|8533|10714|125476	ACTL6A|HMGN1|LIG1|PCNA|POLD1|POLE|POLE2|RAD23A|RFC2|RFC3|RFC4|RFC5|RPA1|COPS3|POLD3|INO80C	-5.71374	0	5	0	0	-18.7765	39.9917
1	-7.72603	CORUM:1003	M1	1	0	CORUM	33	RC complex (Replication competent complex)	-7.72603	26.6611	12.3306	24155	9	604	6	0.993377	0.403525	5422|5982|5983|5984|5985|23649	POLA1|RFC2|RFC3|RFC4|RFC5|POLA2	-5.68952	0	5	0	0	-18.7765	39.9917
1	-7.53237	GO:0042769	M1	1	0	GO Biological Processes	19	DNA damage response, detection of DNA damage	-7.53237	10.2543	9.26256	24155	39	604	10	1.65563	0.519204	5111|5424|5982|5983|5984|5985|6117|8091|10714|51514	PCNA|POLD1|RFC2|RFC3|RFC4|RFC5|RPA1|HMGA2|POLD3|DTL	-5.51149	0	5	0	0	-18.7765	39.9917
1	-7.30556	R-HSA-5696400	M1	1	0	Reactome Gene Sets	6	Dual Incision in GG-NER	-7.30556	9.75408	8.98413	24155	41	604	10	1.65563	0.519204	5111|5424|5426|5427|5982|5983|5984|5985|6117|10714	PCNA|POLD1|POLE|POLE2|RFC2|RFC3|RFC4|RFC5|RPA1|POLD3	-5.29977	0	5	0	0	-18.7765	39.9917
1	-7.19064	R-HSA-6782210	M1	1	0	Reactome Gene Sets	6	Gap-filling DNA repair synthesis and ligation in TC-NER	-7.19064	7.38309	8.25234	24155	65	604	12	1.98675	0.567801	3150|3978|5111|5424|5426|5427|5982|5983|5984|5985|6117|10714	HMGN1|LIG1|PCNA|POLD1|POLE|POLE2|RFC2|RFC3|RFC4|RFC5|RPA1|POLD3	-5.19116	0	5	0	0	-18.7765	39.9917
1	-7.11637	R-HSA-6781827	M1	1	0	Reactome Gene Sets	6	Transcription-Coupled Nucleotide Excision Repair (TC-NER)	-7.11637	6.58092	7.95674	24155	79	604	13	2.15232	0.590487	3150|3978|5111|5424|5426|5427|5982|5983|5984|5985|6117|8533|10714	HMGN1|LIG1|PCNA|POLD1|POLE|POLE2|RFC2|RFC3|RFC4|RFC5|RPA1|COPS3|POLD3	-5.11897	0	5	0	0	-18.7765	39.9917
1	-7.10352	GO:0090329	M1	1	0	GO Biological Processes	19	regulation of DNA-dependent DNA replication	-7.10352	8.14646	8.41935	24155	54	604	11	1.82119	0.544087	2956|5982|5983|5984|5985|8914|9126|29980|54962|63922|144455	MSH6|RFC2|RFC3|RFC4|RFC5|TIMELESS|SMC3|DONSON|TIPIN|CHTF18|E2F7	-5.11026	0	5	0	0	-18.7765	39.9917
1	-7.09339	GO:0006275	M1	1	0	GO Biological Processes	19	regulation of DNA replication	-7.09339	5.55441	7.59664	24155	108	604	15	2.48344	0.63321	1956|2956|5111|5515|5982|5983|5984|5985|8914|9126|29980|54962|63922|64710|144455	EGFR|MSH6|PCNA|PPP2CA|RFC2|RFC3|RFC4|RFC5|TIMELESS|SMC3|DONSON|TIPIN|CHTF18|NUCKS1|E2F7	-5.10219	0	5	0	0	-18.7765	39.9917
1	-6.99069	R-HSA-69473	M1	1	0	Reactome Gene Sets	6	G2/M DNA damage checkpoint	-6.99069	5.89352	7.65321	24155	95	604	14	2.31788	0.612258	672|891|3014|5932|5982|5983|5984|5985|6117|7468|7534|8364|9156|10971	BRCA1|CCNB1|H2AX|RBBP8|RFC2|RFC3|RFC4|RFC5|RPA1|NSD2|YWHAZ|H4C3|EXO1|YWHAQ	-5.01473	0	5	0	0	-18.7765	39.9917
1	-6.7128	CORUM:2804	M1	1	0	CORUM	33	CTF18-cohesion-RFC complex	-6.7128	28.5655	11.6811	24155	7	604	5	0.827815	0.368674	5982|5983|5984|5985|63922	RFC2|RFC3|RFC4|RFC5|CHTF18	-4.75319	0	5	0	0	-18.7765	39.9917
1	-6.7128	GO:1900262	M1	1	0	GO Biological Processes	19	regulation of DNA-directed DNA polymerase activity	-6.7128	28.5655	11.6811	24155	7	604	5	0.827815	0.368674	5982|5983|5984|5985|63922	RFC2|RFC3|RFC4|RFC5|CHTF18	-4.75319	0	5	0	0	-18.7765	39.9917
1	-6.7128	GO:1900264	M1	1	0	GO Biological Processes	19	positive regulation of DNA-directed DNA polymerase activity	-6.7128	28.5655	11.6811	24155	7	604	5	0.827815	0.368674	5982|5983|5984|5985|63922	RFC2|RFC3|RFC4|RFC5|CHTF18	-4.75319	0	5	0	0	-18.7765	39.9917
1	-6.69965	M1	M1	1	0	Canonical Pathways	11	PID FANCONI PATHWAY	-6.69965	8.50888	8.25186	24155	47	604	10	1.65563	0.519204	672|2177|3014|5982|5983|5984|5985|6117|29089|55215	BRCA1|FANCD2|H2AX|RFC2|RFC3|RFC4|RFC5|RPA1|UBE2T|FANCI	-4.74563	0	5	0	0	-18.7765	39.9917
1	-6.46239	GO:0042276	M1	1	0	GO Biological Processes	19	error-prone translesion synthesis	-6.46239	13.9971	9.31207	24155	20	604	7	1.15894	0.435493	5111|5427|5982|5983|5984|5985|6117	PCNA|POLE2|RFC2|RFC3|RFC4|RFC5|RPA1	-4.52142	0	5	0	0	-18.7765	39.9917
1	-6.4121	CORUM:2200	M1	1	0	CORUM	33	RFC2-5 subcomplex	-6.4121	39.9917	12.4894	24155	4	604	4	0.662252	0.330028	5982|5983|5984|5985	RFC2|RFC3|RFC4|RFC5	-4.48725	0	5	0	0	-18.7765	39.9917
1	-6.29589	CORUM:3070	M1	1	0	CORUM	33	CTF18-cohesion-RFC-POLH complex	-6.29589	24.9948	10.8702	24155	8	604	5	0.827815	0.368674	5982|5983|5984|5985|63922	RFC2|RFC3|RFC4|RFC5|CHTF18	-4.38305	0	5	0	0	-18.7765	39.9917
1	-6.17138	R-HSA-6782135	M1	1	0	Reactome Gene Sets	6	Dual incision in TC-NER	-6.17138	6.66529	7.38062	24155	66	604	11	1.82119	0.544087	3150|5111|5424|5426|5427|5982|5983|5984|5985|6117|10714	HMGN1|PCNA|POLD1|POLE|POLE2|RFC2|RFC3|RFC4|RFC5|RPA1|POLD3	-4.26208	0	5	0	0	-18.7765	39.9917
1	-6.11424	R-HSA-5693579	M1	1	0	Reactome Gene Sets	6	Homologous DNA Pairing and Strand Exchange	-6.11424	8.56965	7.86291	24155	42	604	9	1.49007	0.492974	672|5932|5982|5983|5984|5985|6117|9156|10635	BRCA1|RBBP8|RFC2|RFC3|RFC4|RFC5|RPA1|EXO1|RAD51AP1	-4.215	0	5	0	0	-18.7765	39.9917
1	-5.99594	R-HSA-5693607	M1	1	0	Reactome Gene Sets	6	Processing of DNA double-strand break ends	-5.99594	5.30502	6.83874	24155	98	604	13	2.15232	0.590487	672|3014|5932|5982|5983|5984|5985|6117|7468|8364|8914|9156|54962	BRCA1|H2AX|RBBP8|RFC2|RFC3|RFC4|RFC5|RPA1|NSD2|H4C3|TIMELESS|EXO1|TIPIN	-4.10654	0	5	0	0	-18.7765	39.9917
1	-5.81184	R-HSA-110312	M1	1	0	Reactome Gene Sets	6	Translesion synthesis by REV1	-5.81184	14.9969	8.96893	24155	16	604	6	0.993377	0.403525	5111|5982|5983|5984|5985|6117	PCNA|RFC2|RFC3|RFC4|RFC5|RPA1	-3.93521	0	5	0	0	-18.7765	39.9917
1	-5.72184	CORUM:266	M1	1	0	CORUM	33	RAD17-RFC complex	-5.72184	31.9934	11.0995	24155	5	604	4	0.662252	0.330028	5982|5983|5984|5985	RFC2|RFC3|RFC4|RFC5	-3.86218	0	5	0	0	-18.7765	39.9917
1	-5.72184	CORUM:270	M1	1	0	CORUM	33	RAD17-RFC complex	-5.72184	31.9934	11.0995	24155	5	604	4	0.662252	0.330028	5982|5983|5984|5985	RFC2|RFC3|RFC4|RFC5	-3.86218	0	5	0	0	-18.7765	39.9917
1	-5.72184	CORUM:277	M1	1	0	CORUM	33	RFC complex	-5.72184	31.9934	11.0995	24155	5	604	4	0.662252	0.330028	5982|5983|5984|5985	RFC2|RFC3|RFC4|RFC5	-3.86218	0	5	0	0	-18.7765	39.9917
1	-5.72184	CORUM:279	M1	1	0	CORUM	33	RFC complex	-5.72184	31.9934	11.0995	24155	5	604	4	0.662252	0.330028	5982|5983|5984|5985	RFC2|RFC3|RFC4|RFC5	-3.86218	0	5	0	0	-18.7765	39.9917
1	-5.72184	CORUM:2799	M1	1	0	CORUM	33	RFC complex	-5.72184	31.9934	11.0995	24155	5	604	4	0.662252	0.330028	5982|5983|5984|5985	RFC2|RFC3|RFC4|RFC5	-3.86218	0	5	0	0	-18.7765	39.9917
1	-5.72184	CORUM:2810	M1	1	0	CORUM	33	RAD17-RFC complex	-5.72184	31.9934	11.0995	24155	5	604	4	0.662252	0.330028	5982|5983|5984|5985	RFC2|RFC3|RFC4|RFC5	-3.86218	0	5	0	0	-18.7765	39.9917
1	-5.71982	GO:0006283	M1	1	0	GO Biological Processes	19	transcription-coupled nucleotide-excision repair	-5.71982	6.02615	6.88746	24155	73	604	11	1.82119	0.544087	3150|3978|5111|5424|5982|5983|5984|5985|6117|8533|10714	HMGN1|LIG1|PCNA|POLD1|RFC2|RFC3|RFC4|RFC5|RPA1|COPS3|POLD3	-3.86167	0	5	0	0	-18.7765	39.9917
1	-5.63206	R-HSA-5655862	M1	1	0	Reactome Gene Sets	6	Translesion synthesis by POLK	-5.63206	14.1147	8.66246	24155	17	604	6	0.993377	0.403525	5111|5982|5983|5984|5985|6117	PCNA|RFC2|RFC3|RFC4|RFC5|RPA1	-3.78434	0	5	0	0	-18.7765	39.9917
1	-5.63206	R-HSA-5656121	M1	1	0	Reactome Gene Sets	6	Translesion synthesis by POLI	-5.63206	14.1147	8.66246	24155	17	604	6	0.993377	0.403525	5111|5982|5983|5984|5985|6117	PCNA|RFC2|RFC3|RFC4|RFC5|RPA1	-3.78434	0	5	0	0	-18.7765	39.9917
1	-5.52719	GO:0006296	M1	1	0	GO Biological Processes	19	nucleotide-excision repair, DNA incision, 5'-to lesion	-5.52719	8.64686	7.45455	24155	37	604	8	1.3245	0.465171	5111|5424|5982|5983|5984|5985|6117|10714	PCNA|POLD1|RFC2|RFC3|RFC4|RFC5|RPA1|POLD3	-3.68387	0	5	0	0	-18.7765	39.9917
1	-5.52719	R-HSA-5685938	M1	1	0	Reactome Gene Sets	6	HDR through Single Strand Annealing (SSA)	-5.52719	8.64686	7.45455	24155	37	604	8	1.3245	0.465171	672|5932|5982|5983|5984|5985|6117|9156	BRCA1|RBBP8|RFC2|RFC3|RFC4|RFC5|RPA1|EXO1	-3.68387	0	5	0	0	-18.7765	39.9917
1	-5.34395	GO:0033683	M1	1	0	GO Biological Processes	19	nucleotide-excision repair, DNA incision	-5.34395	8.20343	7.20987	24155	39	604	8	1.3245	0.465171	5111|5424|5982|5983|5984|5985|6117|10714	PCNA|POLD1|RFC2|RFC3|RFC4|RFC5|RPA1|POLD3	-3.52195	0	5	0	0	-18.7765	39.9917
1	-5.34395	R-HSA-5693616	M1	1	0	Reactome Gene Sets	6	Presynaptic phase of homologous DNA pairing and strand exchange	-5.34395	8.20343	7.20987	24155	39	604	8	1.3245	0.465171	672|5932|5982|5983|5984|5985|6117|9156	BRCA1|RBBP8|RFC2|RFC3|RFC4|RFC5|RPA1|EXO1	-3.52195	0	5	0	0	-18.7765	39.9917
1	-5.3097	R-HSA-110320	M1	1	0	Reactome Gene Sets	6	Translesion Synthesis by POLH	-5.3097	12.629	8.1207	24155	19	604	6	0.993377	0.403525	5111|5982|5983|5984|5985|6117	PCNA|RFC2|RFC3|RFC4|RFC5|RPA1	-3.49047	0	5	0	0	-18.7765	39.9917
1	-5.25343	CORUM:2203	M1	1	0	CORUM	33	BRD4-RFC complex	-5.25343	26.6611	10.0672	24155	6	604	4	0.662252	0.330028	5982|5983|5984|5985	RFC2|RFC3|RFC4|RFC5	-3.44104	0	5	0	0	-18.7765	39.9917
1	-5.16406	GO:0070987	M1	1	0	GO Biological Processes	19	error-free translesion synthesis	-5.16406	11.9975	7.87942	24155	20	604	6	0.993377	0.403525	5111|5982|5983|5984|5985|6117	PCNA|RFC2|RFC3|RFC4|RFC5|RPA1	-3.36107	0	5	0	0	-18.7765	39.9917
1	-4.80802	CORUM:278	M1	1	0	CORUM	33	RFC core complex	-4.80802	39.9917	10.816	24155	3	604	3	0.496689	0.28605	5982|5984|5985	RFC2|RFC4|RFC5	-3.0575	0	5	0	0	-18.7765	39.9917
1	-4.60183	CORUM:268	M1	1	0	CORUM	33	9-1-1-RAD17-RFC complex	-4.60183	19.9959	8.60559	24155	8	604	4	0.662252	0.330028	5982|5983|5984|5985	RFC2|RFC3|RFC4|RFC5	-2.87087	0	5	0	0	-18.7765	39.9917
1	-4.60183	CORUM:274	M1	1	0	CORUM	33	9-1-1-RAD17-RFC complex	-4.60183	19.9959	8.60559	24155	8	604	4	0.662252	0.330028	5982|5983|5984|5985	RFC2|RFC3|RFC4|RFC5	-2.87087	0	5	0	0	-18.7765	39.9917
1	-4.60183	CORUM:434	M1	1	0	CORUM	33	BASC (Ab 80) complex (BRCA1-associated genome surveillance complex)	-4.60183	19.9959	8.60559	24155	8	604	4	0.662252	0.330028	672|2956|5982|5984	BRCA1|MSH6|RFC2|RFC4	-2.87087	0	5	0	0	-18.7765	39.9917
1	-3.78704	CORUM:433	M1	1	0	CORUM	33	BASC complex (BRCA1-associated genome surveillance complex)	-3.78704	13.3306	6.84206	24155	12	604	4	0.662252	0.330028	672|2956|5982|5984	BRCA1|MSH6|RFC2|RFC4	-2.15613	0	5	0	0	-18.7765	39.9917
1	-3.5315	CORUM:435	M1	1	0	CORUM	33	BASC (Ab 81) complex (BRCA1-associated genome surveillance complex)	-3.5315	19.9959	7.45235	24155	6	604	3	0.496689	0.28605	672|5982|5984	BRCA1|RFC2|RFC4	-1.94555	0	5	0	0	-18.7765	39.9917
1	-3.3054	R-HSA-6804756	M1	1	0	Reactome Gene Sets	6	Regulation of TP53 Activity through Phosphorylation	-3.3054	3.91223	4.48181	24155	92	604	9	1.49007	0.492974	672|5932|5982|5983|5984|5985|6117|9156|22974	BRCA1|RBBP8|RFC2|RFC3|RFC4|RFC5|RPA1|EXO1|TPX2	-1.74828	0	5	0	0	-18.7765	39.9917
1	-3.16972	GO:0090305	M1	1	0	GO Biological Processes	19	nucleic acid phosphodiester bond hydrolysis	-3.16972	2.37575	3.85927	24155	303	604	18	2.98013	0.691878	1479|2237|3569|5111|5393|5424|5426|5932|5982|5983|5984|5985|6117|9156|10535|10714|11340|118460	CSTF3|FEN1|IL6|PCNA|EXOSC9|POLD1|POLE|RBBP8|RFC2|RFC3|RFC4|RFC5|RPA1|EXO1|RNASEH2A|POLD3|EXOSC8|EXOSC6	-1.64033	0	5	0	0	-18.7765	39.9917
1	-2.70259	GO:1901796	M1	1	0	GO Biological Processes	19	regulation of signal transduction by p53 class mediator	-2.70259	2.66611	3.59311	24155	180	604	12	1.98675	0.567801	672|960|5932|5982|5983|5984|5985|6117|8444|9156|22974|83596	BRCA1|CD44|RBBP8|RFC2|RFC3|RFC4|RFC5|RPA1|DYRK3|EXO1|TPX2|BCL2L12	-1.26415	0	5	0	0	-18.7765	39.9917
1	-2.62575	R-HSA-5633007	M1	1	0	Reactome Gene Sets	6	Regulation of TP53 Activity	-2.62575	2.74943	3.55553	24155	160	604	11	1.82119	0.544087	672|5515|5932|5982|5983|5984|5985|6117|6446|9156|22974	BRCA1|PPP2CA|RBBP8|RFC2|RFC3|RFC4|RFC5|RPA1|SGK1|EXO1|TPX2	-1.21184	0	5	0	0	-18.7765	39.9917
1	-15.8867	GO:0000226	M1	1	0	GO Biological Processes	19	microtubule cytoskeleton organization	-15.8867	3.75809	10.6141	24155	564	604	53	8.77483	1.15122	332|636|672|891|3832|3925|4000|4085|5902|7283|7756|7846|9055|9126|9493|9738|9768|9793|9928|10112|10253|10376|10381|10383|10460|10615|10733|10982|11116|22974|22995|23636|24137|25914|26586|29127|51203|54908|57405|79000|84790|89958|93323|117178|140609|151648|220134|221150|284403|344148|347240|387103|440145	BIRC5|BICD1|BRCA1|CCNB1|KIF11|STMN1|LMNA|MAD2L1|RANBP1|TUBG1|ZNF207|TUBA1A|PRC1|SMC3|KIF23|CCP110|PCLAF|CKAP5|KIF14|KIF20A|SPRY2|TUBA1B|TUBB3|TUBB4B|TACC3|SPAG5|PLK4|MAPRE2|FGFR1OP|TPX2|CEP152|NUP62|KIF4A|RTTN|CKAP2|RACGAP1|NUSAP1|SPDL1|SPC25|AUNIP|TUBA1C|SAPCD2|HAUS8|SSX2IP|NEK7|SGO1|SKA1|SKA3|WDR62|NCKAP5|KIF24|CENPW|MZT1	-13.2412	0	6	1	1	-15.8867	6.56581
1	-13.217	GO:0007017	M1	1	0	GO Biological Processes	19	microtubule-based process	-13.217	3.03602	9.15826	24155	764	604	58	9.60265	1.19882	332|636|672|891|3832|3925|4000|4085|5902|7283|7756|7846|9055|9126|9493|9738|9768|9787|9793|9928|10112|10253|10376|10381|10383|10460|10615|10733|10982|11116|22974|22995|23636|24137|25914|26586|29127|51203|51512|54908|56683|56992|57405|79000|84790|89891|89958|93323|117178|140609|151648|220134|221150|284403|344148|347240|387103|440145	BIRC5|BICD1|BRCA1|CCNB1|KIF11|STMN1|LMNA|MAD2L1|RANBP1|TUBG1|ZNF207|TUBA1A|PRC1|SMC3|KIF23|CCP110|PCLAF|DLGAP5|CKAP5|KIF14|KIF20A|SPRY2|TUBA1B|TUBB3|TUBB4B|TACC3|SPAG5|PLK4|MAPRE2|FGFR1OP|TPX2|CEP152|NUP62|KIF4A|RTTN|CKAP2|RACGAP1|NUSAP1|GTSE1|SPDL1|CFAP298|KIF15|SPC25|AUNIP|TUBA1C|WDR34|SAPCD2|HAUS8|SSX2IP|NEK7|SGO1|SKA1|SKA3|WDR62|NCKAP5|KIF24|CENPW|MZT1	-10.7383	0	6	0	0	-15.8867	6.56581
1	-11.5887	GO:1902850	M1	1	0	GO Biological Processes	19	microtubule cytoskeleton organization involved in mitosis	-11.5887	6.56581	10.3465	24155	134	604	22	3.64238	0.762285	332|891|3832|3925|4085|7283|7756|9055|9126|9493|10253|10460|22974|23636|24137|29127|51203|54908|57405|89958|284403|440145	BIRC5|CCNB1|KIF11|STMN1|MAD2L1|TUBG1|ZNF207|PRC1|SMC3|KIF23|SPRY2|TACC3|TPX2|NUP62|KIF4A|RACGAP1|NUSAP1|SPDL1|SPC25|SAPCD2|WDR62|MZT1	-9.2156	0	6	0	0	-15.8867	6.56581
1	-10.2338	GO:0007051	M1	1	0	GO Biological Processes	19	spindle organization	-10.2338	5.13263	9.0853	24155	187	604	24	3.97351	0.794812	332|891|3832|3925|7283|7756|9055|9126|9493|9793|10460|10615|10982|22974|23636|24137|29127|57405|79000|93323|140609|284403|387103|440145	BIRC5|CCNB1|KIF11|STMN1|TUBG1|ZNF207|PRC1|SMC3|KIF23|CKAP5|TACC3|SPAG5|MAPRE2|TPX2|NUP62|KIF4A|RACGAP1|SPC25|AUNIP|HAUS8|NEK7|WDR62|CENPW|MZT1	-7.95371	0	6	0	0	-15.8867	6.56581
1	-8.74274	GO:0007052	M1	1	0	GO Biological Processes	19	mitotic spindle organization	-8.74274	6.23724	8.77612	24155	109	604	17	2.81457	0.672958	332|891|3832|3925|7283|7756|9055|9126|9493|10460|22974|23636|24137|29127|57405|284403|440145	BIRC5|CCNB1|KIF11|STMN1|TUBG1|ZNF207|PRC1|SMC3|KIF23|TACC3|TPX2|NUP62|KIF4A|RACGAP1|SPC25|WDR62|MZT1	-6.59839	0	6	0	0	-15.8867	6.56581
1	-5.51134	GO:0051225	M1	1	0	GO Biological Processes	19	spindle assembly	-5.51134	4.47907	6.24525	24155	125	604	14	2.31788	0.612258	332|3832|7756|9126|9493|10615|10982|22974|24137|29127|93323|140609|387103|440145	BIRC5|KIF11|ZNF207|SMC3|KIF23|SPAG5|MAPRE2|TPX2|KIF4A|RACGAP1|HAUS8|NEK7|CENPW|MZT1	-3.67092	0	6	0	0	-15.8867	6.56581
1	-4.82843	GO:0090307	M1	1	0	GO Biological Processes	19	mitotic spindle assembly	-4.82843	6.10043	6.28158	24155	59	604	9	1.49007	0.492974	332|3832|7756|9126|9493|22974|24137|29127|440145	BIRC5|KIF11|ZNF207|SMC3|KIF23|TPX2|KIF4A|RACGAP1|MZT1	-3.06719	0	6	0	0	-15.8867	6.56581
1	-14.4786	GO:0071897	M1	1	0	GO Biological Processes	19	DNA biosynthetic process	-14.4786	5.99876	11.3681	24155	200	604	30	4.96689	0.884018	1063|2247|3082|3178|3181|3184|3320|3776|3978|4015|5111|5422|5424|5426|5427|5982|5983|5984|5985|6117|7027|7298|9768|10714|10721|23649|26585|51514|63922|140609	CENPF|FGF2|HGF|HNRNPA1|HNRNPA2B1|HNRNPD|HSP90AA1|KCNK2|LIG1|LOX|PCNA|POLA1|POLD1|POLE|POLE2|RFC2|RFC3|RFC4|RFC5|RPA1|TFDP1|TYMS|PCLAF|POLD3|POLQ|POLA2|GREM1|DTL|CHTF18|NEK7	-11.9014	0	7	1	1	-14.4786	7.75959
1	-11.9202	GO:0051052	M1	1	0	GO Biological Processes	19	regulation of DNA metabolic process	-11.9202	3.71153	9.09635	24155	431	604	40	6.62252	1.01185	672|1786|1956|2247|2305|2956|3014|3082|3178|3181|3184|3320|3569|3776|5111|5515|5982|5983|5984|5985|7027|7468|8091|8914|9126|10635|10721|23529|26585|29980|51750|54069|54962|63922|64710|79000|118460|140609|144455|201163	BRCA1|DNMT1|EGFR|FGF2|FOXM1|MSH6|H2AX|HGF|HNRNPA1|HNRNPA2B1|HNRNPD|HSP90AA1|IL6|KCNK2|PCNA|PPP2CA|RFC2|RFC3|RFC4|RFC5|TFDP1|NSD2|HMGA2|TIMELESS|SMC3|RAD51AP1|POLQ|CLCF1|GREM1|DONSON|RTEL1|MIS18A|TIPIN|CHTF18|NUCKS1|AUNIP|EXOSC6|NEK7|E2F7|FLCN	-9.52691	0	7	0	0	-14.4786	7.75959
1	-9.8733	GO:0051054	M1	1	0	GO Biological Processes	19	positive regulation of DNA metabolic process	-9.8733	4.56046	8.65043	24155	228	604	26	4.30464	0.825839	672|1786|1956|2247|2305|3014|3082|3178|3181|3184|3320|3569|5111|5982|5983|5984|5985|7468|8914|23529|26585|51750|63922|118460|140609|144455	BRCA1|DNMT1|EGFR|FGF2|FOXM1|H2AX|HGF|HNRNPA1|HNRNPA2B1|HNRNPD|HSP90AA1|IL6|PCNA|RFC2|RFC3|RFC4|RFC5|NSD2|TIMELESS|CLCF1|GREM1|RTEL1|CHTF18|EXOSC6|NEK7|E2F7	-7.63854	0	7	0	0	-14.4786	7.75959
1	-8.01433	GO:2000573	M1	1	0	GO Biological Processes	19	positive regulation of DNA biosynthetic process	-8.01433	7.75959	8.8729	24155	67	604	13	2.15232	0.590487	2247|3082|3178|3181|3184|3320|5982|5983|5984|5985|26585|63922|140609	FGF2|HGF|HNRNPA1|HNRNPA2B1|HNRNPD|HSP90AA1|RFC2|RFC3|RFC4|RFC5|GREM1|CHTF18|NEK7	-5.94476	0	7	0	0	-14.4786	7.75959
1	-6.87987	GO:2000278	M1	1	0	GO Biological Processes	19	regulation of DNA biosynthetic process	-6.87987	5.35603	7.3997	24155	112	604	15	2.48344	0.63321	2247|3082|3178|3181|3184|3320|3776|5982|5983|5984|5985|7027|26585|63922|140609	FGF2|HGF|HNRNPA1|HNRNPA2B1|HNRNPD|HSP90AA1|KCNK2|RFC2|RFC3|RFC4|RFC5|TFDP1|GREM1|CHTF18|NEK7	-4.90673	0	7	0	0	-14.4786	7.75959
1	-2.71921	GO:0051973	M1	1	0	GO Biological Processes	19	positive regulation of telomerase activity	-2.71921	5.55441	4.37937	24155	36	604	5	0.827815	0.368674	3181|3184|3320|26585|140609	HNRNPA2B1|HNRNPD|HSP90AA1|GREM1|NEK7	-1.27872	0	7	0	0	-14.4786	7.75959
1	-2.08911	GO:1904355	M1	1	0	GO Biological Processes	19	positive regulation of telomere capping	-2.08911	7.05736	4.00097	24155	17	604	3	0.496689	0.28605	3184|51750|140609	HNRNPD|RTEL1|NEK7	-0.803783	0	7	0	0	-14.4786	7.75959
1	-2.05747	GO:0032206	M1	1	0	GO Biological Processes	19	positive regulation of telomere maintenance	-2.05747	3.92076	3.34383	24155	51	604	5	0.827815	0.368674	3178|3181|3184|51750|140609	HNRNPA1|HNRNPA2B1|HNRNPD|RTEL1|NEK7	-0.775836	0	7	0	0	-14.4786	7.75959
1	-2.05747	GO:0051972	M1	1	0	GO Biological Processes	19	regulation of telomerase activity	-2.05747	3.92076	3.34383	24155	51	604	5	0.827815	0.368674	3181|3184|3320|26585|140609	HNRNPA2B1|HNRNPD|HSP90AA1|GREM1|NEK7	-0.775836	0	7	0	0	-14.4786	7.75959
1	-14.2547	GO:0051321	M1	1	0	GO Biological Processes	19	meiotic cell cycle	-14.2547	5.30011	10.9228	24155	249	604	33	5.46358	0.92474	699|701|993|994|2177|2827|2956|3014|3976|5515|5932|6117|7283|8438|9088|9126|9156|9184|9232|9319|9918|10051|10592|23310|25788|26255|29781|29893|54888|55329|55706|84057|151648	BUB1|BUB1B|CDC25A|CDC25B|FANCD2|GPR3|MSH6|H2AX|LIF|PPP2CA|RBBP8|RPA1|TUBG1|RAD54L|PKMYT1|SMC3|EXO1|BUB3|PTTG1|TRIP13|NCAPD2|SMC4|SMC2|NCAPD3|RAD54B|PTTG3P|NCAPH2|PSMC3IP|NSUN2|MNS1|NDC1|MND1|SGO1	-11.708	0	8	1	1	-14.2547	6.15257
1	-10.1846	GO:1903046	M1	1	0	GO Biological Processes	19	meiotic cell cycle process	-10.1846	5.10533	9.04957	24155	188	604	24	3.97351	0.794812	699|701|993|994|2177|2827|2956|3976|7283|8438|9232|9319|9918|10051|10592|23310|25788|26255|29781|29893|54888|55706|84057|151648	BUB1|BUB1B|CDC25A|CDC25B|FANCD2|GPR3|MSH6|LIF|TUBG1|RAD54L|PTTG1|TRIP13|NCAPD2|SMC4|SMC2|NCAPD3|RAD54B|PTTG3P|NCAPH2|PSMC3IP|NSUN2|NDC1|MND1|SGO1	-7.9085	0	8	0	0	-14.2547	6.15257
1	-6.46284	GO:0140013	M1	1	0	GO Biological Processes	19	meiotic nuclear division	-6.46284	4.18518	6.71359	24155	172	604	18	2.98013	0.691878	699|701|994|2177|2827|3976|8438|9232|9319|10051|10592|25788|26255|29781|29893|55706|84057|151648	BUB1|BUB1B|CDC25B|FANCD2|GPR3|LIF|RAD54L|PTTG1|TRIP13|SMC4|SMC2|RAD54B|PTTG3P|NCAPH2|PSMC3IP|NDC1|MND1|SGO1	-4.52142	0	8	0	0	-14.2547	6.15257
1	-5.33638	GO:0070192	M1	1	0	GO Biological Processes	19	chromosome organization involved in meiotic cell cycle	-5.33638	6.15257	6.66148	24155	65	604	10	1.65563	0.519204	699|701|2177|9319|9918|10051|10592|23310|29781|55706	BUB1|BUB1B|FANCD2|TRIP13|NCAPD2|SMC4|SMC2|NCAPD3|NCAPH2|NDC1	-3.51577	0	8	0	0	-14.2547	6.15257
1	-4.81837	GO:0045132	M1	1	0	GO Biological Processes	19	meiotic chromosome segregation	-4.81837	4.88788	5.91765	24155	90	604	11	1.82119	0.544087	699|701|2177|9232|9319|10051|10592|26255|29781|55706|151648	BUB1|BUB1B|FANCD2|PTTG1|TRIP13|SMC4|SMC2|PTTG3P|NCAPH2|NDC1|SGO1	-3.05954	0	8	0	0	-14.2547	6.15257
1	-4.35032	GO:0061982	M1	1	0	GO Biological Processes	19	meiosis I cell cycle process	-4.35032	4.03278	5.31118	24155	119	604	12	1.98675	0.567801	993|994|2177|2956|8438|9232|9319|25788|26255|29893|55706|84057	CDC25A|CDC25B|FANCD2|MSH6|RAD54L|PTTG1|TRIP13|RAD54B|PTTG3P|PSMC3IP|NDC1|MND1	-2.6413	0	8	0	0	-14.2547	6.15257
1	-3.23074	GO:0007127	M1	1	0	GO Biological Processes	19	meiosis I	-3.23074	3.50805	4.29853	24155	114	604	10	1.65563	0.519204	994|2177|8438|9232|9319|25788|26255|29893|55706|84057	CDC25B|FANCD2|RAD54L|PTTG1|TRIP13|RAD54B|PTTG3P|PSMC3IP|NDC1|MND1	-1.68916	0	8	0	0	-14.2547	6.15257
1	-12.2494	GO:0006323	M1	1	0	GO Biological Processes	19	DNA packaging	-12.2494	5.33223	10.0977	24155	210	604	28	4.63576	0.855529	891|3014|3070|3159|4171|4678|8091|8208|8364|8815|9555|9918|10036|10051|10592|11339|23310|29781|51203|54069|55723|55839|64105|64151|64946|79019|79682|387103	CCNB1|H2AX|HELLS|HMGA1|MCM2|NASP|HMGA2|CHAF1B|H4C3|BANF1|MACROH2A1|NCAPD2|CHAF1A|SMC4|SMC2|OIP5|NCAPD3|NCAPH2|NUSAP1|MIS18A|ASF1B|CENPN|CENPK|NCAPG|CENPH|CENPM|CENPU|CENPW	-9.84038	0	9	1	1	-12.2494	26.6611
1	-9.07278	GO:0065004	M1	1	0	GO Biological Processes	19	protein-DNA complex assembly	-9.07278	4.19268	8.09333	24155	248	604	26	4.30464	0.825839	1063|3014|3070|4171|4172|4173|4174|4175|4176|4678|5701|6117|8208|8318|8364|9555|10036|11339|54069|55723|55839|64105|64946|79019|79682|387103	CENPF|H2AX|HELLS|MCM2|MCM3|MCM4|MCM5|MCM6|MCM7|NASP|PSMC2|RPA1|CHAF1B|CDC45|H4C3|MACROH2A1|CHAF1A|OIP5|MIS18A|ASF1B|CENPN|CENPK|CENPH|CENPM|CENPU|CENPW	-6.89825	0	9	0	0	-12.2494	26.6611
1	-8.32889	GO:0071824	M1	1	0	GO Biological Processes	19	protein-DNA complex subunit organization	-8.32889	3.74922	7.5165	24155	288	604	27	4.4702	0.840842	1063|3014|3070|3159|4171|4172|4173|4174|4175|4176|4678|5701|6117|8208|8318|8364|9555|10036|11339|54069|55723|55839|64105|64946|79019|79682|387103	CENPF|H2AX|HELLS|HMGA1|MCM2|MCM3|MCM4|MCM5|MCM6|MCM7|NASP|PSMC2|RPA1|CHAF1B|CDC45|H4C3|MACROH2A1|CHAF1A|OIP5|MIS18A|ASF1B|CENPN|CENPK|CENPH|CENPM|CENPU|CENPW	-6.22884	0	9	0	0	-12.2494	26.6611
1	-7.95977	GO:0034508	M1	1	0	GO Biological Processes	19	centromere complex assembly	-7.95977	8.56965	9.08195	24155	56	604	12	1.98675	0.567801	1063|3070|4678|8364|11339|54069|55839|64105|64946|79019|79682|387103	CENPF|HELLS|NASP|H4C3|OIP5|MIS18A|CENPN|CENPK|CENPH|CENPM|CENPU|CENPW	-5.89265	0	9	0	0	-12.2494	26.6611
1	-7.6715	GO:0031055	M1	1	0	GO Biological Processes	19	chromatin remodeling at centromere	-7.6715	9.16477	9.06779	24155	48	604	11	1.82119	0.544087	3070|4678|8364|11339|54069|55839|64105|64946|79019|79682|387103	HELLS|NASP|H4C3|OIP5|MIS18A|CENPN|CENPK|CENPH|CENPM|CENPU|CENPW	-5.63951	0	9	0	0	-12.2494	26.6611
1	-7.45359	GO:0031497	M1	1	0	GO Biological Processes	19	chromatin assembly	-7.45359	4.60511	7.44138	24155	165	604	19	3.1457	0.710231	3014|3070|3159|4171|4678|8091|8208|8364|9555|10036|11339|54069|55723|55839|64105|64946|79019|79682|387103	H2AX|HELLS|HMGA1|MCM2|NASP|HMGA2|CHAF1B|H4C3|MACROH2A1|CHAF1A|OIP5|MIS18A|ASF1B|CENPN|CENPK|CENPH|CENPM|CENPU|CENPW	-5.4414	0	9	0	0	-12.2494	26.6611
1	-7.10352	GO:0006336	M1	1	0	GO Biological Processes	19	DNA replication-independent nucleosome assembly	-7.10352	8.14646	8.41935	24155	54	604	11	1.82119	0.544087	4678|8364|11339|54069|55723|55839|64105|64946|79019|79682|387103	NASP|H4C3|OIP5|MIS18A|ASF1B|CENPN|CENPK|CENPH|CENPM|CENPU|CENPW	-5.11026	0	9	0	0	-12.2494	26.6611
1	-7.01644	GO:0034724	M1	1	0	GO Biological Processes	19	DNA replication-independent nucleosome organization	-7.01644	7.99834	8.32102	24155	55	604	11	1.82119	0.544087	4678|8364|11339|54069|55723|55839|64105|64946|79019|79682|387103	NASP|H4C3|OIP5|MIS18A|ASF1B|CENPN|CENPK|CENPH|CENPM|CENPU|CENPW	-5.03335	0	9	0	0	-12.2494	26.6611
1	-6.98985	GO:0034080	M1	1	0	GO Biological Processes	19	CENP-A containing nucleosome assembly	-6.98985	9.08903	8.60049	24155	44	604	10	1.65563	0.519204	4678|8364|11339|54069|55839|64105|64946|79019|79682|387103	NASP|H4C3|OIP5|MIS18A|CENPN|CENPK|CENPH|CENPM|CENPU|CENPW	-5.01473	0	9	0	0	-12.2494	26.6611
1	-6.98985	GO:0061641	M1	1	0	GO Biological Processes	19	CENP-A containing chromatin organization	-6.98985	9.08903	8.60049	24155	44	604	10	1.65563	0.519204	4678|8364|11339|54069|55839|64105|64946|79019|79682|387103	NASP|H4C3|OIP5|MIS18A|CENPN|CENPK|CENPH|CENPM|CENPU|CENPW	-5.01473	0	9	0	0	-12.2494	26.6611
1	-6.5433	R-HSA-606279	M1	1	0	Reactome Gene Sets	6	Deposition of new CENPA-containing nucleosomes at the centromere	-6.5433	6.48514	7.56789	24155	74	604	12	1.98675	0.567801	3014|3015|8364|11339|54069|55839|64105|64946|79019|79682|94239|387103	H2AX|H2AZ1|H4C3|OIP5|MIS18A|CENPN|CENPK|CENPH|CENPM|CENPU|H2AZ2|CENPW	-4.59683	0	9	0	0	-12.2494	26.6611
1	-6.5433	R-HSA-774815	M1	1	0	Reactome Gene Sets	6	Nucleosome assembly	-6.5433	6.48514	7.56789	24155	74	604	12	1.98675	0.567801	3014|3015|8364|11339|54069|55839|64105|64946|79019|79682|94239|387103	H2AX|H2AZ1|H4C3|OIP5|MIS18A|CENPN|CENPK|CENPH|CENPM|CENPU|H2AZ2|CENPW	-4.59683	0	9	0	0	-12.2494	26.6611
1	-6.44195	GO:0006333	M1	1	0	GO Biological Processes	19	chromatin assembly or disassembly	-6.44195	3.97823	6.61766	24155	191	604	19	3.1457	0.710231	3014|3070|3159|4171|4678|8091|8208|8364|9555|10036|11339|54069|55723|55839|64105|64946|79019|79682|387103	H2AX|HELLS|HMGA1|MCM2|NASP|HMGA2|CHAF1B|H4C3|MACROH2A1|CHAF1A|OIP5|MIS18A|ASF1B|CENPN|CENPK|CENPH|CENPM|CENPU|CENPW	-4.50822	0	9	0	0	-12.2494	26.6611
1	-6.29575	GO:0051383	M1	1	0	GO Biological Processes	19	kinetochore organization	-6.29575	13.3306	9.05288	24155	21	604	7	1.15894	0.435493	1063|10051|10592|55839|64105|64946|387103	CENPF|SMC4|SMC2|CENPN|CENPK|CENPH|CENPW	-4.38305	0	9	0	0	-12.2494	26.6611
1	-6.12307	GO:0006334	M1	1	0	GO Biological Processes	19	nucleosome assembly	-6.12307	4.41288	6.60111	24155	145	604	16	2.64901	0.653421	3014|4171|4678|8208|8364|9555|10036|11339|54069|55723|55839|64105|64946|79019|79682|387103	H2AX|MCM2|NASP|CHAF1B|H4C3|MACROH2A1|CHAF1A|OIP5|MIS18A|ASF1B|CENPN|CENPK|CENPH|CENPM|CENPU|CENPW	-4.22217	0	9	0	0	-12.2494	26.6611
1	-5.66325	GO:0043486	M1	1	0	GO Biological Processes	19	histone exchange	-5.66325	6.66529	7.03627	24155	60	604	10	1.65563	0.519204	4678|8364|11339|54069|55839|64105|64946|79019|79682|387103	NASP|H4C3|OIP5|MIS18A|CENPN|CENPK|CENPH|CENPM|CENPU|CENPW	-3.8096	0	9	0	0	-12.2494	26.6611
1	-5.40658	CORUM:7394	M1	1	0	CORUM	33	CENP-H-I complex	-5.40658	18.1781	9.12587	24155	11	604	5	0.827815	0.368674	55839|64105|64946|79019|79682	CENPN|CENPK|CENPH|CENPM|CENPU	-3.579	0	9	0	0	-12.2494	26.6611
1	-5.38884	GO:0034728	M1	1	0	GO Biological Processes	19	nucleosome organization	-5.38884	3.69489	5.87645	24155	184	604	17	2.81457	0.672958	3014|3159|4171|4678|8208|8364|9555|10036|11339|54069|55723|55839|64105|64946|79019|79682|387103	H2AX|HMGA1|MCM2|NASP|CHAF1B|H4C3|MACROH2A1|CHAF1A|OIP5|MIS18A|ASF1B|CENPN|CENPK|CENPH|CENPM|CENPU|CENPW	-3.56266	0	9	0	0	-12.2494	26.6611
1	-5.25343	CORUM:927	M1	1	0	CORUM	33	CENP-A NAC complex	-5.25343	26.6611	10.0672	24155	6	604	4	0.662252	0.330028	55839|64946|79019|79682	CENPN|CENPH|CENPM|CENPU	-3.44104	0	9	0	0	-12.2494	26.6611
1	-5.18154	CORUM:1179	M1	1	0	CORUM	33	CENP-A NAC-CAD complex	-5.18154	16.6632	8.69129	24155	12	604	5	0.827815	0.368674	55839|64105|64946|79019|79682	CENPN|CENPK|CENPH|CENPM|CENPU	-3.3732	0	9	0	0	-12.2494	26.6611
1	-4.91272	GO:0043044	M1	1	0	GO Biological Processes	19	ATP-dependent chromatin remodeling	-4.91272	4.99897	6.01847	24155	88	604	11	1.82119	0.544087	86|4678|8364|11339|54069|55839|64105|64946|79019|79682|387103	ACTL6A|NASP|H4C3|OIP5|MIS18A|CENPN|CENPK|CENPH|CENPM|CENPU|CENPW	-3.13925	0	9	0	0	-12.2494	26.6611
1	-4.83506	GO:0006338	M1	1	0	GO Biological Processes	19	chromatin remodeling	-4.83506	3.51576	5.45571	24155	182	604	16	2.64901	0.653421	86|3070|3159|4602|4678|8091|8364|11339|54069|55839|64105|64946|79019|79682|125476|387103	ACTL6A|HELLS|HMGA1|MYB|NASP|HMGA2|H4C3|OIP5|MIS18A|CENPN|CENPK|CENPH|CENPM|CENPU|INO80C|CENPW	-3.07261	0	9	0	0	-12.2494	26.6611
1	-4.47608	GO:0051382	M1	1	0	GO Biological Processes	19	kinetochore assembly	-4.47608	12.4974	7.36731	24155	16	604	5	0.827815	0.368674	1063|55839|64105|64946|387103	CENPF|CENPN|CENPK|CENPH|CENPW	-2.75514	0	9	0	0	-12.2494	26.6611
1	-3.54292	CORUM:929	M1	1	0	CORUM	33	CEN complex	-3.54292	6.48514	5.3472	24155	37	604	6	0.993377	0.403525	9493|29127|64105|64946|79019|79682	KIF23|RACGAP1|CENPK|CENPH|CENPM|CENPU	-1.94719	0	9	0	0	-12.2494	26.6611
1	-11.2304	M14	M1	1	0	Canonical Pathways	11	PID AURORA B PATHWAY	-11.2304	13.3306	12.3416	24155	39	604	13	2.15232	0.590487	332|699|3925|9493|9918|10051|10112|10592|23468|29127|54888|64151|151648	BIRC5|BUB1|STMN1|KIF23|NCAPD2|SMC4|KIF20A|SMC2|CBX5|RACGAP1|NSUN2|NCAPG|SGO1	-8.88595	0	10	1	1	-11.2304	33.3264
1	-7.2478	GO:0010032	M1	1	0	GO Biological Processes	19	meiotic chromosome condensation	-7.2478	33.3264	12.6821	24155	6	604	5	0.827815	0.368674	9918|10051|10592|23310|29781	NCAPD2|SMC4|SMC2|NCAPD3|NCAPH2	-5.24623	0	10	0	0	-11.2304	33.3264
1	-7.03453	GO:0007076	M1	1	0	GO Biological Processes	19	mitotic chromosome condensation	-7.03453	16.4672	10.2163	24155	17	604	7	1.15894	0.435493	9918|10051|10592|23310|29781|51203|64151	NCAPD2|SMC4|SMC2|NCAPD3|NCAPH2|NUSAP1|NCAPG	-5.04741	0	10	0	0	-11.2304	33.3264
1	-6.69965	GO:0030261	M1	1	0	GO Biological Processes	19	chromosome condensation	-6.69965	8.50888	8.25186	24155	47	604	10	1.65563	0.519204	891|8091|8815|9918|10051|10592|23310|29781|51203|64151	CCNB1|HMGA2|BANF1|NCAPD2|SMC4|SMC2|NCAPD3|NCAPH2|NUSAP1|NCAPG	-4.74563	0	10	0	0	-11.2304	33.3264
1	-5.72184	CORUM:10	M1	1	0	CORUM	33	Condensin I complex	-5.72184	31.9934	11.0995	24155	5	604	4	0.662252	0.330028	9918|10051|10592|64151	NCAPD2|SMC4|SMC2|NCAPG	-3.86218	0	10	0	0	-11.2304	33.3264
1	-5.72184	CORUM:157	M1	1	0	CORUM	33	Condensin I complex	-5.72184	31.9934	11.0995	24155	5	604	4	0.662252	0.330028	9918|10051|10592|64151	NCAPD2|SMC4|SMC2|NCAPG	-3.86218	0	10	0	0	-11.2304	33.3264
1	-5.72184	CORUM:160	M1	1	0	CORUM	33	Condensin II	-5.72184	31.9934	11.0995	24155	5	604	4	0.662252	0.330028	10051|10592|23310|29781	SMC4|SMC2|NCAPD3|NCAPH2	-3.86218	0	10	0	0	-11.2304	33.3264
1	-5.72184	CORUM:167	M1	1	0	CORUM	33	Condensin I complex	-5.72184	31.9934	11.0995	24155	5	604	4	0.662252	0.330028	9918|10051|10592|64151	NCAPD2|SMC4|SMC2|NCAPG	-3.86218	0	10	0	0	-11.2304	33.3264
1	-5.40658	R-HSA-2514853	M1	1	0	Reactome Gene Sets	6	Condensation of Prometaphase Chromosomes	-5.40658	18.1781	9.12587	24155	11	604	5	0.827815	0.368674	891|9918|10051|10592|64151	CCNB1|NCAPD2|SMC4|SMC2|NCAPG	-3.579	0	10	0	0	-11.2304	33.3264
1	-4.89416	CORUM:159	M1	1	0	CORUM	33	Condensin I-PARP-1-XRCC1 complex	-4.89416	22.8524	9.26011	24155	7	604	4	0.662252	0.330028	9918|10051|10592|64151	NCAPD2|SMC4|SMC2|NCAPG	-3.12316	0	10	0	0	-11.2304	33.3264
1	-3.29661	CORUM:49	M1	1	0	CORUM	33	DNMT3B complex	-3.29661	17.1393	6.83914	24155	7	604	3	0.496689	0.28605	10051|10592|24137	SMC4|SMC2|KIF4A	-1.74325	0	10	0	0	-11.2304	33.3264
1	-11.0685	R-HSA-68875	M1	1	0	Reactome Gene Sets	6	Mitotic Prophase	-11.0685	6.1959	9.94466	24155	142	604	22	3.64238	0.762285	891|3014|3015|4000|4927|5515|5578|7112|8364|8815|9631|10051|10592|10762|23165|23310|23511|23636|29781|55706|94239|140609	CCNB1|H2AX|H2AZ1|LMNA|NUP88|PPP2CA|PRKCA|TMPO|H4C3|BANF1|NUP155|SMC4|SMC2|NUP50|NUP205|NCAPD3|NUP188|NUP62|NCAPH2|NDC1|H2AZ2|NEK7	-8.74655	0	11	1	1	-11.0685	12.1187
1	-9.46672	R-HSA-2980766	M1	1	0	Reactome Gene Sets	6	Nuclear Envelope Breakdown	-9.46672	9.99793	10.402	24155	52	604	13	2.15232	0.590487	891|4000|4927|5578|7112|8815|9631|10762|23165|23511|23636|55706|140609	CCNB1|LMNA|NUP88|PRKCA|TMPO|BANF1|NUP155|NUP50|NUP205|NUP188|NUP62|NDC1|NEK7	-7.26645	0	11	0	0	-11.0685	12.1187
1	-9.0234	R-HSA-8953854	M1	1	0	Reactome Gene Sets	6	Metabolism of RNA	-9.0234	2.72536	7.28101	24155	675	604	46	7.61589	1.0793	1479|1665|2963|3178|3181|3184|4670|4927|5393|5515|5578|5701|5708|5718|6426|6427|6627|6637|7534|8683|9125|9582|9631|10197|10212|10250|10262|10436|10643|10762|10969|11100|11340|23165|23511|23636|26097|29107|51106|51118|54888|55339|55706|57570|116832|118460	CSTF3|DHX15|GTF2F2|HNRNPA1|HNRNPA2B1|HNRNPD|HNRNPM|NUP88|EXOSC9|PPP2CA|PRKCA|PSMC2|PSMD2|PSMD12|SRSF1|SRSF2|SNRPA1|SNRPG|YWHAZ|SRSF9|CNOT9|APOBEC3B|NUP155|PSME3|DDX39A|SRRM1|SF3B4|EMG1|IGF2BP3|NUP50|EBNA1BP2|HNRNPUL1|EXOSC8|NUP205|NUP188|NUP62|CHTOP|NXT1|TFB1M|UTP11|NSUN2|WDR33|NDC1|TRMT5|RPL39L|EXOSC6	-6.85508	0	11	0	0	-11.0685	12.1187
1	-8.9163	GO:0006405	M1	1	0	GO Biological Processes	19	RNA export from nucleus	-8.9163	5.62846	8.63626	24155	135	604	19	3.1457	0.710231	3178|3181|3692|4927|6426|6427|8683|9631|10212|10250|10657|10762|23165|23511|23636|26097|29107|55339|55706	HNRNPA1|HNRNPA2B1|EIF6|NUP88|SRSF1|SRSF2|SRSF9|NUP155|DDX39A|SRRM1|KHDRBS1|NUP50|NUP205|NUP188|NUP62|CHTOP|NXT1|WDR33|NDC1	-6.75409	0	11	0	0	-11.0685	12.1187
1	-8.62522	R-HSA-72202	M1	1	0	Reactome Gene Sets	6	Transport of Mature Transcript to Cytoplasm	-8.62522	7.14138	9.02956	24155	84	604	15	2.48344	0.63321	4927|6426|6427|8683|9631|10212|10250|10762|23165|23511|23636|26097|29107|55339|55706	NUP88|SRSF1|SRSF2|SRSF9|NUP155|DDX39A|SRRM1|NUP50|NUP205|NUP188|NUP62|CHTOP|NXT1|WDR33|NDC1	-6.49237	0	11	0	0	-11.0685	12.1187
1	-8.40549	GO:0051168	M1	1	0	GO Biological Processes	19	nuclear export	-8.40549	4.53514	7.91706	24155	194	604	22	3.64238	0.762285	1434|3178|3181|3692|4927|5784|6426|6427|8683|9631|10212|10250|10657|10762|23165|23511|23636|26097|29107|51512|55339|55706	CSE1L|HNRNPA1|HNRNPA2B1|EIF6|NUP88|PTPN14|SRSF1|SRSF2|SRSF9|NUP155|DDX39A|SRRM1|KHDRBS1|NUP50|NUP205|NUP188|NUP62|CHTOP|NXT1|GTSE1|WDR33|NDC1	-6.28661	0	11	0	0	-11.0685	12.1187
1	-8.38532	GO:0051169	M1	1	0	GO Biological Processes	19	nuclear transport	-8.38532	3.46749	7.4034	24155	346	604	30	4.96689	0.884018	1434|3159|3178|3181|3692|4000|4927|5569|5743|5784|6426|6427|6637|8683|8815|9631|10212|10250|10657|10762|11168|23165|23511|23636|26097|29107|51512|55339|55612|55706	CSE1L|HMGA1|HNRNPA1|HNRNPA2B1|EIF6|LMNA|NUP88|PKIA|PTGS2|PTPN14|SRSF1|SRSF2|SNRPG|SRSF9|BANF1|NUP155|DDX39A|SRRM1|KHDRBS1|NUP50|PSIP1|NUP205|NUP188|NUP62|CHTOP|NXT1|GTSE1|WDR33|FERMT1|NDC1	-6.2719	0	11	0	0	-11.0685	12.1187
1	-8.35314	R-HSA-159236	M1	1	0	Reactome Gene Sets	6	Transport of Mature mRNA derived from an Intron-Containing Transcript	-8.35314	7.46512	8.98023	24155	75	604	14	2.31788	0.612258	4927|6426|6427|8683|9631|10212|10250|10762|23165|23511|23636|26097|29107|55706	NUP88|SRSF1|SRSF2|SRSF9|NUP155|DDX39A|SRRM1|NUP50|NUP205|NUP188|NUP62|CHTOP|NXT1|NDC1	-6.24442	0	11	0	0	-11.0685	12.1187
1	-8.31053	R-HSA-180910	M1	1	0	Reactome Gene Sets	6	Vpr-mediated nuclear import of PICs	-8.31053	12.1187	10.2356	24155	33	604	10	1.65563	0.519204	3159|4927|8815|9631|10762|11168|23165|23511|23636|55706	HMGA1|NUP88|BANF1|NUP155|NUP50|PSIP1|NUP205|NUP188|NUP62|NDC1	-6.2131	0	11	0	0	-11.0685	12.1187
1	-7.90116	R-HSA-176033	M1	1	0	Reactome Gene Sets	6	Interactions of Vpr with host cellular proteins	-7.90116	11.1088	9.72031	24155	36	604	10	1.65563	0.519204	3159|4927|8815|9631|10762|11168|23165|23511|23636|55706	HMGA1|NUP88|BANF1|NUP155|NUP50|PSIP1|NUP205|NUP188|NUP62|NDC1	-5.8413	0	11	0	0	-11.0685	12.1187
1	-7.75953	GO:0006406	M1	1	0	GO Biological Processes	19	mRNA export from nucleus	-7.75953	5.76457	8.05732	24155	111	604	16	2.64901	0.653421	3181|4927|6426|6427|8683|9631|10212|10250|10762|23165|23511|23636|26097|29107|55339|55706	HNRNPA2B1|NUP88|SRSF1|SRSF2|SRSF9|NUP155|DDX39A|SRRM1|NUP50|NUP205|NUP188|NUP62|CHTOP|NXT1|WDR33|NDC1	-5.71374	0	11	0	0	-11.0685	12.1187
1	-7.75953	GO:0071427	M1	1	0	GO Biological Processes	19	mRNA-containing ribonucleoprotein complex export from nucleus	-7.75953	5.76457	8.05732	24155	111	604	16	2.64901	0.653421	3181|4927|6426|6427|8683|9631|10212|10250|10762|23165|23511|23636|26097|29107|55339|55706	HNRNPA2B1|NUP88|SRSF1|SRSF2|SRSF9|NUP155|DDX39A|SRRM1|NUP50|NUP205|NUP188|NUP62|CHTOP|NXT1|WDR33|NDC1	-5.71374	0	11	0	0	-11.0685	12.1187
1	-7.73247	GO:0050657	M1	1	0	GO Biological Processes	19	nucleic acid transport	-7.73247	4.35143	7.4861	24155	193	604	21	3.47682	0.745399	3178|3181|3692|4927|6426|6427|8683|9631|9793|10212|10250|10643|10657|10762|23165|23511|23636|26097|29107|55339|55706	HNRNPA1|HNRNPA2B1|EIF6|NUP88|SRSF1|SRSF2|SRSF9|NUP155|CKAP5|DDX39A|SRRM1|IGF2BP3|KHDRBS1|NUP50|NUP205|NUP188|NUP62|CHTOP|NXT1|WDR33|NDC1	-5.69368	0	11	0	0	-11.0685	12.1187
1	-7.73247	GO:0050658	M1	1	0	GO Biological Processes	19	RNA transport	-7.73247	4.35143	7.4861	24155	193	604	21	3.47682	0.745399	3178|3181|3692|4927|6426|6427|8683|9631|9793|10212|10250|10643|10657|10762|23165|23511|23636|26097|29107|55339|55706	HNRNPA1|HNRNPA2B1|EIF6|NUP88|SRSF1|SRSF2|SRSF9|NUP155|CKAP5|DDX39A|SRRM1|IGF2BP3|KHDRBS1|NUP50|NUP205|NUP188|NUP62|CHTOP|NXT1|WDR33|NDC1	-5.69368	0	11	0	0	-11.0685	12.1187
1	-7.71031	GO:0071426	M1	1	0	GO Biological Processes	19	ribonucleoprotein complex export from nucleus	-7.71031	5.35322	7.87703	24155	127	604	17	2.81457	0.672958	3181|3692|4927|6426|6427|8683|9631|10212|10250|10762|23165|23511|23636|26097|29107|55339|55706	HNRNPA2B1|EIF6|NUP88|SRSF1|SRSF2|SRSF9|NUP155|DDX39A|SRRM1|NUP50|NUP205|NUP188|NUP62|CHTOP|NXT1|WDR33|NDC1	-5.67607	0	11	0	0	-11.0685	12.1187
1	-7.65846	GO:0071166	M1	1	0	GO Biological Processes	19	ribonucleoprotein complex localization	-7.65846	5.3114	7.83217	24155	128	604	17	2.81457	0.672958	3181|3692|4927|6426|6427|8683|9631|10212|10250|10762|23165|23511|23636|26097|29107|55339|55706	HNRNPA2B1|EIF6|NUP88|SRSF1|SRSF2|SRSF9|NUP155|DDX39A|SRRM1|NUP50|NUP205|NUP188|NUP62|CHTOP|NXT1|WDR33|NDC1	-5.62872	0	11	0	0	-11.0685	12.1187
1	-7.6143	GO:0051236	M1	1	0	GO Biological Processes	19	establishment of RNA localization	-7.6143	4.28483	7.3946	24155	196	604	21	3.47682	0.745399	3178|3181|3692|4927|6426|6427|8683|9631|9793|10212|10250|10643|10657|10762|23165|23511|23636|26097|29107|55339|55706	HNRNPA1|HNRNPA2B1|EIF6|NUP88|SRSF1|SRSF2|SRSF9|NUP155|CKAP5|DDX39A|SRRM1|IGF2BP3|KHDRBS1|NUP50|NUP205|NUP188|NUP62|CHTOP|NXT1|WDR33|NDC1	-5.58901	0	11	0	0	-11.0685	12.1187
1	-7.58913	GO:0006611	M1	1	0	GO Biological Processes	19	protein export from nucleus	-7.58913	4.46835	7.4588	24155	179	604	20	3.31126	0.728058	1434|3181|3692|4927|5784|6426|6427|8683|9631|10212|10250|10762|23165|23511|23636|26097|29107|51512|55339|55706	CSE1L|HNRNPA2B1|EIF6|NUP88|PTPN14|SRSF1|SRSF2|SRSF9|NUP155|DDX39A|SRRM1|NUP50|NUP205|NUP188|NUP62|CHTOP|NXT1|GTSE1|WDR33|NDC1	-5.56605	0	11	0	0	-11.0685	12.1187
1	-7.28302	GO:0051028	M1	1	0	GO Biological Processes	19	mRNA transport	-7.28302	4.73586	7.39926	24155	152	604	18	2.98013	0.691878	3178|3181|4927|6426|6427|8683|9631|10212|10250|10643|10762|23165|23511|23636|26097|29107|55339|55706	HNRNPA1|HNRNPA2B1|NUP88|SRSF1|SRSF2|SRSF9|NUP155|DDX39A|SRRM1|IGF2BP3|NUP50|NUP205|NUP188|NUP62|CHTOP|NXT1|WDR33|NDC1	-5.27935	0	11	0	0	-11.0685	12.1187
1	-7.02267	GO:0006403	M1	1	0	GO Biological Processes	19	RNA localization	-7.02267	3.80874	6.86923	24155	231	604	22	3.64238	0.762285	636|3178|3181|3692|4927|6426|6427|8683|9631|9793|10212|10250|10643|10657|10762|23165|23511|23636|26097|29107|55339|55706	BICD1|HNRNPA1|HNRNPA2B1|EIF6|NUP88|SRSF1|SRSF2|SRSF9|NUP155|CKAP5|DDX39A|SRRM1|IGF2BP3|KHDRBS1|NUP50|NUP205|NUP188|NUP62|CHTOP|NXT1|WDR33|NDC1	-5.03757	0	11	0	0	-11.0685	12.1187
1	-6.84685	R-HSA-3301854	M1	1	0	Reactome Gene Sets	6	Nuclear Pore Complex (NPC) Disassembly	-6.84685	10.2836	8.80176	24155	35	604	9	1.49007	0.492974	891|4927|9631|10762|23165|23511|23636|55706|140609	CCNB1|NUP88|NUP155|NUP50|NUP205|NUP188|NUP62|NDC1|NEK7	-4.87566	0	11	0	0	-11.0685	12.1187
1	-6.82373	R-HSA-162909	M1	1	0	Reactome Gene Sets	6	Host Interactions of HIV factors	-6.82373	4.96021	7.22239	24155	129	604	16	2.64901	0.653421	1794|3159|4927|5701|5708|5718|5902|8815|9631|10197|10762|11168|23165|23511|23636|55706	DOCK2|HMGA1|NUP88|PSMC2|PSMD2|PSMD12|RANBP1|BANF1|NUP155|PSME3|NUP50|PSIP1|NUP205|NUP188|NUP62|NDC1	-4.8545	0	11	0	0	-11.0685	12.1187
1	-6.74694	GO:0006913	M1	1	0	GO Biological Processes	19	nucleocytoplasmic transport	-6.74694	3.14804	6.41651	24155	343	604	27	4.4702	0.840842	1434|3178|3181|3692|4000|4927|5569|5743|5784|6426|6427|6637|8683|9631|10212|10250|10657|10762|23165|23511|23636|26097|29107|51512|55339|55612|55706	CSE1L|HNRNPA1|HNRNPA2B1|EIF6|LMNA|NUP88|PKIA|PTGS2|PTPN14|SRSF1|SRSF2|SNRPG|SRSF9|NUP155|DDX39A|SRRM1|KHDRBS1|NUP50|NUP205|NUP188|NUP62|CHTOP|NXT1|GTSE1|WDR33|FERMT1|NDC1	-4.78158	0	11	0	0	-11.0685	12.1187
1	-6.69956	GO:0015931	M1	1	0	GO Biological Processes	19	nucleobase-containing compound transport	-6.69956	3.6507	6.62294	24155	241	604	22	3.64238	0.762285	3178|3181|3692|4927|6426|6427|8683|9631|9793|10212|10250|10643|10657|10762|23165|23511|23636|26097|29107|55339|55706|57724	HNRNPA1|HNRNPA2B1|EIF6|NUP88|SRSF1|SRSF2|SRSF9|NUP155|CKAP5|DDX39A|SRRM1|IGF2BP3|KHDRBS1|NUP50|NUP205|NUP188|NUP62|CHTOP|NXT1|WDR33|NDC1|EPG5	-4.74563	0	11	0	0	-11.0685	12.1187
1	-6.13152	GO:0031503	M1	1	0	GO Biological Processes	19	protein-containing complex localization	-6.13152	3.27334	6.13852	24155	281	604	23	3.80795	0.778747	332|3181|3692|4927|6426|6427|8683|9631|9912|10212|10250|10762|23165|23511|23636|26097|29107|55339|55706|83903|89891|117178|440145	BIRC5|HNRNPA2B1|EIF6|NUP88|SRSF1|SRSF2|SRSF9|NUP155|ARHGAP44|DDX39A|SRRM1|NUP50|NUP205|NUP188|NUP62|CHTOP|NXT1|WDR33|NDC1|HASPIN|WDR34|SSX2IP|MZT1	-4.22895	0	11	0	0	-11.0685	12.1187
1	-5.84497	R-HSA-4615885	M1	1	0	Reactome Gene Sets	6	SUMOylation of DNA replication proteins	-5.84497	7.99834	7.52508	24155	45	604	9	1.49007	0.492974	332|4927|5111|9631|10762|23165|23511|23636|55706	BIRC5|NUP88|PCNA|NUP155|NUP50|NUP205|NUP188|NUP62|NDC1	-3.96335	0	11	0	0	-11.0685	12.1187
1	-5.84314	R-HSA-4551638	M1	1	0	Reactome Gene Sets	6	SUMOylation of chromatin organization proteins	-5.84314	6.1959	7.02157	24155	71	604	11	1.82119	0.544087	4927|8364|9063|9631|10762|23165|23468|23511|23512|23636|55706	NUP88|H4C3|PIAS2|NUP155|NUP50|NUP205|CBX5|NUP188|SUZ12|NUP62|NDC1	-3.96335	0	11	0	0	-11.0685	12.1187
1	-5.82615	R-HSA-165054	M1	1	0	Reactome Gene Sets	6	Rev-mediated nuclear export of HIV RNA	-5.82615	9.40982	7.85845	24155	34	604	8	1.3245	0.465171	4927|5902|9631|10762|23165|23511|23636|55706	NUP88|RANBP1|NUP155|NUP50|NUP205|NUP188|NUP62|NDC1	-3.94794	0	11	0	0	-11.0685	12.1187
1	-5.62343	R-HSA-177243	M1	1	0	Reactome Gene Sets	6	Interactions of Rev with host cellular proteins	-5.62343	8.88705	7.58393	24155	36	604	8	1.3245	0.465171	4927|5902|9631|10762|23165|23511|23636|55706	NUP88|RANBP1|NUP155|NUP50|NUP205|NUP188|NUP62|NDC1	-3.77718	0	11	0	0	-11.0685	12.1187
1	-5.4854	R-HSA-3108214	M1	1	0	Reactome Gene Sets	6	SUMOylation of DNA damage response and repair proteins	-5.4854	5.7131	6.63362	24155	77	604	11	1.82119	0.544087	672|4927|6117|9063|9126|9631|10762|23165|23511|23636|55706	BRCA1|NUP88|RPA1|PIAS2|SMC3|NUP155|NUP50|NUP205|NUP188|NUP62|NDC1	-3.64642	0	11	0	0	-11.0685	12.1187
1	-5.45328	R-HSA-3108232	M1	1	0	Reactome Gene Sets	6	SUMO E3 ligases SUMOylate target proteins	-5.45328	3.73549	5.93223	24155	182	604	17	2.81457	0.672958	332|672|1786|4927|5111|6117|8364|9063|9126|9631|10762|23165|23468|23511|23512|23636|55706	BIRC5|BRCA1|DNMT1|NUP88|PCNA|RPA1|H4C3|PIAS2|SMC3|NUP155|NUP50|NUP205|CBX5|NUP188|SUZ12|NUP62|NDC1	-3.61861	0	11	0	0	-11.0685	12.1187
1	-5.43409	R-HSA-3232142	M1	1	0	Reactome Gene Sets	6	SUMOylation of ubiquitinylation proteins	-5.43409	8.41931	7.32997	24155	38	604	8	1.3245	0.465171	4927|9063|9631|10762|23165|23511|23636|55706	NUP88|PIAS2|NUP155|NUP50|NUP205|NUP188|NUP62|NDC1	-3.60227	0	11	0	0	-11.0685	12.1187
1	-5.26281	R-HSA-2990846	M1	1	0	Reactome Gene Sets	6	SUMOylation	-5.26281	3.61627	5.76718	24155	188	604	17	2.81457	0.672958	332|672|1786|4927|5111|6117|8364|9063|9126|9631|10762|23165|23468|23511|23512|23636|55706	BIRC5|BRCA1|DNMT1|NUP88|PCNA|RPA1|H4C3|PIAS2|SMC3|NUP155|NUP50|NUP205|CBX5|NUP188|SUZ12|NUP62|NDC1	-3.44633	0	11	0	0	-11.0685	12.1187
1	-5.17188	R-HSA-159231	M1	1	0	Reactome Gene Sets	6	Transport of Mature mRNA Derived from an Intronless Transcript	-5.17188	7.80326	6.98205	24155	41	604	8	1.3245	0.465171	4927|9631|10762|23165|23511|23636|55339|55706	NUP88|NUP155|NUP50|NUP205|NUP188|NUP62|WDR33|NDC1	-3.36622	0	11	0	0	-11.0685	12.1187
1	-5.14933	R-HSA-162906	M1	1	0	Reactome Gene Sets	6	HIV Infection	-5.14933	3.26113	5.55409	24155	233	604	19	3.1457	0.710231	1794|2237|2963|3159|3978|4927|5701|5708|5718|5902|8815|9631|10197|10762|11168|23165|23511|23636|55706	DOCK2|FEN1|GTF2F2|HMGA1|LIG1|NUP88|PSMC2|PSMD2|PSMD12|RANBP1|BANF1|NUP155|PSME3|NUP50|PSIP1|NUP205|NUP188|NUP62|NDC1	-3.35031	0	11	0	0	-11.0685	12.1187
1	-5.09665	R-HSA-3371453	M1	1	0	Reactome Gene Sets	6	Regulation of HSF1-mediated heat shock response	-5.09665	5.7959	6.38882	24155	69	604	10	1.65563	0.519204	3310|4927|6117|9631|10762|10808|23165|23511|23636|55706	HSPA6|NUP88|RPA1|NUP155|NUP50|HSPH1|NUP205|NUP188|NUP62|NDC1	-3.30416	0	11	0	0	-11.0685	12.1187
1	-5.08966	R-HSA-159234	M1	1	0	Reactome Gene Sets	6	Transport of Mature mRNAs Derived from Intronless Transcripts	-5.08966	7.61747	6.87384	24155	42	604	8	1.3245	0.465171	4927|9631|10762|23165|23511|23636|55339|55706	NUP88|NUP155|NUP50|NUP205|NUP188|NUP62|WDR33|NDC1	-3.29846	0	11	0	0	-11.0685	12.1187
1	-5.03577	R-HSA-168271	M1	1	0	Reactome Gene Sets	6	Transport of Ribonucleoproteins into the Host Nucleus	-5.03577	9.03039	7.16475	24155	31	604	7	1.15894	0.435493	4927|9631|10762|23165|23511|23636|55706	NUP88|NUP155|NUP50|NUP205|NUP188|NUP62|NDC1	-3.25352	0	11	0	0	-11.0685	12.1187
1	-5.03577	R-HSA-168333	M1	1	0	Reactome Gene Sets	6	NEP/NS2 Interacts with the Cellular Export Machinery	-5.03577	9.03039	7.16475	24155	31	604	7	1.15894	0.435493	4927|9631|10762|23165|23511|23636|55706	NUP88|NUP155|NUP50|NUP205|NUP188|NUP62|NDC1	-3.25352	0	11	0	0	-11.0685	12.1187
1	-5.03577	R-HSA-170822	M1	1	0	Reactome Gene Sets	6	Regulation of Glucokinase by Glucokinase Regulatory Protein	-5.03577	9.03039	7.16475	24155	31	604	7	1.15894	0.435493	4927|9631|10762|23165|23511|23636|55706	NUP88|NUP155|NUP50|NUP205|NUP188|NUP62|NDC1	-3.25352	0	11	0	0	-11.0685	12.1187
1	-5.03577	R-HSA-5619107	M1	1	0	Reactome Gene Sets	6	Defective TPR may confer susceptibility towards thyroid papillary carcinoma (TPC)	-5.03577	9.03039	7.16475	24155	31	604	7	1.15894	0.435493	4927|9631|10762|23165|23511|23636|55706	NUP88|NUP155|NUP50|NUP205|NUP188|NUP62|NDC1	-3.25352	0	11	0	0	-11.0685	12.1187
1	-5.0098	R-HSA-168325	M1	1	0	Reactome Gene Sets	6	Viral Messenger RNA Synthesis	-5.0098	7.44032	6.76914	24155	43	604	8	1.3245	0.465171	2963|4927|9631|10762|23165|23511|23636|55706	GTF2F2|NUP88|NUP155|NUP50|NUP205|NUP188|NUP62|NDC1	-3.22882	0	11	0	0	-11.0685	12.1187
1	-4.98322	R-HSA-70171	M1	1	0	Reactome Gene Sets	6	Glycolysis	-4.98322	5.63264	6.26039	24155	71	604	10	1.65563	0.519204	4927|5209|5315|5515|9631|10762|23165|23511|23636|55706	NUP88|PFKFB3|PKM|PPP2CA|NUP155|NUP50|NUP205|NUP188|NUP62|NDC1	-3.20601	0	11	0	0	-11.0685	12.1187
1	-4.86521	R-HSA-3371556	M1	1	0	Reactome Gene Sets	6	Cellular response to heat stress	-4.86521	4.9428	5.96768	24155	89	604	11	1.82119	0.544087	3310|3320|4927|6117|9631|10762|10808|23165|23511|23636|55706	HSPA6|HSP90AA1|NUP88|RPA1|NUP155|NUP50|HSPH1|NUP205|NUP188|NUP62|NDC1	-3.09794	0	11	0	0	-11.0685	12.1187
1	-4.84386	R-HSA-168274	M1	1	0	Reactome Gene Sets	6	Export of Viral Ribonucleoproteins from Nucleus	-4.84386	8.48309	6.88874	24155	33	604	7	1.15894	0.435493	4927|9631|10762|23165|23511|23636|55706	NUP88|NUP155|NUP50|NUP205|NUP188|NUP62|NDC1	-3.0802	0	11	0	0	-11.0685	12.1187
1	-4.84386	R-HSA-180746	M1	1	0	Reactome Gene Sets	6	Nuclear import of Rev protein	-4.84386	8.48309	6.88874	24155	33	604	7	1.15894	0.435493	4927|9631|10762|23165|23511|23636|55706	NUP88|NUP155|NUP50|NUP205|NUP188|NUP62|NDC1	-3.0802	0	11	0	0	-11.0685	12.1187
1	-4.75316	GO:0006409	M1	1	0	GO Biological Processes	19	tRNA export from nucleus	-4.75316	8.23359	6.75934	24155	34	604	7	1.15894	0.435493	4927|9631|10762|23165|23511|23636|55706	NUP88|NUP155|NUP50|NUP205|NUP188|NUP62|NDC1	-3.01081	0	11	0	0	-11.0685	12.1187
1	-4.75316	GO:0071431	M1	1	0	GO Biological Processes	19	tRNA-containing ribonucleoprotein complex export from nucleus	-4.75316	8.23359	6.75934	24155	34	604	7	1.15894	0.435493	4927|9631|10762|23165|23511|23636|55706	NUP88|NUP155|NUP50|NUP205|NUP188|NUP62|NDC1	-3.01081	0	11	0	0	-11.0685	12.1187
1	-4.75316	R-HSA-159227	M1	1	0	Reactome Gene Sets	6	Transport of the SLBP independent Mature mRNA	-4.75316	8.23359	6.75934	24155	34	604	7	1.15894	0.435493	4927|9631|10762|23165|23511|23636|55706	NUP88|NUP155|NUP50|NUP205|NUP188|NUP62|NDC1	-3.01081	0	11	0	0	-11.0685	12.1187
1	-4.75316	R-HSA-4085377	M1	1	0	Reactome Gene Sets	6	SUMOylation of SUMOylation proteins	-4.75316	8.23359	6.75934	24155	34	604	7	1.15894	0.435493	4927|9631|10762|23165|23511|23636|55706	NUP88|NUP155|NUP50|NUP205|NUP188|NUP62|NDC1	-3.01081	0	11	0	0	-11.0685	12.1187
1	-4.66566	R-HSA-159230	M1	1	0	Reactome Gene Sets	6	Transport of the SLBP Dependant Mature mRNA	-4.66566	7.99834	6.63512	24155	35	604	7	1.15894	0.435493	4927|9631|10762|23165|23511|23636|55706	NUP88|NUP155|NUP50|NUP205|NUP188|NUP62|NDC1	-2.92561	0	11	0	0	-11.0685	12.1187
1	-4.58116	GO:0051031	M1	1	0	GO Biological Processes	19	tRNA transport	-4.58116	7.77617	6.51575	24155	36	604	7	1.15894	0.435493	4927|9631|10762|23165|23511|23636|55706	NUP88|NUP155|NUP50|NUP205|NUP188|NUP62|NDC1	-2.85245	0	11	0	0	-11.0685	12.1187
1	-4.56674	GO:1900034	M1	1	0	GO Biological Processes	19	regulation of cellular response to heat	-4.56674	5.06224	5.79156	24155	79	604	10	1.65563	0.519204	3320|4927|6117|9631|10762|10808|23165|23511|23636|55706	HSP90AA1|NUP88|RPA1|NUP155|NUP50|HSPH1|NUP205|NUP188|NUP62|NDC1	-2.84026	0	11	0	0	-11.0685	12.1187
1	-4.52978	R-HSA-162587	M1	1	0	Reactome Gene Sets	6	HIV Life Cycle	-4.52978	3.68345	5.31484	24155	152	604	14	2.31788	0.612258	2237|2963|3159|3978|4927|5902|8815|9631|10762|11168|23165|23511|23636|55706	FEN1|GTF2F2|HMGA1|LIG1|NUP88|RANBP1|BANF1|NUP155|NUP50|PSIP1|NUP205|NUP188|NUP62|NDC1	-2.80553	0	11	0	0	-11.0685	12.1187
1	-4.42047	GO:0097064	M1	1	0	GO Biological Processes	19	ncRNA export from nucleus	-4.42047	7.3669	6.29023	24155	38	604	7	1.15894	0.435493	4927|9631|10762|23165|23511|23636|55706	NUP88|NUP155|NUP50|NUP205|NUP188|NUP62|NDC1	-2.7039	0	11	0	0	-11.0685	12.1187
1	-4.39289	R-HSA-5663205	M1	1	0	Reactome Gene Sets	6	Infectious disease	-4.39289	2.50601	4.75776	24155	383	604	24	3.97351	0.794812	805|1794|1839|2237|2963|3159|3320|3978|4927|5701|5708|5718|5902|6804|8815|9631|10197|10762|11168|23165|23511|23636|55706|116832	CALM2|DOCK2|HBEGF|FEN1|GTF2F2|HMGA1|HSP90AA1|LIG1|NUP88|PSMC2|PSMD2|PSMD12|RANBP1|STX1A|BANF1|NUP155|PSME3|NUP50|PSIP1|NUP205|NUP188|NUP62|NDC1|RPL39L	-2.67741	0	11	0	0	-11.0685	12.1187
1	-4.35049	GO:0034605	M1	1	0	GO Biological Processes	19	cellular response to heat	-4.35049	3.76734	5.22096	24155	138	604	13	2.15232	0.590487	3310|3320|4927|5743|6117|9631|10762|10808|23165|23511|23636|27429|55706	HSPA6|HSP90AA1|NUP88|PTGS2|RPA1|NUP155|NUP50|HSPH1|NUP205|NUP188|NUP62|HTRA2|NDC1	-2.6413	0	11	0	0	-11.0685	12.1187
1	-4.31893	R-HSA-191859	M1	1	0	Reactome Gene Sets	6	snRNP Assembly	-4.31893	6.03649	5.87824	24155	53	604	8	1.3245	0.465171	4927|6637|9631|10762|23165|23511|23636|55706	NUP88|SNRPG|NUP155|NUP50|NUP205|NUP188|NUP62|NDC1	-2.61311	0	11	0	0	-11.0685	12.1187
1	-4.31893	R-HSA-194441	M1	1	0	Reactome Gene Sets	6	Metabolism of non-coding RNA	-4.31893	6.03649	5.87824	24155	53	604	8	1.3245	0.465171	4927|6637|9631|10762|23165|23511|23636|55706	NUP88|SNRPG|NUP155|NUP50|NUP205|NUP188|NUP62|NDC1	-2.61311	0	11	0	0	-11.0685	12.1187
1	-4.2698	R-HSA-168276	M1	1	0	Reactome Gene Sets	6	NS1 Mediated Effects on Host Pathways	-4.2698	6.99855	6.08052	24155	40	604	7	1.15894	0.435493	4927|9631|10762|23165|23511|23636|55706	NUP88|NUP155|NUP50|NUP205|NUP188|NUP62|NDC1	-2.56926	0	11	0	0	-11.0685	12.1187
1	-4.14967	R-HSA-5578749	M1	1	0	Reactome Gene Sets	6	Transcriptional regulation by small RNAs	-4.14967	4.15008	5.20517	24155	106	604	11	1.82119	0.544087	3014|3015|4927|8364|9631|10762|23165|23511|23636|55706|94239	H2AX|H2AZ1|NUP88|H4C3|NUP155|NUP50|NUP205|NUP188|NUP62|NDC1|H2AZ2	-2.4666	0	11	0	0	-11.0685	12.1187
1	-4.1282	GO:0009124	M1	1	0	GO Biological Processes	19	nucleoside monophosphate biosynthetic process	-4.1282	3.07629	4.81617	24155	208	604	16	2.64901	0.653421	204|1633|3692|4927|5209|5315|7298|7371|9631|10762|23165|23511|23636|26289|55706|201163	AK2|DCK|EIF6|NUP88|PFKFB3|PKM|TYMS|UCK2|NUP155|NUP50|NUP205|NUP188|NUP62|AK5|NDC1|FLCN	-2.45042	0	11	0	0	-11.0685	12.1187
1	-4.12809	R-HSA-168253	M1	1	0	Reactome Gene Sets	6	Host Interactions with Influenza Factors	-4.12809	6.66529	5.88477	24155	42	604	7	1.15894	0.435493	4927|9631|10762|23165|23511|23636|55706	NUP88|NUP155|NUP50|NUP205|NUP188|NUP62|NDC1	-2.45042	0	11	0	0	-11.0685	12.1187
1	-4.10678	GO:0046031	M1	1	0	GO Biological Processes	19	ADP metabolic process	-4.10678	3.80874	5.06217	24155	126	604	12	1.98675	0.567801	204|3692|4927|5209|5315|9631|10762|23165|23511|23636|26289|55706	AK2|EIF6|NUP88|PFKFB3|PKM|NUP155|NUP50|NUP205|NUP188|NUP62|AK5|NDC1	-2.43269	0	11	0	0	-11.0685	12.1187
1	-4.03359	R-HSA-70326	M1	1	0	Reactome Gene Sets	6	Glucose metabolism	-4.03359	4.39469	5.19572	24155	91	604	10	1.65563	0.519204	4927|5209|5315|5515|9631|10762|23165|23511|23636|55706	NUP88|PFKFB3|PKM|PPP2CA|NUP155|NUP50|NUP205|NUP188|NUP62|NDC1	-2.36539	0	11	0	0	-11.0685	12.1187
1	-3.83765	GO:2001169	M1	1	0	GO Biological Processes	19	regulation of ATP biosynthetic process	-3.83765	4.1658	4.97725	24155	96	604	10	1.65563	0.519204	3692|4927|5209|9631|10762|23165|23511|23636|55706|201163	EIF6|NUP88|PFKFB3|NUP155|NUP50|NUP205|NUP188|NUP62|NDC1|FLCN	-2.19129	0	11	0	0	-11.0685	12.1187
1	-3.81216	GO:0009408	M1	1	0	GO Biological Processes	19	response to heat	-3.81216	3.16319	4.62575	24155	177	604	14	2.31788	0.612258	3310|3320|4927|5743|6117|9631|10762|10808|11168|23165|23511|23636|27429|55706	HSPA6|HSP90AA1|NUP88|PTGS2|RPA1|NUP155|NUP50|HSPH1|PSIP1|NUP205|NUP188|NUP62|HTRA2|NDC1	-2.17223	0	11	0	0	-11.0685	12.1187
1	-3.8074	R-HSA-4570464	M1	1	0	Reactome Gene Sets	6	SUMOylation of RNA binding proteins	-3.8074	5.95621	5.44662	24155	47	604	7	1.15894	0.435493	4927|9631|10762|23165|23511|23636|55706	NUP88|NUP155|NUP50|NUP205|NUP188|NUP62|NDC1	-2.1719	0	11	0	0	-11.0685	12.1187
1	-3.8064	GO:0006110	M1	1	0	GO Biological Processes	19	regulation of glycolytic process	-3.8064	4.55602	5.06983	24155	79	604	9	1.49007	0.492974	3692|4927|5209|9631|10762|23165|23511|23636|55706	EIF6|NUP88|PFKFB3|NUP155|NUP50|NUP205|NUP188|NUP62|NDC1	-2.1719	0	11	0	0	-11.0685	12.1187
1	-3.80539	GO:0060968	M1	1	0	GO Biological Processes	19	regulation of gene silencing	-3.80539	3.33264	4.68083	24155	156	604	13	2.15232	0.590487	1786|1956|3159|4927|8318|8364|9555|9631|10762|23165|23511|23636|55706	DNMT1|EGFR|HMGA1|NUP88|CDC45|H4C3|MACROH2A1|NUP155|NUP50|NUP205|NUP188|NUP62|NDC1	-2.1718	0	11	0	0	-11.0685	12.1187
1	-3.78889	R-HSA-211000	M1	1	0	Reactome Gene Sets	6	Gene Silencing by RNA	-3.78889	3.52868	4.73581	24155	136	604	12	1.98675	0.567801	3014|3015|3320|4927|8364|9631|10762|23165|23511|23636|55706|94239	H2AX|H2AZ1|HSP90AA1|NUP88|H4C3|NUP155|NUP50|NUP205|NUP188|NUP62|NDC1|H2AZ2	-2.15619	0	11	0	0	-11.0685	12.1187
1	-3.72913	GO:0009135	M1	1	0	GO Biological Processes	19	purine nucleoside diphosphate metabolic process	-3.72913	3.47754	4.67422	24155	138	604	12	1.98675	0.567801	204|3692|4927|5209|5315|9631|10762|23165|23511|23636|26289|55706	AK2|EIF6|NUP88|PFKFB3|PKM|NUP155|NUP50|NUP205|NUP188|NUP62|AK5|NDC1	-2.10619	0	11	0	0	-11.0685	12.1187
1	-3.72913	GO:0009179	M1	1	0	GO Biological Processes	19	purine ribonucleoside diphosphate metabolic process	-3.72913	3.47754	4.67422	24155	138	604	12	1.98675	0.567801	204|3692|4927|5209|5315|9631|10762|23165|23511|23636|26289|55706	AK2|EIF6|NUP88|PFKFB3|PKM|NUP155|NUP50|NUP205|NUP188|NUP62|AK5|NDC1	-2.10619	0	11	0	0	-11.0685	12.1187
1	-3.72258	GO:0030811	M1	1	0	GO Biological Processes	19	regulation of nucleotide catabolic process	-3.72258	4.44352	4.97141	24155	81	604	9	1.49007	0.492974	3692|4927|5209|9631|10762|23165|23511|23636|55706	EIF6|NUP88|PFKFB3|NUP155|NUP50|NUP205|NUP188|NUP62|NDC1	-2.1014	0	11	0	0	-11.0685	12.1187
1	-3.69731	GO:0051193	M1	1	0	GO Biological Processes	19	regulation of cofactor metabolic process	-3.69731	3.69671	4.72265	24155	119	604	11	1.82119	0.544087	3692|4314|4927|5209|5880|9631|10762|23165|23511|23636|55706	EIF6|MMP3|NUP88|PFKFB3|RAC2|NUP155|NUP50|NUP205|NUP188|NUP62|NDC1	-2.07874	0	11	0	0	-11.0685	12.1187
1	-3.68167	GO:0016925	M1	1	0	GO Biological Processes	19	protein sumoylation	-3.68167	4.38934	4.9234	24155	82	604	9	1.49007	0.492974	4927|6804|9063|9631|10762|23165|23511|23636|55706	NUP88|STX1A|PIAS2|NUP155|NUP50|NUP205|NUP188|NUP62|NDC1	-2.06484	0	11	0	0	-11.0685	12.1187
1	-3.67056	GO:0009185	M1	1	0	GO Biological Processes	19	ribonucleoside diphosphate metabolic process	-3.67056	3.42786	4.61376	24155	140	604	12	1.98675	0.567801	204|3692|4927|5209|5315|9631|10762|23165|23511|23636|26289|55706	AK2|EIF6|NUP88|PFKFB3|PKM|NUP155|NUP50|NUP205|NUP188|NUP62|AK5|NDC1	-2.05502	0	11	0	0	-11.0685	12.1187
1	-3.61649	GO:0051170	M1	1	0	GO Biological Processes	19	import into nucleus	-3.61649	3.18952	4.49178	24155	163	604	13	2.15232	0.590487	1434|3178|4000|4927|5569|5743|6637|9631|10762|23511|23636|29107|55612	CSE1L|HNRNPA1|LMNA|NUP88|PKIA|PTGS2|SNRPG|NUP155|NUP50|NUP188|NUP62|NXT1|FERMT1	-2.00992	0	11	0	0	-11.0685	12.1187
1	-3.60229	GO:1903578	M1	1	0	GO Biological Processes	19	regulation of ATP metabolic process	-3.60229	3.60581	4.62091	24155	122	604	11	1.82119	0.544087	891|3692|4927|5209|9631|10762|23165|23511|23636|55706|201163	CCNB1|EIF6|NUP88|PFKFB3|NUP155|NUP50|NUP205|NUP188|NUP62|NDC1|FLCN	-1.99991	0	11	0	0	-11.0685	12.1187
1	-3.54029	GO:0009142	M1	1	0	GO Biological Processes	19	nucleoside triphosphate biosynthetic process	-3.54029	2.97811	4.36044	24155	188	604	14	2.31788	0.612258	3692|4927|5209|5315|7298|7371|9631|10762|23165|23511|23636|26289|55706|201163	EIF6|NUP88|PFKFB3|PKM|TYMS|UCK2|NUP155|NUP50|NUP205|NUP188|NUP62|AK5|NDC1|FLCN	-1.94694	0	11	0	0	-11.0685	12.1187
1	-3.44915	GO:0043470	M1	1	0	GO Biological Processes	19	regulation of carbohydrate catabolic process	-3.44915	4.09006	4.65057	24155	88	604	9	1.49007	0.492974	3692|4927|5209|9631|10762|23165|23511|23636|55706	EIF6|NUP88|PFKFB3|NUP155|NUP50|NUP205|NUP188|NUP62|NDC1	-1.87434	0	11	0	0	-11.0685	12.1187
1	-3.33451	GO:0009156	M1	1	0	GO Biological Processes	19	ribonucleoside monophosphate biosynthetic process	-3.33451	2.84205	4.15736	24155	197	604	14	2.31788	0.612258	204|3692|4927|5209|5315|7371|9631|10762|23165|23511|23636|26289|55706|201163	AK2|EIF6|NUP88|PFKFB3|PKM|UCK2|NUP155|NUP50|NUP205|NUP188|NUP62|AK5|NDC1|FLCN	-1.77285	0	11	0	0	-11.0685	12.1187
1	-3.27725	GO:0075733	M1	1	0	GO Biological Processes	19	intracellular transport of virus	-3.27725	4.91126	4.73448	24155	57	604	7	1.15894	0.435493	4927|9631|10762|23165|23511|23636|55706	NUP88|NUP155|NUP50|NUP205|NUP188|NUP62|NDC1	-1.72835	0	11	0	0	-11.0685	12.1187
1	-3.27725	R-HSA-6784531	M1	1	0	Reactome Gene Sets	6	tRNA processing in the nucleus	-3.27725	4.91126	4.73448	24155	57	604	7	1.15894	0.435493	4927|9631|10762|23165|23511|23636|55706	NUP88|NUP155|NUP50|NUP205|NUP188|NUP62|NDC1	-1.72835	0	11	0	0	-11.0685	12.1187
1	-3.25201	GO:0006165	M1	1	0	GO Biological Processes	19	nucleoside diphosphate phosphorylation	-3.25201	3.2829	4.24378	24155	134	604	11	1.82119	0.544087	3692|4927|5209|5315|9631|10762|23165|23511|23636|26289|55706	EIF6|NUP88|PFKFB3|PKM|NUP155|NUP50|NUP205|NUP188|NUP62|AK5|NDC1	-1.70679	0	11	0	0	-11.0685	12.1187
1	-3.2189	GO:0034404	M1	1	0	GO Biological Processes	19	nucleobase-containing small molecule biosynthetic process	-3.2189	2.65432	4.00147	24155	226	604	15	2.48344	0.63321	1633|3692|4860|4907|4927|5209|5315|7371|9631|10762|23165|23511|23636|55706|252969	DCK|EIF6|PNP|NT5E|NUP88|PFKFB3|PKM|UCK2|NUP155|NUP50|NUP205|NUP188|NUP62|NDC1|NEIL2	-1.67879	0	11	0	0	-11.0685	12.1187
1	-3.20291	GO:0051196	M1	1	0	GO Biological Processes	19	regulation of coenzyme metabolic process	-3.20291	3.78869	4.36137	24155	95	604	9	1.49007	0.492974	3692|4927|5209|9631|10762|23165|23511|23636|55706	EIF6|NUP88|PFKFB3|NUP155|NUP50|NUP205|NUP188|NUP62|NDC1	-1.66377	0	11	0	0	-11.0685	12.1187
1	-3.20086	GO:0006096	M1	1	0	GO Biological Processes	19	glycolytic process	-3.20086	3.47754	4.26492	24155	115	604	10	1.65563	0.519204	3692|4927|5209|5315|9631|10762|23165|23511|23636|55706	EIF6|NUP88|PFKFB3|PKM|NUP155|NUP50|NUP205|NUP188|NUP62|NDC1	-1.66363	0	11	0	0	-11.0685	12.1187
1	-3.19785	GO:0046939	M1	1	0	GO Biological Processes	19	nucleotide phosphorylation	-3.19785	3.23462	4.18509	24155	136	604	11	1.82119	0.544087	3692|4927|5209|5315|9631|10762|23165|23511|23636|26289|55706	EIF6|NUP88|PFKFB3|PKM|NUP155|NUP50|NUP205|NUP188|NUP62|AK5|NDC1	-1.66135	0	11	0	0	-11.0685	12.1187
1	-3.19129	GO:0009132	M1	1	0	GO Biological Processes	19	nucleoside diphosphate metabolic process	-3.19129	3.03735	4.11456	24155	158	604	12	1.98675	0.567801	204|3692|4927|5209|5315|9631|10762|23165|23511|23636|26289|55706	AK2|EIF6|NUP88|PFKFB3|PKM|NUP155|NUP50|NUP205|NUP188|NUP62|AK5|NDC1	-1.6555	0	11	0	0	-11.0685	12.1187
1	-3.17133	GO:0006757	M1	1	0	GO Biological Processes	19	ATP generation from ADP	-3.17133	3.44756	4.23168	24155	116	604	10	1.65563	0.519204	3692|4927|5209|5315|9631|10762|23165|23511|23636|55706	EIF6|NUP88|PFKFB3|PKM|NUP155|NUP50|NUP205|NUP188|NUP62|NDC1	-1.64033	0	11	0	0	-11.0685	12.1187
1	-3.14215	GO:1900371	M1	1	0	GO Biological Processes	19	regulation of purine nucleotide biosynthetic process	-3.14215	3.4181	4.1988	24155	117	604	10	1.65563	0.519204	3692|4927|5209|9631|10762|23165|23511|23636|55706|201163	EIF6|NUP88|PFKFB3|NUP155|NUP50|NUP205|NUP188|NUP62|NDC1|FLCN	-1.617	0	11	0	0	-11.0685	12.1187
1	-3.14065	GO:0046794	M1	1	0	GO Biological Processes	19	transport of virus	-3.14065	4.6657	4.55279	24155	60	604	7	1.15894	0.435493	4927|9631|10762|23165|23511|23636|55706	NUP88|NUP155|NUP50|NUP205|NUP188|NUP62|NDC1	-1.6169	0	11	0	0	-11.0685	12.1187
1	-3.13525	GO:0009127	M1	1	0	GO Biological Processes	19	purine nucleoside monophosphate biosynthetic process	-3.13525	2.84094	4.00333	24155	183	604	13	2.15232	0.590487	204|3692|4927|5209|5315|9631|10762|23165|23511|23636|26289|55706|201163	AK2|EIF6|NUP88|PFKFB3|PKM|NUP155|NUP50|NUP205|NUP188|NUP62|AK5|NDC1|FLCN	-1.61428	0	11	0	0	-11.0685	12.1187
1	-3.13525	GO:0009166	M1	1	0	GO Biological Processes	19	nucleotide catabolic process	-3.13525	2.84094	4.00333	24155	183	604	13	2.15232	0.590487	3692|4860|4907|4927|5209|5315|9631|10762|23165|23511|23636|55706|252969	EIF6|PNP|NT5E|NUP88|PFKFB3|PKM|NUP155|NUP50|NUP205|NUP188|NUP62|NDC1|NEIL2	-1.61428	0	11	0	0	-11.0685	12.1187
1	-3.13525	GO:0009168	M1	1	0	GO Biological Processes	19	purine ribonucleoside monophosphate biosynthetic process	-3.13525	2.84094	4.00333	24155	183	604	13	2.15232	0.590487	204|3692|4927|5209|5315|9631|10762|23165|23511|23636|26289|55706|201163	AK2|EIF6|NUP88|PFKFB3|PKM|NUP155|NUP50|NUP205|NUP188|NUP62|AK5|NDC1|FLCN	-1.61428	0	11	0	0	-11.0685	12.1187
1	-3.11331	GO:0030808	M1	1	0	GO Biological Processes	19	regulation of nucleotide biosynthetic process	-3.11331	3.38913	4.16628	24155	118	604	10	1.65563	0.519204	3692|4927|5209|9631|10762|23165|23511|23636|55706|201163	EIF6|NUP88|PFKFB3|NUP155|NUP50|NUP205|NUP188|NUP62|NDC1|FLCN	-1.59373	0	11	0	0	-11.0685	12.1187
1	-3.10176	GO:0009165	M1	1	0	GO Biological Processes	19	nucleotide biosynthetic process	-3.10176	2.17572	3.72905	24155	386	604	21	3.47682	0.745399	204|1633|3692|4860|4927|5209|5315|5743|6240|6241|7298|7371|9631|10762|23165|23511|23636|26289|54898|55706|201163	AK2|DCK|EIF6|PNP|NUP88|PFKFB3|PKM|PTGS2|RRM1|RRM2|TYMS|UCK2|NUP155|NUP50|NUP205|NUP188|NUP62|AK5|ELOVL2|NDC1|FLCN	-1.58655	0	11	0	0	-11.0685	12.1187
1	-3.08481	GO:0042866	M1	1	0	GO Biological Processes	19	pyruvate biosynthetic process	-3.08481	3.36065	4.13411	24155	119	604	10	1.65563	0.519204	3692|4927|5209|5315|9631|10762|23165|23511|23636|55706	EIF6|NUP88|PFKFB3|PKM|NUP155|NUP50|NUP205|NUP188|NUP62|NDC1	-1.57683	0	11	0	0	-11.0685	12.1187
1	-3.06022	R-HSA-1169410	M1	1	0	Reactome Gene Sets	6	Antiviral mechanism by IFN-stimulated genes	-3.06022	3.99917	4.303	24155	80	604	8	1.3245	0.465171	4927|4940|9631|10762|23165|23511|23636|55706	NUP88|OAS3|NUP155|NUP50|NUP205|NUP188|NUP62|NDC1	-1.55626	0	11	0	0	-11.0685	12.1187
1	-3.04521	GO:1901293	M1	1	0	GO Biological Processes	19	nucleoside phosphate biosynthetic process	-3.04521	2.1534	3.67749	24155	390	604	21	3.47682	0.745399	204|1633|3692|4860|4927|5209|5315|5743|6240|6241|7298|7371|9631|10762|23165|23511|23636|26289|54898|55706|201163	AK2|DCK|EIF6|PNP|NUP88|PFKFB3|PKM|PTGS2|RRM1|RRM2|TYMS|UCK2|NUP155|NUP50|NUP205|NUP188|NUP62|AK5|ELOVL2|NDC1|FLCN	-1.54325	0	11	0	0	-11.0685	12.1187
1	-3.0419	GO:1900542	M1	1	0	GO Biological Processes	19	regulation of purine nucleotide metabolic process	-3.0419	3.09795	4.01536	24155	142	604	11	1.82119	0.544087	891|3692|4927|5209|9631|10762|23165|23511|23636|55706|201163	CCNB1|EIF6|NUP88|PFKFB3|NUP155|NUP50|NUP205|NUP188|NUP62|NDC1|FLCN	-1.5406	0	11	0	0	-11.0685	12.1187
1	-3.01681	GO:0006606	M1	1	0	GO Biological Processes	19	protein import into nucleus	-3.01681	3.07629	3.98795	24155	143	604	11	1.82119	0.544087	1434|4000|4927|5569|5743|9631|10762|23511|23636|29107|55612	CSE1L|LMNA|NUP88|PKIA|PTGS2|NUP155|NUP50|NUP188|NUP62|NXT1|FERMT1	-1.51881	0	11	0	0	-11.0685	12.1187
1	-3.00565	GO:1901292	M1	1	0	GO Biological Processes	19	nucleoside phosphate catabolic process	-3.00565	2.75075	3.8696	24155	189	604	13	2.15232	0.590487	3692|4860|4907|4927|5209|5315|9631|10762|23165|23511|23636|55706|252969	EIF6|PNP|NT5E|NUP88|PFKFB3|PKM|NUP155|NUP50|NUP205|NUP188|NUP62|NDC1|NEIL2	-1.50897	0	11	0	0	-11.0685	12.1187
1	-2.94304	GO:0006140	M1	1	0	GO Biological Processes	19	regulation of nucleotide metabolic process	-2.94304	3.01307	3.90713	24155	146	604	11	1.82119	0.544087	891|3692|4927|5209|9631|10762|23165|23511|23636|55706|201163	CCNB1|EIF6|NUP88|PFKFB3|NUP155|NUP50|NUP205|NUP188|NUP62|NDC1|FLCN	-1.45864	0	11	0	0	-11.0685	12.1187
1	-2.91893	GO:0019359	M1	1	0	GO Biological Processes	19	nicotinamide nucleotide biosynthetic process	-2.91893	2.99258	3.88065	24155	147	604	11	1.82119	0.544087	3692|4927|5209|5315|5743|9631|10762|23165|23511|23636|55706	EIF6|NUP88|PFKFB3|PKM|PTGS2|NUP155|NUP50|NUP205|NUP188|NUP62|NDC1	-1.44086	0	11	0	0	-11.0685	12.1187
1	-2.91893	GO:0019363	M1	1	0	GO Biological Processes	19	pyridine nucleotide biosynthetic process	-2.91893	2.99258	3.88065	24155	147	604	11	1.82119	0.544087	3692|4927|5209|5315|5743|9631|10762|23165|23511|23636|55706	EIF6|NUP88|PFKFB3|PKM|PTGS2|NUP155|NUP50|NUP205|NUP188|NUP62|NDC1	-1.44086	0	11	0	0	-11.0685	12.1187
1	-2.88156	GO:0009266	M1	1	0	GO Biological Processes	19	response to temperature stimulus	-2.88156	2.45851	3.66702	24155	244	604	15	2.48344	0.63321	3310|3320|4927|5743|6117|9631|10762|10808|11168|23165|23511|23636|27429|55706|56925	HSPA6|HSP90AA1|NUP88|PTGS2|RPA1|NUP155|NUP50|HSPH1|PSIP1|NUP205|NUP188|NUP62|HTRA2|NDC1|LXN	-1.41097	0	11	0	0	-11.0685	12.1187
1	-2.86203	GO:0072524	M1	1	0	GO Biological Processes	19	pyridine-containing compound metabolic process	-2.86203	2.65251	3.72003	24155	196	604	13	2.15232	0.590487	3692|4860|4907|4927|5209|5315|5743|9631|10762|23165|23511|23636|55706	EIF6|PNP|NT5E|NUP88|PFKFB3|PKM|PTGS2|NUP155|NUP50|NUP205|NUP188|NUP62|NDC1	-1.39634	0	11	0	0	-11.0685	12.1187
1	-2.84799	GO:0072525	M1	1	0	GO Biological Processes	19	pyridine-containing compound biosynthetic process	-2.84799	2.93273	3.80254	24155	150	604	11	1.82119	0.544087	3692|4927|5209|5315|5743|9631|10762|23165|23511|23636|55706	EIF6|NUP88|PFKFB3|PKM|PTGS2|NUP155|NUP50|NUP205|NUP188|NUP62|NDC1	-1.38476	0	11	0	0	-11.0685	12.1187
1	-2.83276	R-HSA-72306	M1	1	0	Reactome Gene Sets	6	tRNA processing	-2.83276	3.36379	3.92437	24155	107	604	9	1.49007	0.492974	4927|9631|10762|23165|23511|23636|54888|55706|57570	NUP88|NUP155|NUP50|NUP205|NUP188|NUP62|NSUN2|NDC1|TRMT5	-1.37255	0	11	0	0	-11.0685	12.1187
1	-2.76639	GO:0019058	M1	1	0	GO Biological Processes	19	viral life cycle	-2.76639	2.188	3.47453	24155	329	604	18	2.98013	0.691878	1956|3609|3673|4927|4940|5817|5818|5886|8091|8815|9126|9631|10762|23165|23511|23636|55706|64710	EGFR|ILF3|ITGA2|NUP88|OAS3|PVR|NECTIN1|RAD23A|HMGA2|BANF1|SMC3|NUP155|NUP50|NUP205|NUP188|NUP62|NDC1|NUCKS1	-1.31808	0	11	0	0	-11.0685	12.1187
1	-2.76389	GO:0009201	M1	1	0	GO Biological Processes	19	ribonucleoside triphosphate biosynthetic process	-2.76389	2.7113	3.65945	24155	177	604	12	1.98675	0.567801	3692|4927|5209|5315|7371|9631|10762|23165|23511|23636|55706|201163	EIF6|NUP88|PFKFB3|PKM|UCK2|NUP155|NUP50|NUP205|NUP188|NUP62|NDC1|FLCN	-1.31617	0	11	0	0	-11.0685	12.1187
1	-2.69383	R-HSA-168273	M1	1	0	Reactome Gene Sets	6	Influenza Viral RNA Transcription and Replication	-2.69383	2.98446	3.68898	24155	134	604	10	1.65563	0.519204	2963|3320|4927|9631|10762|23165|23511|23636|55706|116832	GTF2F2|HSP90AA1|NUP88|NUP155|NUP50|NUP205|NUP188|NUP62|NDC1|RPL39L	-1.25824	0	11	0	0	-11.0685	12.1187
1	-2.67079	R-HSA-1169408	M1	1	0	Reactome Gene Sets	6	ISG15 antiviral mechanism	-2.67079	3.88808	3.93033	24155	72	604	7	1.15894	0.435493	4927|9631|10762|23165|23511|23636|55706	NUP88|NUP155|NUP50|NUP205|NUP188|NUP62|NDC1	-1.23918	0	11	0	0	-11.0685	12.1187
1	-2.66854	GO:0043467	M1	1	0	GO Biological Processes	19	regulation of generation of precursor metabolites and energy	-2.66854	2.78423	3.60338	24155	158	604	11	1.82119	0.544087	891|3692|4927|5209|9631|10762|23165|23511|23636|55706|201163	CCNB1|EIF6|NUP88|PFKFB3|NUP155|NUP50|NUP205|NUP188|NUP62|NDC1|FLCN	-1.23899	0	11	0	0	-11.0685	12.1187
1	-2.66835	GO:0060964	M1	1	0	GO Biological Processes	19	regulation of gene silencing by miRNA	-2.66835	3.18518	3.72863	24155	113	604	9	1.49007	0.492974	1956|4927|8364|9631|10762|23165|23511|23636|55706	EGFR|NUP88|H4C3|NUP155|NUP50|NUP205|NUP188|NUP62|NDC1	-1.23899	0	11	0	0	-11.0685	12.1187
1	-2.63629	GO:0044766	M1	1	0	GO Biological Processes	19	multi-organism transport	-2.63629	3.83482	3.88463	24155	73	604	7	1.15894	0.435493	4927|9631|10762|23165|23511|23636|55706	NUP88|NUP155|NUP50|NUP205|NUP188|NUP62|NDC1	-1.21911	0	11	0	0	-11.0685	12.1187
1	-2.63629	GO:1902579	M1	1	0	GO Biological Processes	19	multi-organism localization	-2.63629	3.83482	3.88463	24155	73	604	7	1.15894	0.435493	4927|9631|10762|23165|23511|23636|55706	NUP88|NUP155|NUP50|NUP205|NUP188|NUP62|NDC1	-1.21911	0	11	0	0	-11.0685	12.1187
1	-2.62575	GO:0006754	M1	1	0	GO Biological Processes	19	ATP biosynthetic process	-2.62575	2.74943	3.55553	24155	160	604	11	1.82119	0.544087	3692|4927|5209|5315|9631|10762|23165|23511|23636|55706|201163	EIF6|NUP88|PFKFB3|PKM|NUP155|NUP50|NUP205|NUP188|NUP62|NDC1|FLCN	-1.21184	0	11	0	0	-11.0685	12.1187
1	-2.61084	GO:0072522	M1	1	0	GO Biological Processes	19	purine-containing compound biosynthetic process	-2.61084	2.17207	3.34245	24155	313	604	17	2.81457	0.672958	204|1633|3692|4860|4907|4927|5209|5315|9631|10762|23165|23511|23636|26289|54898|55706|201163	AK2|DCK|EIF6|PNP|NT5E|NUP88|PFKFB3|PKM|NUP155|NUP50|NUP205|NUP188|NUP62|AK5|ELOVL2|NDC1|FLCN	-1.20071	0	11	0	0	-11.0685	12.1187
1	-2.56537	GO:0060147	M1	1	0	GO Biological Processes	19	regulation of posttranscriptional gene silencing	-2.56537	3.07629	3.60528	24155	117	604	9	1.49007	0.492974	1956|4927|8364|9631|10762|23165|23511|23636|55706	EGFR|NUP88|H4C3|NUP155|NUP50|NUP205|NUP188|NUP62|NDC1	-1.16058	0	11	0	0	-11.0685	12.1187
1	-2.56537	GO:0060966	M1	1	0	GO Biological Processes	19	regulation of gene silencing by RNA	-2.56537	3.07629	3.60528	24155	117	604	9	1.49007	0.492974	1956|4927|8364|9631|10762|23165|23511|23636|55706	EGFR|NUP88|H4C3|NUP155|NUP50|NUP205|NUP188|NUP62|NDC1	-1.16058	0	11	0	0	-11.0685	12.1187
1	-2.52766	GO:0019362	M1	1	0	GO Biological Processes	19	pyridine nucleotide metabolic process	-2.52766	2.53916	3.40192	24155	189	604	12	1.98675	0.567801	3692|4907|4927|5209|5315|5743|9631|10762|23165|23511|23636|55706	EIF6|NT5E|NUP88|PFKFB3|PKM|PTGS2|NUP155|NUP50|NUP205|NUP188|NUP62|NDC1	-1.13439	0	11	0	0	-11.0685	12.1187
1	-2.52766	GO:0046496	M1	1	0	GO Biological Processes	19	nicotinamide nucleotide metabolic process	-2.52766	2.53916	3.40192	24155	189	604	12	1.98675	0.567801	3692|4907|4927|5209|5315|5743|9631|10762|23165|23511|23636|55706	EIF6|NT5E|NUP88|PFKFB3|PKM|PTGS2|NUP155|NUP50|NUP205|NUP188|NUP62|NDC1	-1.13439	0	11	0	0	-11.0685	12.1187
1	-2.5015	GO:0009123	M1	1	0	GO Biological Processes	19	nucleoside monophosphate metabolic process	-2.5015	2.02086	3.195	24155	376	604	19	3.1457	0.710231	204|891|1633|3692|4907|4927|5209|5315|7298|7371|9631|10762|23165|23511|23636|26289|55706|56975|201163	AK2|CCNB1|DCK|EIF6|NT5E|NUP88|PFKFB3|PKM|TYMS|UCK2|NUP155|NUP50|NUP205|NUP188|NUP62|AK5|NDC1|FAM20C|FLCN	-1.11287	0	11	0	0	-11.0685	12.1187
1	-2.48372	R-HSA-71387	M1	1	0	Reactome Gene Sets	6	Metabolism of carbohydrates	-2.48372	2.16904	3.2353	24155	295	604	16	2.64901	0.653421	231|805|960|2131|4927|5209|5315|5515|6382|9631|9955|10762|23165|23511|23636|55706	AKR1B1|CALM2|CD44|EXT1|NUP88|PFKFB3|PKM|PPP2CA|SDC1|NUP155|HS3ST3A1|NUP50|NUP205|NUP188|NUP62|NDC1	-1.09865	0	11	0	0	-11.0685	12.1187
1	-2.4663	R-HSA-168255	M1	1	0	Reactome Gene Sets	6	Influenza Life Cycle	-2.4663	2.7772	3.42548	24155	144	604	10	1.65563	0.519204	2963|3320|4927|9631|10762|23165|23511|23636|55706|116832	GTF2F2|HSP90AA1|NUP88|NUP155|NUP50|NUP205|NUP188|NUP62|NDC1|RPL39L	-1.08578	0	11	0	0	-11.0685	12.1187
1	-2.40397	GO:0009206	M1	1	0	GO Biological Processes	19	purine ribonucleoside triphosphate biosynthetic process	-2.40397	2.57257	3.30487	24155	171	604	11	1.82119	0.544087	3692|4927|5209|5315|9631|10762|23165|23511|23636|55706|201163	EIF6|NUP88|PFKFB3|PKM|NUP155|NUP50|NUP205|NUP188|NUP62|NDC1|FLCN	-1.03922	0	11	0	0	-11.0685	12.1187
1	-2.38488	GO:0009145	M1	1	0	GO Biological Processes	19	purine nucleoside triphosphate biosynthetic process	-2.38488	2.55761	3.28307	24155	172	604	11	1.82119	0.544087	3692|4927|5209|5315|9631|10762|23165|23511|23636|55706|201163	EIF6|NUP88|PFKFB3|PKM|NUP155|NUP50|NUP205|NUP188|NUP62|NDC1|FLCN	-1.02313	0	11	0	0	-11.0685	12.1187
1	-2.37623	GO:0046434	M1	1	0	GO Biological Processes	19	organophosphate catabolic process	-2.37623	2.24853	3.17142	24155	249	604	14	2.31788	0.612258	3692|4860|4907|4927|5209|5315|8871|9631|10762|23165|23511|23636|55706|252969	EIF6|PNP|NT5E|NUP88|PFKFB3|PKM|SYNJ2|NUP155|NUP50|NUP205|NUP188|NUP62|NDC1|NEIL2	-1.01773	0	11	0	0	-11.0685	12.1187
1	-2.34777	GO:0016052	M1	1	0	GO Biological Processes	19	carbohydrate catabolic process	-2.34777	2.41156	3.20204	24155	199	604	12	1.98675	0.567801	3692|4927|5209|5315|9631|10762|23165|23511|23636|55556|55706|130589	EIF6|NUP88|PFKFB3|PKM|NUP155|NUP50|NUP205|NUP188|NUP62|ENOSF1|NDC1|GALM	-0.997779	0	11	0	0	-11.0685	12.1187
1	-2.34777	GO:0017038	M1	1	0	GO Biological Processes	19	protein import	-2.34777	2.41156	3.20204	24155	199	604	12	1.98675	0.567801	1434|3320|4000|4927|5569|5743|9631|10762|23511|23636|29107|55612	CSE1L|HSP90AA1|LMNA|NUP88|PKIA|PTGS2|NUP155|NUP50|NUP188|NUP62|NXT1|FERMT1	-0.997779	0	11	0	0	-11.0685	12.1187
1	-2.3268	GO:0009141	M1	1	0	GO Biological Processes	19	nucleoside triphosphate metabolic process	-2.3268	1.98854	3.03481	24155	362	604	18	2.98013	0.691878	204|891|3692|4927|5209|5315|7298|7371|9631|10762|23165|23511|23636|26289|55706|56975|79631|201163	AK2|CCNB1|EIF6|NUP88|PFKFB3|PKM|TYMS|UCK2|NUP155|NUP50|NUP205|NUP188|NUP62|AK5|NDC1|FAM20C|EFL1|FLCN	-0.979611	0	11	0	0	-11.0685	12.1187
1	-2.31019	R-HSA-5619115	M1	1	0	Reactome Gene Sets	6	Disorders of transmembrane transporters	-2.31019	2.49948	3.19735	24155	176	604	11	1.82119	0.544087	4927|5701|5708|5718|9631|10197|10762|23165|23511|23636|55706	NUP88|PSMC2|PSMD2|PSMD12|NUP155|PSME3|NUP50|NUP205|NUP188|NUP62|NDC1	-0.967622	0	11	0	0	-11.0685	12.1187
1	-2.26091	GO:0006090	M1	1	0	GO Biological Processes	19	pyruvate metabolic process	-2.26091	2.59687	3.18363	24155	154	604	10	1.65563	0.519204	3692|4927|5209|5315|9631|10762|23165|23511|23636|55706	EIF6|NUP88|PFKFB3|PKM|NUP155|NUP50|NUP205|NUP188|NUP62|NDC1	-0.927	0	11	0	0	-11.0685	12.1187
1	-2.24148	R-HSA-168254	M1	1	0	Reactome Gene Sets	6	Influenza Infection	-2.24148	2.58011	3.1605	24155	155	604	10	1.65563	0.519204	2963|3320|4927|9631|10762|23165|23511|23636|55706|116832	GTF2F2|HSP90AA1|NUP88|NUP155|NUP50|NUP205|NUP188|NUP62|NDC1|RPL39L	-0.916489	0	11	0	0	-11.0685	12.1187
1	-2.24037	GO:0090407	M1	1	0	GO Biological Processes	19	organophosphate biosynthetic process	-2.24037	1.65917	2.83216	24155	699	604	29	4.80132	0.869916	204|1633|2247|3692|4860|4927|5209|5315|5467|5743|6240|6241|7298|7371|8821|8871|9631|10762|23165|23511|23636|26289|54898|54947|55300|55361|55706|201163|284098	AK2|DCK|FGF2|EIF6|PNP|NUP88|PFKFB3|PKM|PPARD|PTGS2|RRM1|RRM2|TYMS|UCK2|INPP4B|SYNJ2|NUP155|NUP50|NUP205|NUP188|NUP62|AK5|ELOVL2|LPCAT2|PI4K2B|PI4K2A|NDC1|FLCN|PIGW	-0.915819	0	11	0	0	-11.0685	12.1187
1	-2.23841	GO:0009199	M1	1	0	GO Biological Processes	19	ribonucleoside triphosphate metabolic process	-2.23841	1.99372	2.95961	24155	341	604	17	2.81457	0.672958	204|891|3692|4927|5209|5315|7371|9631|10762|23165|23511|23636|26289|55706|56975|79631|201163	AK2|CCNB1|EIF6|NUP88|PFKFB3|PKM|UCK2|NUP155|NUP50|NUP205|NUP188|NUP62|AK5|NDC1|FAM20C|EFL1|FLCN	-0.915002	0	11	0	0	-11.0685	12.1187
1	-2.21382	GO:0006733	M1	1	0	GO Biological Processes	19	oxidoreduction coenzyme metabolic process	-2.21382	2.31836	3.05066	24155	207	604	12	1.98675	0.567801	3692|4907|4927|5209|5315|5743|9631|10762|23165|23511|23636|55706	EIF6|NT5E|NUP88|PFKFB3|PKM|PTGS2|NUP155|NUP50|NUP205|NUP188|NUP62|NDC1	-0.89367	0	11	0	0	-11.0685	12.1187
1	-2.18537	GO:0034504	M1	1	0	GO Biological Processes	19	protein localization to nucleus	-2.18537	2.13696	2.96326	24155	262	604	14	2.31788	0.612258	1434|3976|4000|4927|5569|5743|9631|10762|23511|23636|29107|51512|55612|201163	CSE1L|LIF|LMNA|NUP88|PKIA|PTGS2|NUP155|NUP50|NUP188|NUP62|NXT1|GTSE1|FERMT1|FLCN	-0.874002	0	11	0	0	-11.0685	12.1187
1	-2.13752	GO:0009260	M1	1	0	GO Biological Processes	19	ribonucleotide biosynthetic process	-2.13752	2.04736	2.88858	24155	293	604	15	2.48344	0.63321	204|3692|4927|5209|5315|7371|9631|10762|23165|23511|23636|26289|54898|55706|201163	AK2|EIF6|NUP88|PFKFB3|PKM|UCK2|NUP155|NUP50|NUP205|NUP188|NUP62|AK5|ELOVL2|NDC1|FLCN	-0.840344	0	11	0	0	-11.0685	12.1187
1	-2.12815	GO:1901137	M1	1	0	GO Biological Processes	19	carbohydrate derivative biosynthetic process	-2.12815	1.59761	2.70983	24155	776	604	31	5.13245	0.897848	204|1633|1839|2131|3692|4907|4927|5209|5315|6240|6241|6382|7298|7358|7371|9631|9955|10762|11227|22822|23165|23511|23636|26289|54898|55706|56913|79695|124583|201163|284098	AK2|DCK|HBEGF|EXT1|EIF6|NT5E|NUP88|PFKFB3|PKM|RRM1|RRM2|SDC1|TYMS|UGDH|UCK2|NUP155|HS3ST3A1|NUP50|GALNT5|PHLDA1|NUP205|NUP188|NUP62|AK5|ELOVL2|NDC1|C1GALT1|GALNT12|CANT1|FLCN|PIGW	-0.835097	0	11	0	0	-11.0685	12.1187
1	-2.07769	R-HSA-162599	M1	1	0	Reactome Gene Sets	6	Late Phase of HIV Life Cycle	-2.07769	2.58939	3.00951	24155	139	604	9	1.49007	0.492974	2963|4927|5902|9631|10762|23165|23511|23636|55706	GTF2F2|NUP88|RANBP1|NUP155|NUP50|NUP205|NUP188|NUP62|NDC1	-0.792763	0	11	0	0	-11.0685	12.1187
1	-2.072	GO:0009161	M1	1	0	GO Biological Processes	19	ribonucleoside monophosphate metabolic process	-2.072	1.9151	2.78164	24155	355	604	17	2.81457	0.672958	204|891|3692|4907|4927|5209|5315|7371|9631|10762|23165|23511|23636|26289|55706|56975|201163	AK2|CCNB1|EIF6|NT5E|NUP88|PFKFB3|PKM|UCK2|NUP155|NUP50|NUP205|NUP188|NUP62|AK5|NDC1|FAM20C|FLCN	-0.787882	0	11	0	0	-11.0685	12.1187
1	-2.05699	GO:1900180	M1	1	0	GO Biological Processes	19	regulation of protein localization to nucleus	-2.05699	2.75805	3.03956	24155	116	604	8	1.3245	0.465171	3976|4000|5569|5743|23636|51512|55612|201163	LIF|LMNA|PKIA|PTGS2|NUP62|GTSE1|FERMT1|FLCN	-0.775836	0	11	0	0	-11.0685	12.1187
1	-2.04831	GO:0046390	M1	1	0	GO Biological Processes	19	ribose phosphate biosynthetic process	-2.04831	1.99959	2.78997	24155	300	604	15	2.48344	0.63321	204|3692|4927|5209|5315|7371|9631|10762|23165|23511|23636|26289|54898|55706|201163	AK2|EIF6|NUP88|PFKFB3|PKM|UCK2|NUP155|NUP50|NUP205|NUP188|NUP62|AK5|ELOVL2|NDC1|FLCN	-0.769389	0	11	0	0	-11.0685	12.1187
1	-10.8021	CORUM:1108	M1	1	0	CORUM	33	DNA synthesome complex (15 subunits)	-10.8021	23.995	14.2666	24155	15	604	9	1.49007	0.492974	3978|5111|5422|5424|5426|5427|5557|10714|23649	LIG1|PCNA|POLA1|POLD1|POLE|POLE2|PRIM1|POLD3|POLA2	-8.49739	0	12	1	1	-10.8021	29.9938
1	-10.8021	R-HSA-69183	M1	1	0	Reactome Gene Sets	6	Processive synthesis on the lagging strand	-10.8021	23.995	14.2666	24155	15	604	9	1.49007	0.492974	2237|3978|5111|5422|5424|5557|6117|10714|23649	FEN1|LIG1|PCNA|POLA1|POLD1|PRIM1|RPA1|POLD3|POLA2	-8.49739	0	12	0	0	-10.8021	29.9938
1	-10.1352	CORUM:1099	M1	1	0	CORUM	33	DNA synthesome complex (17 subunits)	-10.1352	21.1721	13.324	24155	17	604	9	1.49007	0.492974	5111|5422|5424|5426|5427|5557|6117|10714|23649	PCNA|POLA1|POLD1|POLE|POLE2|PRIM1|RPA1|POLD3|POLA2	-7.87071	0	12	0	0	-10.8021	29.9938
1	-10.1352	CORUM:1111	M1	1	0	CORUM	33	DNA synthesome complex (17 subunits)	-10.1352	21.1721	13.324	24155	17	604	9	1.49007	0.492974	5111|5422|5424|5426|5427|5557|6117|10714|23649	PCNA|POLA1|POLD1|POLE|POLE2|PRIM1|RPA1|POLD3|POLA2	-7.87071	0	12	0	0	-10.8021	29.9938
1	-9.41569	R-HSA-69166	M1	1	0	Reactome Gene Sets	6	Removal of the Flap Intermediate	-9.41569	22.8524	13.0977	24155	14	604	8	1.3245	0.465171	2237|5111|5422|5424|5557|6117|10714|23649	FEN1|PCNA|POLA1|POLD1|PRIM1|RPA1|POLD3|POLA2	-7.21872	0	12	0	0	-10.8021	29.9938
1	-8.05099	CORUM:1098	M1	1	0	CORUM	33	DNA synthesome complex (13 subunits)	-8.05099	21.534	11.8595	24155	13	604	7	1.15894	0.435493	5111|5422|5424|5557|6117|10714|23649	PCNA|POLA1|POLD1|PRIM1|RPA1|POLD3|POLA2	-5.9715	0	12	0	0	-10.8021	29.9938
1	-7.4653	R-HSA-113510	M1	1	0	Reactome Gene Sets	6	E2F mediated regulation of DNA replication	-7.4653	14.5424	10.1768	24155	22	604	8	1.3245	0.465171	891|5422|5515|5557|7027|23594|23649|28227	CCNB1|POLA1|PPP2CA|PRIM1|TFDP1|ORC6|POLA2|PPP2R3B	-5.45095	0	12	0	0	-10.8021	29.9938
1	-7.3374	CORUM:1107	M1	1	0	CORUM	33	DNA synthesome core complex	-7.3374	23.995	11.6474	24155	10	604	6	0.993377	0.403525	5111|5422|5424|5557|10714|23649	PCNA|POLA1|POLD1|PRIM1|POLD3|POLA2	-5.32735	0	12	0	0	-10.8021	29.9938
1	-7.31718	hsa00240	M1	1	0	KEGG Pathway	24	Pyrimidine metabolism	-7.31718	5.76804	7.80365	24155	104	604	15	2.48344	0.63321	1633|4860|4907|5422|5424|5426|5427|5557|6240|6241|7298|7371|10714|23649|124583	DCK|PNP|NT5E|POLA1|POLD1|POLE|POLE2|PRIM1|RRM1|RRM2|TYMS|UCK2|POLD3|POLA2|CANT1	-5.30927	0	12	0	0	-10.8021	29.9938
1	-6.45299	R-HSA-113501	M1	1	0	Reactome Gene Sets	6	Inhibition of replication initiation of damaged DNA by RB1/E2F1	-6.45299	18.4577	10.0828	24155	13	604	6	0.993377	0.403525	5422|5515|5557|7027|23649|28227	POLA1|PPP2CA|PRIM1|TFDP1|POLA2|PPP2R3B	-4.51747	0	12	0	0	-10.8021	29.9938
1	-6.29589	R-HSA-174430	M1	1	0	Reactome Gene Sets	6	Telomere C-strand synthesis initiation	-6.29589	24.9948	10.8702	24155	8	604	5	0.827815	0.368674	5422|5426|5427|5557|23649	POLA1|POLE|POLE2|PRIM1|POLA2	-4.38305	0	12	0	0	-10.8021	29.9938
1	-6.29589	R-HSA-68952	M1	1	0	Reactome Gene Sets	6	DNA replication initiation	-6.29589	24.9948	10.8702	24155	8	604	5	0.827815	0.368674	5422|5426|5427|5557|23649	POLA1|POLE|POLE2|PRIM1|POLA2	-4.38305	0	12	0	0	-10.8021	29.9938
1	-5.08163	hsa00230	M1	1	0	KEGG Pathway	24	Purine metabolism	-5.08163	3.6774	5.67626	24155	174	604	16	2.64901	0.653421	204|1633|4860|4907|5315|5422|5424|5426|5427|5557|6240|6241|10714|23649|26289|124583	AK2|DCK|PNP|NT5E|PKM|POLA1|POLD1|POLE|POLE2|PRIM1|RRM1|RRM2|POLD3|POLA2|AK5|CANT1	-3.29172	0	12	0	0	-10.8021	29.9938
1	-4.21414	CORUM:1100	M1	1	0	CORUM	33	DNA polymerase alpha-primase complex	-4.21414	29.9938	9.28701	24155	4	604	3	0.496689	0.28605	5422|5557|23649	POLA1|PRIM1|POLA2	-2.51881	0	12	0	0	-10.8021	29.9938
1	-10.1245	GO:0045787	M1	1	0	GO Biological Processes	19	positive regulation of cell cycle	-10.1245	3.59823	8.27336	24155	389	604	35	5.7947	0.950681	672|891|993|994|1163|1956|2124|2146|2237|3054|4085|5111|5578|5886|5902|7027|7039|8061|8091|8318|8444|9125|9493|9555|9787|9928|10615|10733|23636|29127|51203|51512|51514|79447|144455	BRCA1|CCNB1|CDC25A|CDC25B|CKS1B|EGFR|EVI2B|EZH2|FEN1|HCFC1|MAD2L1|PCNA|PRKCA|RAD23A|RANBP1|TFDP1|TGFA|FOSL1|HMGA2|CDC45|DYRK3|CNOT9|KIF23|MACROH2A1|DLGAP5|KIF14|SPAG5|PLK4|NUP62|RACGAP1|NUSAP1|GTSE1|DTL|PAGR1|E2F7	-7.86382	0	13	1	1	-10.1245	4.52736
1	-9.27879	GO:0090068	M1	1	0	GO Biological Processes	19	positive regulation of cell cycle process	-9.27879	3.89181	8.04412	24155	298	604	29	4.80132	0.869916	672|891|993|994|1956|2146|2237|4085|5111|5902|7027|7039|8091|8318|8444|9125|9493|9555|9787|9928|10615|10733|23636|29127|51203|51512|51514|79447|144455	BRCA1|CCNB1|CDC25A|CDC25B|EGFR|EZH2|FEN1|MAD2L1|PCNA|RANBP1|TFDP1|TGFA|HMGA2|CDC45|DYRK3|CNOT9|KIF23|MACROH2A1|DLGAP5|KIF14|SPAG5|PLK4|NUP62|RACGAP1|NUSAP1|GTSE1|DTL|PAGR1|E2F7	-7.0851	0	13	0	0	-10.1245	4.52736
1	-4.19515	GO:0045931	M1	1	0	GO Biological Processes	19	positive regulation of mitotic cell cycle	-4.19515	3.43487	4.99511	24155	163	604	14	2.31788	0.612258	891|993|994|1956|4085|5578|5902|7039|8318|9555|9787|23636|51203|51514	CCNB1|CDC25A|CDC25B|EGFR|MAD2L1|PRKCA|RANBP1|TGFA|CDC45|MACROH2A1|DLGAP5|NUP62|NUSAP1|DTL	-2.506	0	13	0	0	-10.1245	4.52736
1	-2.69482	GO:0045840	M1	1	0	GO Biological Processes	19	positive regulation of mitotic nuclear division	-2.69482	4.52736	4.1169	24155	53	604	6	0.993377	0.403525	5902|7039|9555|9787|23636|51203	RANBP1|TGFA|MACROH2A1|DLGAP5|NUP62|NUSAP1	-1.25867	0	13	0	0	-10.1245	4.52736
1	-2.21547	GO:0051785	M1	1	0	GO Biological Processes	19	positive regulation of nuclear division	-2.21547	3.63561	3.43362	24155	66	604	6	0.993377	0.403525	5902|7039|9555|9787|23636|51203	RANBP1|TGFA|MACROH2A1|DLGAP5|NUP62|NUSAP1	-0.894876	0	13	0	0	-10.1245	4.52736
1	-9.22587	R-HSA-72203	M1	1	0	Reactome Gene Sets	6	Processing of Capped Intron-Containing Pre-mRNA	-9.22587	4.26141	8.19993	24155	244	604	26	4.30464	0.825839	1479|1665|2963|3178|3181|3184|4670|4927|6426|6427|6627|6637|8683|9631|10212|10250|10262|10762|11100|23165|23511|23636|26097|29107|55339|55706	CSTF3|DHX15|GTF2F2|HNRNPA1|HNRNPA2B1|HNRNPD|HNRNPM|NUP88|SRSF1|SRSF2|SNRPA1|SNRPG|SRSF9|NUP155|DDX39A|SRRM1|SF3B4|NUP50|HNRNPUL1|NUP205|NUP188|NUP62|CHTOP|NXT1|WDR33|NDC1	-7.04505	0	14	1	1	-9.22587	7.99834
1	-4.80529	R-HSA-72163	M1	1	0	Reactome Gene Sets	6	mRNA Splicing - Major Pathway	-4.80529	3.49654	5.42901	24155	183	604	16	2.64901	0.653421	1479|1665|2963|3178|3181|3184|4670|6426|6427|6627|6637|8683|10250|10262|11100|55339	CSTF3|DHX15|GTF2F2|HNRNPA1|HNRNPA2B1|HNRNPD|HNRNPM|SRSF1|SRSF2|SNRPA1|SNRPG|SRSF9|SRRM1|SF3B4|HNRNPUL1|WDR33	-3.05595	0	14	0	0	-9.22587	7.99834
1	-4.59421	GO:0031123	M1	1	0	GO Biological Processes	19	RNA 3'-end processing	-4.59421	3.73256	5.37617	24155	150	604	14	2.31788	0.612258	891|1479|5393|6426|6427|8683|10212|10250|11340|26097|55339|64506|79882|118460	CCNB1|CSTF3|EXOSC9|SRSF1|SRSF2|SRSF9|DDX39A|SRRM1|EXOSC8|CHTOP|WDR33|CPEB1|ZC3H14|EXOSC6	-2.86438	0	14	0	0	-9.22587	7.99834
1	-4.57504	R-HSA-72172	M1	1	0	Reactome Gene Sets	6	mRNA Splicing	-4.57504	3.35009	5.22192	24155	191	604	16	2.64901	0.653421	1479|1665|2963|3178|3181|3184|4670|6426|6427|6627|6637|8683|10250|10262|11100|55339	CSTF3|DHX15|GTF2F2|HNRNPA1|HNRNPA2B1|HNRNPD|HNRNPM|SRSF1|SRSF2|SNRPA1|SNRPG|SRSF9|SRRM1|SF3B4|HNRNPUL1|WDR33	-2.84745	0	14	0	0	-9.22587	7.99834
1	-4.46627	GO:0031124	M1	1	0	GO Biological Processes	19	mRNA 3'-end processing	-4.46627	4.48887	5.54224	24155	98	604	11	1.82119	0.544087	891|1479|6426|6427|8683|10212|10250|26097|55339|64506|79882	CCNB1|CSTF3|SRSF1|SRSF2|SRSF9|DDX39A|SRRM1|CHTOP|WDR33|CPEB1|ZC3H14	-2.74752	0	14	0	0	-9.22587	7.99834
1	-4.37362	R-HSA-73856	M1	1	0	Reactome Gene Sets	6	RNA Polymerase II Transcription Termination	-4.37362	5.37202	5.73889	24155	67	604	9	1.49007	0.492974	1479|6426|6427|6637|8683|10212|10250|26097|55339	CSTF3|SRSF1|SRSF2|SNRPG|SRSF9|DDX39A|SRRM1|CHTOP|WDR33	-2.65922	0	14	0	0	-9.22587	7.99834
1	-4.07125	CORUM:1183	M1	1	0	CORUM	33	CDC5L complex	-4.07125	7.99834	6.14229	24155	30	604	6	0.993377	0.403525	3608|6426|6427|6627|10250|10262	ILF2|SRSF1|SRSF2|SNRPA1|SRRM1|SF3B4	-2.40109	0	14	0	0	-9.22587	7.99834
1	-4.0315	R-HSA-72187	M1	1	0	Reactome Gene Sets	6	mRNA 3'-end processing	-4.0315	5.5161	5.51448	24155	58	604	8	1.3245	0.465171	1479|6426|6427|8683|10212|10250|26097|55339	CSTF3|SRSF1|SRSF2|SRSF9|DDX39A|SRRM1|CHTOP|WDR33	-2.36524	0	14	0	0	-9.22587	7.99834
1	-3.60414	GO:0000377	M1	1	0	GO Biological Processes	19	RNA splicing, via transesterification reactions with bulged adenosine as nucleophile	-3.60414	2.32142	4.1524	24155	379	604	22	3.64238	0.762285	1479|1665|2963|3178|3181|3184|4670|6426|6427|6627|6637|8683|10212|10250|10262|10492|10657|11100|11168|26528|55339|58155	CSTF3|DHX15|GTF2F2|HNRNPA1|HNRNPA2B1|HNRNPD|HNRNPM|SRSF1|SRSF2|SNRPA1|SNRPG|SRSF9|DDX39A|SRRM1|SF3B4|SYNCRIP|KHDRBS1|HNRNPUL1|PSIP1|DAZAP1|WDR33|PTBP2	-2.00093	0	14	0	0	-9.22587	7.99834
1	-3.60414	GO:0000398	M1	1	0	GO Biological Processes	19	mRNA splicing, via spliceosome	-3.60414	2.32142	4.1524	24155	379	604	22	3.64238	0.762285	1479|1665|2963|3178|3181|3184|4670|6426|6427|6627|6637|8683|10212|10250|10262|10492|10657|11100|11168|26528|55339|58155	CSTF3|DHX15|GTF2F2|HNRNPA1|HNRNPA2B1|HNRNPD|HNRNPM|SRSF1|SRSF2|SNRPA1|SNRPG|SRSF9|DDX39A|SRRM1|SF3B4|SYNCRIP|KHDRBS1|HNRNPUL1|PSIP1|DAZAP1|WDR33|PTBP2	-2.00093	0	14	0	0	-9.22587	7.99834
1	-3.55675	GO:0000375	M1	1	0	GO Biological Processes	19	RNA splicing, via transesterification reactions	-3.55675	2.30319	4.11155	24155	382	604	22	3.64238	0.762285	1479|1665|2963|3178|3181|3184|4670|6426|6427|6627|6637|8683|10212|10250|10262|10492|10657|11100|11168|26528|55339|58155	CSTF3|DHX15|GTF2F2|HNRNPA1|HNRNPA2B1|HNRNPD|HNRNPM|SRSF1|SRSF2|SNRPA1|SNRPG|SRSF9|DDX39A|SRRM1|SF3B4|SYNCRIP|KHDRBS1|HNRNPUL1|PSIP1|DAZAP1|WDR33|PTBP2	-1.95854	0	14	0	0	-9.22587	7.99834
1	-3.25201	hsa03040	M1	1	0	KEGG Pathway	24	Spliceosome	-3.25201	3.2829	4.24378	24155	134	604	11	1.82119	0.544087	1665|3178|3310|4670|6426|6427|6627|6637|8683|10262|10915	DHX15|HNRNPA1|HSPA6|HNRNPM|SRSF1|SRSF2|SNRPA1|SNRPG|SRSF9|SF3B4|TCERG1	-1.70679	0	14	0	0	-9.22587	7.99834
1	-3.17119	GO:0050684	M1	1	0	GO Biological Processes	19	regulation of mRNA processing	-3.17119	3.21101	4.15615	24155	137	604	11	1.82119	0.544087	891|3178|3181|6426|6427|8683|10262|10657|26528|64506|79882	CCNB1|HNRNPA1|HNRNPA2B1|SRSF1|SRSF2|SRSF9|SF3B4|KHDRBS1|DAZAP1|CPEB1|ZC3H14	-1.64033	0	14	0	0	-9.22587	7.99834
1	-3.09654	CORUM:1181	M1	1	0	CORUM	33	C complex spliceosome	-3.09654	4.04979	4.34811	24155	79	604	8	1.3245	0.465171	3178|3181|4670|6426|6627|6637|10250|10492	HNRNPA1|HNRNPA2B1|HNRNPM|SRSF1|SNRPA1|SNRPG|SRRM1|SYNCRIP	-1.58586	0	14	0	0	-9.22587	7.99834
1	-3.06723	CORUM:351	M1	1	0	CORUM	33	Spliceosome	-3.06723	3.11992	4.04302	24155	141	604	11	1.82119	0.544087	1665|6426|6427|6627|6637|7756|8683|10250|10262|10643|10915	DHX15|SRSF1|SRSF2|SNRPA1|SNRPG|ZNF207|SRSF9|SRRM1|SF3B4|IGF2BP3|TCERG1	-1.56194	0	14	0	0	-9.22587	7.99834
1	-2.90154	GO:0006397	M1	1	0	GO Biological Processes	19	mRNA processing	-2.90154	1.92197	3.47327	24155	541	604	26	4.30464	0.825839	891|1479|1665|2963|3178|3181|3184|4670|6426|6427|6627|6637|8683|10212|10250|10262|10492|10657|11100|11168|26097|26528|55339|58155|64506|79882	CCNB1|CSTF3|DHX15|GTF2F2|HNRNPA1|HNRNPA2B1|HNRNPD|HNRNPM|SRSF1|SRSF2|SNRPA1|SNRPG|SRSF9|DDX39A|SRRM1|SF3B4|SYNCRIP|KHDRBS1|HNRNPUL1|PSIP1|CHTOP|DAZAP1|WDR33|PTBP2|CPEB1|ZC3H14	-1.42411	0	14	0	0	-9.22587	7.99834
1	-2.89345	CORUM:2755	M1	1	0	CORUM	33	17S U2 snRNP	-2.89345	6.05935	4.65751	24155	33	604	5	0.827815	0.368674	1665|6426|6627|6637|10262	DHX15|SRSF1|SNRPA1|SNRPG|SF3B4	-1.41852	0	14	0	0	-9.22587	7.99834
1	-2.74241	GO:0008380	M1	1	0	GO Biological Processes	19	RNA splicing	-2.74241	1.96121	3.36643	24155	469	604	23	3.80795	0.778747	1479|1665|2963|3178|3181|3184|4670|5515|6426|6427|6627|6637|8683|10212|10250|10262|10492|10657|11100|11168|26528|55339|58155	CSTF3|DHX15|GTF2F2|HNRNPA1|HNRNPA2B1|HNRNPD|HNRNPM|PPP2CA|SRSF1|SRSF2|SNRPA1|SNRPG|SRSF9|DDX39A|SRRM1|SF3B4|SYNCRIP|KHDRBS1|HNRNPUL1|PSIP1|DAZAP1|WDR33|PTBP2	-1.29819	0	14	0	0	-9.22587	7.99834
1	-2.49485	GO:0048024	M1	1	0	GO Biological Processes	19	regulation of mRNA splicing, via spliceosome	-2.49485	3.26463	3.59748	24155	98	604	8	1.3245	0.465171	3178|3181|6426|6427|8683|10262|10657|26528	HNRNPA1|HNRNPA2B1|SRSF1|SRSF2|SRSF9|SF3B4|KHDRBS1|DAZAP1	-1.10775	0	14	0	0	-9.22587	7.99834
1	-2.1576	GO:0043484	M1	1	0	GO Biological Processes	19	regulation of RNA splicing	-2.1576	2.66611	3.10881	24155	135	604	9	1.49007	0.492974	3178|3181|6426|6427|8683|10262|10657|26528|58155	HNRNPA1|HNRNPA2B1|SRSF1|SRSF2|SRSF9|SF3B4|KHDRBS1|DAZAP1|PTBP2	-0.855838	0	14	0	0	-9.22587	7.99834
1	-2.02237	R-HSA-72165	M1	1	0	Reactome Gene Sets	6	mRNA Splicing - Minor Pathway	-2.02237	3.84536	3.28936	24155	52	604	5	0.827815	0.368674	2963|6426|6427|6637|10262	GTF2F2|SRSF1|SRSF2|SNRPG|SF3B4	-0.748584	0	14	0	0	-9.22587	7.99834
1	-9.01762	M129	M1	1	0	Canonical Pathways	11	PID PLK1 PATHWAY	-9.01762	10.4326	10.2549	24155	46	604	12	1.98675	0.567801	699|701|891|994|5515|7283|9055|10112|22974|54821|79682|151648	BUB1|BUB1B|CCNB1|CDC25B|PPP2CA|TUBG1|PRC1|KIF20A|TPX2|ERCC6L|CENPU|SGO1	-6.85237	0	15	1	1	-9.01762	10.4326
1	-3.01247	GO:0007062	M1	1	0	GO Biological Processes	19	sister chromatid cohesion	-3.01247	4.44352	4.38274	24155	63	604	7	1.15894	0.435493	699|701|2237|9126|9555|83903|151648	BUB1|BUB1B|FEN1|SMC3|MACROH2A1|HASPIN|SGO1	-1.51513	0	15	0	0	-9.01762	10.4326
1	-2.53886	GO:0070601	M1	1	0	GO Biological Processes	19	centromeric sister chromatid cohesion	-2.53886	9.99793	4.99282	24155	12	604	3	0.496689	0.28605	699|701|151648	BUB1|BUB1B|SGO1	-1.14352	0	15	0	0	-9.01762	10.4326
1	-8.43289	M40	M1	1	0	Canonical Pathways	11	PID E2F PATHWAY	-8.43289	7.566	9.05916	24155	74	604	14	2.31788	0.612258	672|993|1719|4172|5054|5422|5902|5932|6240|6241|7027|7298|23468|144455	BRCA1|CDC25A|DHFR|MCM3|SERPINE1|POLA1|RANBP1|RBBP8|RRM1|RRM2|TFDP1|TYMS|CBX5|E2F7	-6.31125	0	16	1	1	-8.43289	11.0322
1	-6.40461	GO:0000083	M1	1	0	GO Biological Processes	19	regulation of transcription involved in G1/S transition of mitotic cell cycle	-6.40461	11.0322	8.65687	24155	29	604	8	1.3245	0.465171	1719|5111|5422|6241|7027|7298|8318|144455	DHFR|PCNA|POLA1|RRM2|TFDP1|TYMS|CDC45|E2F7	-4.48152	0	16	0	0	-8.43289	11.0322
1	-5.354	R-HSA-69205	M1	1	0	Reactome Gene Sets	6	G1/S-Specific Transcription	-5.354	9.99793	7.62919	24155	28	604	7	1.15894	0.435493	1719|5111|5422|6241|7027|7298|8318	DHFR|PCNA|POLA1|RRM2|TFDP1|TYMS|CDC45	-3.52922	0	16	0	0	-8.43289	11.0322
1	-8.33494	GO:0006284	M1	1	0	GO Biological Processes	19	base-excision repair	-8.33494	10.474	9.84106	24155	42	604	11	1.82119	0.544087	2237|3159|3978|5111|5424|5426|6117|8091|10721|55247|252969	FEN1|HMGA1|LIG1|PCNA|POLD1|POLE|RPA1|HMGA2|POLQ|NEIL3|NEIL2	-6.23224	0	17	1	1	-8.33494	39.9917
1	-7.75944	R-HSA-5358565	M1	1	0	Reactome Gene Sets	6	Mismatch repair (MMR) directed by MSH2:MSH6 (MutSalpha)	-7.75944	19.9959	11.3855	24155	14	604	7	1.15894	0.435493	2956|3978|5111|5424|6117|9156|10714	MSH6|LIG1|PCNA|POLD1|RPA1|EXO1|POLD3	-5.71374	0	17	0	0	-8.33494	39.9917
1	-7.49592	R-HSA-5358508	M1	1	0	Reactome Gene Sets	6	Mismatch Repair	-7.49592	18.6628	10.9583	24155	15	604	7	1.15894	0.435493	2956|3978|5111|5424|6117|9156|10714	MSH6|LIG1|PCNA|POLD1|RPA1|EXO1|POLD3	-5.47941	0	17	0	0	-8.33494	39.9917
1	-7.0901	hsa03410	M1	1	0	KEGG Pathway	24	Base excision repair	-7.0901	10.9068	9.11997	24155	33	604	9	1.49007	0.492974	2237|3978|5111|5424|5426|5427|10714|55247|252969	FEN1|LIG1|PCNA|POLD1|POLE|POLE2|POLD3|NEIL3|NEIL2	-5.10094	0	17	0	0	-8.33494	39.9917
1	-7.00427	R-HSA-174414	M1	1	0	Reactome Gene Sets	6	Processive synthesis on the C-strand of the telomere	-7.00427	21.8137	11.0573	24155	11	604	6	0.993377	0.403525	2237|3978|5111|5424|6117|10714	FEN1|LIG1|PCNA|POLD1|RPA1|POLD3	-5.02319	0	17	0	0	-8.33494	39.9917
1	-6.45299	CORUM:1004	M1	1	0	CORUM	33	RC complex during S-phase of cell cycle	-6.45299	18.4577	10.0828	24155	13	604	6	0.993377	0.403525	3978|5422|5424|5426|5982|6117	LIG1|POLA1|POLD1|POLE|RFC2|RPA1	-4.51747	0	17	0	0	-8.33494	39.9917
1	-6.45299	CORUM:1005	M1	1	0	CORUM	33	RC complex during G2/M-phase of cell cycle	-6.45299	18.4577	10.0828	24155	13	604	6	0.993377	0.403525	891|5422|5424|5426|5982|6117	CCNB1|POLA1|POLD1|POLE|RFC2|RPA1	-4.51747	0	17	0	0	-8.33494	39.9917
1	-6.21924	R-HSA-5358606	M1	1	0	Reactome Gene Sets	6	Mismatch repair (MMR) directed by MSH2:MSH3 (MutSbeta)	-6.21924	17.1393	9.67341	24155	14	604	6	0.993377	0.403525	3978|5111|5424|6117|9156|10714	LIG1|PCNA|POLD1|RPA1|EXO1|POLD3	-4.30824	0	17	0	0	-8.33494	39.9917
1	-5.66078	R-HSA-174437	M1	1	0	Reactome Gene Sets	6	Removal of the Flap Intermediate from the C-strand	-5.66078	19.9959	9.62174	24155	10	604	5	0.827815	0.368674	2237|5111|5424|6117|10714	FEN1|PCNA|POLD1|RPA1|POLD3	-3.80862	0	17	0	0	-8.33494	39.9917
1	-5.43409	GO:0006298	M1	1	0	GO Biological Processes	19	mismatch repair	-5.43409	8.41931	7.32997	24155	38	604	8	1.3245	0.465171	2956|3978|5111|5424|6117|9156|10535|10714	MSH6|LIG1|PCNA|POLD1|RPA1|EXO1|RNASEH2A|POLD3	-3.60227	0	17	0	0	-8.33494	39.9917
1	-5.17188	GO:0045005	M1	1	0	GO Biological Processes	19	DNA-dependent DNA replication maintenance of fidelity	-5.17188	7.80326	6.98205	24155	41	604	8	1.3245	0.465171	5111|5424|5426|8914|29980|51750|54962|64710	PCNA|POLD1|POLE|TIMELESS|DONSON|RTEL1|TIPIN|NUCKS1	-3.36622	0	17	0	0	-8.33494	39.9917
1	-4.80802	GO:0006272	M1	1	0	GO Biological Processes	19	leading strand elongation	-4.80802	39.9917	10.816	24155	3	604	3	0.496689	0.28605	5111|5422|5426	PCNA|POLA1|POLE	-3.0575	0	17	0	0	-8.33494	39.9917
1	-4.19789	hsa03440	M1	1	0	KEGG Pathway	24	Homologous recombination	-4.19789	6.82785	5.98101	24155	41	604	7	1.15894	0.435493	672|5424|5932|6117|8438|10714|25788	BRCA1|POLD1|RBBP8|RPA1|RAD54L|POLD3|RAD54B	-2.50771	0	17	0	0	-8.33494	39.9917
1	-3.82437	CORUM:297	M1	1	0	CORUM	33	PCNA-DNA polymerase delta complex	-3.82437	23.995	8.2351	24155	5	604	3	0.496689	0.28605	5111|5424|10714	PCNA|POLD1|POLD3	-2.18169	0	17	0	0	-8.33494	39.9917
1	-3.5315	GO:0006287	M1	1	0	GO Biological Processes	19	base-excision repair, gap-filling	-3.5315	19.9959	7.45235	24155	6	604	3	0.496689	0.28605	5111|5424|5426	PCNA|POLD1|POLE	-1.94555	0	17	0	0	-8.33494	39.9917
1	-6.81709	R-HSA-2262752	M1	1	0	Reactome Gene Sets	6	Cellular responses to stress	-6.81709	2.88984	6.32486	24155	429	604	31	5.13245	0.897848	2146|3014|3015|3159|3310|3320|3569|4927|5701|5708|5718|6117|7027|7846|8091|8364|9631|10197|10376|10381|10383|10762|10808|23043|23165|23511|23512|23636|55706|84790|94239	EZH2|H2AX|H2AZ1|HMGA1|HSPA6|HSP90AA1|IL6|NUP88|PSMC2|PSMD2|PSMD12|RPA1|TFDP1|TUBA1A|HMGA2|H4C3|NUP155|PSME3|TUBA1B|TUBB3|TUBB4B|NUP50|HSPH1|TNIK|NUP205|NUP188|SUZ12|NUP62|NDC1|TUBA1C|H2AZ2	-4.8498	0	18	1	1	-6.81709	2.88984
1	-6.35952	GO:0080135	M1	1	0	GO Biological Processes	19	regulation of cellular response to stress	-6.35952	2.29592	5.76984	24155	749	604	43	7.11921	1.04631	672|960|1719|1956|2150|2305|3014|3082|3159|3320|3776|4314|4927|5111|5743|5792|6117|7074|7468|7477|8091|8444|8914|9631|10371|10635|10721|10762|10808|23043|23165|23511|23636|26191|26585|27178|27429|51750|55706|55872|79000|79968|83596	BRCA1|CD44|DHFR|EGFR|F2RL1|FOXM1|H2AX|HGF|HMGA1|HSP90AA1|KCNK2|MMP3|NUP88|PCNA|PTGS2|PTPRF|RPA1|TIAM1|NSD2|WNT7B|HMGA2|DYRK3|TIMELESS|NUP155|SEMA3A|RAD51AP1|POLQ|NUP50|HSPH1|TNIK|NUP205|NUP188|NUP62|PTPN22|GREM1|IL37|HTRA2|RTEL1|NDC1|PBK|AUNIP|WDR76|BCL2L12	-4.43818	0	18	0	0	-6.81709	2.88984
1	-4.98171	R-HSA-8953897	M1	1	0	Reactome Gene Sets	6	Cellular responses to external stimuli	-4.98171	2.36142	5.05065	24155	525	604	31	5.13245	0.897848	2146|3014|3015|3159|3310|3320|3569|4927|5701|5708|5718|6117|7027|7846|8091|8364|9631|10197|10376|10381|10383|10762|10808|23043|23165|23511|23512|23636|55706|84790|94239	EZH2|H2AX|H2AZ1|HMGA1|HSPA6|HSP90AA1|IL6|NUP88|PSMC2|PSMD2|PSMD12|RPA1|TFDP1|TUBA1A|HMGA2|H4C3|NUP155|PSME3|TUBA1B|TUBB3|TUBB4B|NUP50|HSPH1|TNIK|NUP205|NUP188|SUZ12|NUP62|NDC1|TUBA1C|H2AZ2	-3.20575	0	18	0	0	-6.81709	2.88984
1	-6.68672	R-HSA-983189	M1	1	0	Reactome Gene Sets	6	Kinesins	-6.68672	7.45608	7.95117	24155	59	604	11	1.82119	0.544087	3832|7846|9493|10112|10376|10381|10383|24137|29127|56992|84790	KIF11|TUBA1A|KIF23|KIF20A|TUBA1B|TUBB3|TUBB4B|KIF4A|RACGAP1|KIF15|TUBA1C	-4.73467	0	19	1	1	-6.68672	11.1088
1	-6.34898	R-HSA-8852276	M1	1	0	Reactome Gene Sets	6	The role of GTSE1 in G2/M progression after G2 checkpoint	-6.34898	6.23248	7.36463	24155	77	604	12	1.98675	0.567801	891|3320|5701|5708|5718|7846|10197|10376|10381|10383|51512|84790	CCNB1|HSP90AA1|PSMC2|PSMD2|PSMD12|TUBA1A|PSME3|TUBA1B|TUBB3|TUBB4B|GTSE1|TUBA1C	-4.42938	0	19	0	0	-6.68672	11.1088
1	-6.02576	hsa05130	M1	1	0	KEGG Pathway	24	Pathogenic Escherichia coli infection	-6.02576	7.27122	7.45647	24155	55	604	10	1.65563	0.519204	5578|7534|7846|10376|10381|10383|10552|10971|23643|84790	PRKCA|YWHAZ|TUBA1A|TUBA1B|TUBB3|TUBB4B|ARPC1A|YWHAQ|LY96|TUBA1C	-4.1331	0	19	0	0	-6.68672	11.1088
1	-5.277	R-HSA-983231	M1	1	0	Reactome Gene Sets	6	Factors involved in megakaryocyte development and platelet production	-5.277	3.80874	5.8504	24155	168	604	16	2.64901	0.653421	1794|3832|4602|7846|9493|10112|10376|10381|10383|23468|23764|24137|29127|55619|56992|84790	DOCK2|KIF11|MYB|TUBA1A|KIF23|KIF20A|TUBA1B|TUBB3|TUBB4B|CBX5|MAFF|KIF4A|RACGAP1|DOCK10|KIF15|TUBA1C	-3.45915	0	19	0	0	-6.68672	11.1088
1	-5.19308	R-HSA-8856688	M1	1	0	Reactome Gene Sets	6	Golgi-to-ER retrograde transport	-5.19308	4.20965	5.94412	24155	133	604	14	2.31788	0.612258	372|636|3832|5050|7846|9493|10112|10376|10381|10383|24137|29127|56992|84790	ARCN1|BICD1|KIF11|PAFAH1B3|TUBA1A|KIF23|KIF20A|TUBA1B|TUBB3|TUBB4B|KIF4A|RACGAP1|KIF15|TUBA1C	-3.3834	0	19	0	0	-6.68672	11.1088
1	-5.16518	R-HSA-6811434	M1	1	0	Reactome Gene Sets	6	COPI-dependent Golgi-to-ER retrograde traffic	-5.16518	4.84748	6.14314	24155	99	604	12	1.98675	0.567801	372|3832|7846|9493|10112|10376|10381|10383|24137|29127|56992|84790	ARCN1|KIF11|TUBA1A|KIF23|KIF20A|TUBA1B|TUBB3|TUBB4B|KIF4A|RACGAP1|KIF15|TUBA1C	-3.36107	0	19	0	0	-6.68672	11.1088
1	-5.10719	R-HSA-109582	M1	1	0	Reactome Gene Sets	6	Hemostasis	-5.10719	2.25396	5.0698	24155	621	604	35	5.7947	0.950681	805|960|1794|3082|3655|3673|3778|3832|4602|5054|5055|5327|5329|5515|5578|5671|5678|5880|6382|7534|7846|8797|9493|10112|10376|10381|10383|10544|23468|23764|24137|29127|55619|56992|84790	CALM2|CD44|DOCK2|HGF|ITGA6|ITGA2|KCNMA1|KIF11|MYB|SERPINE1|SERPINB2|PLAT|PLAUR|PPP2CA|PRKCA|PSG3|PSG9|RAC2|SDC1|YWHAZ|TUBA1A|TNFRSF10A|KIF23|KIF20A|TUBA1B|TUBB3|TUBB4B|PROCR|CBX5|MAFF|KIF4A|RACGAP1|DOCK10|KIF15|TUBA1C	-3.3134	0	19	0	0	-6.68672	11.1088
1	-4.20151	R-HSA-190840	M1	1	0	Reactome Gene Sets	6	Microtubule-dependent trafficking of connexons from Golgi to the plasma membrane	-4.20151	11.1088	6.87073	24155	18	604	5	0.827815	0.368674	7846|10376|10381|10383|84790	TUBA1A|TUBA1B|TUBB3|TUBB4B|TUBA1C	-2.50825	0	19	0	0	-6.68672	11.1088
1	-4.15893	R-HSA-9619483	M1	1	0	Reactome Gene Sets	6	Activation of AMPK downstream of NMDARs	-4.15893	8.27415	6.27692	24155	29	604	6	0.993377	0.403525	805|7846|10376|10381|10383|84790	CALM2|TUBA1A|TUBA1B|TUBB3|TUBB4B|TUBA1C	-2.47395	0	19	0	0	-6.68672	11.1088
1	-4.07788	R-HSA-190872	M1	1	0	Reactome Gene Sets	6	Transport of connexons to the plasma membrane	-4.07788	10.5241	6.65086	24155	19	604	5	0.827815	0.368674	7846|10376|10381|10383|84790	TUBA1A|TUBA1B|TUBB3|TUBB4B|TUBA1C	-2.40478	0	19	0	0	-6.68672	11.1088
1	-3.90608	R-HSA-5626467	M1	1	0	Reactome Gene Sets	6	RHO GTPases activate IQGAPs	-3.90608	7.49845	5.89084	24155	32	604	6	0.993377	0.403525	805|7846|10376|10381|10383|84790	CALM2|TUBA1A|TUBA1B|TUBB3|TUBB4B|TUBA1C	-2.25318	0	19	0	0	-6.68672	11.1088
1	-3.74984	R-HSA-389977	M1	1	0	Reactome Gene Sets	6	Post-chaperonin tubulin folding pathway	-3.74984	9.08903	6.07869	24155	22	604	5	0.827815	0.368674	7846|10376|10381|10383|84790	TUBA1A|TUBA1B|TUBB3|TUBB4B|TUBA1C	-2.12249	0	19	0	0	-6.68672	11.1088
1	-3.7382	R-HSA-6811442	M1	1	0	Reactome Gene Sets	6	Intra-Golgi and retrograde Golgi-to-ER traffic	-3.7382	2.96968	4.50195	24155	202	604	15	2.48344	0.63321	372|636|2803|3832|5050|7846|9493|10112|10376|10381|10383|24137|29127|56992|84790	ARCN1|BICD1|GOLGA4|KIF11|PAFAH1B3|TUBA1A|KIF23|KIF20A|TUBA1B|TUBB3|TUBB4B|KIF4A|RACGAP1|KIF15|TUBA1C	-2.11174	0	19	0	0	-6.68672	11.1088
1	-3.69731	R-HSA-373760	M1	1	0	Reactome Gene Sets	6	L1CAM interactions	-3.69731	3.69671	4.72265	24155	119	604	11	1.82119	0.544087	1956|2048|2596|3673|7846|10376|10381|10383|24137|84790|284217	EGFR|EPHB2|GAP43|ITGA2|TUBA1A|TUBA1B|TUBB3|TUBB4B|KIF4A|TUBA1C|LAMA1	-2.07874	0	19	0	0	-6.68672	11.1088
1	-3.57982	R-HSA-6811436	M1	1	0	Reactome Gene Sets	6	COPI-independent Golgi-to-ER retrograde traffic	-3.57982	5.48906	5.1393	24155	51	604	7	1.15894	0.435493	636|5050|7846|10376|10381|10383|84790	BICD1|PAFAH1B3|TUBA1A|TUBA1B|TUBB3|TUBB4B|TUBA1C	-1.97912	0	19	0	0	-6.68672	11.1088
1	-3.57132	R-HSA-2132295	M1	1	0	Reactome Gene Sets	6	MHC class II antigen presentation	-3.57132	3.5765	4.5877	24155	123	604	11	1.82119	0.544087	3832|7846|9493|10112|10376|10381|10383|24137|29127|56992|84790	KIF11|TUBA1A|KIF23|KIF20A|TUBA1B|TUBB3|TUBB4B|KIF4A|RACGAP1|KIF15|TUBA1C	-1.97228	0	19	0	0	-6.68672	11.1088
1	-3.47194	R-HSA-389960	M1	1	0	Reactome Gene Sets	6	Formation of tubulin folding intermediates by CCT/TriC	-3.47194	7.99834	5.60654	24155	25	604	5	0.827815	0.368674	7846|10376|10381|10383|84790	TUBA1A|TUBA1B|TUBB3|TUBB4B|TUBA1C	-1.89476	0	19	0	0	-6.68672	11.1088
1	-3.36878	R-HSA-1445148	M1	1	0	Reactome Gene Sets	6	Translocation of SLC2A4 (GLUT4) to the plasma membrane	-3.36878	4.44352	4.68622	24155	72	604	8	1.3245	0.465171	805|7534|7846|10376|10381|10383|10971|84790	CALM2|YWHAZ|TUBA1A|TUBA1B|TUBB3|TUBB4B|YWHAQ|TUBA1C	-1.80483	0	19	0	0	-6.68672	11.1088
1	-3.04822	R-HSA-5653656	M1	1	0	Reactome Gene Sets	6	Vesicle-mediated transport	-3.04822	1.84211	3.54829	24155	673	604	31	5.13245	0.897848	274|372|636|805|1839|1956|2803|3320|3832|5050|7039|7534|7846|8533|8871|9493|9610|10112|10376|10381|10383|10552|10808|10971|24137|29127|56992|57706|79890|84251|84790	BIN1|ARCN1|BICD1|CALM2|HBEGF|EGFR|GOLGA4|HSP90AA1|KIF11|PAFAH1B3|TGFA|YWHAZ|TUBA1A|COPS3|SYNJ2|KIF23|RIN1|KIF20A|TUBA1B|TUBB3|TUBB4B|ARPC1A|HSPH1|YWHAQ|KIF4A|RACGAP1|KIF15|DENND1A|RIN3|SGIP1|TUBA1C	-1.54514	0	19	0	0	-6.68672	11.1088
1	-2.97007	R-HSA-437239	M1	1	0	Reactome Gene Sets	6	Recycling pathway of L1	-2.97007	5.10533	4.51154	24155	47	604	6	0.993377	0.403525	7846|10376|10381|10383|24137|84790	TUBA1A|TUBA1B|TUBB3|TUBB4B|KIF4A|TUBA1C	-1.47989	0	19	0	0	-6.68672	11.1088
1	-2.95588	R-HSA-389958	M1	1	0	Reactome Gene Sets	6	Cooperation of Prefoldin and TriC/CCT in actin and tubulin folding	-2.95588	6.24871	4.75795	24155	32	604	5	0.827815	0.368674	7846|10376|10381|10383|84790	TUBA1A|TUBA1B|TUBB3|TUBB4B|TUBA1C	-1.46957	0	19	0	0	-6.68672	11.1088
1	-2.8422	R-HSA-199991	M1	1	0	Reactome Gene Sets	6	Membrane Trafficking	-2.8422	1.82927	3.38862	24155	634	604	29	4.80132	0.869916	274|372|636|805|1839|1956|2803|3832|5050|7039|7534|7846|8533|8871|9493|9610|10112|10376|10381|10383|10552|10971|24137|29127|56992|57706|79890|84251|84790	BIN1|ARCN1|BICD1|CALM2|HBEGF|EGFR|GOLGA4|KIF11|PAFAH1B3|TGFA|YWHAZ|TUBA1A|COPS3|SYNJ2|KIF23|RIN1|KIF20A|TUBA1B|TUBB3|TUBB4B|ARPC1A|YWHAQ|KIF4A|RACGAP1|KIF15|DENND1A|RIN3|SGIP1|TUBA1C	-1.38079	0	19	0	0	-6.68672	11.1088
1	-2.78977	hsa04540	M1	1	0	KEGG Pathway	24	Gap junction	-2.78977	3.63561	3.96661	24155	88	604	8	1.3245	0.465171	1956|5578|7846|10376|10381|10383|56034|84790	EGFR|PRKCA|TUBA1A|TUBA1B|TUBB3|TUBB4B|PDGFC|TUBA1C	-1.33286	0	19	0	0	-6.68672	11.1088
1	-2.76857	R-HSA-422475	M1	1	0	Reactome Gene Sets	6	Axon guidance	-2.76857	1.88026	3.35358	24155	553	604	26	4.30464	0.825839	1956|2044|2048|2596|3320|3673|5578|5701|5708|5718|7074|7846|9353|10197|10298|10371|10376|10381|10383|10552|24137|55816|59277|84790|116832|284217	EGFR|EPHA5|EPHB2|GAP43|HSP90AA1|ITGA2|PRKCA|PSMC2|PSMD2|PSMD12|TIAM1|TUBA1A|SLIT2|PSME3|PAK4|SEMA3A|TUBA1B|TUBB3|TUBB4B|ARPC1A|KIF4A|DOK5|NTN4|TUBA1C|RPL39L|LAMA1	-1.31967	0	19	0	0	-6.68672	11.1088
1	-2.71921	R-HSA-190861	M1	1	0	Reactome Gene Sets	6	Gap junction assembly	-2.71921	5.55441	4.37937	24155	36	604	5	0.827815	0.368674	7846|10376|10381|10383|84790	TUBA1A|TUBA1B|TUBB3|TUBB4B|TUBA1C	-1.27872	0	19	0	0	-6.68672	11.1088
1	-2.66835	R-HSA-5610787	M1	1	0	Reactome Gene Sets	6	Hedgehog 'off' state	-2.66835	3.18518	3.72863	24155	113	604	9	1.49007	0.492974	5701|5708|5718|7846|10197|10376|10381|10383|84790	PSMC2|PSMD2|PSMD12|TUBA1A|PSME3|TUBA1B|TUBB3|TUBB4B|TUBA1C	-1.23899	0	19	0	0	-6.68672	11.1088
1	-2.65279	R-HSA-5620924	M1	1	0	Reactome Gene Sets	6	Intraflagellar transport	-2.65279	4.44352	4.05687	24155	54	604	6	0.993377	0.403525	7846|10376|10381|10383|84790|89891	TUBA1A|TUBA1B|TUBB3|TUBB4B|TUBA1C|WDR34	-1.23011	0	19	0	0	-6.68672	11.1088
1	-2.61173	R-HSA-3371497	M1	1	0	Reactome Gene Sets	6	HSP90 chaperone cycle for steroid hormone receptors (SHR)	-2.61173	4.36273	3.99828	24155	55	604	6	0.993377	0.403525	3320|7846|10376|10381|10383|84790	HSP90AA1|TUBA1A|TUBA1B|TUBB3|TUBB4B|TUBA1C	-1.20106	0	19	0	0	-6.68672	11.1088
1	-2.56198	R-HSA-8955332	M1	1	0	Reactome Gene Sets	6	Carboxyterminal post-translational modifications of tubulin	-2.56198	5.12714	4.13083	24155	39	604	5	0.827815	0.368674	7846|10376|10381|10383|84790	TUBA1A|TUBA1B|TUBB3|TUBB4B|TUBA1C	-1.15878	0	19	0	0	-6.68672	11.1088
1	-2.46526	R-HSA-9609736	M1	1	0	Reactome Gene Sets	6	Assembly and cell surface presentation of NMDA receptors	-2.46526	4.87704	3.97893	24155	41	604	5	0.827815	0.368674	7846|10376|10381|10383|84790	TUBA1A|TUBA1B|TUBB3|TUBB4B|TUBA1C	-1.08523	0	19	0	0	-6.68672	11.1088
1	-2.3811	R-HSA-438064	M1	1	0	Reactome Gene Sets	6	Post NMDA receptor activation events	-2.3811	3.45607	3.54583	24155	81	604	7	1.15894	0.435493	805|3084|7846|10376|10381|10383|84790	CALM2|NRG1|TUBA1A|TUBA1B|TUBB3|TUBB4B|TUBA1C	-1.02164	0	19	0	0	-6.68672	11.1088
1	-2.36104	R-HSA-5358351	M1	1	0	Reactome Gene Sets	6	Signaling by Hedgehog	-2.36104	2.68401	3.30207	24155	149	604	10	1.65563	0.519204	5701|5708|5718|7846|10197|10376|10381|10383|55733|84790	PSMC2|PSMD2|PSMD12|TUBA1A|PSME3|TUBA1B|TUBB3|TUBB4B|HHAT|TUBA1C	-1.00721	0	19	0	0	-6.68672	11.1088
1	-2.30808	R-HSA-389957	M1	1	0	Reactome Gene Sets	6	Prefoldin mediated transfer of substrate to CCT/TriC	-2.30808	5.7131	3.99616	24155	28	604	4	0.662252	0.330028	7846|10381|10383|84790	TUBA1A|TUBB3|TUBB4B|TUBA1C	-0.966886	0	19	0	0	-6.68672	11.1088
1	-2.26939	R-HSA-1280218	M1	1	0	Reactome Gene Sets	6	Adaptive Immune System	-2.26939	1.63555	2.84714	24155	758	604	31	5.13245	0.897848	805|3832|5515|5701|5708|5718|5817|7064|7326|7534|7846|8915|9493|10112|10197|10376|10381|10383|10477|23643|24137|26091|26191|29127|55176|56992|57520|80380|84790|122769|127544	CALM2|KIF11|PPP2CA|PSMC2|PSMD2|PSMD12|PVR|THOP1|UBE2G1|YWHAZ|TUBA1A|BCL10|KIF23|KIF20A|PSME3|TUBA1B|TUBB3|TUBB4B|UBE2E3|LY96|KIF4A|HERC4|PTPN22|RACGAP1|SEC61A2|KIF15|HECW2|PDCD1LG2|TUBA1C|LRR1|RNF19B	-0.933211	0	19	0	0	-6.68672	11.1088
1	-2.20727	R-HSA-190828	M1	1	0	Reactome Gene Sets	6	Gap junction trafficking	-2.20727	4.25444	3.57645	24155	47	604	5	0.827815	0.368674	7846|10376|10381|10383|84790	TUBA1A|TUBA1B|TUBB3|TUBB4B|TUBA1C	-0.891033	0	19	0	0	-6.68672	11.1088
1	-2.13041	R-HSA-157858	M1	1	0	Reactome Gene Sets	6	Gap junction trafficking and regulation	-2.13041	4.08079	3.45705	24155	49	604	5	0.827815	0.368674	7846|10376|10381|10383|84790	TUBA1A|TUBA1B|TUBB3|TUBB4B|TUBA1C	-0.836945	0	19	0	0	-6.68672	11.1088
1	-2.05635	R-HSA-442755	M1	1	0	Reactome Gene Sets	6	Activation of NMDA receptors and postsynaptic events	-2.05635	3.01013	3.11034	24155	93	604	7	1.15894	0.435493	805|3084|7846|10376|10381|10383|84790	CALM2|NRG1|TUBA1A|TUBA1B|TUBB3|TUBB4B|TUBA1C	-0.775836	0	19	0	0	-6.68672	11.1088
1	-6.50081	GO:0000910	M1	1	0	GO Biological Processes	19	cytokinesis	-6.50081	4.20965	6.74534	24155	171	604	18	2.98013	0.691878	805|994|3925|9055|9493|9738|9928|10112|23636|24137|26586|29127|51203|54443|55165|80179|144455|201163	CALM2|CDC25B|STMN1|PRC1|KIF23|CCP110|KIF14|KIF20A|NUP62|KIF4A|CKAP2|RACGAP1|NUSAP1|ANLN|CEP55|MYO19|E2F7|FLCN	-4.55618	0	20	1	1	-6.50081	19.9959
1	-5.93296	GO:0051302	M1	1	0	GO Biological Processes	19	regulation of cell division	-5.93296	4.04678	6.34624	24155	168	604	17	2.81457	0.672958	805|994|2124|2247|7039|9055|9493|9738|9928|10112|23594|23636|29127|56034|80179|144455|201163	CALM2|CDC25B|EVI2B|FGF2|TGFA|PRC1|KIF23|CCP110|KIF14|KIF20A|ORC6|NUP62|RACGAP1|PDGFC|MYO19|E2F7|FLCN	-4.04517	0	20	0	0	-6.50081	19.9959
1	-5.65712	GO:0032465	M1	1	0	GO Biological Processes	19	regulation of cytokinesis	-5.65712	5.39214	6.6478	24155	89	604	12	1.98675	0.567801	805|994|9055|9493|9738|9928|10112|23636|29127|80179|144455|201163	CALM2|CDC25B|PRC1|KIF23|CCP110|KIF14|KIF20A|NUP62|RACGAP1|MYO19|E2F7|FLCN	-3.80645	0	20	0	0	-6.50081	19.9959
1	-4.87373	GO:0000281	M1	1	0	GO Biological Processes	19	mitotic cytokinesis	-4.87373	5.47832	6.13675	24155	73	604	10	1.65563	0.519204	3925|9493|10112|23636|24137|26586|29127|51203|54443|55165	STMN1|KIF23|KIF20A|NUP62|KIF4A|CKAP2|RACGAP1|NUSAP1|ANLN|CEP55	-3.10519	0	20	0	0	-6.50081	19.9959
1	-4.35525	GO:0000022	M1	1	0	GO Biological Processes	19	mitotic spindle elongation	-4.35525	17.7741	8.06021	24155	9	604	4	0.662252	0.330028	9055|9493|24137|29127	PRC1|KIF23|KIF4A|RACGAP1	-2.64409	0	20	0	0	-6.50081	19.9959
1	-4.14208	GO:0051231	M1	1	0	GO Biological Processes	19	spindle elongation	-4.14208	15.9967	7.59609	24155	10	604	4	0.662252	0.330028	9055|9493|24137|29127	PRC1|KIF23|KIF4A|RACGAP1	-2.46002	0	20	0	0	-6.50081	19.9959
1	-3.69031	GO:0061640	M1	1	0	GO Biological Processes	19	cytoskeleton-dependent cytokinesis	-3.69031	3.99917	4.8129	24155	100	604	10	1.65563	0.519204	3925|9493|10112|23636|24137|26586|29127|51203|54443|55165	STMN1|KIF23|KIF20A|NUP62|KIF4A|CKAP2|RACGAP1|NUSAP1|ANLN|CEP55	-2.07261	0	20	0	0	-6.50081	19.9959
1	-3.5315	GO:0000912	M1	1	0	GO Biological Processes	19	assembly of actomyosin apparatus involved in cytokinesis	-3.5315	19.9959	7.45235	24155	6	604	3	0.496689	0.28605	9493|29127|54443	KIF23|RACGAP1|ANLN	-1.94555	0	20	0	0	-6.50081	19.9959
1	-3.5315	GO:0000915	M1	1	0	GO Biological Processes	19	actomyosin contractile ring assembly	-3.5315	19.9959	7.45235	24155	6	604	3	0.496689	0.28605	9493|29127|54443	KIF23|RACGAP1|ANLN	-1.94555	0	20	0	0	-6.50081	19.9959
1	-3.41411	GO:0032506	M1	1	0	GO Biological Processes	19	cytokinetic process	-3.41411	6.15257	5.15718	24155	39	604	6	0.993377	0.403525	9493|10112|23636|29127|54443|55165	KIF23|KIF20A|NUP62|RACGAP1|ANLN|CEP55	-1.8432	0	20	0	0	-6.50081	19.9959
1	-3.29661	GO:0044837	M1	1	0	GO Biological Processes	19	actomyosin contractile ring organization	-3.29661	17.1393	6.83914	24155	7	604	3	0.496689	0.28605	9493|29127|54443	KIF23|RACGAP1|ANLN	-1.74325	0	20	0	0	-6.50081	19.9959
1	-3.29661	GO:0051256	M1	1	0	GO Biological Processes	19	mitotic spindle midzone assembly	-3.29661	17.1393	6.83914	24155	7	604	3	0.496689	0.28605	9493|24137|29127	KIF23|KIF4A|RACGAP1	-1.74325	0	20	0	0	-6.50081	19.9959
1	-2.82175	GO:0051781	M1	1	0	GO Biological Processes	19	positive regulation of cell division	-2.82175	3.6774	4.00646	24155	87	604	8	1.3245	0.465171	994|2247|7039|9493|9928|23636|29127|56034	CDC25B|FGF2|TGFA|KIF23|KIF14|NUP62|RACGAP1|PDGFC	-1.36275	0	20	0	0	-6.50081	19.9959
1	-2.78589	GO:0051255	M1	1	0	GO Biological Processes	19	spindle midzone assembly	-2.78589	11.9975	5.57044	24155	10	604	3	0.496689	0.28605	9493|24137|29127	KIF23|KIF4A|RACGAP1	-1.33286	0	20	0	0	-6.50081	19.9959
1	-2.51286	GO:0032467	M1	1	0	GO Biological Processes	19	positive regulation of cytokinesis	-2.51286	4.99897	4.05361	24155	40	604	5	0.827815	0.368674	994|9493|9928|23636|29127	CDC25B|KIF23|KIF14|NUP62|RACGAP1	-1.12238	0	20	0	0	-6.50081	19.9959
1	-6.15944	M242	M1	1	0	Canonical Pathways	11	PID AURORA A PATHWAY	-6.15944	10.3204	8.31574	24155	31	604	8	1.3245	0.465171	332|672|994|9787|9793|10460|22974|64506	BIRC5|BRCA1|CDC25B|DLGAP5|CKAP5|TACC3|TPX2|CPEB1	-4.25183	0	21	1	1	-6.15944	10.3204
1	-6.13216	GO:1903311	M1	1	0	GO Biological Processes	19	regulation of mRNA metabolic process	-6.13216	3.08578	6.05311	24155	324	604	25	4.13907	0.810502	891|3178|3181|3184|4670|5317|5393|5578|5701|5708|5718|6426|6427|7534|8683|10197|10262|10492|10643|10657|11340|26528|64506|79882|118460	CCNB1|HNRNPA1|HNRNPA2B1|HNRNPD|HNRNPM|PKP1|EXOSC9|PRKCA|PSMC2|PSMD2|PSMD12|SRSF1|SRSF2|YWHAZ|SRSF9|PSME3|SF3B4|SYNCRIP|IGF2BP3|KHDRBS1|EXOSC8|DAZAP1|CPEB1|ZC3H14|EXOSC6	-4.22895	0	22	1	1	-6.13216	4.54451
1	-4.66067	GO:0034655	M1	1	0	GO Biological Processes	19	nucleobase-containing compound catabolic process	-4.66067	2.14679	4.75397	24155	652	604	35	5.7947	0.950681	2237|3184|3569|3692|4670|4860|4907|4927|5209|5315|5317|5393|5515|5578|5701|5708|5718|7534|9125|9582|9631|10197|10492|10535|10643|10762|11340|23165|23511|23636|55706|57089|79882|118460|252969	FEN1|HNRNPD|IL6|EIF6|HNRNPM|PNP|NT5E|NUP88|PFKFB3|PKM|PKP1|EXOSC9|PPP2CA|PRKCA|PSMC2|PSMD2|PSMD12|YWHAZ|CNOT9|APOBEC3B|NUP155|PSME3|SYNCRIP|RNASEH2A|IGF2BP3|NUP50|EXOSC8|NUP205|NUP188|NUP62|NDC1|ENTPD7|ZC3H14|EXOSC6|NEIL2	-2.92177	0	22	0	0	-6.13216	4.54451
1	-4.3115	GO:0044270	M1	1	0	GO Biological Processes	19	cellular nitrogen compound catabolic process	-4.3115	2.03924	4.48811	24155	706	604	36	5.96026	0.963319	1577|2237|3184|3569|3692|4670|4860|4907|4927|5209|5315|5317|5393|5515|5578|5701|5708|5718|7534|9125|9582|9631|10197|10492|10535|10643|10762|11340|23165|23511|23636|55706|57089|79882|118460|252969	CYP3A5|FEN1|HNRNPD|IL6|EIF6|HNRNPM|PNP|NT5E|NUP88|PFKFB3|PKM|PKP1|EXOSC9|PPP2CA|PRKCA|PSMC2|PSMD2|PSMD12|YWHAZ|CNOT9|APOBEC3B|NUP155|PSME3|SYNCRIP|RNASEH2A|IGF2BP3|NUP50|EXOSC8|NUP205|NUP188|NUP62|NDC1|ENTPD7|ZC3H14|EXOSC6|NEIL2	-2.60674	0	22	0	0	-6.13216	4.54451
1	-4.15802	R-HSA-450531	M1	1	0	Reactome Gene Sets	6	Regulation of mRNA stability by proteins that bind AU-rich elements	-4.15802	4.54451	5.33452	24155	88	604	10	1.65563	0.519204	3184|5393|5578|5701|5708|5718|7534|10197|11340|118460	HNRNPD|EXOSC9|PRKCA|PSMC2|PSMD2|PSMD12|YWHAZ|PSME3|EXOSC8|EXOSC6	-2.47395	0	22	0	0	-6.13216	4.54451
1	-3.97932	GO:0046700	M1	1	0	GO Biological Processes	19	heterocycle catabolic process	-3.97932	1.9854	4.25252	24155	705	604	35	5.7947	0.950681	2237|3184|3569|3692|4670|4860|4907|4927|5209|5315|5317|5393|5515|5578|5701|5708|5718|7534|9125|9582|9631|10197|10492|10535|10643|10762|11340|23165|23511|23636|55706|57089|79882|118460|252969	FEN1|HNRNPD|IL6|EIF6|HNRNPM|PNP|NT5E|NUP88|PFKFB3|PKM|PKP1|EXOSC9|PPP2CA|PRKCA|PSMC2|PSMD2|PSMD12|YWHAZ|CNOT9|APOBEC3B|NUP155|PSME3|SYNCRIP|RNASEH2A|IGF2BP3|NUP50|EXOSC8|NUP205|NUP188|NUP62|NDC1|ENTPD7|ZC3H14|EXOSC6|NEIL2	-2.31788	0	22	0	0	-6.13216	4.54451
1	-3.83807	GO:0019439	M1	1	0	GO Biological Processes	19	aromatic compound catabolic process	-3.83807	1.95218	4.145	24155	717	604	35	5.7947	0.950681	2237|3184|3569|3692|4670|4860|4907|4927|5209|5315|5317|5393|5515|5578|5701|5708|5718|7534|9125|9582|9631|10197|10492|10535|10643|10762|11340|23165|23511|23636|55706|57089|79882|118460|252969	FEN1|HNRNPD|IL6|EIF6|HNRNPM|PNP|NT5E|NUP88|PFKFB3|PKM|PKP1|EXOSC9|PPP2CA|PRKCA|PSMC2|PSMD2|PSMD12|YWHAZ|CNOT9|APOBEC3B|NUP155|PSME3|SYNCRIP|RNASEH2A|IGF2BP3|NUP50|EXOSC8|NUP205|NUP188|NUP62|NDC1|ENTPD7|ZC3H14|EXOSC6|NEIL2	-2.19129	0	22	0	0	-6.13216	4.54451
1	-3.81216	GO:0043488	M1	1	0	GO Biological Processes	19	regulation of mRNA stability	-3.81216	3.16319	4.62575	24155	177	604	14	2.31788	0.612258	3184|4670|5393|5578|5701|5708|5718|7534|10197|10492|10643|11340|79882|118460	HNRNPD|HNRNPM|EXOSC9|PRKCA|PSMC2|PSMD2|PSMD12|YWHAZ|PSME3|SYNCRIP|IGF2BP3|EXOSC8|ZC3H14|EXOSC6	-2.17223	0	22	0	0	-6.13216	4.54451
1	-3.80956	GO:0061013	M1	1	0	GO Biological Processes	19	regulation of mRNA catabolic process	-3.80956	3.01445	4.56967	24155	199	604	15	2.48344	0.63321	3184|4670|5317|5393|5578|5701|5708|5718|7534|10197|10492|10643|11340|79882|118460	HNRNPD|HNRNPM|PKP1|EXOSC9|PRKCA|PSMC2|PSMD2|PSMD12|YWHAZ|PSME3|SYNCRIP|IGF2BP3|EXOSC8|ZC3H14|EXOSC6	-2.1719	0	22	0	0	-6.13216	4.54451
1	-3.66094	GO:0043487	M1	1	0	GO Biological Processes	19	regulation of RNA stability	-3.66094	3.05948	4.47856	24155	183	604	14	2.31788	0.612258	3184|4670|5393|5578|5701|5708|5718|7534|10197|10492|10643|11340|79882|118460	HNRNPD|HNRNPM|EXOSC9|PRKCA|PSMC2|PSMD2|PSMD12|YWHAZ|PSME3|SYNCRIP|IGF2BP3|EXOSC8|ZC3H14|EXOSC6	-2.04755	0	22	0	0	-6.13216	4.54451
1	-3.41942	GO:1901361	M1	1	0	GO Biological Processes	19	organic cyclic compound catabolic process	-3.41942	1.85392	3.81761	24155	755	604	35	5.7947	0.950681	2237|3184|3569|3692|4670|4860|4907|4927|5209|5315|5317|5393|5515|5578|5701|5708|5718|7534|9125|9582|9631|10197|10492|10535|10643|10762|11340|23165|23511|23636|55706|57089|79882|118460|252969	FEN1|HNRNPD|IL6|EIF6|HNRNPM|PNP|NT5E|NUP88|PFKFB3|PKM|PKP1|EXOSC9|PPP2CA|PRKCA|PSMC2|PSMD2|PSMD12|YWHAZ|CNOT9|APOBEC3B|NUP155|PSME3|SYNCRIP|RNASEH2A|IGF2BP3|NUP50|EXOSC8|NUP205|NUP188|NUP62|NDC1|ENTPD7|ZC3H14|EXOSC6|NEIL2	-1.84695	0	22	0	0	-6.13216	4.54451
1	-2.21646	GO:0006401	M1	1	0	GO Biological Processes	19	RNA catabolic process	-2.21646	1.89961	2.90545	24155	400	604	19	3.1457	0.710231	2237|3184|4670|5317|5393|5515|5578|5701|5708|5718|7534|9125|10197|10492|10535|10643|11340|79882|118460	FEN1|HNRNPD|HNRNPM|PKP1|EXOSC9|PPP2CA|PRKCA|PSMC2|PSMD2|PSMD12|YWHAZ|CNOT9|PSME3|SYNCRIP|RNASEH2A|IGF2BP3|EXOSC8|ZC3H14|EXOSC6	-0.894995	0	22	0	0	-6.13216	4.54451
1	-5.77378	GO:0051056	M1	1	0	GO Biological Processes	19	regulation of small GTPase mediated signal transduction	-5.77378	2.94924	5.78815	24155	339	604	25	4.13907	0.810502	2048|2057|2150|2305|3084|3925|5880|7074|9289|9353|9754|9912|9928|10253|10276|10982|23636|29127|55114|57493|57580|57706|117178|154796|201163	EPHB2|EPOR|F2RL1|FOXM1|NRG1|STMN1|RAC2|TIAM1|ADGRG1|SLIT2|STARD8|ARHGAP44|KIF14|SPRY2|NET1|MAPRE2|NUP62|RACGAP1|ARHGAP17|HEG1|PREX1|DENND1A|SSX2IP|AMOT|FLCN	-3.89872	0	23	1	1	-5.77378	5.5161
1	-4.9913	GO:0046578	M1	1	0	GO Biological Processes	19	regulation of Ras protein signal transduction	-4.9913	3.17926	5.42215	24155	239	604	19	3.1457	0.710231	2048|2057|2150|2305|3084|3925|7074|9289|9912|9928|10253|10276|10982|23636|57493|57580|57706|117178|201163	EPHB2|EPOR|F2RL1|FOXM1|NRG1|STMN1|TIAM1|ADGRG1|ARHGAP44|KIF14|SPRY2|NET1|MAPRE2|NUP62|HEG1|PREX1|DENND1A|SSX2IP|FLCN	-3.21283	0	23	0	0	-5.77378	5.5161
1	-4.0315	GO:0051058	M1	1	0	GO Biological Processes	19	negative regulation of small GTPase mediated signal transduction	-4.0315	5.5161	5.51448	24155	58	604	8	1.3245	0.465171	2048|3925|9353|9912|10253|23636|57493|201163	EPHB2|STMN1|SLIT2|ARHGAP44|SPRY2|NUP62|HEG1|FLCN	-2.36524	0	23	0	0	-5.77378	5.5161
1	-3.89981	GO:0007264	M1	1	0	GO Biological Processes	19	small GTPase mediated signal transduction	-3.89981	2.09747	4.25401	24155	572	604	30	4.96689	0.884018	1786|1794|2048|2057|2150|2247|2305|3084|3925|5880|7074|9289|9353|9754|9912|9928|10253|10276|10971|10982|23636|29127|55114|55619|57493|57580|57706|117178|154796|201163	DNMT1|DOCK2|EPHB2|EPOR|F2RL1|FGF2|FOXM1|NRG1|STMN1|RAC2|TIAM1|ADGRG1|SLIT2|STARD8|ARHGAP44|KIF14|SPRY2|NET1|YWHAQ|MAPRE2|NUP62|RACGAP1|ARHGAP17|DOCK10|HEG1|PREX1|DENND1A|SSX2IP|AMOT|FLCN	-2.24785	0	23	0	0	-5.77378	5.5161
1	-3.52638	GO:0046580	M1	1	0	GO Biological Processes	19	negative regulation of Ras protein signal transduction	-3.52638	5.3835	5.06752	24155	52	604	7	1.15894	0.435493	2048|3925|9912|10253|23636|57493|201163	EPHB2|STMN1|ARHGAP44|SPRY2|NUP62|HEG1|FLCN	-1.94315	0	23	0	0	-5.77378	5.5161
1	-2.88911	GO:0001933	M1	1	0	GO Biological Processes	19	negative regulation of protein phosphorylation	-2.88911	2.05086	3.51697	24155	429	604	22	3.64238	0.762285	805|891|2022|2048|2150|2305|3082|3976|5515|5569|9052|9353|9555|10253|11116|23636|25937|26191|26585|55872|57493|201163	CALM2|CCNB1|ENG|EPHB2|F2RL1|FOXM1|HGF|LIF|PPP2CA|PKIA|GPRC5A|SLIT2|MACROH2A1|SPRY2|FGFR1OP|NUP62|WWTR1|PTPN22|GREM1|PBK|HEG1|FLCN	-1.41605	0	23	0	0	-5.77378	5.5161
1	-2.64287	GO:0007265	M1	1	0	GO Biological Processes	19	Ras protein signal transduction	-2.64287	1.95951	3.28662	24155	449	604	22	3.64238	0.762285	1786|2048|2057|2150|2247|2305|3084|3925|5880|7074|9289|9912|9928|10253|10276|10982|23636|57493|57580|57706|117178|201163	DNMT1|EPHB2|EPOR|F2RL1|FGF2|FOXM1|NRG1|STMN1|RAC2|TIAM1|ADGRG1|ARHGAP44|KIF14|SPRY2|NET1|MAPRE2|NUP62|HEG1|PREX1|DENND1A|SSX2IP|FLCN	-1.22222	0	23	0	0	-5.77378	5.5161
1	-2.42712	GO:0042326	M1	1	0	GO Biological Processes	19	negative regulation of phosphorylation	-2.42712	1.87995	3.07847	24155	468	604	22	3.64238	0.762285	805|891|2022|2048|2150|2305|3082|3976|5515|5569|9052|9353|9555|10253|11116|23636|25937|26191|26585|55872|57493|201163	CALM2|CCNB1|ENG|EPHB2|F2RL1|FOXM1|HGF|LIF|PPP2CA|PKIA|GPRC5A|SLIT2|MACROH2A1|SPRY2|FGFR1OP|NUP62|WWTR1|PTPN22|GREM1|PBK|HEG1|FLCN	-1.05986	0	23	0	0	-5.77378	5.5161
1	-2.14841	GO:0045936	M1	1	0	GO Biological Processes	19	negative regulation of phosphate metabolic process	-2.14841	1.70613	2.77123	24155	586	604	25	4.13907	0.810502	805|891|2022|2048|2150|2305|3082|3976|5515|5569|9052|9088|9353|9555|10253|11116|23636|25937|26191|26585|55872|57493|57709|63898|201163	CALM2|CCNB1|ENG|EPHB2|F2RL1|FOXM1|HGF|LIF|PPP2CA|PKIA|GPRC5A|PKMYT1|SLIT2|MACROH2A1|SPRY2|FGFR1OP|NUP62|WWTR1|PTPN22|GREM1|PBK|HEG1|SLC7A14|SH2D4A|FLCN	-0.848638	0	23	0	0	-5.77378	5.5161
1	-2.1395	GO:0010563	M1	1	0	GO Biological Processes	19	negative regulation of phosphorus metabolic process	-2.1395	1.70322	2.76223	24155	587	604	25	4.13907	0.810502	805|891|2022|2048|2150|2305|3082|3976|5515|5569|9052|9088|9353|9555|10253|11116|23636|25937|26191|26585|55872|57493|57709|63898|201163	CALM2|CCNB1|ENG|EPHB2|F2RL1|FOXM1|HGF|LIF|PPP2CA|PKIA|GPRC5A|PKMYT1|SLIT2|MACROH2A1|SPRY2|FGFR1OP|NUP62|WWTR1|PTPN22|GREM1|PBK|HEG1|SLC7A14|SH2D4A|FLCN	-0.841907	0	23	0	0	-5.77378	5.5161
1	-2.04441	GO:1902532	M1	1	0	GO Biological Processes	19	negative regulation of intracellular signal transduction	-2.04441	1.69277	2.67328	24155	567	604	24	3.97351	0.794812	805|960|1827|2048|2150|2305|3925|3976|5329|5515|5743|8444|9353|9454|9912|10253|23636|26191|27429|55872|57493|83596|114548|201163	CALM2|CD44|RCAN1|EPHB2|F2RL1|FOXM1|STMN1|LIF|PLAUR|PPP2CA|PTGS2|DYRK3|SLIT2|HOMER3|ARHGAP44|SPRY2|NUP62|PTPN22|HTRA2|PBK|HEG1|BCL2L12|NLRP3|FLCN	-0.765883	0	23	0	0	-5.77378	5.5161
1	-5.71718	R-HSA-69273	M1	1	0	Reactome Gene Sets	6	Cyclin A/B1/B2 associated events during G2/M transition	-5.71718	11.1977	8.16961	24155	25	604	7	1.15894	0.435493	891|993|994|2305|5515|9088|28227	CCNB1|CDC25A|CDC25B|FOXM1|PPP2CA|PKMYT1|PPP2R3B	-3.86054	0	24	1	1	-5.71718	12.4974
1	-5.25659	M176	M1	1	0	Canonical Pathways	11	PID FOXM1 PATHWAY	-5.25659	7.99834	7.09398	24155	40	604	8	1.3245	0.465171	332|891|994|1063|1163|2119|2305|7039	BIRC5|CCNB1|CDC25B|CENPF|CKS1B|ETV5|FOXM1|TGFA	-3.44148	0	24	0	0	-5.71718	12.4974
1	-4.47608	R-HSA-156711	M1	1	0	Reactome Gene Sets	6	Polo-like kinase mediated events	-4.47608	12.4974	7.36731	24155	16	604	5	0.827815	0.368674	891|993|1063|2305|9088	CCNB1|CDC25A|CENPF|FOXM1|PKMYT1	-2.75514	0	24	0	0	-5.71718	12.4974
1	-3.48337	GO:1901989	M1	1	0	GO Biological Processes	19	positive regulation of cell cycle phase transition	-3.48337	3.7728	4.58176	24155	106	604	10	1.65563	0.519204	891|993|994|1956|2146|8318|8444|9787|51514|79447	CCNB1|CDC25A|CDC25B|EGFR|EZH2|CDC45|DYRK3|DLGAP5|DTL|PAGR1	-1.90382	0	24	0	0	-5.71718	12.4974
1	-3.0882	GO:1902751	M1	1	0	GO Biological Processes	19	positive regulation of cell cycle G2/M phase transition	-3.0882	6.66529	4.9723	24155	30	604	5	0.827815	0.368674	891|993|994|8444|51514	CCNB1|CDC25A|CDC25B|DYRK3|DTL	-1.57954	0	24	0	0	-5.71718	12.4974
1	-2.36648	GO:0010971	M1	1	0	GO Biological Processes	19	positive regulation of G2/M transition of mitotic cell cycle	-2.36648	5.9247	4.10024	24155	27	604	4	0.662252	0.330028	891|993|994|51514	CCNB1|CDC25A|CDC25B|DTL	-1.01083	0	24	0	0	-5.71718	12.4974
1	-2.10632	GO:1901992	M1	1	0	GO Biological Processes	19	positive regulation of mitotic cell cycle phase transition	-2.10632	3.07629	3.17784	24155	91	604	7	1.15894	0.435493	891|993|994|1956|8318|9787|51514	CCNB1|CDC25A|CDC25B|EGFR|CDC45|DLGAP5|DTL	-0.814906	0	24	0	0	-5.71718	12.4974
1	-5.51134	GO:0007098	M1	1	0	GO Biological Processes	19	centrosome cycle	-5.51134	4.47907	6.24525	24155	125	604	14	2.31788	0.612258	672|3832|5902|9738|9768|9793|10733|22995|23636|25914|93323|117178|151648|284403	BRCA1|KIF11|RANBP1|CCP110|PCLAF|CKAP5|PLK4|CEP152|NUP62|RTTN|HAUS8|SSX2IP|SGO1|WDR62	-3.67092	0	25	1	1	-5.51134	7.3669
1	-5.15508	GO:0031023	M1	1	0	GO Biological Processes	19	microtubule organizing center organization	-5.15508	4.17824	5.90815	24155	134	604	14	2.31788	0.612258	672|3832|5902|9738|9768|9793|10733|22995|23636|25914|93323|117178|151648|284403	BRCA1|KIF11|RANBP1|CCP110|PCLAF|CKAP5|PLK4|CEP152|NUP62|RTTN|HAUS8|SSX2IP|SGO1|WDR62	-3.35464	0	25	0	0	-5.51134	7.3669
1	-4.42047	GO:0007099	M1	1	0	GO Biological Processes	19	centriole replication	-4.42047	7.3669	6.29023	24155	38	604	7	1.15894	0.435493	672|9738|10733|22995|23636|25914|284403	BRCA1|CCP110|PLK4|CEP152|NUP62|RTTN|WDR62	-2.7039	0	25	0	0	-5.51134	7.3669
1	-4.19789	GO:0098534	M1	1	0	GO Biological Processes	19	centriole assembly	-4.19789	6.82785	5.98101	24155	41	604	7	1.15894	0.435493	672|9738|10733|22995|23636|25914|284403	BRCA1|CCP110|PLK4|CEP152|NUP62|RTTN|WDR62	-2.50771	0	25	0	0	-5.51134	7.3669
1	-3.54021	GO:0051298	M1	1	0	GO Biological Processes	19	centrosome duplication	-3.54021	4.70491	4.89947	24155	68	604	8	1.3245	0.465171	672|9738|9793|10733|22995|23636|25914|284403	BRCA1|CCP110|CKAP5|PLK4|CEP152|NUP62|RTTN|WDR62	-1.94694	0	25	0	0	-5.51134	7.3669
1	-5.46269	GO:0010638	M1	1	0	GO Biological Processes	19	positive regulation of organelle organization	-5.46269	2.30721	5.29819	24155	624	604	36	5.96026	0.963319	274|672|891|1786|2150|2237|3178|3181|3184|3976|4000|4602|5329|5880|5902|6382|7027|7039|7534|9555|9738|9787|10458|10552|10615|10733|10763|10962|10971|23636|26097|27429|51203|51750|55329|140609	BIN1|BRCA1|CCNB1|DNMT1|F2RL1|FEN1|HNRNPA1|HNRNPA2B1|HNRNPD|LIF|LMNA|MYB|PLAUR|RAC2|RANBP1|SDC1|TFDP1|TGFA|YWHAZ|MACROH2A1|CCP110|DLGAP5|BAIAP2|ARPC1A|SPAG5|PLK4|NES|MLLT11|YWHAQ|NUP62|CHTOP|HTRA2|NUSAP1|RTEL1|MNS1|NEK7	-3.62516	0	26	1	1	-5.46269	2.30721
1	-5.45492	GO:0018205	M1	1	0	GO Biological Processes	19	peptidyl-lysine modification	-5.45492	2.69944	5.48867	24155	400	604	27	4.4702	0.840842	86|672|1725|1786|2146|3054|3976|4000|4015|4602|4927|6804|7052|7468|9063|9555|9631|10762|23165|23511|23512|23636|51200|55706|79447|84695|201163	ACTL6A|BRCA1|DHPS|DNMT1|EZH2|HCFC1|LIF|LMNA|LOX|MYB|NUP88|STX1A|TGM2|NSD2|PIAS2|MACROH2A1|NUP155|NUP50|NUP205|NUP188|SUZ12|NUP62|CPA4|NDC1|PAGR1|LOXL3|FLCN	-3.61882	0	27	1	1	-5.45492	10.9068
1	-4.471	GO:2001252	M1	1	0	GO Biological Processes	19	positive regulation of chromosome organization	-4.471	3.44756	5.18899	24155	174	604	15	2.48344	0.63321	672|891|1786|2237|3178|3181|3184|3976|4000|4602|9555|9787|26097|51750|140609	BRCA1|CCNB1|DNMT1|FEN1|HNRNPA1|HNRNPA2B1|HNRNPD|LIF|LMNA|MYB|MACROH2A1|DLGAP5|CHTOP|RTEL1|NEK7	-2.75116	0	27	0	0	-5.45492	10.9068
1	-3.11868	GO:0016571	M1	1	0	GO Biological Processes	19	histone methylation	-3.11868	3.16481	4.09907	24155	139	604	11	1.82119	0.544087	672|1786|2146|4000|4602|7468|9555|23512|26097|55352|79447	BRCA1|DNMT1|EZH2|LMNA|MYB|NSD2|MACROH2A1|SUZ12|CHTOP|COPRS|PAGR1	-1.59841	0	27	0	0	-5.45492	10.9068
1	-2.72285	GO:0006479	M1	1	0	GO Biological Processes	19	protein methylation	-2.72285	2.68101	3.61507	24155	179	604	12	1.98675	0.567801	672|1786|2146|4000|4602|7468|9555|23512|26097|55352|55471|79447	BRCA1|DNMT1|EZH2|LMNA|MYB|NSD2|MACROH2A1|SUZ12|CHTOP|COPRS|NDUFAF7|PAGR1	-1.28095	0	27	0	0	-5.45492	10.9068
1	-2.72285	GO:0008213	M1	1	0	GO Biological Processes	19	protein alkylation	-2.72285	2.68101	3.61507	24155	179	604	12	1.98675	0.567801	672|1786|2146|4000|4602|7468|9555|23512|26097|55352|55471|79447	BRCA1|DNMT1|EZH2|LMNA|MYB|NSD2|MACROH2A1|SUZ12|CHTOP|COPRS|NDUFAF7|PAGR1	-1.28095	0	27	0	0	-5.45492	10.9068
1	-2.6688	GO:0043414	M1	1	0	GO Biological Processes	19	macromolecule methylation	-2.6688	2.20019	3.4004	24155	309	604	17	2.81457	0.672958	672|1786|2146|4000|4602|7468|9555|10436|23512|26097|51106|54069|54888|55352|55471|57570|79447	BRCA1|DNMT1|EZH2|LMNA|MYB|NSD2|MACROH2A1|EMG1|SUZ12|CHTOP|TFB1M|MIS18A|NSUN2|COPRS|NDUFAF7|TRMT5|PAGR1	-1.23899	0	27	0	0	-5.45492	10.9068
1	-2.6557	GO:0051574	M1	1	0	GO Biological Processes	19	positive regulation of histone H3-K9 methylation	-2.6557	10.9068	5.26302	24155	11	604	3	0.496689	0.28605	672|4000|4602	BRCA1|LMNA|MYB	-1.23136	0	27	0	0	-5.45492	10.9068
1	-2.64944	GO:0016569	M1	1	0	GO Biological Processes	19	covalent chromatin modification	-2.64944	1.92832	3.27939	24155	477	604	23	3.80795	0.778747	86|672|891|1786|2146|3054|3070|3976|4000|4602|5578|7468|8091|9555|23512|26097|29128|51200|55352|79447|83903|84678|201163	ACTL6A|BRCA1|CCNB1|DNMT1|EZH2|HCFC1|HELLS|LIF|LMNA|MYB|PRKCA|NSD2|HMGA2|MACROH2A1|SUZ12|CHTOP|UHRF1|CPA4|COPRS|PAGR1|HASPIN|KDM2B|FLCN	-1.22733	0	27	0	0	-5.45492	10.9068
1	-2.64213	GO:0034968	M1	1	0	GO Biological Processes	19	histone lysine methylation	-2.64213	3.15724	3.69729	24155	114	604	9	1.49007	0.492974	672|1786|2146|4000|4602|7468|9555|23512|79447	BRCA1|DNMT1|EZH2|LMNA|MYB|NSD2|MACROH2A1|SUZ12|PAGR1	-1.22222	0	27	0	0	-5.45492	10.9068
1	-2.63026	GO:0032259	M1	1	0	GO Biological Processes	19	methylation	-2.63026	2.07607	3.32202	24155	366	604	19	3.1457	0.710231	672|1786|2146|4000|4602|7298|7468|9555|10436|23512|26097|51106|54069|54888|55352|55471|57570|64745|79447	BRCA1|DNMT1|EZH2|LMNA|MYB|TYMS|NSD2|MACROH2A1|EMG1|SUZ12|CHTOP|TFB1M|MIS18A|NSUN2|COPRS|NDUFAF7|TRMT5|METTL17|PAGR1	-1.21431	0	27	0	0	-5.45492	10.9068
1	-2.6293	GO:0051570	M1	1	0	GO Biological Processes	19	regulation of histone H3-K9 methylation	-2.6293	6.95508	4.57576	24155	23	604	4	0.662252	0.330028	672|1786|4000|4602	BRCA1|DNMT1|LMNA|MYB	-1.21431	0	27	0	0	-5.45492	10.9068
1	-2.56198	GO:0031062	M1	1	0	GO Biological Processes	19	positive regulation of histone methylation	-2.56198	5.12714	4.13083	24155	39	604	5	0.827815	0.368674	672|1786|4000|4602|26097	BRCA1|DNMT1|LMNA|MYB|CHTOP	-1.15878	0	27	0	0	-5.45492	10.9068
1	-2.54996	GO:0016570	M1	1	0	GO Biological Processes	19	histone modification	-2.54996	1.9252	3.19777	24155	457	604	22	3.64238	0.762285	86|672|891|1786|2146|3054|3976|4000|4602|5578|7468|8091|9555|23512|26097|29128|51200|55352|79447|83903|84678|201163	ACTL6A|BRCA1|CCNB1|DNMT1|EZH2|HCFC1|LIF|LMNA|MYB|PRKCA|NSD2|HMGA2|MACROH2A1|SUZ12|CHTOP|UHRF1|CPA4|COPRS|PAGR1|HASPIN|KDM2B|FLCN	-1.15045	0	27	0	0	-5.45492	10.9068
1	-2.54646	GO:1902275	M1	1	0	GO Biological Processes	19	regulation of chromatin organization	-2.54646	2.55266	3.42261	24155	188	604	12	1.98675	0.567801	672|891|1786|3159|3976|4000|4288|4602|8318|9555|26097|201163	BRCA1|CCNB1|DNMT1|HMGA1|LIF|LMNA|MKI67|MYB|CDC45|MACROH2A1|CHTOP|FLCN	-1.14747	0	27	0	0	-5.45492	10.9068
1	-2.36648	GO:0051569	M1	1	0	GO Biological Processes	19	regulation of histone H3-K4 methylation	-2.36648	5.9247	4.10024	24155	27	604	4	0.662252	0.330028	672|1786|4602|9555	BRCA1|DNMT1|MYB|MACROH2A1	-1.01083	0	27	0	0	-5.45492	10.9068
1	-2.28429	GO:0018022	M1	1	0	GO Biological Processes	19	peptidyl-lysine methylation	-2.28429	2.79012	3.26471	24155	129	604	9	1.49007	0.492974	672|1786|2146|4000|4602|7468|9555|23512|79447	BRCA1|DNMT1|EZH2|LMNA|MYB|NSD2|MACROH2A1|SUZ12|PAGR1	-0.945391	0	27	0	0	-5.45492	10.9068
1	-2.24781	GO:0031060	M1	1	0	GO Biological Processes	19	regulation of histone methylation	-2.24781	3.69154	3.47975	24155	65	604	6	0.993377	0.403525	672|1786|4000|4602|9555|26097	BRCA1|DNMT1|LMNA|MYB|MACROH2A1|CHTOP	-0.921632	0	27	0	0	-5.45492	10.9068
1	-2.16538	GO:0051571	M1	1	0	GO Biological Processes	19	positive regulation of histone H3-K4 methylation	-2.16538	7.49845	4.16407	24155	16	604	3	0.496689	0.28605	672|1786|4602	BRCA1|DNMT1|MYB	-0.861523	0	27	0	0	-5.45492	10.9068
1	-2.13189	GO:0031058	M1	1	0	GO Biological Processes	19	positive regulation of histone modification	-2.13189	3.11047	3.21229	24155	90	604	7	1.15894	0.435493	672|891|1786|3976|4000|4602|26097	BRCA1|CCNB1|DNMT1|LIF|LMNA|MYB|CHTOP	-0.836945	0	27	0	0	-5.45492	10.9068
1	-5.40658	GO:0019042	M1	1	0	GO Biological Processes	19	viral latency	-5.40658	18.1781	9.12587	24155	11	604	5	0.827815	0.368674	3054|3159|8815|11168|64710	HCFC1|HMGA1|BANF1|PSIP1|NUCKS1	-3.579	0	28	1	1	-5.40658	39.9917
1	-4.80802	R-HSA-175567	M1	1	0	Reactome Gene Sets	6	Integration of viral DNA into host genomic DNA	-4.80802	39.9917	10.816	24155	3	604	3	0.496689	0.28605	3159|8815|11168	HMGA1|BANF1|PSIP1	-3.0575	0	28	0	0	-5.40658	39.9917
1	-4.80802	R-HSA-177539	M1	1	0	Reactome Gene Sets	6	Autointegration results in viral DNA circles	-4.80802	39.9917	10.816	24155	3	604	3	0.496689	0.28605	3159|8815|11168	HMGA1|BANF1|PSIP1	-3.0575	0	28	0	0	-5.40658	39.9917
1	-4.79686	R-HSA-162594	M1	1	0	Reactome Gene Sets	6	Early Phase of HIV Life Cycle	-4.79686	14.2828	7.96128	24155	14	604	5	0.827815	0.368674	2237|3159|3978|8815|11168	FEN1|HMGA1|LIG1|BANF1|PSIP1	-3.04986	0	28	0	0	-5.40658	39.9917
1	-3.82437	R-HSA-180689	M1	1	0	Reactome Gene Sets	6	APOBEC3G mediated resistance to HIV-1 infection	-3.82437	23.995	8.2351	24155	5	604	3	0.496689	0.28605	3159|8815|11168	HMGA1|BANF1|PSIP1	-2.18169	0	28	0	0	-5.40658	39.9917
1	-3.29661	R-HSA-164843	M1	1	0	Reactome Gene Sets	6	2-LTR circle formation	-3.29661	17.1393	6.83914	24155	7	604	3	0.496689	0.28605	3159|8815|11168	HMGA1|BANF1|PSIP1	-1.74325	0	28	0	0	-5.40658	39.9917
1	-3.10064	GO:0075713	M1	1	0	GO Biological Processes	19	establishment of integrated proviral latency	-3.10064	14.9969	6.34094	24155	8	604	3	0.496689	0.28605	3159|8815|11168	HMGA1|BANF1|PSIP1	-1.58655	0	28	0	0	-5.40658	39.9917
1	-2.93267	GO:0019043	M1	1	0	GO Biological Processes	19	establishment of viral latency	-2.93267	13.3306	5.92503	24155	9	604	3	0.496689	0.28605	3159|8815|11168	HMGA1|BANF1|PSIP1	-1.45146	0	28	0	0	-5.40658	39.9917
1	-2.93267	R-HSA-162592	M1	1	0	Reactome Gene Sets	6	Integration of provirus	-2.93267	13.3306	5.92503	24155	9	604	3	0.496689	0.28605	3159|8815|11168	HMGA1|BANF1|PSIP1	-1.45146	0	28	0	0	-5.40658	39.9917
1	-5.15498	GO:0002009	M1	1	0	GO Biological Processes	19	morphogenesis of an epithelium	-5.15498	2.36988	5.15577	24155	540	604	32	5.29801	0.911418	960|1436|1839|1956|2022|2119|2247|3082|3516|3976|5701|5708|5718|6664|7052|7074|7477|8914|8915|9353|9645|10197|10253|10371|27086|54101|55366|59277|84678|89958|94234|284217	CD44|CSF1R|HBEGF|EGFR|ENG|ETV5|FGF2|HGF|RBPJ|LIF|PSMC2|PSMD2|PSMD12|SOX11|TGM2|TIAM1|WNT7B|TIMELESS|BCL10|SLIT2|MICAL2|PSME3|SPRY2|SEMA3A|FOXP1|RIPK4|LGR4|NTN4|KDM2B|SAPCD2|FOXQ1|LAMA1	-3.35464	0	29	1	1	-5.15498	2.66611
1	-5.10906	GO:0048729	M1	1	0	GO Biological Processes	19	tissue morphogenesis	-5.10906	2.19539	5.04069	24155	674	604	37	6.12583	0.975746	960|1436|1839|1956|2022|2119|2247|3082|3084|3516|3673|3976|4147|5701|5708|5718|6664|7052|7074|7477|8091|8914|8915|9353|9645|10197|10253|10371|27086|54101|55366|57493|59277|84678|89958|94234|284217	CD44|CSF1R|HBEGF|EGFR|ENG|ETV5|FGF2|HGF|NRG1|RBPJ|ITGA2|LIF|MATN2|PSMC2|PSMD2|PSMD12|SOX11|TGM2|TIAM1|WNT7B|HMGA2|TIMELESS|BCL10|SLIT2|MICAL2|PSME3|SPRY2|SEMA3A|FOXP1|RIPK4|LGR4|HEG1|NTN4|KDM2B|SAPCD2|FOXQ1|LAMA1	-3.31396	0	29	0	0	-5.15498	2.66611
1	-2.70259	GO:1905330	M1	1	0	GO Biological Processes	19	regulation of morphogenesis of an epithelium	-2.70259	2.66611	3.59311	24155	180	604	12	1.98675	0.567801	2119|3082|3976|5701|5708|5718|7074|10197|27086|55366|59277|89958	ETV5|HGF|LIF|PSMC2|PSMD2|PSMD12|TIAM1|PSME3|FOXP1|LGR4|NTN4|SAPCD2	-1.26415	0	29	0	0	-5.15498	2.66611
1	-2.30089	GO:2000027	M1	1	0	GO Biological Processes	19	regulation of animal organ morphogenesis	-2.30089	2.20427	3.08987	24155	254	604	14	2.31788	0.612258	2022|2119|3082|3516|3976|5701|5708|5718|7074|10197|26585|55366|59277|89958	ENG|ETV5|HGF|RBPJ|LIF|PSMC2|PSMD2|PSMD12|TIAM1|PSME3|GREM1|LGR4|NTN4|SAPCD2	-0.960615	0	29	0	0	-5.15498	2.66611
1	-5.14345	GO:0006935	M1	1	0	GO Biological Processes	19	chemotaxis	-5.14345	2.2321	5.07933	24155	645	604	36	5.96026	0.963319	627|1436|1794|1839|1880|2044|2048|2131|2150|2247|2596|3082|3084|3569|3673|4015|4147|5054|5329|5578|5818|5880|7074|8061|9353|10371|10381|10457|26585|27178|51192|55816|57580|59277|154796|284217	BDNF|CSF1R|DOCK2|HBEGF|GPR183|EPHA5|EPHB2|EXT1|F2RL1|FGF2|GAP43|HGF|NRG1|IL6|ITGA2|LOX|MATN2|SERPINE1|PLAUR|PRKCA|NECTIN1|RAC2|TIAM1|FOSL1|SLIT2|SEMA3A|TUBB3|GPNMB|GREM1|IL37|CKLF|DOK5|PREX1|NTN4|AMOT|LAMA1	-3.34573	0	30	1	1	-5.14345	2.59687
1	-5.11398	GO:0042330	M1	1	0	GO Biological Processes	19	taxis	-5.11398	2.2252	5.05893	24155	647	604	36	5.96026	0.963319	627|1436|1794|1839|1880|2044|2048|2131|2150|2247|2596|3082|3084|3569|3673|4015|4147|5054|5329|5578|5818|5880|7074|8061|9353|10371|10381|10457|26585|27178|51192|55816|57580|59277|154796|284217	BDNF|CSF1R|DOCK2|HBEGF|GPR183|EPHA5|EPHB2|EXT1|F2RL1|FGF2|GAP43|HGF|NRG1|IL6|ITGA2|LOX|MATN2|SERPINE1|PLAUR|PRKCA|NECTIN1|RAC2|TIAM1|FOSL1|SLIT2|SEMA3A|TUBB3|GPNMB|GREM1|IL37|CKLF|DOK5|PREX1|NTN4|AMOT|LAMA1	-3.31757	0	30	0	0	-5.14345	2.59687
1	-3.76918	GO:0048858	M1	1	0	GO Biological Processes	19	cell projection morphogenesis	-3.76918	1.98157	4.11372	24155	666	604	33	5.46358	0.92474	627|960|1382|1436|1956|2044|2048|2131|2596|2803|3320|3925|4147|5578|5818|5880|6446|7074|7477|9353|9912|10371|10381|10458|10763|23043|51330|55619|55816|57520|59277|65981|284217	BDNF|CD44|CRABP2|CSF1R|EGFR|EPHA5|EPHB2|EXT1|GAP43|GOLGA4|HSP90AA1|STMN1|MATN2|PRKCA|NECTIN1|RAC2|SGK1|TIAM1|WNT7B|SLIT2|ARHGAP44|SEMA3A|TUBB3|BAIAP2|NES|TNIK|TNFRSF12A|DOCK10|DOK5|HECW2|NTN4|CAPRIN2|LAMA1	-2.13917	0	30	0	0	-5.14345	2.59687
1	-3.54855	GO:0032990	M1	1	0	GO Biological Processes	19	cell part morphogenesis	-3.54855	1.92661	3.93997	24155	685	604	33	5.46358	0.92474	627|960|1382|1436|1956|2044|2048|2131|2596|2803|3320|3925|4147|5578|5818|5880|6446|7074|7477|9353|9912|10371|10381|10458|10763|23043|51330|55619|55816|57520|59277|65981|284217	BDNF|CD44|CRABP2|CSF1R|EGFR|EPHA5|EPHB2|EXT1|GAP43|GOLGA4|HSP90AA1|STMN1|MATN2|PRKCA|NECTIN1|RAC2|SGK1|TIAM1|WNT7B|SLIT2|ARHGAP44|SEMA3A|TUBB3|BAIAP2|NES|TNIK|TNFRSF12A|DOCK10|DOK5|HECW2|NTN4|CAPRIN2|LAMA1	-1.95117	0	30	0	0	-5.14345	2.59687
1	-3.4837	GO:0120039	M1	1	0	GO Biological Processes	19	plasma membrane bounded cell projection morphogenesis	-3.4837	1.93313	3.89863	24155	662	604	32	5.29801	0.911418	627|960|1382|1436|1956|2044|2048|2131|2596|2803|3320|3925|4147|5578|5818|5880|6446|7074|7477|9353|9912|10371|10381|10458|23043|51330|55619|55816|57520|59277|65981|284217	BDNF|CD44|CRABP2|CSF1R|EGFR|EPHA5|EPHB2|EXT1|GAP43|GOLGA4|HSP90AA1|STMN1|MATN2|PRKCA|NECTIN1|RAC2|SGK1|TIAM1|WNT7B|SLIT2|ARHGAP44|SEMA3A|TUBB3|BAIAP2|TNIK|TNFRSF12A|DOCK10|DOK5|HECW2|NTN4|CAPRIN2|LAMA1	-1.90382	0	30	0	0	-5.14345	2.59687
1	-3.31721	GO:0048812	M1	1	0	GO Biological Processes	19	neuron projection morphogenesis	-3.31721	1.91318	3.7736	24155	648	604	31	5.13245	0.897848	627|1382|1436|1956|2044|2048|2131|2596|2803|3320|3925|4147|5578|5818|5880|6446|7074|7477|9353|9912|10371|10381|10458|23043|51330|55619|55816|57520|59277|65981|284217	BDNF|CRABP2|CSF1R|EGFR|EPHA5|EPHB2|EXT1|GAP43|GOLGA4|HSP90AA1|STMN1|MATN2|PRKCA|NECTIN1|RAC2|SGK1|TIAM1|WNT7B|SLIT2|ARHGAP44|SEMA3A|TUBB3|BAIAP2|TNIK|TNFRSF12A|DOCK10|DOK5|HECW2|NTN4|CAPRIN2|LAMA1	-1.75783	0	30	0	0	-5.14345	2.59687
1	-3.07686	GO:0048667	M1	1	0	GO Biological Processes	19	cell morphogenesis involved in neuron differentiation	-3.07686	1.9207	3.60382	24155	583	604	28	4.63576	0.855529	627|1382|1436|2044|2048|2131|2596|2803|3320|3925|4147|5578|5818|5880|7074|9353|9912|10371|10381|10458|23043|51330|55619|55816|57520|59277|65981|284217	BDNF|CRABP2|CSF1R|EPHA5|EPHB2|EXT1|GAP43|GOLGA4|HSP90AA1|STMN1|MATN2|PRKCA|NECTIN1|RAC2|TIAM1|SLIT2|ARHGAP44|SEMA3A|TUBB3|BAIAP2|TNIK|TNFRSF12A|DOCK10|DOK5|HECW2|NTN4|CAPRIN2|LAMA1	-1.56963	0	30	0	0	-5.14345	2.59687
1	-2.88259	GO:0061564	M1	1	0	GO Biological Processes	19	axon development	-2.88259	1.94512	3.46853	24155	514	604	25	4.13907	0.810502	627|1382|1436|1719|2044|2048|2131|2596|2803|3320|3925|4147|5578|5792|5818|5880|7074|9353|10371|10381|10458|51330|55816|59277|284217	BDNF|CRABP2|CSF1R|DHFR|EPHA5|EPHB2|EXT1|GAP43|GOLGA4|HSP90AA1|STMN1|MATN2|PRKCA|PTPRF|NECTIN1|RAC2|TIAM1|SLIT2|SEMA3A|TUBB3|BAIAP2|TNFRSF12A|DOK5|NTN4|LAMA1	-1.41138	0	30	0	0	-5.14345	2.59687
1	-2.77173	GO:0007411	M1	1	0	GO Biological Processes	19	axon guidance	-2.77173	2.31836	3.52768	24155	276	604	16	2.64901	0.653421	627|1436|2044|2048|2131|2596|4147|5578|5818|5880|9353|10371|10381|55816|59277|284217	BDNF|CSF1R|EPHA5|EPHB2|EXT1|GAP43|MATN2|PRKCA|NECTIN1|RAC2|SLIT2|SEMA3A|TUBB3|DOK5|NTN4|LAMA1	-1.32224	0	30	0	0	-5.14345	2.59687
1	-2.75575	GO:0097485	M1	1	0	GO Biological Processes	19	neuron projection guidance	-2.75575	2.30999	3.5117	24155	277	604	16	2.64901	0.653421	627|1436|2044|2048|2131|2596|4147|5578|5818|5880|9353|10371|10381|55816|59277|284217	BDNF|CSF1R|EPHA5|EPHB2|EXT1|GAP43|MATN2|PRKCA|NECTIN1|RAC2|SLIT2|SEMA3A|TUBB3|DOK5|NTN4|LAMA1	-1.3092	0	30	0	0	-5.14345	2.59687
1	-2.75424	GO:0007409	M1	1	0	GO Biological Processes	19	axonogenesis	-2.75424	1.96541	3.37743	24155	468	604	23	3.80795	0.778747	627|1382|1436|2044|2048|2131|2596|2803|3320|3925|4147|5578|5818|5880|7074|9353|10371|10381|10458|51330|55816|59277|284217	BDNF|CRABP2|CSF1R|EPHA5|EPHB2|EXT1|GAP43|GOLGA4|HSP90AA1|STMN1|MATN2|PRKCA|NECTIN1|RAC2|TIAM1|SLIT2|SEMA3A|TUBB3|BAIAP2|TNFRSF12A|DOK5|NTN4|LAMA1	-1.30827	0	30	0	0	-5.14345	2.59687
1	-2.68396	GO:0050769	M1	1	0	GO Biological Processes	19	positive regulation of neurogenesis	-2.68396	1.94053	3.31183	24155	474	604	23	3.80795	0.778747	274|627|1382|1745|2048|2119|2146|2803|3082|3569|3655|3976|4602|6664|7074|8200|9353|10371|10458|23529|51330|64764|65981	BIN1|BDNF|CRABP2|DLX1|EPHB2|ETV5|EZH2|GOLGA4|HGF|IL6|ITGA6|LIF|MYB|SOX11|TIAM1|GDF5|SLIT2|SEMA3A|BAIAP2|CLCF1|TNFRSF12A|CREB3L2|CAPRIN2	-1.24951	0	30	0	0	-5.14345	2.59687
1	-2.64351	GO:0000904	M1	1	0	GO Biological Processes	19	cell morphogenesis involved in differentiation	-2.64351	1.71777	3.1869	24155	745	604	32	5.29801	0.911418	627|1382|1436|2044|2048|2131|2596|2803|3320|3925|3987|4147|5578|5818|5880|7074|9353|9912|9928|10371|10381|10458|23043|51330|55619|55816|57493|57520|57580|59277|65981|284217	BDNF|CRABP2|CSF1R|EPHA5|EPHB2|EXT1|GAP43|GOLGA4|HSP90AA1|STMN1|LIMS1|MATN2|PRKCA|NECTIN1|RAC2|TIAM1|SLIT2|ARHGAP44|KIF14|SEMA3A|TUBB3|BAIAP2|TNIK|TNFRSF12A|DOCK10|DOK5|HEG1|HECW2|PREX1|NTN4|CAPRIN2|LAMA1	-1.22222	0	30	0	0	-5.14345	2.59687
1	-2.46123	GO:0010720	M1	1	0	GO Biological Processes	19	positive regulation of cell development	-2.46123	1.80794	3.07806	24155	553	604	25	4.13907	0.810502	274|627|1382|1745|2048|2119|2146|2803|3082|3569|3655|3976|3987|4602|6664|7074|8200|9353|10371|10458|23529|51330|57580|64764|65981	BIN1|BDNF|CRABP2|DLX1|EPHB2|ETV5|EZH2|GOLGA4|HGF|IL6|ITGA6|LIF|LIMS1|MYB|SOX11|TIAM1|GDF5|SLIT2|SEMA3A|BAIAP2|CLCF1|TNFRSF12A|PREX1|CREB3L2|CAPRIN2	-1.08171	0	30	0	0	-5.14345	2.59687
1	-2.42787	GO:0031344	M1	1	0	GO Biological Processes	19	regulation of cell projection organization	-2.42787	1.69456	3.00396	24155	708	604	30	4.96689	0.884018	627|960|1382|2048|2146|2150|2596|2803|3082|3655|3673|5792|5880|7074|9353|9738|9912|10253|10371|10458|23043|26499|51330|54443|55329|57520|57580|64764|65981|84260	BDNF|CD44|CRABP2|EPHB2|EZH2|F2RL1|GAP43|GOLGA4|HGF|ITGA6|ITGA2|PTPRF|RAC2|TIAM1|SLIT2|CCP110|ARHGAP44|SPRY2|SEMA3A|BAIAP2|TNIK|PLEK2|TNFRSF12A|ANLN|MNS1|HECW2|PREX1|CREB3L2|CAPRIN2|TCHP	-1.05986	0	30	0	0	-5.14345	2.59687
1	-2.41498	GO:0031346	M1	1	0	GO Biological Processes	19	positive regulation of cell projection organization	-2.41498	1.98392	3.10839	24155	383	604	19	3.1457	0.710231	627|1382|2146|2150|2803|3082|3655|3673|5880|7074|9353|9738|10458|26499|51330|54443|55329|64764|65981	BDNF|CRABP2|EZH2|F2RL1|GOLGA4|HGF|ITGA6|ITGA2|RAC2|TIAM1|SLIT2|CCP110|BAIAP2|PLEK2|TNFRSF12A|ANLN|MNS1|CREB3L2|CAPRIN2	-1.04926	0	30	0	0	-5.14345	2.59687
1	-2.26091	GO:0010770	M1	1	0	GO Biological Processes	19	positive regulation of cell morphogenesis involved in differentiation	-2.26091	2.59687	3.18363	24155	154	604	10	1.65563	0.519204	627|1382|2803|3987|7074|9353|10458|51330|57580|65981	BDNF|CRABP2|GOLGA4|LIMS1|TIAM1|SLIT2|BAIAP2|TNFRSF12A|PREX1|CAPRIN2	-0.927	0	30	0	0	-5.14345	2.59687
1	-2.03587	GO:0010769	M1	1	0	GO Biological Processes	19	regulation of cell morphogenesis involved in differentiation	-2.03587	1.99294	2.7761	24155	301	604	15	2.48344	0.63321	627|1382|2048|2803|3987|7074|9353|9912|10371|10458|23043|51330|57520|57580|65981	BDNF|CRABP2|EPHB2|GOLGA4|LIMS1|TIAM1|SLIT2|ARHGAP44|SEMA3A|BAIAP2|TNIK|TNFRSF12A|HECW2|PREX1|CAPRIN2	-0.758927	0	30	0	0	-5.14345	2.59687
1	-2.00224	GO:0051962	M1	1	0	GO Biological Processes	19	positive regulation of nervous system development	-2.00224	1.7002	2.63782	24155	541	604	23	3.80795	0.778747	274|627|1382|1745|2048|2119|2146|2803|3082|3569|3655|3976|4602|6664|7074|8200|9353|10371|10458|23529|51330|64764|65981	BIN1|BDNF|CRABP2|DLX1|EPHB2|ETV5|EZH2|GOLGA4|HGF|IL6|ITGA6|LIF|MYB|SOX11|TIAM1|GDF5|SLIT2|SEMA3A|BAIAP2|CLCF1|TNFRSF12A|CREB3L2|CAPRIN2	-0.735082	0	30	0	0	-5.14345	2.59687
1	-5.0555	GO:0051347	M1	1	0	GO Biological Processes	19	positive regulation of transferase activity	-5.0555	2.21152	5.01834	24155	651	604	36	5.96026	0.963319	627|805|891|994|1163|1436|1956|2146|2247|3082|3084|3150|3181|3184|3320|5515|5982|5983|5984|5985|7039|7074|7477|8091|8797|8915|9052|9928|10253|10298|22974|23043|26585|56034|63922|140609	BDNF|CALM2|CCNB1|CDC25B|CKS1B|CSF1R|EGFR|EZH2|FGF2|HGF|NRG1|HMGN1|HNRNPA2B1|HNRNPD|HSP90AA1|PPP2CA|RFC2|RFC3|RFC4|RFC5|TGFA|TIAM1|WNT7B|HMGA2|TNFRSF10A|BCL10|GPRC5A|KIF14|SPRY2|PAK4|TPX2|TNIK|GREM1|PDGFC|CHTF18|NEK7	-3.26688	0	31	1	1	-5.0555	2.21152
1	-4.11453	GO:0007169	M1	1	0	GO Biological Processes	19	transmembrane receptor protein tyrosine kinase signaling pathway	-4.11453	1.99405	4.3428	24155	722	604	36	5.96026	0.963319	627|1436|1839|1956|2044|2048|2247|2963|3082|3084|3178|3320|3516|3925|4015|4670|5327|5329|5578|7039|7074|9052|9125|10253|10458|10552|11082|23636|26585|55816|56034|56975|64651|64710|79651|387914	BDNF|CSF1R|HBEGF|EGFR|EPHA5|EPHB2|FGF2|GTF2F2|HGF|NRG1|HNRNPA1|HSP90AA1|RBPJ|STMN1|LOX|HNRNPM|PLAT|PLAUR|PRKCA|TGFA|TIAM1|GPRC5A|CNOT9|SPRY2|BAIAP2|ARPC1A|ESM1|NUP62|GREM1|DOK5|PDGFC|FAM20C|CSRNP1|NUCKS1|RHBDF2|SHISA2	-2.43941	0	31	0	0	-5.0555	2.21152
1	-3.91995	GO:0045859	M1	1	0	GO Biological Processes	19	regulation of protein kinase activity	-3.91995	1.90915	4.1771	24155	796	604	38	6.29139	0.987972	627|805|891|993|994|1033|1163|1436|1956|2048|2146|2247|3082|3084|3320|5515|5569|5880|7039|7074|7477|8091|8797|9052|9088|9555|9928|10253|10298|11116|22974|23043|23636|25937|26191|26585|56034|57493	BDNF|CALM2|CCNB1|CDC25A|CDC25B|CDKN3|CKS1B|CSF1R|EGFR|EPHB2|EZH2|FGF2|HGF|NRG1|HSP90AA1|PPP2CA|PKIA|RAC2|TGFA|TIAM1|WNT7B|HMGA2|TNFRSF10A|GPRC5A|PKMYT1|MACROH2A1|KIF14|SPRY2|PAK4|FGFR1OP|TPX2|TNIK|NUP62|WWTR1|PTPN22|GREM1|PDGFC|HEG1	-2.26517	0	31	0	0	-5.0555	2.21152
1	-3.16046	GO:0071900	M1	1	0	GO Biological Processes	19	regulation of protein serine/threonine kinase activity	-3.16046	2.00344	3.7008	24155	519	604	26	4.30464	0.825839	805|891|993|1033|1163|1436|1956|2048|2146|2247|3082|3084|5515|5569|7039|7074|7477|8091|9088|9555|10253|23043|23636|26191|56034|57493	CALM2|CCNB1|CDC25A|CDKN3|CKS1B|CSF1R|EGFR|EPHB2|EZH2|FGF2|HGF|NRG1|PPP2CA|PKIA|TGFA|TIAM1|WNT7B|HMGA2|PKMYT1|MACROH2A1|SPRY2|TNIK|NUP62|PTPN22|PDGFC|HEG1	-1.6325	0	31	0	0	-5.0555	2.21152
1	-2.98175	GO:0045860	M1	1	0	GO Biological Processes	19	positive regulation of protein kinase activity	-2.98175	1.94716	3.54449	24155	534	604	26	4.30464	0.825839	627|805|891|994|1163|1436|1956|2146|2247|3082|3084|3320|5515|7039|7074|7477|8091|8797|9052|9928|10253|10298|22974|23043|26585|56034	BDNF|CALM2|CCNB1|CDC25B|CKS1B|CSF1R|EGFR|EZH2|FGF2|HGF|NRG1|HSP90AA1|PPP2CA|TGFA|TIAM1|WNT7B|HMGA2|TNFRSF10A|GPRC5A|KIF14|SPRY2|PAK4|TPX2|TNIK|GREM1|PDGFC	-1.48833	0	31	0	0	-5.0555	2.21152
1	-2.84557	GO:0033674	M1	1	0	GO Biological Processes	19	positive regulation of kinase activity	-2.84557	1.87787	3.41194	24155	575	604	27	4.4702	0.840842	627|805|891|994|1163|1436|1956|2146|2247|3082|3084|3320|5515|7039|7074|7477|8091|8797|8915|9052|9928|10253|10298|22974|23043|26585|56034	BDNF|CALM2|CCNB1|CDC25B|CKS1B|CSF1R|EGFR|EZH2|FGF2|HGF|NRG1|HSP90AA1|PPP2CA|TGFA|TIAM1|WNT7B|HMGA2|TNFRSF10A|BCL10|GPRC5A|KIF14|SPRY2|PAK4|TPX2|TNIK|GREM1|PDGFC	-1.38294	0	31	0	0	-5.0555	2.21152
1	-2.71889	R-HSA-9006934	M1	1	0	Reactome Gene Sets	6	Signaling by Receptor Tyrosine Kinases	-2.71889	1.95289	3.34451	24155	471	604	23	3.80795	0.778747	627|805|1839|1956|2247|2963|3082|3084|3178|3320|3673|3925|4670|5327|5515|5578|7039|7074|9306|10253|10458|56034|284217	BDNF|CALM2|HBEGF|EGFR|FGF2|GTF2F2|HGF|NRG1|HNRNPA1|HSP90AA1|ITGA2|STMN1|HNRNPM|PLAT|PPP2CA|PRKCA|TGFA|TIAM1|SOCS6|SPRY2|BAIAP2|PDGFC|LAMA1	-1.27872	0	31	0	0	-5.0555	2.21152
1	-2.65816	GO:0043408	M1	1	0	GO Biological Processes	19	regulation of MAPK cascade	-2.65816	1.70507	3.19287	24155	774	604	33	5.46358	0.92474	960|1436|1880|1956|2048|2146|2150|2247|2305|3082|3084|3569|3589|3976|5515|5578|7039|7074|7477|8200|10253|10298|10371|10457|23043|23636|26191|26585|27178|55816|55872|56034|201163	CD44|CSF1R|GPR183|EGFR|EPHB2|EZH2|F2RL1|FGF2|FOXM1|HGF|NRG1|IL6|IL11|LIF|PPP2CA|PRKCA|TGFA|TIAM1|WNT7B|GDF5|SPRY2|PAK4|SEMA3A|GPNMB|TNIK|NUP62|PTPN22|GREM1|IL37|DOK5|PBK|PDGFC|FLCN	-1.23136	0	31	0	0	-5.0555	2.21152
1	-2.30089	GO:0071902	M1	1	0	GO Biological Processes	19	positive regulation of protein serine/threonine kinase activity	-2.30089	2.02339	3.02522	24155	336	604	17	2.81457	0.672958	805|891|1163|1436|1956|2146|2247|3082|3084|5515|7039|7074|7477|8091|10253|23043|56034	CALM2|CCNB1|CKS1B|CSF1R|EGFR|EZH2|FGF2|HGF|NRG1|PPP2CA|TGFA|TIAM1|WNT7B|HMGA2|SPRY2|TNIK|PDGFC	-0.960615	0	31	0	0	-5.0555	2.21152
1	-2.21765	GO:0043410	M1	1	0	GO Biological Processes	19	positive regulation of MAPK cascade	-2.21765	1.75146	2.84961	24155	548	604	24	3.97351	0.794812	960|1436|1880|1956|2146|2150|2247|3082|3084|3569|3589|3976|5578|7039|7074|7477|10253|10371|10457|23043|26191|27178|55816|56034	CD44|CSF1R|GPR183|EGFR|EZH2|F2RL1|FGF2|HGF|NRG1|IL6|IL11|LIF|PRKCA|TGFA|TIAM1|WNT7B|SPRY2|SEMA3A|GPNMB|TNIK|PTPN22|IL37|DOK5|PDGFC	-0.895352	0	31	0	0	-5.0555	2.21152
1	-5.03739	GO:0051640	M1	1	0	GO Biological Processes	19	organelle localization	-5.03739	2.15253	4.97737	24155	706	604	38	6.29139	0.987972	274|372|636|891|1063|3320|3692|4085|4927|5880|6804|7039|7283|7534|7846|8379|9493|9738|9787|9793|9928|10253|10383|10615|10733|11116|22995|23344|23636|51203|54908|55165|80179|84902|89958|93323|95681|347240	BIN1|ARCN1|BICD1|CCNB1|CENPF|HSP90AA1|EIF6|MAD2L1|NUP88|RAC2|STX1A|TGFA|TUBG1|YWHAZ|TUBA1A|MAD1L1|KIF23|CCP110|DLGAP5|CKAP5|KIF14|SPRY2|TUBB4B|SPAG5|PLK4|FGFR1OP|CEP152|ESYT1|NUP62|NUSAP1|SPDL1|CEP55|MYO19|CEP89|SAPCD2|HAUS8|CEP41|KIF24	-3.25352	0	32	1	1	-5.03739	5.33223
1	-3.92508	GO:0051310	M1	1	0	GO Biological Processes	19	metaphase plate congression	-3.92508	5.33223	5.38062	24155	60	604	8	1.3245	0.465171	891|1063|8379|9928|10615|23636|54908|55165	CCNB1|CENPF|MAD1L1|KIF14|SPAG5|NUP62|SPDL1|CEP55	-2.26935	0	32	0	0	-5.03739	5.33223
1	-3.84934	GO:0051303	M1	1	0	GO Biological Processes	19	establishment of chromosome localization	-3.84934	4.61443	5.12029	24155	78	604	9	1.49007	0.492974	891|1063|8379|9787|9928|10615|23636|54908|55165	CCNB1|CENPF|MAD1L1|DLGAP5|KIF14|SPAG5|NUP62|SPDL1|CEP55	-2.20018	0	32	0	0	-5.03739	5.33223
1	-3.8064	GO:0050000	M1	1	0	GO Biological Processes	19	chromosome localization	-3.8064	4.55602	5.06983	24155	79	604	9	1.49007	0.492974	891|1063|8379|9787|9928|10615|23636|54908|55165	CCNB1|CENPF|MAD1L1|DLGAP5|KIF14|SPAG5|NUP62|SPDL1|CEP55	-2.1719	0	32	0	0	-5.03739	5.33223
1	-2.97007	GO:0007080	M1	1	0	GO Biological Processes	19	mitotic metaphase plate congression	-2.97007	5.10533	4.51154	24155	47	604	6	0.993377	0.403525	891|8379|9928|23636|54908|55165	CCNB1|MAD1L1|KIF14|NUP62|SPDL1|CEP55	-1.47989	0	32	0	0	-5.03739	5.33223
1	-2.00578	GO:0051656	M1	1	0	GO Biological Processes	19	establishment of organelle localization	-2.00578	1.72513	2.65058	24155	510	604	22	3.64238	0.762285	636|891|1063|3692|4085|4927|5880|6804|7039|7534|8379|9493|9787|9928|10253|10615|23636|51203|54908|55165|80179|89958	BICD1|CCNB1|CENPF|EIF6|MAD2L1|NUP88|RAC2|STX1A|TGFA|YWHAZ|MAD1L1|KIF23|DLGAP5|KIF14|SPRY2|SPAG5|NUP62|NUSAP1|SPDL1|CEP55|MYO19|SAPCD2	-0.737064	0	32	0	0	-5.03739	5.33223
1	-5.00198	GO:0031570	M1	1	0	GO Biological Processes	19	DNA integrity checkpoint	-5.00198	3.82087	5.67875	24155	157	604	15	2.48344	0.63321	672|891|3014|5111|7027|8091|8318|8914|9125|29980|51512|51514|54962|79968|144455	BRCA1|CCNB1|H2AX|PCNA|TFDP1|HMGA2|CDC45|TIMELESS|CNOT9|DONSON|GTSE1|DTL|TIPIN|WDR76|E2F7	-3.22226	0	33	1	1	-5.00198	6.66529
1	-4.81633	GO:0072331	M1	1	0	GO Biological Processes	19	signal transduction by p53 class mediator	-4.81633	2.98446	5.23162	24155	268	604	20	3.31126	0.728058	672|891|960|2305|5111|5932|5982|5983|5984|5985|6117|7027|8444|9125|9156|22974|26585|51512|83596|144455	BRCA1|CCNB1|CD44|FOXM1|PCNA|RBBP8|RFC2|RFC3|RFC4|RFC5|RPA1|TFDP1|DYRK3|CNOT9|EXO1|TPX2|GREM1|GTSE1|BCL2L12|E2F7	-3.05869	0	33	0	0	-5.00198	6.66529
1	-4.27174	R-HSA-3700989	M1	1	0	Reactome Gene Sets	6	Transcriptional Regulation by TP53	-4.27174	2.52003	4.68607	24155	365	604	23	3.80795	0.778747	332|672|891|2177|2963|5111|5515|5932|5982|5983|5984|5985|6117|6446|7027|7534|8797|9125|9156|10971|22974|55215|144455	BIRC5|BRCA1|CCNB1|FANCD2|GTF2F2|PCNA|PPP2CA|RBBP8|RFC2|RFC3|RFC4|RFC5|RPA1|SGK1|TFDP1|YWHAZ|TNFRSF10A|CNOT9|EXO1|YWHAQ|TPX2|FANCI|E2F7	-2.57015	0	33	0	0	-5.00198	6.66529
1	-4.12748	GO:0000077	M1	1	0	GO Biological Processes	19	DNA damage checkpoint	-4.12748	3.58546	5.00075	24155	145	604	13	2.15232	0.590487	672|891|3014|5111|7027|8091|9125|29980|51512|51514|54962|79968|144455	BRCA1|CCNB1|H2AX|PCNA|TFDP1|HMGA2|CNOT9|DONSON|GTSE1|DTL|TIPIN|WDR76|E2F7	-2.45042	0	33	0	0	-5.00198	6.66529
1	-4.07539	GO:0071156	M1	1	0	GO Biological Processes	19	regulation of cell cycle arrest	-4.07539	4.07323	5.12607	24155	108	604	11	1.82119	0.544087	274|672|891|2124|2305|5111|7027|8091|9125|51512|144455	BIN1|BRCA1|CCNB1|EVI2B|FOXM1|PCNA|TFDP1|HMGA2|CNOT9|GTSE1|E2F7	-2.40359	0	33	0	0	-5.00198	6.66529
1	-4.02844	GO:0072395	M1	1	0	GO Biological Processes	19	signal transduction involved in cell cycle checkpoint	-4.02844	4.86386	5.33099	24155	74	604	9	1.49007	0.492974	672|891|5111|6664|7027|9125|51512|51514|144455	BRCA1|CCNB1|PCNA|SOX11|TFDP1|CNOT9|GTSE1|DTL|E2F7	-2.36411	0	33	0	0	-5.00198	6.66529
1	-3.4504	GO:0030330	M1	1	0	GO Biological Processes	19	DNA damage response, signal transduction by p53 class mediator	-3.4504	3.73754	4.54487	24155	107	604	10	1.65563	0.519204	672|891|960|2305|5111|7027|8444|9125|51512|144455	BRCA1|CCNB1|CD44|FOXM1|PCNA|TFDP1|DYRK3|CNOT9|GTSE1|E2F7	-1.8748	0	33	0	0	-5.00198	6.66529
1	-3.32783	GO:0072401	M1	1	0	GO Biological Processes	19	signal transduction involved in DNA integrity checkpoint	-3.32783	4.38265	4.63533	24155	73	604	8	1.3245	0.465171	672|891|5111|7027|9125|51512|51514|144455	BRCA1|CCNB1|PCNA|TFDP1|CNOT9|GTSE1|DTL|E2F7	-1.76769	0	33	0	0	-5.00198	6.66529
1	-3.32783	GO:0072422	M1	1	0	GO Biological Processes	19	signal transduction involved in DNA damage checkpoint	-3.32783	4.38265	4.63533	24155	73	604	8	1.3245	0.465171	672|891|5111|7027|9125|51512|51514|144455	BRCA1|CCNB1|PCNA|TFDP1|CNOT9|GTSE1|DTL|E2F7	-1.76769	0	33	0	0	-5.00198	6.66529
1	-3.27951	GO:0042770	M1	1	0	GO Biological Processes	19	signal transduction in response to DNA damage	-3.27951	3.30759	4.27354	24155	133	604	11	1.82119	0.544087	672|891|960|2305|5111|7027|8444|9125|51512|51514|144455	BRCA1|CCNB1|CD44|FOXM1|PCNA|TFDP1|DYRK3|CNOT9|GTSE1|DTL|E2F7	-1.7288	0	33	0	0	-5.00198	6.66529
1	-3.13696	GO:0044773	M1	1	0	GO Biological Processes	19	mitotic DNA damage checkpoint	-3.13696	3.71057	4.28376	24155	97	604	9	1.49007	0.492974	891|5111|7027|8091|9125|29980|51512|54962|144455	CCNB1|PCNA|TFDP1|HMGA2|CNOT9|DONSON|GTSE1|TIPIN|E2F7	-1.61428	0	33	0	0	-5.00198	6.66529
1	-2.98935	GO:0071158	M1	1	0	GO Biological Processes	19	positive regulation of cell cycle arrest	-2.98935	3.90163	4.21495	24155	82	604	8	1.3245	0.465171	672|891|5111|7027|8091|9125|51512|144455	BRCA1|CCNB1|PCNA|TFDP1|HMGA2|CNOT9|GTSE1|E2F7	-1.49397	0	33	0	0	-5.00198	6.66529
1	-2.8614	GO:0044774	M1	1	0	GO Biological Processes	19	mitotic DNA integrity checkpoint	-2.8614	3.39552	3.95834	24155	106	604	9	1.49007	0.492974	891|5111|7027|8091|9125|29980|51512|54962|144455	CCNB1|PCNA|TFDP1|HMGA2|CNOT9|DONSON|GTSE1|TIPIN|E2F7	-1.39634	0	33	0	0	-5.00198	6.66529
1	-2.74499	GO:1902806	M1	1	0	GO Biological Processes	19	regulation of cell cycle G1/S phase transition	-2.74499	2.57372	3.59694	24155	202	604	13	2.15232	0.590487	891|1956|2146|5111|7027|8318|9125|9928|10197|10457|51512|79447|144455	CCNB1|EGFR|EZH2|PCNA|TFDP1|CDC45|CNOT9|KIF14|PSME3|GPNMB|GTSE1|PAGR1|E2F7	-1.29961	0	33	0	0	-5.00198	6.66529
1	-2.62323	GO:2000045	M1	1	0	GO Biological Processes	19	regulation of G1/S transition of mitotic cell cycle	-2.62323	2.60816	3.50673	24155	184	604	12	1.98675	0.567801	891|1956|2146|5111|7027|8318|9125|9928|10197|10457|51512|144455	CCNB1|EGFR|EZH2|PCNA|TFDP1|CDC45|CNOT9|KIF14|PSME3|GPNMB|GTSE1|E2F7	-1.20987	0	33	0	0	-5.00198	6.66529
1	-2.57161	GO:0006977	M1	1	0	GO Biological Processes	19	DNA damage response, signal transduction by p53 class mediator resulting in cell cycle arrest	-2.57161	4.28483	3.94108	24155	56	604	6	0.993377	0.403525	891|5111|7027|9125|51512|144455	CCNB1|PCNA|TFDP1|CNOT9|GTSE1|E2F7	-1.16523	0	33	0	0	-5.00198	6.66529
1	-2.55111	GO:0007050	M1	1	0	GO Biological Processes	19	cell cycle arrest	-2.55111	2.35245	3.35789	24155	238	604	14	2.31788	0.612258	274|672|891|1033|2124|2305|5111|7027|8091|9125|28227|51512|55771|144455	BIN1|BRCA1|CCNB1|CDKN3|EVI2B|FOXM1|PCNA|TFDP1|HMGA2|CNOT9|PPP2R3B|GTSE1|PRR11|E2F7	-1.15054	0	33	0	0	-5.00198	6.66529
1	-2.53241	GO:0072431	M1	1	0	GO Biological Processes	19	signal transduction involved in mitotic G1 DNA damage checkpoint	-2.53241	4.20965	3.8852	24155	57	604	6	0.993377	0.403525	891|5111|7027|9125|51512|144455	CCNB1|PCNA|TFDP1|CNOT9|GTSE1|E2F7	-1.13811	0	33	0	0	-5.00198	6.66529
1	-2.53241	GO:1902400	M1	1	0	GO Biological Processes	19	intracellular signal transduction involved in G1 DNA damage checkpoint	-2.53241	4.20965	3.8852	24155	57	604	6	0.993377	0.403525	891|5111|7027|9125|51512|144455	CCNB1|PCNA|TFDP1|CNOT9|GTSE1|E2F7	-1.13811	0	33	0	0	-5.00198	6.66529
1	-2.45659	GO:0072413	M1	1	0	GO Biological Processes	19	signal transduction involved in mitotic cell cycle checkpoint	-2.45659	4.06695	3.77719	24155	59	604	6	0.993377	0.403525	891|5111|7027|9125|51512|144455	CCNB1|PCNA|TFDP1|CNOT9|GTSE1|E2F7	-1.07956	0	33	0	0	-5.00198	6.66529
1	-2.45659	GO:1902402	M1	1	0	GO Biological Processes	19	signal transduction involved in mitotic DNA damage checkpoint	-2.45659	4.06695	3.77719	24155	59	604	6	0.993377	0.403525	891|5111|7027|9125|51512|144455	CCNB1|PCNA|TFDP1|CNOT9|GTSE1|E2F7	-1.07956	0	33	0	0	-5.00198	6.66529
1	-2.45659	GO:1902403	M1	1	0	GO Biological Processes	19	signal transduction involved in mitotic DNA integrity checkpoint	-2.45659	4.06695	3.77719	24155	59	604	6	0.993377	0.403525	891|5111|7027|9125|51512|144455	CCNB1|PCNA|TFDP1|CNOT9|GTSE1|E2F7	-1.07956	0	33	0	0	-5.00198	6.66529
1	-2.3145	GO:0031571	M1	1	0	GO Biological Processes	19	mitotic G1 DNA damage checkpoint	-2.3145	3.80874	3.57481	24155	63	604	6	0.993377	0.403525	891|5111|7027|9125|51512|144455	CCNB1|PCNA|TFDP1|CNOT9|GTSE1|E2F7	-0.970546	0	33	0	0	-5.00198	6.66529
1	-2.3145	GO:0044819	M1	1	0	GO Biological Processes	19	mitotic G1/S transition checkpoint	-2.3145	3.80874	3.57481	24155	63	604	6	0.993377	0.403525	891|5111|7027|9125|51512|144455	CCNB1|PCNA|TFDP1|CNOT9|GTSE1|E2F7	-0.970546	0	33	0	0	-5.00198	6.66529
1	-2.28081	GO:0044783	M1	1	0	GO Biological Processes	19	G1 DNA damage checkpoint	-2.28081	3.74922	3.5268	24155	64	604	6	0.993377	0.403525	891|5111|7027|9125|51512|144455	CCNB1|PCNA|TFDP1|CNOT9|GTSE1|E2F7	-0.943272	0	33	0	0	-5.00198	6.66529
1	-2.13041	R-HSA-6791312	M1	1	0	Reactome Gene Sets	6	TP53 Regulates Transcription of Cell Cycle Genes	-2.13041	4.08079	3.45705	24155	49	604	5	0.827815	0.368674	891|5111|7027|9125|144455	CCNB1|PCNA|TFDP1|CNOT9|E2F7	-0.836945	0	33	0	0	-5.00198	6.66529
1	-2.01796	R-HSA-6804114	M1	1	0	Reactome Gene Sets	6	TP53 Regulates Transcription of Genes Involved in G2 Cell Cycle Arrest	-2.01796	6.66529	3.85057	24155	18	604	3	0.496689	0.28605	891|5111|7027	CCNB1|PCNA|TFDP1	-0.746526	0	33	0	0	-5.00198	6.66529
1	-4.93798	GO:0008608	M1	1	0	GO Biological Processes	19	attachment of spindle microtubules to kinetochore	-4.93798	8.74819	7.02373	24155	32	604	7	1.15894	0.435493	891|7756|8379|9184|10615|29127|151648	CCNB1|ZNF207|MAD1L1|BUB3|SPAG5|RACGAP1|SGO1	-3.16327	0	34	1	1	-4.93798	9.99793
1	-2.53886	GO:0051988	M1	1	0	GO Biological Processes	19	regulation of attachment of spindle microtubules to kinetochore	-2.53886	9.99793	4.99282	24155	12	604	3	0.496689	0.28605	891|10615|29127	CCNB1|SPAG5|RACGAP1	-1.14352	0	34	0	0	-4.93798	9.99793
1	-4.89416	GO:0006273	M1	1	0	GO Biological Processes	19	lagging strand elongation	-4.89416	22.8524	9.26011	24155	7	604	4	0.662252	0.330028	2237|3978|5422|10535	FEN1|LIG1|POLA1|RNASEH2A	-3.12316	0	35	1	1	-4.89416	23.995
1	-3.82437	GO:0033567	M1	1	0	GO Biological Processes	19	DNA replication, Okazaki fragment processing	-3.82437	23.995	8.2351	24155	5	604	3	0.496689	0.28605	2237|3978|10535	FEN1|LIG1|RNASEH2A	-2.18169	0	35	0	0	-4.89416	23.995
1	-2.78589	R-HSA-5685939	M1	1	0	Reactome Gene Sets	6	HDR through MMEJ (alt-NHEJ)	-2.78589	11.9975	5.57044	24155	10	604	3	0.496689	0.28605	2237|5932|10721	FEN1|RBBP8|POLQ	-1.33286	0	35	0	0	-4.89416	23.995
1	-4.86404	GO:0009411	M1	1	0	GO Biological Processes	19	response to UV	-4.86404	3.94285	5.63244	24155	142	604	14	2.31788	0.612258	993|1956|2237|2956|3150|5111|5422|5424|5743|9768|10714|51514|54962|55872	CDC25A|EGFR|FEN1|MSH6|HMGN1|PCNA|POLA1|POLD1|PTGS2|PCLAF|POLD3|DTL|TIPIN|PBK	-3.09794	0	36	1	1	-4.86404	3.94285
1	-4.1348	GO:0009314	M1	1	0	GO Biological Processes	19	response to radiation	-4.1348	2.31578	4.50698	24155	449	604	26	4.30464	0.825839	672|993|1956|2177|2237|2956|3014|3150|5111|5422|5424|5743|6240|8091|8438|8533|8553|8863|9768|10276|10635|10714|51514|54962|55872|64710	BRCA1|CDC25A|EGFR|FANCD2|FEN1|MSH6|H2AX|HMGN1|PCNA|POLA1|POLD1|PTGS2|RRM1|HMGA2|RAD54L|COPS3|BHLHE40|PER3|PCLAF|NET1|RAD51AP1|POLD3|DTL|TIPIN|PBK|NUCKS1	-2.45475	0	36	0	0	-4.86404	3.94285
1	-3.10257	GO:0071214	M1	1	0	GO Biological Processes	19	cellular response to abiotic stimulus	-3.10257	2.28181	3.77194	24155	333	604	19	3.1457	0.710231	231|993|1956|2022|3014|3673|5111|5422|5424|5743|8091|8111|8797|8915|10276|10635|10714|55872|64710	AKR1B1|CDC25A|EGFR|ENG|H2AX|ITGA2|PCNA|POLA1|POLD1|PTGS2|HMGA2|GPR68|TNFRSF10A|BCL10|NET1|RAD51AP1|POLD3|PBK|NUCKS1	-1.58655	0	36	0	0	-4.86404	3.94285
1	-3.10257	GO:0104004	M1	1	0	GO Biological Processes	19	cellular response to environmental stimulus	-3.10257	2.28181	3.77194	24155	333	604	19	3.1457	0.710231	231|993|1956|2022|3014|3673|5111|5422|5424|5743|8091|8111|8797|8915|10276|10635|10714|55872|64710	AKR1B1|CDC25A|EGFR|ENG|H2AX|ITGA2|PCNA|POLA1|POLD1|PTGS2|HMGA2|GPR68|TNFRSF10A|BCL10|NET1|RAD51AP1|POLD3|PBK|NUCKS1	-1.58655	0	36	0	0	-4.86404	3.94285
1	-2.58234	GO:0009416	M1	1	0	GO Biological Processes	19	response to light stimulus	-2.58234	2.15828	3.31379	24155	315	604	17	2.81457	0.672958	993|1956|2237|2956|3150|5111|5422|5424|5743|8533|8553|8863|9768|10714|51514|54962|55872	CDC25A|EGFR|FEN1|MSH6|HMGN1|PCNA|POLA1|POLD1|PTGS2|COPS3|BHLHE40|PER3|PCLAF|POLD3|DTL|TIPIN|PBK	-1.17489	0	36	0	0	-4.86404	3.94285
1	-2.47216	GO:0071478	M1	1	0	GO Biological Processes	19	cellular response to radiation	-2.47216	2.49948	3.34064	24155	192	604	12	1.98675	0.567801	993|3014|5111|5422|5424|5743|8091|10276|10635|10714|55872|64710	CDC25A|H2AX|PCNA|POLA1|POLD1|PTGS2|HMGA2|NET1|RAD51AP1|POLD3|PBK|NUCKS1	-1.09063	0	36	0	0	-4.86404	3.94285
1	-2.32254	GO:0034644	M1	1	0	GO Biological Processes	19	cellular response to UV	-2.32254	3.3728	3.46778	24155	83	604	7	1.15894	0.435493	993|5111|5422|5424|5743|10714|55872	CDC25A|PCNA|POLA1|POLD1|PTGS2|POLD3|PBK	-0.976742	0	36	0	0	-4.86404	3.94285
1	-4.66566	R-HSA-8953750	M1	1	0	Reactome Gene Sets	6	Transcriptional Regulation by E2F6	-4.66566	7.99834	6.63512	24155	35	604	7	1.15894	0.435493	672|2146|5932|6241|7027|23468|23512	BRCA1|EZH2|RBBP8|RRM2|TFDP1|CBX5|SUZ12	-2.92561	0	37	1	1	-4.66566	7.99834
1	-4.19789	GO:0070317	M1	1	0	GO Biological Processes	19	negative regulation of G0 to G1 transition	-4.19789	6.82785	5.98101	24155	41	604	7	1.15894	0.435493	672|2146|5932|6241|7027|23468|23512	BRCA1|EZH2|RBBP8|RRM2|TFDP1|CBX5|SUZ12	-2.50771	0	37	0	0	-4.66566	7.99834
1	-3.93039	GO:0070316	M1	1	0	GO Biological Processes	19	regulation of G0 to G1 transition	-3.93039	6.22093	5.61389	24155	45	604	7	1.15894	0.435493	672|2146|5932|6241|7027|23468|23512	BRCA1|EZH2|RBBP8|RRM2|TFDP1|CBX5|SUZ12	-2.27371	0	37	0	0	-4.66566	7.99834
1	-3.8074	GO:0045023	M1	1	0	GO Biological Processes	19	G0 to G1 transition	-3.8074	5.95621	5.44662	24155	47	604	7	1.15894	0.435493	672|2146|5932|6241|7027|23468|23512	BRCA1|EZH2|RBBP8|RRM2|TFDP1|CBX5|SUZ12	-2.1719	0	37	0	0	-4.66566	7.99834
1	-3.75302	M84	M1	1	0	Canonical Pathways	11	PID ATM PATHWAY	-3.75302	7.05736	5.66023	24155	34	604	6	0.993377	0.403525	672|993|2177|3014|5932|9126	BRCA1|CDC25A|FANCD2|H2AX|RBBP8|SMC3	-2.12479	0	37	0	0	-4.66566	7.99834
1	-3.38814	R-HSA-5693554	M1	1	0	Reactome Gene Sets	6	Resolution of D-loop Structures through Synthesis-Dependent Strand Annealing (SDSA)	-3.38814	7.69072	5.46636	24155	26	604	5	0.827815	0.368674	672|5932|9156|10635|51750	BRCA1|RBBP8|EXO1|RAD51AP1|RTEL1	-1.81879	0	37	0	0	-4.66566	7.99834
1	-2.83328	R-HSA-5693537	M1	1	0	Reactome Gene Sets	6	Resolution of D-Loop Structures	-2.83328	5.88114	4.56111	24155	34	604	5	0.827815	0.368674	672|5932|9156|10635|51750	BRCA1|RBBP8|EXO1|RAD51AP1|RTEL1	-1.37255	0	37	0	0	-4.66566	7.99834
1	-2.25216	M258	M1	1	0	Canonical Pathways	11	PID BARD1 PATHWAY	-2.25216	5.5161	3.89698	24155	29	604	4	0.662252	0.330028	672|2177|5111|5932	BRCA1|FANCD2|PCNA|RBBP8	-0.923175	0	37	0	0	-4.66566	7.99834
1	-2.04997	R-HSA-5693568	M1	1	0	Reactome Gene Sets	6	Resolution of D-loop Structures through Holliday Junction Intermediates	-2.04997	4.84748	3.54189	24155	33	604	4	0.662252	0.330028	672|5932|9156|10635	BRCA1|RBBP8|EXO1|RAD51AP1	-0.770656	0	37	0	0	-4.66566	7.99834
1	-4.63681	GO:0046649	M1	1	0	GO Biological Processes	19	lymphocyte activation	-4.63681	2.06479	4.69815	24155	736	604	38	6.29139	0.987972	865|960|1794|1880|2150|2177|2956|3070|3516|3569|3589|4602|4860|5880|6664|6932|7468|8379|8915|9156|9306|10457|10808|23240|23529|23705|26191|27086|29781|51083|55619|57580|64332|80380|84695|114548|118460|338376	CBFB|CD44|DOCK2|GPR183|F2RL1|FANCD2|MSH6|HELLS|RBPJ|IL6|IL11|MYB|PNP|RAC2|SOX11|TCF7|NSD2|MAD1L1|BCL10|EXO1|SOCS6|GPNMB|HSPH1|TMEM131L|CLCF1|CADM1|PTPN22|FOXP1|NCAPH2|GAL|DOCK10|PREX1|NFKBIZ|PDCD1LG2|LOXL3|NLRP3|EXOSC6|IFNE	-2.89906	0	38	1	1	-4.63681	6.66529
1	-4.31005	GO:0002521	M1	1	0	GO Biological Processes	19	leukocyte differentiation	-4.31005	2.2476	4.58768	24155	516	604	29	4.80132	0.869916	865|1436|1794|1880|2124|2150|2177|3516|3569|3589|3976|4602|4860|5578|6932|10234|23240|23529|26191|27086|29781|55619|56975|57580|64332|84695|114548|284266|338376	CBFB|CSF1R|DOCK2|GPR183|EVI2B|F2RL1|FANCD2|RBPJ|IL6|IL11|LIF|MYB|PNP|PRKCA|TCF7|LRRC17|TMEM131L|CLCF1|PTPN22|FOXP1|NCAPH2|DOCK10|FAM20C|PREX1|NFKBIZ|LOXL3|NLRP3|SIGLEC15|IFNE	-2.60635	0	38	0	0	-4.63681	6.66529
1	-4.27527	GO:0042110	M1	1	0	GO Biological Processes	19	T cell activation	-4.27527	2.31712	4.59782	24155	466	604	27	4.4702	0.840842	865|960|1794|1880|2150|2177|3569|4602|4860|5880|6932|8379|8915|9306|10457|10808|23240|23705|26191|27086|29781|57580|64332|80380|84695|114548|338376	CBFB|CD44|DOCK2|GPR183|F2RL1|FANCD2|IL6|MYB|PNP|RAC2|TCF7|MAD1L1|BCL10|SOCS6|GPNMB|HSPH1|TMEM131L|CADM1|PTPN22|FOXP1|NCAPH2|PREX1|NFKBIZ|PDCD1LG2|LOXL3|NLRP3|IFNE	-2.57262	0	38	0	0	-4.63681	6.66529
1	-4.24537	GO:0002285	M1	1	0	GO Biological Processes	19	lymphocyte activation involved in immune response	-4.24537	3.29602	4.97919	24155	182	604	15	2.48344	0.63321	1880|2150|2956|3569|4602|7468|9156|23529|27086|55619|64332|84695|114548|118460|338376	GPR183|F2RL1|MSH6|IL6|MYB|NSD2|EXO1|CLCF1|FOXP1|DOCK10|NFKBIZ|LOXL3|NLRP3|EXOSC6|IFNE	-2.54588	0	38	0	0	-4.63681	6.66529
1	-3.72913	GO:0046631	M1	1	0	GO Biological Processes	19	alpha-beta T cell activation	-3.72913	3.47754	4.67422	24155	138	604	12	1.98675	0.567801	865|1794|1880|3569|4602|4860|6932|10808|27086|64332|84695|114548	CBFB|DOCK2|GPR183|IL6|MYB|PNP|TCF7|HSPH1|FOXP1|NFKBIZ|LOXL3|NLRP3	-2.10619	0	38	0	0	-4.63681	6.66529
1	-3.65469	GO:0046632	M1	1	0	GO Biological Processes	19	alpha-beta T cell differentiation	-3.65469	3.95958	4.77315	24155	101	604	10	1.65563	0.519204	865|1880|3569|4602|4860|6932|27086|64332|84695|114548	CBFB|GPR183|IL6|MYB|PNP|TCF7|FOXP1|NFKBIZ|LOXL3|NLRP3	-2.04386	0	38	0	0	-4.63681	6.66529
1	-3.60944	GO:0030098	M1	1	0	GO Biological Processes	19	lymphocyte differentiation	-3.60944	2.37911	4.18011	24155	353	604	21	3.47682	0.745399	865|1794|1880|2177|3516|3569|3589|4602|4860|6932|23240|23529|26191|27086|29781|55619|57580|64332|84695|114548|338376	CBFB|DOCK2|GPR183|FANCD2|RBPJ|IL6|IL11|MYB|PNP|TCF7|TMEM131L|CLCF1|PTPN22|FOXP1|NCAPH2|DOCK10|PREX1|NFKBIZ|LOXL3|NLRP3|IFNE	-2.0037	0	38	0	0	-4.63681	6.66529
1	-3.45914	GO:0030155	M1	1	0	GO Biological Processes	19	regulation of cell adhesion	-3.45914	1.90437	3.86845	24155	693	604	33	5.46358	0.92474	865|960|3569|3655|3673|3987|4602|4860|5054|5515|5578|5880|7052|8379|8915|9289|9306|9404|9595|9928|10457|10808|23240|26191|55612|57580|64332|80380|84695|84978|114548|201163|284217	CBFB|CD44|IL6|ITGA6|ITGA2|LIMS1|MYB|PNP|SERPINE1|PPP2CA|PRKCA|RAC2|TGM2|MAD1L1|BCL10|ADGRG1|SOCS6|LPXN|CYTIP|KIF14|GPNMB|HSPH1|TMEM131L|PTPN22|FERMT1|PREX1|NFKBIZ|PDCD1LG2|LOXL3|FRMD5|NLRP3|FLCN|LAMA1	-1.88275	0	38	0	0	-4.63681	6.66529
1	-3.41643	GO:0030217	M1	1	0	GO Biological Processes	19	T cell differentiation	-3.41643	2.66611	4.15416	24155	240	604	16	2.64901	0.653421	865|1794|1880|2177|3569|4602|4860|6932|23240|26191|27086|29781|57580|64332|84695|114548	CBFB|DOCK2|GPR183|FANCD2|IL6|MYB|PNP|TCF7|TMEM131L|PTPN22|FOXP1|NCAPH2|PREX1|NFKBIZ|LOXL3|NLRP3	-1.84475	0	38	0	0	-4.63681	6.66529
1	-3.2876	GO:0043367	M1	1	0	GO Biological Processes	19	CD4-positive, alpha-beta T cell differentiation	-3.2876	4.32343	4.58536	24155	74	604	8	1.3245	0.465171	865|1880|3569|4602|27086|64332|84695|114548	CBFB|GPR183|IL6|MYB|FOXP1|NFKBIZ|LOXL3|NLRP3	-1.73499	0	38	0	0	-4.63681	6.66529
1	-3.28622	GO:0002366	M1	1	0	GO Biological Processes	19	leukocyte activation involved in immune response	-3.28622	1.86139	3.72819	24155	709	604	33	5.46358	0.92474	960|1794|1880|2150|2352|2956|3310|3320|3569|3608|4602|4860|5315|5317|5329|5701|5708|5718|5880|7468|9156|10383|11010|23529|27086|55619|64332|79980|84695|114548|118460|124583|338376	CD44|DOCK2|GPR183|F2RL1|FOLR3|MSH6|HSPA6|HSP90AA1|IL6|ILF2|MYB|PNP|PKM|PKP1|PLAUR|PSMC2|PSMD2|PSMD12|RAC2|NSD2|EXO1|TUBB4B|GLIPR1|CLCF1|FOXP1|DOCK10|NFKBIZ|DSN1|LOXL3|NLRP3|EXOSC6|CANT1|IFNE	-1.73434	0	38	0	0	-4.63681	6.66529
1	-3.24418	GO:0002263	M1	1	0	GO Biological Processes	19	cell activation involved in immune response	-3.24418	1.85095	3.69368	24155	713	604	33	5.46358	0.92474	960|1794|1880|2150|2352|2956|3310|3320|3569|3608|4602|4860|5315|5317|5329|5701|5708|5718|5880|7468|9156|10383|11010|23529|27086|55619|64332|79980|84695|114548|118460|124583|338376	CD44|DOCK2|GPR183|F2RL1|FOLR3|MSH6|HSPA6|HSP90AA1|IL6|ILF2|MYB|PNP|PKM|PKP1|PLAUR|PSMC2|PSMD2|PSMD12|RAC2|NSD2|EXO1|TUBB4B|GLIPR1|CLCF1|FOXP1|DOCK10|NFKBIZ|DSN1|LOXL3|NLRP3|EXOSC6|CANT1|IFNE	-1.6997	0	38	0	0	-4.63681	6.66529
1	-3.23072	GO:0042093	M1	1	0	GO Biological Processes	19	T-helper cell differentiation	-3.23072	4.82659	4.67253	24155	58	604	7	1.15894	0.435493	1880|3569|4602|27086|64332|84695|114548	GPR183|IL6|MYB|FOXP1|NFKBIZ|LOXL3|NLRP3	-1.68916	0	38	0	0	-4.63681	6.66529
1	-3.14065	GO:0002294	M1	1	0	GO Biological Processes	19	CD4-positive, alpha-beta T cell differentiation involved in immune response	-3.14065	4.6657	4.55279	24155	60	604	7	1.15894	0.435493	1880|3569|4602|27086|64332|84695|114548	GPR183|IL6|MYB|FOXP1|NFKBIZ|LOXL3|NLRP3	-1.6169	0	38	0	0	-4.63681	6.66529
1	-3.09703	GO:0002287	M1	1	0	GO Biological Processes	19	alpha-beta T cell activation involved in immune response	-3.09703	4.58921	4.49488	24155	61	604	7	1.15894	0.435493	1880|3569|4602|27086|64332|84695|114548	GPR183|IL6|MYB|FOXP1|NFKBIZ|LOXL3|NLRP3	-1.58586	0	38	0	0	-4.63681	6.66529
1	-3.09703	GO:0002293	M1	1	0	GO Biological Processes	19	alpha-beta T cell differentiation involved in immune response	-3.09703	4.58921	4.49488	24155	61	604	7	1.15894	0.435493	1880|3569|4602|27086|64332|84695|114548	GPR183|IL6|MYB|FOXP1|NFKBIZ|LOXL3|NLRP3	-1.58586	0	38	0	0	-4.63681	6.66529
1	-2.98678	GO:1903706	M1	1	0	GO Biological Processes	19	regulation of hemopoiesis	-2.98678	2.01216	3.57557	24155	477	604	24	3.97351	0.794812	865|2124|2177|3692|3976|4005|4015|4602|4860|5578|5701|5708|5718|5814|8364|10197|10234|23240|27086|64332|84695|114548|201163|284266	CBFB|EVI2B|FANCD2|EIF6|LIF|LMO2|LOX|MYB|PNP|PRKCA|PSMC2|PSMD2|PSMD12|PURB|H4C3|PSME3|LRRC17|TMEM131L|FOXP1|NFKBIZ|LOXL3|NLRP3|FLCN|SIGLEC15	-1.49271	0	38	0	0	-4.63681	6.66529
1	-2.8614	GO:0002286	M1	1	0	GO Biological Processes	19	T cell activation involved in immune response	-2.8614	3.39552	3.95834	24155	106	604	9	1.49007	0.492974	1880|2150|3569|4602|27086|64332|84695|114548|338376	GPR183|F2RL1|IL6|MYB|FOXP1|NFKBIZ|LOXL3|NLRP3|IFNE	-1.39634	0	38	0	0	-4.63681	6.66529
1	-2.81538	GO:0002292	M1	1	0	GO Biological Processes	19	T cell differentiation involved in immune response	-2.81538	4.11679	4.12173	24155	68	604	7	1.15894	0.435493	1880|3569|4602|27086|64332|84695|114548	GPR183|IL6|MYB|FOXP1|NFKBIZ|LOXL3|NLRP3	-1.35698	0	38	0	0	-4.63681	6.66529
1	-2.66658	GO:0035710	M1	1	0	GO Biological Processes	19	CD4-positive, alpha-beta T cell activation	-2.66658	3.47754	3.81284	24155	92	604	8	1.3245	0.465171	865|1880|3569|4602|27086|64332|84695|114548	CBFB|GPR183|IL6|MYB|FOXP1|NFKBIZ|LOXL3|NLRP3	-1.23778	0	38	0	0	-4.63681	6.66529
1	-2.65292	GO:0007159	M1	1	0	GO Biological Processes	19	leukocyte cell-cell adhesion	-2.65292	2.13606	3.36334	24155	337	604	18	2.98013	0.691878	865|960|3569|4602|4860|4907|5880|8379|8915|9306|10457|10808|23240|26191|64332|80380|84695|114548	CBFB|CD44|IL6|MYB|PNP|NT5E|RAC2|MAD1L1|BCL10|SOCS6|GPNMB|HSPH1|TMEM131L|PTPN22|NFKBIZ|PDCD1LG2|LOXL3|NLRP3	-1.23011	0	38	0	0	-4.63681	6.66529
1	-2.59655	GO:0050863	M1	1	0	GO Biological Processes	19	regulation of T cell activation	-2.59655	2.16516	3.32809	24155	314	604	17	2.81457	0.672958	865|2177|3569|4602|4860|5880|8379|8915|9306|10457|10808|23240|26191|64332|80380|84695|114548	CBFB|FANCD2|IL6|MYB|PNP|RAC2|MAD1L1|BCL10|SOCS6|GPNMB|HSPH1|TMEM131L|PTPN22|NFKBIZ|PDCD1LG2|LOXL3|NLRP3	-1.18803	0	38	0	0	-4.63681	6.66529
1	-2.55938	GO:0051249	M1	1	0	GO Biological Processes	19	regulation of lymphocyte activation	-2.55938	1.89651	3.19402	24155	485	604	23	3.80795	0.778747	865|1880|2177|3569|4602|4860|5880|6664|7468|8379|8915|9306|10457|10808|23240|23529|26191|51083|64332|80380|84695|114548|118460	CBFB|GPR183|FANCD2|IL6|MYB|PNP|RAC2|SOX11|NSD2|MAD1L1|BCL10|SOCS6|GPNMB|HSPH1|TMEM131L|CLCF1|PTPN22|GAL|NFKBIZ|PDCD1LG2|LOXL3|NLRP3|EXOSC6	-1.15709	0	38	0	0	-4.63681	6.66529
1	-2.51508	GO:0045785	M1	1	0	GO Biological Processes	19	positive regulation of cell adhesion	-2.51508	1.9847	3.19238	24155	403	604	20	3.31126	0.728058	865|960|3569|3655|3673|3987|4602|4860|5578|7052|8915|9289|10808|55612|57580|64332|80380|84978|114548|201163	CBFB|CD44|IL6|ITGA6|ITGA2|LIMS1|MYB|PNP|PRKCA|TGM2|BCL10|ADGRG1|HSPH1|FERMT1|PREX1|NFKBIZ|PDCD1LG2|FRMD5|NLRP3|FLCN	-1.12285	0	38	0	0	-4.63681	6.66529
1	-2.42756	GO:0072539	M1	1	0	GO Biological Processes	19	T-helper 17 cell differentiation	-2.42756	6.15257	4.20968	24155	26	604	4	0.662252	0.330028	3569|64332|84695|114548	IL6|NFKBIZ|LOXL3|NLRP3	-1.05986	0	38	0	0	-4.63681	6.66529
1	-2.35799	GO:1903037	M1	1	0	GO Biological Processes	19	regulation of leukocyte cell-cell adhesion	-2.35799	2.10483	3.10446	24155	304	604	16	2.64901	0.653421	865|960|3569|4602|4860|8379|8915|9306|10457|10808|23240|26191|64332|80380|84695|114548	CBFB|CD44|IL6|MYB|PNP|MAD1L1|BCL10|SOCS6|GPNMB|HSPH1|TMEM131L|PTPN22|NFKBIZ|PDCD1LG2|LOXL3|NLRP3	-1.00518	0	38	0	0	-4.63681	6.66529
1	-2.34889	GO:0046635	M1	1	0	GO Biological Processes	19	positive regulation of alpha-beta T cell activation	-2.34889	3.87017	3.62381	24155	62	604	6	0.993377	0.403525	865|4602|4860|10808|64332|114548	CBFB|MYB|PNP|HSPH1|NFKBIZ|NLRP3	-0.997965	0	38	0	0	-4.63681	6.66529
1	-2.3145	GO:0046637	M1	1	0	GO Biological Processes	19	regulation of alpha-beta T cell differentiation	-2.3145	3.80874	3.57481	24155	63	604	6	0.993377	0.403525	865|4602|4860|64332|84695|114548	CBFB|MYB|PNP|NFKBIZ|LOXL3|NLRP3	-0.970546	0	38	0	0	-4.63681	6.66529
1	-2.25216	GO:0072538	M1	1	0	GO Biological Processes	19	T-helper 17 type immune response	-2.25216	5.5161	3.89698	24155	29	604	4	0.662252	0.330028	3569|64332|84695|114548	IL6|NFKBIZ|LOXL3|NLRP3	-0.923175	0	38	0	0	-4.63681	6.66529
1	-2.20727	GO:0043370	M1	1	0	GO Biological Processes	19	regulation of CD4-positive, alpha-beta T cell differentiation	-2.20727	4.25444	3.57645	24155	47	604	5	0.827815	0.368674	865|4602|64332|84695|114548	CBFB|MYB|NFKBIZ|LOXL3|NLRP3	-0.891033	0	38	0	0	-4.63681	6.66529
1	-2.20727	GO:0046638	M1	1	0	GO Biological Processes	19	positive regulation of alpha-beta T cell differentiation	-2.20727	4.25444	3.57645	24155	47	604	5	0.827815	0.368674	865|4602|4860|64332|114548	CBFB|MYB|PNP|NFKBIZ|NLRP3	-0.891033	0	38	0	0	-4.63681	6.66529
1	-2.05635	GO:0046634	M1	1	0	GO Biological Processes	19	regulation of alpha-beta T cell activation	-2.05635	3.01013	3.11034	24155	93	604	7	1.15894	0.435493	865|4602|4860|10808|64332|84695|114548	CBFB|MYB|PNP|HSPH1|NFKBIZ|LOXL3|NLRP3	-0.775836	0	38	0	0	-4.63681	6.66529
1	-2.02787	GO:0002699	M1	1	0	GO Biological Processes	19	positive regulation of immune effector process	-2.02787	2.19133	2.83619	24155	219	604	12	1.98675	0.567801	2150|3569|4602|5817|5880|7468|8915|23529|23705|64332|114548|118460	F2RL1|IL6|MYB|PVR|RAC2|NSD2|BCL10|CLCF1|CADM1|NFKBIZ|NLRP3|EXOSC6	-0.751329	0	38	0	0	-4.63681	6.66529
1	-2.02296	GO:1902105	M1	1	0	GO Biological Processes	19	regulation of leukocyte differentiation	-2.02296	2.04337	2.78161	24155	274	604	14	2.31788	0.612258	865|2124|2177|3976|4602|4860|5578|10234|23240|27086|64332|84695|114548|284266	CBFB|EVI2B|FANCD2|LIF|MYB|PNP|PRKCA|LRRC17|TMEM131L|FOXP1|NFKBIZ|LOXL3|NLRP3|SIGLEC15	-0.748584	0	38	0	0	-4.63681	6.66529
1	-2.01796	GO:2000319	M1	1	0	GO Biological Processes	19	regulation of T-helper 17 cell differentiation	-2.01796	6.66529	3.85057	24155	18	604	3	0.496689	0.28605	64332|84695|114548	NFKBIZ|LOXL3|NLRP3	-0.746526	0	38	0	0	-4.63681	6.66529
1	-4.62979	M201	M1	1	0	Canonical Pathways	11	PID ERBB NETWORK PATHWAY	-4.62979	13.3306	7.65013	24155	15	604	5	0.827815	0.368674	1839|1956|3084|3320|7039	HBEGF|EGFR|NRG1|HSP90AA1|TGFA	-2.89318	0	39	1	1	-4.62979	19.9959
1	-4.35525	R-HSA-2179392	M1	1	0	Reactome Gene Sets	6	EGFR Transactivation by Gastrin	-4.35525	17.7741	8.06021	24155	9	604	4	0.662252	0.330028	1839|1956|4314|5578	HBEGF|EGFR|MMP3|PRKCA	-2.64409	0	39	0	0	-4.62979	19.9959
1	-4.18967	GO:0038127	M1	1	0	GO Biological Processes	19	ERBB signaling pathway	-4.18967	3.63561	5.06225	24155	143	604	13	2.15232	0.590487	1839|1956|3084|3320|3516|5329|5578|7039|9052|9125|10253|23636|79651	HBEGF|EGFR|NRG1|HSP90AA1|RBPJ|PLAUR|PRKCA|TGFA|GPRC5A|CNOT9|SPRY2|NUP62|RHBDF2	-2.50154	0	39	0	0	-4.62979	19.9959
1	-3.95357	GO:1901184	M1	1	0	GO Biological Processes	19	regulation of ERBB signaling pathway	-3.95357	4.30019	5.10649	24155	93	604	10	1.65563	0.519204	1839|1956|3516|5329|7039|9052|9125|10253|23636|79651	HBEGF|EGFR|RBPJ|PLAUR|TGFA|GPRC5A|CNOT9|SPRY2|NUP62|RHBDF2	-2.29499	0	39	0	0	-4.62979	19.9959
1	-3.5315	R-HSA-8857538	M1	1	0	Reactome Gene Sets	6	PTK6 promotes HIF1A stabilization	-3.5315	19.9959	7.45235	24155	6	604	3	0.496689	0.28605	1839|1956|10457	HBEGF|EGFR|GPNMB	-1.94555	0	39	0	0	-4.62979	19.9959
1	-3.5243	GO:0042058	M1	1	0	GO Biological Processes	19	regulation of epidermal growth factor receptor signaling pathway	-3.5243	4.18518	4.73874	24155	86	604	9	1.49007	0.492974	1839|1956|5329|7039|9052|9125|10253|23636|79651	HBEGF|EGFR|PLAUR|TGFA|GPRC5A|CNOT9|SPRY2|NUP62|RHBDF2	-1.94315	0	39	0	0	-4.62979	19.9959
1	-3.10064	R-HSA-5638302	M1	1	0	Reactome Gene Sets	6	Signaling by Overexpressed Wild-Type EGFR in Cancer	-3.10064	14.9969	6.34094	24155	8	604	3	0.496689	0.28605	1839|1956|7039	HBEGF|EGFR|TGFA	-1.58655	0	39	0	0	-4.62979	19.9959
1	-3.10064	R-HSA-5638303	M1	1	0	Reactome Gene Sets	6	Inhibition of Signaling by Overexpressed EGFR	-3.10064	14.9969	6.34094	24155	8	604	3	0.496689	0.28605	1839|1956|7039	HBEGF|EGFR|TGFA	-1.58655	0	39	0	0	-4.62979	19.9959
1	-3.09654	hsa01521	M1	1	0	KEGG Pathway	24	EGFR tyrosine kinase inhibitor resistance	-3.09654	4.04979	4.34811	24155	79	604	8	1.3245	0.465171	1956|2247|3082|3084|3569|5578|7039|56034	EGFR|FGF2|HGF|NRG1|IL6|PRKCA|TGFA|PDGFC	-1.58586	0	39	0	0	-4.62979	19.9959
1	-3.04777	R-HSA-881907	M1	1	0	Reactome Gene Sets	6	Gastrin-CREB signalling pathway via PKC and MAPK	-3.04777	8.88705	5.36065	24155	18	604	4	0.662252	0.330028	1839|1956|4314|5578	HBEGF|EGFR|MMP3|PRKCA	-1.54514	0	39	0	0	-4.62979	19.9959
1	-2.95588	GO:0038128	M1	1	0	GO Biological Processes	19	ERBB2 signaling pathway	-2.95588	6.24871	4.75795	24155	32	604	5	0.827815	0.368674	1839|1956|3084|3320|5578	HBEGF|EGFR|NRG1|HSP90AA1|PRKCA	-1.46957	0	39	0	0	-4.62979	19.9959
1	-2.93267	R-HSA-212718	M1	1	0	Reactome Gene Sets	6	EGFR interacts with phospholipase C-gamma	-2.93267	13.3306	5.92503	24155	9	604	3	0.496689	0.28605	1839|1956|7039	HBEGF|EGFR|TGFA	-1.45146	0	39	0	0	-4.62979	19.9959
1	-2.92121	GO:0042059	M1	1	0	GO Biological Processes	19	negative regulation of epidermal growth factor receptor signaling pathway	-2.92121	4.99897	4.44125	24155	48	604	6	0.993377	0.403525	1839|1956|7039|9052|10253|23636	HBEGF|EGFR|TGFA|GPRC5A|SPRY2|NUP62	-1.44189	0	39	0	0	-4.62979	19.9959
1	-2.89345	GO:1901186	M1	1	0	GO Biological Processes	19	positive regulation of ERBB signaling pathway	-2.89345	6.05935	4.65751	24155	33	604	5	0.827815	0.368674	3516|5329|7039|9125|23636	RBPJ|PLAUR|TGFA|CNOT9|NUP62	-1.41852	0	39	0	0	-4.62979	19.9959
1	-2.70369	R-HSA-1250196	M1	1	0	Reactome Gene Sets	6	SHC1 events in ERBB2 signaling	-2.70369	7.27122	4.71266	24155	22	604	4	0.662252	0.330028	1839|1956|3084|5578	HBEGF|EGFR|NRG1|PRKCA	-1.26415	0	39	0	0	-4.62979	19.9959
1	-2.69482	GO:1901185	M1	1	0	GO Biological Processes	19	negative regulation of ERBB signaling pathway	-2.69482	4.52736	4.1169	24155	53	604	6	0.993377	0.403525	1839|1956|7039|9052|10253|23636	HBEGF|EGFR|TGFA|GPRC5A|SPRY2|NUP62	-1.25867	0	39	0	0	-4.62979	19.9959
1	-2.69053	R-HSA-5663202	M1	1	0	Reactome Gene Sets	6	Diseases of signal transduction	-2.69053	2.05613	3.36296	24155	389	604	20	3.31126	0.728058	805|1839|1956|2247|2963|3082|3084|3320|3516|4000|5515|5701|5708|5718|5880|7039|10197|11116|55733|64840	CALM2|HBEGF|EGFR|FGF2|GTF2F2|HGF|NRG1|HSP90AA1|RBPJ|LMNA|PPP2CA|PSMC2|PSMD2|PSMD12|RAC2|TGFA|PSME3|FGFR1OP|HHAT|PORCN	-1.25551	0	39	0	0	-4.62979	19.9959
1	-2.56911	R-HSA-2219530	M1	1	0	Reactome Gene Sets	6	Constitutive Signaling by Aberrant PI3K in Cancer	-2.56911	3.73256	3.7956	24155	75	604	7	1.15894	0.435493	1839|1956|2247|3082|3084|5880|7039	HBEGF|EGFR|FGF2|HGF|NRG1|RAC2|TGFA	-1.16326	0	39	0	0	-4.62979	19.9959
1	-2.49155	R-HSA-1643713	M1	1	0	Reactome Gene Sets	6	Signaling by EGFR in Cancer	-2.49155	6.39868	4.32501	24155	25	604	4	0.662252	0.330028	1839|1956|3320|7039	HBEGF|EGFR|HSP90AA1|TGFA	-1.10577	0	39	0	0	-4.62979	19.9959
1	-2.49134	GO:0007173	M1	1	0	GO Biological Processes	19	epidermal growth factor receptor signaling pathway	-2.49134	2.99938	3.51619	24155	120	604	9	1.49007	0.492974	1839|1956|5329|7039|9052|9125|10253|23636|79651	HBEGF|EGFR|PLAUR|TGFA|GPRC5A|CNOT9|SPRY2|NUP62|RHBDF2	-1.10577	0	39	0	0	-4.62979	19.9959
1	-2.433	R-HSA-179812	M1	1	0	Reactome Gene Sets	6	GRB2 events in EGFR signaling	-2.433	9.22886	4.75262	24155	13	604	3	0.496689	0.28605	1839|1956|7039	HBEGF|EGFR|TGFA	-1.0629	0	39	0	0	-4.62979	19.9959
1	-2.433	R-HSA-8847993	M1	1	0	Reactome Gene Sets	6	ERBB2 Activates PTK6 Signaling	-2.433	9.22886	4.75262	24155	13	604	3	0.496689	0.28605	1839|1956|3084	HBEGF|EGFR|NRG1	-1.0629	0	39	0	0	-4.62979	19.9959
1	-2.36246	R-HSA-6811558	M1	1	0	Reactome Gene Sets	6	PI5P, PP2A and IER3 Regulate PI3K/AKT Signaling	-2.36246	3.10615	3.43037	24155	103	604	8	1.3245	0.465171	1839|1956|2247|3082|3084|5515|5880|7039	HBEGF|EGFR|FGF2|HGF|NRG1|PPP2CA|RAC2|TGFA	-1.00776	0	39	0	0	-4.62979	19.9959
1	-2.35799	R-HSA-9006925	M1	1	0	Reactome Gene Sets	6	Intracellular signaling by second messengers	-2.35799	2.10483	3.10446	24155	304	604	16	2.64901	0.653421	805|1839|1956|2146|2247|3082|3084|5515|5578|5701|5708|5718|5880|7039|10197|23512	CALM2|HBEGF|EGFR|EZH2|FGF2|HGF|NRG1|PPP2CA|PRKCA|PSMC2|PSMD2|PSMD12|RAC2|TGFA|PSME3|SUZ12	-1.00518	0	39	0	0	-4.62979	19.9959
1	-2.33635	R-HSA-180336	M1	1	0	Reactome Gene Sets	6	SHC1 events in EGFR signaling	-2.33635	8.56965	4.53702	24155	14	604	3	0.496689	0.28605	1839|1956|7039	HBEGF|EGFR|TGFA	-0.988222	0	39	0	0	-4.62979	19.9959
1	-2.25216	R-HSA-8863795	M1	1	0	Reactome Gene Sets	6	Downregulation of ERBB2 signaling	-2.25216	5.5161	3.89698	24155	29	604	4	0.662252	0.330028	1839|1956|3084|3320	HBEGF|EGFR|NRG1|HSP90AA1	-0.923175	0	39	0	0	-4.62979	19.9959
1	-2.2475	R-HSA-6785631	M1	1	0	Reactome Gene Sets	6	ERBB2 Regulates Cell Motility	-2.2475	7.99834	4.34191	24155	15	604	3	0.496689	0.28605	1839|1956|3084	HBEGF|EGFR|NRG1	-0.921632	0	39	0	0	-4.62979	19.9959
1	-2.19155	R-HSA-199418	M1	1	0	Reactome Gene Sets	6	Negative regulation of the PI3K/AKT network	-2.19155	2.90849	3.21279	24155	110	604	8	1.3245	0.465171	1839|1956|2247|3082|3084|5515|5880|7039	HBEGF|EGFR|FGF2|HGF|NRG1|PPP2CA|RAC2|TGFA	-0.878764	0	39	0	0	-4.62979	19.9959
1	-2.17692	R-HSA-449836	M1	1	0	Reactome Gene Sets	6	Other interleukin signaling	-2.17692	2.06854	2.93168	24155	290	604	15	2.48344	0.63321	805|1436|1839|1956|2247|3082|3084|5515|5701|5708|5718|6382|6804|7039|10197	CALM2|CSF1R|HBEGF|EGFR|FGF2|HGF|NRG1|PPP2CA|PSMC2|PSMD2|PSMD12|SDC1|STX1A|TGFA|PSME3	-0.867977	0	39	0	0	-4.62979	19.9959
1	-2.17135	R-HSA-1257604	M1	1	0	Reactome Gene Sets	6	PIP3 activates AKT signaling	-2.17135	2.12884	2.94775	24155	263	604	14	2.31788	0.612258	1839|1956|2146|2247|3082|3084|5515|5701|5708|5718|5880|7039|10197|23512	HBEGF|EGFR|EZH2|FGF2|HGF|NRG1|PPP2CA|PSMC2|PSMD2|PSMD12|RAC2|TGFA|PSME3|SUZ12	-0.862839	0	39	0	0	-4.62979	19.9959
1	-2.16538	R-HSA-1963640	M1	1	0	Reactome Gene Sets	6	GRB2 events in ERBB2 signaling	-2.16538	7.49845	4.16407	24155	16	604	3	0.496689	0.28605	1839|1956|3084	HBEGF|EGFR|NRG1	-0.861523	0	39	0	0	-4.62979	19.9959
1	-2.16538	R-HSA-1963642	M1	1	0	Reactome Gene Sets	6	PI3K events in ERBB2 signaling	-2.16538	7.49845	4.16407	24155	16	604	3	0.496689	0.28605	1839|1956|3084	HBEGF|EGFR|NRG1	-0.861523	0	39	0	0	-4.62979	19.9959
1	-2.14706	GO:0045742	M1	1	0	GO Biological Processes	19	positive regulation of epidermal growth factor receptor signaling pathway	-2.14706	5.16022	3.71177	24155	31	604	4	0.662252	0.330028	5329|7039|9125|23636	PLAUR|TGFA|CNOT9|NUP62	-0.848638	0	39	0	0	-4.62979	19.9959
1	-2.14706	R-HSA-182971	M1	1	0	Reactome Gene Sets	6	EGFR downregulation	-2.14706	5.16022	3.71177	24155	31	604	4	0.662252	0.330028	1839|1956|7039|10253	HBEGF|EGFR|TGFA|SPRY2	-0.848638	0	39	0	0	-4.62979	19.9959
1	-2.09347	R-HSA-1227986	M1	1	0	Reactome Gene Sets	6	Signaling by ERBB2	-2.09347	3.99917	3.3997	24155	50	604	5	0.827815	0.368674	1839|1956|3084|3320|5578	HBEGF|EGFR|NRG1|HSP90AA1|PRKCA	-0.804908	0	39	0	0	-4.62979	19.9959
1	-2.08911	R-HSA-180292	M1	1	0	Reactome Gene Sets	6	GAB1 signalosome	-2.08911	7.05736	4.00097	24155	17	604	3	0.496689	0.28605	1839|1956|7039	HBEGF|EGFR|TGFA	-0.803783	0	39	0	0	-4.62979	19.9959
1	-4.60183	CORUM:1149	M1	1	0	CORUM	33	Histone H3.1 complex	-4.60183	19.9959	8.60559	24155	8	604	4	0.662252	0.330028	4678|8208|10036|55723	NASP|CHAF1B|CHAF1A|ASF1B	-2.87087	0	40	1	1	-4.60183	23.995
1	-3.82437	CORUM:2235	M1	1	0	CORUM	33	ASF1-interacting protein complex	-3.82437	23.995	8.2351	24155	5	604	3	0.496689	0.28605	8208|10036|55723	CHAF1B|CHAF1A|ASF1B	-2.18169	0	40	0	0	-4.60183	23.995
1	-3.5315	CORUM:2236	M1	1	0	CORUM	33	ASF1-histone containing complex	-3.5315	19.9959	7.45235	24155	6	604	3	0.496689	0.28605	4678|8208|55723	NASP|CHAF1B|ASF1B	-1.94555	0	40	0	0	-4.60183	23.995
1	-2.95588	GO:0006335	M1	1	0	GO Biological Processes	19	DNA replication-dependent nucleosome assembly	-2.95588	6.24871	4.75795	24155	32	604	5	0.827815	0.368674	4678|8208|8364|10036|55723	NASP|CHAF1B|H4C3|CHAF1A|ASF1B	-1.46957	0	40	0	0	-4.60183	23.995
1	-2.95588	GO:0034723	M1	1	0	GO Biological Processes	19	DNA replication-dependent nucleosome organization	-2.95588	6.24871	4.75795	24155	32	604	5	0.827815	0.368674	4678|8208|8364|10036|55723	NASP|CHAF1B|H4C3|CHAF1A|ASF1B	-1.46957	0	40	0	0	-4.60183	23.995
1	-4.53627	GO:0031109	M1	1	0	GO Biological Processes	19	microtubule polymerization or depolymerization	-4.53627	4.20965	5.50102	24155	114	604	12	1.98675	0.567801	3925|7283|7756|9793|9928|10982|26586|220134|221150|344148|347240|440145	STMN1|TUBG1|ZNF207|CKAP5|KIF14|MAPRE2|CKAP2|SKA1|SKA3|NCKAP5|KIF24|MZT1	-2.81091	0	41	1	1	-4.53627	5.33223
1	-3.35394	GO:0051261	M1	1	0	GO Biological Processes	19	protein depolymerization	-3.35394	3.63561	4.43684	24155	110	604	10	1.65563	0.519204	120|2150|3925|9645|9793|9928|10763|26586|344148|347240	ADD3|F2RL1|STMN1|MICAL2|CKAP5|KIF14|NES|CKAP2|NCKAP5|KIF24	-1.79151	0	41	0	0	-4.53627	5.33223
1	-3.07178	GO:0007019	M1	1	0	GO Biological Processes	19	microtubule depolymerization	-3.07178	5.33223	4.6583	24155	45	604	6	0.993377	0.403525	3925|9793|9928|26586|344148|347240	STMN1|CKAP5|KIF14|CKAP2|NCKAP5|KIF24	-1.56581	0	41	0	0	-4.53627	5.33223
1	-2.04272	GO:0043624	M1	1	0	GO Biological Processes	19	cellular protein complex disassembly	-2.04272	2.20138	2.85353	24155	218	604	12	1.98675	0.567801	120|2150|3925|9645|9793|9928|10763|26586|63875|64928|344148|347240	ADD3|F2RL1|STMN1|MICAL2|CKAP5|KIF14|NES|CKAP2|MRPL17|MRPL14|NCKAP5|KIF24	-0.76539	0	41	0	0	-4.53627	5.33223
1	-4.5194	GO:0006997	M1	1	0	GO Biological Processes	19	nucleus organization	-4.5194	3.90897	5.38726	24155	133	604	13	2.15232	0.590487	274|891|4000|5515|5578|8444|8815|9631|10436|23165|51280|55165|55706	BIN1|CCNB1|LMNA|PPP2CA|PRKCA|DYRK3|BANF1|NUP155|EMG1|NUP205|GOLM1|CEP55|NDC1	-2.79625	0	42	1	1	-4.5194	12.3051
1	-3.636	R-HSA-2995383	M1	1	0	Reactome Gene Sets	6	Initiation of Nuclear Envelope Reformation	-3.636	12.3051	6.52934	24155	13	604	4	0.662252	0.330028	4000|5515|7112|8815	LMNA|PPP2CA|TMPO|BANF1	-2.02857	0	42	0	0	-4.5194	12.3051
1	-3.636	R-HSA-2995410	M1	1	0	Reactome Gene Sets	6	Nuclear Envelope Reassembly	-3.636	12.3051	6.52934	24155	13	604	4	0.662252	0.330028	4000|5515|7112|8815	LMNA|PPP2CA|TMPO|BANF1	-2.02857	0	42	0	0	-4.5194	12.3051
1	-3.37247	R-HSA-4419969	M1	1	0	Reactome Gene Sets	6	Depolymerisation of the Nuclear Lamina	-3.37247	10.6645	5.99602	24155	15	604	4	0.662252	0.330028	891|4000|5578|7112	CCNB1|LMNA|PRKCA|TMPO	-1.80698	0	42	0	0	-4.5194	12.3051
1	-2.78589	GO:0007084	M1	1	0	GO Biological Processes	19	mitotic nuclear envelope reassembly	-2.78589	11.9975	5.57044	24155	10	604	3	0.496689	0.28605	4000|5515|8815	LMNA|PPP2CA|BANF1	-1.33286	0	42	0	0	-4.5194	12.3051
1	-2.73789	GO:0006998	M1	1	0	GO Biological Processes	19	nuclear envelope organization	-2.73789	4.61443	4.17844	24155	52	604	6	0.993377	0.403525	891|4000|5515|5578|8815|9631	CCNB1|LMNA|PPP2CA|PRKCA|BANF1|NUP155	-1.29425	0	42	0	0	-4.5194	12.3051
1	-2.01796	GO:0031468	M1	1	0	GO Biological Processes	19	nuclear envelope reassembly	-2.01796	6.66529	3.85057	24155	18	604	3	0.496689	0.28605	4000|5515|8815	LMNA|PPP2CA|BANF1	-0.746526	0	42	0	0	-4.5194	12.3051
1	-4.34371	GO:0048661	M1	1	0	GO Biological Processes	19	positive regulation of smooth muscle cell proliferation	-4.34371	4.35553	5.41174	24155	101	604	11	1.82119	0.544087	231|1786|1839|1956|2247|3569|3673|4602|5743|7052|27086	AKR1B1|DNMT1|HBEGF|EGFR|FGF2|IL6|ITGA2|MYB|PTGS2|TGM2|FOXP1	-2.63576	0	43	1	1	-4.34371	4.54451
1	-3.20086	GO:0032963	M1	1	0	GO Biological Processes	19	collagen metabolic process	-3.20086	3.47754	4.26492	24155	115	604	10	1.65563	0.519204	1305|1306|2022|3569|3673|4314|4319|4325|4602|5467	COL13A1|COL15A1|ENG|IL6|ITGA2|MMP3|MMP10|MMP16|MYB|PPARD	-1.66363	0	43	0	0	-4.34371	4.54451
1	-2.97127	GO:0033002	M1	1	0	GO Biological Processes	19	muscle cell proliferation	-2.97127	2.50994	3.75684	24155	239	604	15	2.48344	0.63321	231|891|1786|1839|1956|2247|3516|3569|3673|3776|4602|5467|5743|7052|27086	AKR1B1|CCNB1|DNMT1|HBEGF|EGFR|FGF2|RBPJ|IL6|ITGA2|KCNK2|MYB|PPARD|PTGS2|TGM2|FOXP1	-1.47989	0	43	0	0	-4.34371	4.54451
1	-2.93522	GO:0048660	M1	1	0	GO Biological Processes	19	regulation of smooth muscle cell proliferation	-2.93522	2.83965	3.84333	24155	169	604	12	1.98675	0.567801	231|1786|1839|1956|2247|3569|3673|4602|5467|5743|7052|27086	AKR1B1|DNMT1|HBEGF|EGFR|FGF2|IL6|ITGA2|MYB|PPARD|PTGS2|TGM2|FOXP1	-1.45146	0	43	0	0	-4.34371	4.54451
1	-2.89127	GO:0048659	M1	1	0	GO Biological Processes	19	smooth muscle cell proliferation	-2.89127	2.80644	3.79637	24155	171	604	12	1.98675	0.567801	231|1786|1839|1956|2247|3569|3673|4602|5467|5743|7052|27086	AKR1B1|DNMT1|HBEGF|EGFR|FGF2|IL6|ITGA2|MYB|PPARD|PTGS2|TGM2|FOXP1	-1.41696	0	43	0	0	-4.34371	4.54451
1	-2.33072	GO:0032965	M1	1	0	GO Biological Processes	19	regulation of collagen biosynthetic process	-2.33072	4.54451	3.76863	24155	44	604	5	0.827815	0.368674	2022|3569|3673|4602|5467	ENG|IL6|ITGA2|MYB|PPARD	-0.98306	0	43	0	0	-4.34371	4.54451
1	-2.13041	GO:0010712	M1	1	0	GO Biological Processes	19	regulation of collagen metabolic process	-2.13041	4.08079	3.45705	24155	49	604	5	0.827815	0.368674	2022|3569|3673|4602|5467	ENG|IL6|ITGA2|MYB|PPARD	-0.836945	0	43	0	0	-4.34371	4.54451
1	-2.05635	GO:0033273	M1	1	0	GO Biological Processes	19	response to vitamin	-2.05635	3.01013	3.11034	24155	93	604	7	1.15894	0.435493	1956|3673|5251|5467|5743|6427|7298	EGFR|ITGA2|PHEX|PPARD|PTGS2|SRSF2|TYMS	-0.775836	0	43	0	0	-4.34371	4.54451
1	-4.24366	GO:0006282	M1	1	0	GO Biological Processes	19	regulation of DNA repair	-4.24366	3.93361	5.2022	24155	122	604	12	1.98675	0.567801	672|1956|2305|3014|5111|7468|8091|8914|10635|10721|51750|79000	BRCA1|EGFR|FOXM1|H2AX|PCNA|NSD2|HMGA2|TIMELESS|RAD51AP1|POLQ|RTEL1|AUNIP	-2.54521	0	44	1	1	-4.24366	4.15498
1	-3.98284	GO:2001020	M1	1	0	GO Biological Processes	19	regulation of response to DNA damage stimulus	-3.98284	2.99004	4.68279	24155	214	604	16	2.64901	0.653421	672|960|1956|2305|3014|5111|7468|8091|8444|8914|10635|10721|51750|79000|79968|83596	BRCA1|CD44|EGFR|FOXM1|H2AX|PCNA|NSD2|HMGA2|DYRK3|TIMELESS|RAD51AP1|POLQ|RTEL1|AUNIP|WDR76|BCL2L12	-2.32012	0	44	0	0	-4.24366	4.15498
1	-3.17102	GO:2000779	M1	1	0	GO Biological Processes	19	regulation of double-strand break repair	-3.17102	4.15498	4.44059	24155	77	604	8	1.3245	0.465171	2305|7468|8091|8914|10635|10721|51750|79000	FOXM1|NSD2|HMGA2|TIMELESS|RAD51AP1|POLQ|RTEL1|AUNIP	-1.64033	0	44	0	0	-4.24366	4.15498
1	-3.10466	GO:0000726	M1	1	0	GO Biological Processes	19	non-recombinational repair	-3.10466	3.67271	4.24573	24155	98	604	9	1.49007	0.492974	672|3014|5422|5932|7468|8091|8364|10721|79000	BRCA1|H2AX|POLA1|RBBP8|NSD2|HMGA2|H4C3|POLQ|AUNIP	-1.58655	0	44	0	0	-4.24366	4.15498
1	-2.72725	GO:0006303	M1	1	0	GO Biological Processes	19	double-strand break repair via nonhomologous end joining	-2.72725	3.55482	3.88863	24155	90	604	8	1.3245	0.465171	672|3014|5422|7468|8091|8364|10721|79000	BRCA1|H2AX|POLA1|NSD2|HMGA2|H4C3|POLQ|AUNIP	-1.28419	0	44	0	0	-4.24366	4.15498
1	-2.3811	GO:2001021	M1	1	0	GO Biological Processes	19	negative regulation of response to DNA damage stimulus	-2.3811	3.45607	3.54583	24155	81	604	7	1.15894	0.435493	960|8091|8444|10721|51750|79000|83596	CD44|HMGA2|DYRK3|POLQ|RTEL1|AUNIP|BCL2L12	-1.02164	0	44	0	0	-4.24366	4.15498
1	-2.24781	GO:0045739	M1	1	0	GO Biological Processes	19	positive regulation of DNA repair	-2.24781	3.69154	3.47975	24155	65	604	6	0.993377	0.403525	672|1956|2305|3014|5111|8914	BRCA1|EGFR|FOXM1|H2AX|PCNA|TIMELESS	-0.921632	0	44	0	0	-4.24366	4.15498
1	-4.22122	GO:0001837	M1	1	0	GO Biological Processes	19	epithelial to mesenchymal transition	-4.22122	3.66121	5.09342	24155	142	604	13	2.15232	0.590487	2022|2146|3082|3182|3516|3569|3987|5515|7074|8091|25937|26585|84695	ENG|EZH2|HGF|HNRNPAB|RBPJ|IL6|LIMS1|PPP2CA|TIAM1|HMGA2|WWTR1|GREM1|LOXL3	-2.52381	0	45	1	1	-4.22122	3.99917
1	-3.82062	GO:0048762	M1	1	0	GO Biological Processes	19	mesenchymal cell differentiation	-3.82062	2.89533	4.53295	24155	221	604	16	2.64901	0.653421	2022|2146|3082|3084|3182|3516|3569|3987|5515|6664|7074|8091|10371|25937|26585|84695	ENG|EZH2|HGF|NRG1|HNRNPAB|RBPJ|IL6|LIMS1|PPP2CA|SOX11|TIAM1|HMGA2|SEMA3A|WWTR1|GREM1|LOXL3	-2.17885	0	45	0	0	-4.22122	3.99917
1	-3.14709	GO:0060485	M1	1	0	GO Biological Processes	19	mesenchyme development	-3.14709	2.43677	3.8656	24155	279	604	17	2.81457	0.672958	2022|2146|3082|3084|3182|3516|3569|3987|5515|6664|7074|8091|10371|10683|25937|26585|84695	ENG|EZH2|HGF|NRG1|HNRNPAB|RBPJ|IL6|LIMS1|PPP2CA|SOX11|TIAM1|HMGA2|SEMA3A|DLL3|WWTR1|GREM1|LOXL3	-1.62124	0	45	0	0	-4.22122	3.99917
1	-2.13189	GO:0010717	M1	1	0	GO Biological Processes	19	regulation of epithelial to mesenchymal transition	-2.13189	3.11047	3.21229	24155	90	604	7	1.15894	0.435493	2022|2146|3569|5515|7074|25937|26585	ENG|EZH2|IL6|PPP2CA|TIAM1|WWTR1|GREM1	-0.836945	0	45	0	0	-4.22122	3.99917
1	-2.09347	GO:0010718	M1	1	0	GO Biological Processes	19	positive regulation of epithelial to mesenchymal transition	-2.09347	3.99917	3.3997	24155	50	604	5	0.827815	0.368674	2022|2146|3569|7074|25937	ENG|EZH2|IL6|TIAM1|WWTR1	-0.804908	0	45	0	0	-4.22122	3.99917
1	-4.21414	CORUM:190	M1	1	0	CORUM	33	Mitotic checkpoint complex (MCC)	-4.21414	29.9938	9.28701	24155	4	604	3	0.496689	0.28605	701|4085|9184	BUB1B|MAD2L1|BUB3	-2.51881	0	46	1	1	-4.21414	29.9938
1	-2.27144	hsa05166	M1	1	0	KEGG Pathway	24	HTLV-I infection	-2.27144	2.18705	3.05778	24155	256	604	14	2.31788	0.612258	701|3569|4085|4602|5111|5424|5426|5427|5902|7477|8061|9184|9232|10714	BUB1B|IL6|MAD2L1|MYB|PCNA|POLD1|POLE|POLE2|RANBP1|WNT7B|FOSL1|BUB3|PTTG1|POLD3	-0.934812	0	46	0	0	-4.21414	29.9938
1	-4.20579	GO:0051345	M1	1	0	GO Biological Processes	19	positive regulation of hydrolase activity	-4.20579	1.97106	4.38855	24155	771	604	38	6.29139	0.987972	627|805|1794|1956|2146|2150|2247|2956|3655|3673|3987|5111|5902|7074|8797|8853|8915|9610|9754|9912|10197|10276|10483|10762|10982|23234|26097|26575|27429|29127|29128|55114|55619|57580|57706|79890|114548|201163	BDNF|CALM2|DOCK2|EGFR|EZH2|F2RL1|FGF2|MSH6|ITGA6|ITGA2|LIMS1|PCNA|RANBP1|TIAM1|TNFRSF10A|ASAP2|BCL10|RIN1|STARD8|ARHGAP44|PSME3|NET1|SEC23B|NUP50|MAPRE2|DNAJC9|CHTOP|RGS17|HTRA2|RACGAP1|UHRF1|ARHGAP17|DOCK10|PREX1|DENND1A|RIN3|NLRP3|FLCN	-2.5115	0	47	1	1	-4.20579	2.27113
1	-4.07473	GO:0043087	M1	1	0	GO Biological Processes	19	regulation of GTPase activity	-4.07473	2.25423	4.44017	24155	479	604	27	4.4702	0.840842	1794|2044|2146|2150|3655|3987|5902|7074|8853|9353|9610|9754|9912|10253|10276|10483|10762|10982|26575|29127|55114|55619|57580|57706|79890|154796|201163	DOCK2|EPHA5|EZH2|F2RL1|ITGA6|LIMS1|RANBP1|TIAM1|ASAP2|SLIT2|RIN1|STARD8|ARHGAP44|SPRY2|NET1|SEC23B|NUP50|MAPRE2|RGS17|RACGAP1|ARHGAP17|DOCK10|PREX1|DENND1A|RIN3|AMOT|FLCN	-2.40359	0	47	0	0	-4.20579	2.27113
1	-3.60442	GO:0043547	M1	1	0	GO Biological Processes	19	positive regulation of GTPase activity	-3.60442	2.27113	4.13138	24155	405	604	23	3.80795	0.778747	1794|2146|2150|3655|3987|5902|7074|8853|9610|9754|9912|10276|10483|10762|10982|26575|29127|55114|55619|57580|57706|79890|201163	DOCK2|EZH2|F2RL1|ITGA6|LIMS1|RANBP1|TIAM1|ASAP2|RIN1|STARD8|ARHGAP44|NET1|SEC23B|NUP50|MAPRE2|RGS17|RACGAP1|ARHGAP17|DOCK10|PREX1|DENND1A|RIN3|FLCN	-2.00093	0	47	0	0	-4.20579	2.27113
1	-4.1875	GO:0033138	M1	1	0	GO Biological Processes	19	positive regulation of peptidyl-serine phosphorylation	-4.1875	4.18961	5.24545	24155	105	604	11	1.82119	0.544087	960|1956|3320|3569|3589|3976|5743|9125|10253|65981|338376	CD44|EGFR|HSP90AA1|IL6|IL11|LIF|PTGS2|CNOT9|SPRY2|CAPRIN2|IFNE	-2.50039	0	48	1	1	-4.1875	4.18961
1	-3.6997	GO:0033135	M1	1	0	GO Biological Processes	19	regulation of peptidyl-serine phosphorylation	-3.6997	3.45252	4.64385	24155	139	604	12	1.98675	0.567801	960|1956|3082|3320|3569|3589|3976|5743|9125|10253|65981|338376	CD44|EGFR|HGF|HSP90AA1|IL6|IL11|LIF|PTGS2|CNOT9|SPRY2|CAPRIN2|IFNE	-2.07939	0	48	0	0	-4.1875	4.18961
1	-3.23687	GO:0018105	M1	1	0	GO Biological Processes	19	peptidyl-serine phosphorylation	-3.23687	2.40753	3.92195	24155	299	604	18	2.98013	0.691878	891|960|1956|3082|3320|3569|3589|3976|5578|5743|6446|8091|8444|9125|10253|55351|65981|338376	CCNB1|CD44|EGFR|HGF|HSP90AA1|IL6|IL11|LIF|PRKCA|PTGS2|SGK1|HMGA2|DYRK3|CNOT9|SPRY2|STK32B|CAPRIN2|IFNE	-1.69384	0	48	0	0	-4.1875	4.18961
1	-2.86961	GO:0018209	M1	1	0	GO Biological Processes	19	peptidyl-serine modification	-2.86961	2.23556	3.57447	24155	322	604	18	2.98013	0.691878	891|960|1956|3082|3320|3569|3589|3976|5578|5743|6446|8091|8444|9125|10253|55351|65981|338376	CCNB1|CD44|EGFR|HGF|HSP90AA1|IL6|IL11|LIF|PRKCA|PTGS2|SGK1|HMGA2|DYRK3|CNOT9|SPRY2|STK32B|CAPRIN2|IFNE	-1.40085	0	48	0	0	-4.1875	4.18961
1	-2.23878	R-HSA-6785807	M1	1	0	Reactome Gene Sets	6	Interleukin-4 and Interleukin-13 signaling	-2.23878	2.96235	3.27315	24155	108	604	8	1.3245	0.465171	332|2247|3082|3320|3569|3976|4314|5743	BIRC5|FGF2|HGF|HSP90AA1|IL6|LIF|MMP3|PTGS2	-0.915002	0	48	0	0	-4.1875	4.18961
1	-2.05635	hsa04657	M1	1	0	KEGG Pathway	24	IL-17 signaling pathway	-2.05635	3.01013	3.11034	24155	93	604	7	1.15894	0.435493	2354|3320|3569|4314|5743|6426|8061	FOSB|HSP90AA1|IL6|MMP3|PTGS2|SRSF1|FOSL1	-0.775836	0	48	0	0	-4.1875	4.18961
1	-4.17448	hsa04114	M1	1	0	KEGG Pathway	24	Oocyte meiosis	-4.17448	3.87017	5.13145	24155	124	604	12	1.98675	0.567801	699|805|891|4085|5515|7534|9088|9126|9232|10971|64506|151648	BUB1|CALM2|CCNB1|MAD2L1|PPP2CA|YWHAZ|PKMYT1|SMC3|PTTG1|YWHAQ|CPEB1|SGO1	-2.48838	0	49	1	1	-4.17448	3.87017
1	-3.1697	hsa04914	M1	1	0	KEGG Pathway	24	Progesterone-mediated oocyte maturation	-3.1697	3.74922	4.3223	24155	96	604	9	1.49007	0.492974	699|891|993|994|3320|4085|8379|9088|64506	BUB1|CCNB1|CDC25A|CDC25B|HSP90AA1|MAD2L1|MAD1L1|PKMYT1|CPEB1	-1.64033	0	49	0	0	-4.17448	3.87017
1	-4.13773	GO:0070507	M1	1	0	GO Biological Processes	19	regulation of microtubule cytoskeleton organization	-4.13773	3.22514	4.87862	24155	186	604	15	2.48344	0.63321	636|672|3832|3925|5902|9126|10460|10615|10733|10982|22974|23636|26586|220134|221150	BICD1|BRCA1|KIF11|STMN1|RANBP1|SMC3|TACC3|SPAG5|PLK4|MAPRE2|TPX2|NUP62|CKAP2|SKA1|SKA3	-2.45668	0	50	1	1	-4.13773	4.6502
1	-4.04831	GO:0051493	M1	1	0	GO Biological Processes	19	regulation of cytoskeleton organization	-4.04831	2.17184	4.38527	24155	534	604	29	4.80132	0.869916	120|274|636|672|1436|2044|2150|3832|3925|5902|9126|9353|9912|10458|10460|10552|10615|10733|10763|10982|11013|22974|23636|26586|55114|57580|220134|221150|284266	ADD3|BIN1|BICD1|BRCA1|CSF1R|EPHA5|F2RL1|KIF11|STMN1|RANBP1|SMC3|SLIT2|ARHGAP44|BAIAP2|TACC3|ARPC1A|SPAG5|PLK4|NES|MAPRE2|TMSB15A|TPX2|NUP62|CKAP2|ARHGAP17|PREX1|SKA1|SKA3|SIGLEC15	-2.37913	0	50	0	0	-4.13773	4.6502
1	-3.8892	GO:0032886	M1	1	0	GO Biological Processes	19	regulation of microtubule-based process	-3.8892	2.93517	4.59644	24155	218	604	16	2.64901	0.653421	636|672|3832|3925|5902|9126|10460|10615|10733|10982|22974|23636|26586|56683|220134|221150	BICD1|BRCA1|KIF11|STMN1|RANBP1|SMC3|TACC3|SPAG5|PLK4|MAPRE2|TPX2|NUP62|CKAP2|CFAP298|SKA1|SKA3	-2.23818	0	50	0	0	-4.13773	4.6502
1	-2.61173	GO:0044380	M1	1	0	GO Biological Processes	19	protein localization to cytoskeleton	-2.61173	4.36273	3.99828	24155	55	604	6	0.993377	0.403525	636|10615|10982|23636|54443|58489	BICD1|SPAG5|MAPRE2|NUP62|ANLN|ABHD17C	-1.20106	0	50	0	0	-4.13773	4.6502
1	-2.37425	GO:0090224	M1	1	0	GO Biological Processes	19	regulation of spindle organization	-2.37425	4.6502	3.83657	24155	43	604	5	0.827815	0.368674	9126|10460|10615|22974|23636	SMC3|TACC3|SPAG5|TPX2|NUP62	-1.01671	0	50	0	0	-4.13773	4.6502
1	-2.09347	GO:0072698	M1	1	0	GO Biological Processes	19	protein localization to microtubule cytoskeleton	-2.09347	3.99917	3.3997	24155	50	604	5	0.827815	0.368674	636|10615|10982|23636|58489	BICD1|SPAG5|MAPRE2|NUP62|ABHD17C	-0.804908	0	50	0	0	-4.13773	4.6502
1	-4.11449	GO:0001503	M1	1	0	GO Biological Processes	19	ossification	-4.11449	2.40552	4.53361	24155	399	604	24	3.97351	0.794812	865|1305|1956|2131|3082|3516|3569|4015|4325|5251|5701|5743|5744|6664|7477|8200|10234|10457|10492|25937|26585|55366|56172|56975	CBFB|COL13A1|EGFR|EXT1|HGF|RBPJ|IL6|LOX|MMP16|PHEX|PSMC2|PTGS2|PTHLH|SOX11|WNT7B|GDF5|LRRC17|GPNMB|SYNCRIP|WWTR1|GREM1|LGR4|ANKH|FAM20C	-2.43941	0	51	1	1	-4.11449	3.15724
1	-3.52566	GO:0001501	M1	1	0	GO Biological Processes	19	skeletal system development	-3.52566	2.08451	3.99587	24155	518	604	27	4.4702	0.840842	960|1305|1745|2022|2131|2247|4015|4147|4325|5251|5744|6664|7298|7468|7477|8091|8200|10234|10683|26585|27086|56034|56172|56975|64651|64764|284266	CD44|COL13A1|DLX1|ENG|EXT1|FGF2|LOX|MATN2|MMP16|PHEX|PTHLH|SOX11|TYMS|NSD2|WNT7B|HMGA2|GDF5|LRRC17|DLL3|GREM1|FOXP1|PDGFC|ANKH|FAM20C|CSRNP1|CREB3L2|SIGLEC15	-1.94315	0	51	0	0	-4.11449	3.15724
1	-3.2189	GO:0001649	M1	1	0	GO Biological Processes	19	osteoblast differentiation	-3.2189	2.65432	4.00147	24155	226	604	15	2.48344	0.63321	865|3082|3569|4015|5701|5744|6664|7477|10234|10457|10492|25937|26585|55366|56975	CBFB|HGF|IL6|LOX|PSMC2|PTHLH|SOX11|WNT7B|LRRC17|GPNMB|SYNCRIP|WWTR1|GREM1|LGR4|FAM20C	-1.67879	0	51	0	0	-4.11449	3.15724
1	-2.64213	GO:0030282	M1	1	0	GO Biological Processes	19	bone mineralization	-2.64213	3.15724	3.69729	24155	114	604	9	1.49007	0.492974	4015|5251|5743|5744|10457|26585|55366|56172|56975	LOX|PHEX|PTGS2|PTHLH|GPNMB|GREM1|LGR4|ANKH|FAM20C	-1.22222	0	51	0	0	-4.11449	3.15724
1	-2.56304	GO:0031214	M1	1	0	GO Biological Processes	19	biomineral tissue development	-2.56304	2.69883	3.48512	24155	163	604	11	1.82119	0.544087	4015|5251|5743|5744|5818|6574|10457|26585|55366|56172|56975	LOX|PHEX|PTGS2|PTHLH|NECTIN1|SLC20A1|GPNMB|GREM1|LGR4|ANKH|FAM20C	-1.15878	0	51	0	0	-4.11449	3.15724
1	-2.47463	GO:0060348	M1	1	0	GO Biological Processes	19	bone development	-2.47463	2.39582	3.30768	24155	217	604	13	2.15232	0.590487	1305|2022|4015|4147|4325|5251|7468|10234|26585|27086|56034|56975|284266	COL13A1|ENG|LOX|MATN2|MMP16|PHEX|NSD2|LRRC17|GREM1|FOXP1|PDGFC|FAM20C|SIGLEC15	-1.09063	0	51	0	0	-4.11449	3.15724
1	-4.02844	R-HSA-2299718	M1	1	0	Reactome Gene Sets	6	Condensation of Prophase Chromosomes	-4.02844	4.86386	5.33099	24155	74	604	9	1.49007	0.492974	891|3014|3015|8364|10051|10592|23310|29781|94239	CCNB1|H2AX|H2AZ1|H4C3|SMC4|SMC2|NCAPD3|NCAPH2|H2AZ2	-2.36411	0	52	1	1	-4.02844	4.86386
1	-3.72971	R-HSA-1500620	M1	1	0	Reactome Gene Sets	6	Meiosis	-3.72971	3.72804	4.7573	24155	118	604	11	1.82119	0.544087	672|3014|3015|4000|5932|6117|8364|9126|29893|84057|94239	BRCA1|H2AX|H2AZ1|LMNA|RBBP8|RPA1|H4C3|SMC3|PSMC3IP|MND1|H2AZ2	-2.10619	0	52	0	0	-4.02844	4.86386
1	-3.5243	R-HSA-912446	M1	1	0	Reactome Gene Sets	6	Meiotic recombination	-3.5243	4.18518	4.73874	24155	86	604	9	1.49007	0.492974	672|3014|3015|5932|6117|8364|29893|84057|94239	BRCA1|H2AX|H2AZ1|RBBP8|RPA1|H4C3|PSMC3IP|MND1|H2AZ2	-1.94315	0	52	0	0	-4.02844	4.86386
1	-3.38111	R-HSA-9006931	M1	1	0	Reactome Gene Sets	6	Signaling by Nuclear Receptors	-3.38111	2.55586	4.08621	24155	266	604	17	2.81457	0.672958	805|865|1382|1839|1956|2354|2963|3014|3015|3320|4314|4602|5467|7039|8364|9126|94239	CALM2|CBFB|CRABP2|HBEGF|EGFR|FOSB|GTF2F2|H2AX|H2AZ1|HSP90AA1|MMP3|MYB|PPARD|TGFA|H4C3|SMC3|H2AZ2	-1.8133	0	52	0	0	-4.02844	4.86386
1	-3.27919	R-HSA-8939211	M1	1	0	Reactome Gene Sets	6	ESR-mediated signaling	-3.27919	2.69003	4.06036	24155	223	604	15	2.48344	0.63321	805|865|1839|1956|2354|2963|3014|3015|3320|4314|4602|7039|8364|9126|94239	CALM2|CBFB|HBEGF|EGFR|FOSB|GTF2F2|H2AX|H2AZ1|HSP90AA1|MMP3|MYB|TGFA|H4C3|SMC3|H2AZ2	-1.7288	0	52	0	0	-4.02844	4.86386
1	-2.99197	R-HSA-1474165	M1	1	0	Reactome Gene Sets	6	Reproduction	-2.99197	3.05492	3.96077	24155	144	604	11	1.82119	0.544087	672|3014|3015|4000|5932|6117|8364|9126|29893|84057|94239	BRCA1|H2AX|H2AZ1|LMNA|RBBP8|RPA1|H4C3|SMC3|PSMC3IP|MND1|H2AZ2	-1.49595	0	52	0	0	-4.02844	4.86386
1	-2.84799	R-HSA-9018519	M1	1	0	Reactome Gene Sets	6	Estrogen-dependent gene expression	-2.84799	2.93273	3.80254	24155	150	604	11	1.82119	0.544087	865|2354|2963|3014|3015|3320|4602|7039|8364|9126|94239	CBFB|FOSB|GTF2F2|H2AX|H2AZ1|HSP90AA1|MYB|TGFA|H4C3|SMC3|H2AZ2	-1.38476	0	52	0	0	-4.02844	4.86386
1	-2.63629	R-HSA-212300	M1	1	0	Reactome Gene Sets	6	PRC2 methylates histones and DNA	-2.63629	3.83482	3.88463	24155	73	604	7	1.15894	0.435493	1786|2146|3014|3015|8364|23512|94239	DNMT1|EZH2|H2AX|H2AZ1|H4C3|SUZ12|H2AZ2	-1.21911	0	52	0	0	-4.02844	4.86386
1	-2.44344	R-HSA-5617472	M1	1	0	Reactome Gene Sets	6	Activation of anterior HOX genes in hindbrain development during early embryogenesis	-2.44344	2.95021	3.45832	24155	122	604	9	1.49007	0.492974	2146|3014|3015|8364|9063|9125|23512|79447|94239	EZH2|H2AX|H2AZ1|H4C3|PIAS2|CNOT9|SUZ12|PAGR1|H2AZ2	-1.0689	0	52	0	0	-4.02844	4.86386
1	-2.44344	R-HSA-5619507	M1	1	0	Reactome Gene Sets	6	Activation of HOX genes during differentiation	-2.44344	2.95021	3.45832	24155	122	604	9	1.49007	0.492974	2146|3014|3015|8364|9063|9125|23512|79447|94239	EZH2|H2AX|H2AZ1|H4C3|PIAS2|CNOT9|SUZ12|PAGR1|H2AZ2	-1.0689	0	52	0	0	-4.02844	4.86386
1	-2.44163	R-HSA-1221632	M1	1	0	Reactome Gene Sets	6	Meiotic synapsis	-2.44163	3.54357	3.62638	24155	79	604	7	1.15894	0.435493	672|3014|3015|4000|8364|9126|94239	BRCA1|H2AX|H2AZ1|LMNA|H4C3|SMC3|H2AZ2	-1.06808	0	52	0	0	-4.02844	4.86386
1	-2.38402	R-HSA-110328	M1	1	0	Reactome Gene Sets	6	Recognition and association of DNA glycosylase with site containing an affected pyrimidine	-2.38402	3.93361	3.67385	24155	61	604	6	0.993377	0.403525	3014|3015|8364|55247|94239|252969	H2AX|H2AZ1|H4C3|NEIL3|H2AZ2|NEIL2	-1.02313	0	52	0	0	-4.02844	4.86386
1	-2.38402	R-HSA-110329	M1	1	0	Reactome Gene Sets	6	Cleavage of the damaged pyrimidine	-2.38402	3.93361	3.67385	24155	61	604	6	0.993377	0.403525	3014|3015|8364|55247|94239|252969	H2AX|H2AZ1|H4C3|NEIL3|H2AZ2|NEIL2	-1.02313	0	52	0	0	-4.02844	4.86386
1	-2.38402	R-HSA-73928	M1	1	0	Reactome Gene Sets	6	Depyrimidination	-2.38402	3.93361	3.67385	24155	61	604	6	0.993377	0.403525	3014|3015|8364|55247|94239|252969	H2AX|H2AZ1|H4C3|NEIL3|H2AZ2|NEIL2	-1.02313	0	52	0	0	-4.02844	4.86386
1	-2.3145	R-HSA-73929	M1	1	0	Reactome Gene Sets	6	Base-Excision Repair, AP Site Formation	-2.3145	3.80874	3.57481	24155	63	604	6	0.993377	0.403525	3014|3015|8364|55247|94239|252969	H2AX|H2AZ1|H4C3|NEIL3|H2AZ2|NEIL2	-0.970546	0	52	0	0	-4.02844	4.86386
1	-2.24781	R-HSA-5334118	M1	1	0	Reactome Gene Sets	6	DNA methylation	-2.24781	3.69154	3.47975	24155	65	604	6	0.993377	0.403525	1786|3014|3015|8364|29128|94239	DNMT1|H2AX|H2AZ1|H4C3|UHRF1|H2AZ2	-0.921632	0	52	0	0	-4.02844	4.86386
1	-2.13189	R-HSA-9616222	M1	1	0	Reactome Gene Sets	6	Transcriptional regulation of granulopoiesis	-2.13189	3.11047	3.21229	24155	90	604	7	1.15894	0.435493	865|3014|3015|4602|7027|8364|94239	CBFB|H2AX|H2AZ1|MYB|TFDP1|H4C3|H2AZ2	-0.836945	0	52	0	0	-4.02844	4.86386
1	-3.98252	R-HSA-176409	M1	1	0	Reactome Gene Sets	6	APC/C:Cdc20 mediated degradation of mitotic proteins	-3.98252	4.79901	5.27692	24155	75	604	9	1.49007	0.492974	701|891|4085|5701|5708|5718|9184|9232|10197	BUB1B|CCNB1|MAD2L1|PSMC2|PSMD2|PSMD12|BUB3|PTTG1|PSME3	-2.32012	0	53	1	1	-3.98252	5.16022
1	-3.93738	R-HSA-176814	M1	1	0	Reactome Gene Sets	6	Activation of APC/C and APC/C:Cdc20 mediated degradation of mitotic proteins	-3.93738	4.73586	5.2238	24155	76	604	9	1.49007	0.492974	701|891|4085|5701|5708|5718|9184|9232|10197	BUB1B|CCNB1|MAD2L1|PSMC2|PSMD2|PSMD12|BUB3|PTTG1|PSME3	-2.27975	0	53	0	0	-3.98252	5.16022
1	-3.72258	GO:0031145	M1	1	0	GO Biological Processes	19	anaphase-promoting complex-dependent catabolic process	-3.72258	4.44352	4.97141	24155	81	604	9	1.49007	0.492974	701|891|4085|5701|5708|5718|9184|9232|10197	BUB1B|CCNB1|MAD2L1|PSMC2|PSMD2|PSMD12|BUB3|PTTG1|PSME3	-2.1014	0	53	0	0	-3.98252	5.16022
1	-3.5243	R-HSA-174143	M1	1	0	Reactome Gene Sets	6	APC/C-mediated degradation of cell cycle proteins	-3.5243	4.18518	4.73874	24155	86	604	9	1.49007	0.492974	701|891|4085|5701|5708|5718|9184|9232|10197	BUB1B|CCNB1|MAD2L1|PSMC2|PSMD2|PSMD12|BUB3|PTTG1|PSME3	-1.94315	0	53	0	0	-3.98252	5.16022
1	-3.5243	R-HSA-453276	M1	1	0	Reactome Gene Sets	6	Regulation of mitotic cell cycle	-3.5243	4.18518	4.73874	24155	86	604	9	1.49007	0.492974	701|891|4085|5701|5708|5718|9184|9232|10197	BUB1B|CCNB1|MAD2L1|PSMC2|PSMD2|PSMD12|BUB3|PTTG1|PSME3	-1.94315	0	53	0	0	-3.98252	5.16022
1	-3.36379	R-HSA-8939236	M1	1	0	Reactome Gene Sets	6	RUNX1 regulates transcription of genes involved in differentiation of HSCs	-3.36379	3.38391	4.36455	24155	130	604	11	1.82119	0.544087	865|3014|3015|4005|4602|5701|5708|5718|8364|10197|94239	CBFB|H2AX|H2AZ1|LMO2|MYB|PSMC2|PSMD2|PSMD12|H4C3|PSME3|H2AZ2	-1.80059	0	53	0	0	-3.98252	5.16022
1	-3.07627	GO:0048863	M1	1	0	GO Biological Processes	19	stem cell differentiation	-3.07627	2.48011	3.82771	24155	258	604	16	2.64901	0.653421	865|2022|3084|3516|3976|4005|4602|5701|5708|5718|6664|8091|10197|10371|23528|26585	CBFB|ENG|NRG1|RBPJ|LIF|LMO2|MYB|PSMC2|PSMD2|PSMD12|SOX11|HMGA2|PSME3|SEMA3A|ZNF281|GREM1	-1.56963	0	53	0	0	-3.98252	5.16022
1	-3.06022	R-HSA-176408	M1	1	0	Reactome Gene Sets	6	Regulation of APC/C activators between G1/S and early anaphase	-3.06022	3.99917	4.303	24155	80	604	8	1.3245	0.465171	701|891|4085|5701|5708|5718|9184|10197	BUB1B|CCNB1|MAD2L1|PSMC2|PSMD2|PSMD12|BUB3|PSME3	-1.55626	0	53	0	0	-3.98252	5.16022
1	-2.89042	GO:1902750	M1	1	0	GO Biological Processes	19	negative regulation of cell cycle G2/M phase transition	-2.89042	3.42786	3.99273	24155	105	604	9	1.49007	0.492974	672|5701|5708|5718|8091|9555|10197|29980|51514	BRCA1|PSMC2|PSMD2|PSMD12|HMGA2|MACROH2A1|PSME3|DONSON|DTL	-1.41673	0	53	0	0	-3.98252	5.16022
1	-2.88721	GO:1901532	M1	1	0	GO Biological Processes	19	regulation of hematopoietic progenitor cell differentiation	-2.88721	3.76393	4.08796	24155	85	604	8	1.3245	0.465171	865|4005|4602|5701|5708|5718|10197|201163	CBFB|LMO2|MYB|PSMC2|PSMD2|PSMD12|PSME3|FLCN	-1.41539	0	53	0	0	-3.98252	5.16022
1	-2.88721	R-HSA-69656	M1	1	0	Reactome Gene Sets	6	Cyclin A:Cdk2-associated events at S phase entry	-2.88721	3.76393	4.08796	24155	85	604	8	1.3245	0.465171	993|994|1163|5701|5708|5718|7027|10197	CDC25A|CDC25B|CKS1B|PSMC2|PSMD2|PSMD12|TFDP1|PSME3	-1.41539	0	53	0	0	-3.98252	5.16022
1	-2.67079	GO:1902036	M1	1	0	GO Biological Processes	19	regulation of hematopoietic stem cell differentiation	-2.67079	3.88808	3.93033	24155	72	604	7	1.15894	0.435493	865|4005|4602|5701|5708|5718|10197	CBFB|LMO2|MYB|PSMC2|PSMD2|PSMD12|PSME3	-1.23918	0	53	0	0	-3.98252	5.16022
1	-2.67079	R-HSA-174184	M1	1	0	Reactome Gene Sets	6	Cdc20:Phospho-APC/C mediated degradation of Cyclin A	-2.67079	3.88808	3.93033	24155	72	604	7	1.15894	0.435493	701|4085|5701|5708|5718|9184|10197	BUB1B|MAD2L1|PSMC2|PSMD2|PSMD12|BUB3|PSME3	-1.23918	0	53	0	0	-3.98252	5.16022
1	-2.65279	R-HSA-9604323	M1	1	0	Reactome Gene Sets	6	Negative regulation of NOTCH4 signaling	-2.65279	4.44352	4.05687	24155	54	604	6	0.993377	0.403525	5701|5708|5718|7534|10197|10460	PSMC2|PSMD2|PSMD12|YWHAZ|PSME3|TACC3	-1.23011	0	53	0	0	-3.98252	5.16022
1	-2.63629	R-HSA-179419	M1	1	0	Reactome Gene Sets	6	APC:Cdc20 mediated degradation of cell cycle proteins prior to satisfation of the cell cycle checkpo	-2.63629	3.83482	3.88463	24155	73	604	7	1.15894	0.435493	701|4085|5701|5708|5718|9184|10197	BUB1B|MAD2L1|PSMC2|PSMD2|PSMD12|BUB3|PSME3	-1.21911	0	53	0	0	-3.98252	5.16022
1	-2.60109	R-HSA-157118	M1	1	0	Reactome Gene Sets	6	Signaling by NOTCH	-2.60109	2.38249	3.41053	24155	235	604	14	2.31788	0.612258	1956|3014|3015|3516|5701|5708|5718|7027|7534|8364|9787|10197|10460|94239	EGFR|H2AX|H2AZ1|RBPJ|PSMC2|PSMD2|PSMD12|TFDP1|YWHAZ|H4C3|DLGAP5|PSME3|TACC3|H2AZ2	-1.19204	0	53	0	0	-3.98252	5.16022
1	-2.55045	R-HSA-8878159	M1	1	0	Reactome Gene Sets	6	Transcriptional regulation by RUNX3	-2.55045	3.33264	3.66736	24155	96	604	8	1.3245	0.465171	865|3516|5701|5708|5718|6932|10197|25937	CBFB|RBPJ|PSMC2|PSMD2|PSMD12|TCF7|PSME3|WWTR1	-1.15045	0	53	0	0	-3.98252	5.16022
1	-2.50203	GO:0002244	M1	1	0	GO Biological Processes	19	hematopoietic progenitor cell differentiation	-2.50203	2.65005	3.41629	24155	166	604	11	1.82119	0.544087	865|1436|4005|4602|5701|5708|5718|10197|23215|54443|201163	CBFB|CSF1R|LMO2|MYB|PSMC2|PSMD2|PSMD12|PSME3|PRRC2C|ANLN|FLCN	-1.11289	0	53	0	0	-3.98252	5.16022
1	-2.45659	R-HSA-351202	M1	1	0	Reactome Gene Sets	6	Metabolism of polyamines	-2.45659	4.06695	3.77719	24155	59	604	6	0.993377	0.403525	5701|5708|5718|6611|10197|113451	PSMC2|PSMD2|PSMD12|SMS|PSME3|AZIN2	-1.07956	0	53	0	0	-3.98252	5.16022
1	-2.37809	R-HSA-195721	M1	1	0	Reactome Gene Sets	6	Signaling by WNT	-2.37809	2.06018	3.10548	24155	330	604	17	2.81457	0.672958	805|3014|3015|5515|5578|5701|5708|5718|5880|6932|7477|7534|8364|10197|55366|64840|94239	CALM2|H2AX|H2AZ1|PPP2CA|PRKCA|PSMC2|PSMD2|PSMD12|RAC2|TCF7|WNT7B|YWHAZ|H4C3|PSME3|LGR4|PORCN|H2AZ2	-1.01912	0	53	0	0	-3.98252	5.16022
1	-2.35158	R-HSA-9013694	M1	1	0	Reactome Gene Sets	6	Signaling by NOTCH4	-2.35158	3.41393	3.5065	24155	82	604	7	1.15894	0.435493	3516|5701|5708|5718|7534|10197|10460	RBPJ|PSMC2|PSMD2|PSMD12|YWHAZ|PSME3|TACC3	-0.999302	0	53	0	0	-3.98252	5.16022
1	-2.32254	GO:0060218	M1	1	0	GO Biological Processes	19	hematopoietic stem cell differentiation	-2.32254	3.3728	3.46778	24155	83	604	7	1.15894	0.435493	865|4005|4602|5701|5708|5718|10197	CBFB|LMO2|MYB|PSMC2|PSMD2|PSMD12|PSME3	-0.976742	0	53	0	0	-3.98252	5.16022
1	-2.32254	R-HSA-69202	M1	1	0	Reactome Gene Sets	6	Cyclin E associated events during G1/S transition	-2.32254	3.3728	3.46778	24155	83	604	7	1.15894	0.435493	993|1163|5701|5708|5718|7027|10197	CDC25A|CKS1B|PSMC2|PSMD2|PSMD12|TFDP1|PSME3	-0.976742	0	53	0	0	-3.98252	5.16022
1	-2.31019	R-HSA-109581	M1	1	0	Reactome Gene Sets	6	Apoptosis	-2.31019	2.49948	3.19735	24155	176	604	11	1.82119	0.544087	4000|5317|5701|5708|5718|7027|7534|8797|10197|10971|23643	LMNA|PKP1|PSMC2|PSMD2|PSMD12|TFDP1|YWHAZ|TNFRSF10A|PSME3|YWHAQ|LY96	-0.967622	0	53	0	0	-3.98252	5.16022
1	-2.25587	R-HSA-5357801	M1	1	0	Reactome Gene Sets	6	Programmed Cell Death	-2.25587	2.45759	3.1346	24155	179	604	11	1.82119	0.544087	4000|5317|5701|5708|5718|7027|7534|8797|10197|10971|23643	LMNA|PKP1|PSMC2|PSMD2|PSMD12|TFDP1|YWHAZ|TNFRSF10A|PSME3|YWHAQ|LY96	-0.923309	0	53	0	0	-3.98252	5.16022
1	-2.14706	GO:0031572	M1	1	0	GO Biological Processes	19	G2 DNA damage checkpoint	-2.14706	5.16022	3.71177	24155	31	604	4	0.662252	0.330028	672|8091|29980|51514	BRCA1|HMGA2|DONSON|DTL	-0.848638	0	53	0	0	-3.98252	5.16022
1	-2.05635	GO:0010972	M1	1	0	GO Biological Processes	19	negative regulation of G2/M transition of mitotic cell cycle	-2.05635	3.01013	3.11034	24155	93	604	7	1.15894	0.435493	672|5701|5708|5718|8091|10197|29980	BRCA1|PSMC2|PSMD2|PSMD12|HMGA2|PSME3|DONSON	-0.775836	0	53	0	0	-3.98252	5.16022
1	-2.02665	GO:0001666	M1	1	0	GO Biological Processes	19	response to hypoxia	-2.02665	1.89376	2.73227	24155	359	604	17	2.81457	0.672958	218|891|3516|3673|3776|3778|4000|4602|5315|5327|5467|5701|5708|5718|5743|10197|64506	ALDH3A1|CCNB1|RBPJ|ITGA2|KCNK2|KCNMA1|LMNA|MYB|PKM|PLAT|PPARD|PSMC2|PSMD2|PSMD12|PTGS2|PSME3|CPEB1	-0.750506	0	53	0	0	-3.98252	5.16022
1	-2.02237	R-HSA-69601	M1	1	0	Reactome Gene Sets	6	Ubiquitin Mediated Degradation of Phosphorylated Cdc25A	-2.02237	3.84536	3.28936	24155	52	604	5	0.827815	0.368674	993|5701|5708|5718|10197	CDC25A|PSMC2|PSMD2|PSMD12|PSME3	-0.748584	0	53	0	0	-3.98252	5.16022
1	-2.02237	R-HSA-69610	M1	1	0	Reactome Gene Sets	6	p53-Independent DNA Damage Response	-2.02237	3.84536	3.28936	24155	52	604	5	0.827815	0.368674	993|5701|5708|5718|10197	CDC25A|PSMC2|PSMD2|PSMD12|PSME3	-0.748584	0	53	0	0	-3.98252	5.16022
1	-2.02237	R-HSA-69613	M1	1	0	Reactome Gene Sets	6	p53-Independent G1/S DNA damage checkpoint	-2.02237	3.84536	3.28936	24155	52	604	5	0.827815	0.368674	993|5701|5708|5718|10197	CDC25A|PSMC2|PSMD2|PSMD12|PSME3	-0.748584	0	53	0	0	-3.98252	5.16022
1	-2.01435	GO:2000736	M1	1	0	GO Biological Processes	19	regulation of stem cell differentiation	-2.01435	2.7113	2.98426	24155	118	604	8	1.3245	0.465171	865|2022|4005|4602|5701|5708|5718|10197	CBFB|ENG|LMO2|MYB|PSMC2|PSMD2|PSMD12|PSME3	-0.743307	0	53	0	0	-3.98252	5.16022
1	-3.9721	GO:0007420	M1	1	0	GO Biological Processes	19	brain development	-3.9721	1.96145	4.23622	24155	734	604	36	5.96026	0.963319	372|805|1063|1436|1745|1956|2044|2048|2057|2131|2146|2177|3014|3084|3184|3516|3925|5050|6240|7477|8624|8871|9118|9289|9353|9928|10371|10458|10460|10763|10971|27429|57526|58155|84678|284403	ARCN1|CALM2|CENPF|CSF1R|DLX1|EGFR|EPHA5|EPHB2|EPOR|EXT1|EZH2|FANCD2|H2AX|NRG1|HNRNPD|RBPJ|STMN1|PAFAH1B3|RRM1|WNT7B|PSMG1|SYNJ2|INA|ADGRG1|SLIT2|KIF14|SEMA3A|BAIAP2|TACC3|NES|YWHAQ|HTRA2|PCDH19|PTBP2|KDM2B|WDR62	-2.31161	0	54	1	1	-3.9721	2.75805
1	-3.81	GO:0060322	M1	1	0	GO Biological Processes	19	head development	-3.81	1.90437	4.10355	24155	777	604	37	6.12583	0.975746	372|805|1063|1436|1745|1956|2044|2048|2057|2131|2146|2177|3014|3084|3184|3516|3925|5050|6240|7477|8624|8871|9118|9289|9353|9928|10371|10458|10460|10763|10971|27429|57526|58155|64651|84678|284403	ARCN1|CALM2|CENPF|CSF1R|DLX1|EGFR|EPHA5|EPHB2|EPOR|EXT1|EZH2|FANCD2|H2AX|NRG1|HNRNPD|RBPJ|STMN1|PAFAH1B3|RRM1|WNT7B|PSMG1|SYNJ2|INA|ADGRG1|SLIT2|KIF14|SEMA3A|BAIAP2|TACC3|NES|YWHAQ|HTRA2|PCDH19|PTBP2|CSRNP1|KDM2B|WDR62	-2.1719	0	54	0	0	-3.9721	2.75805
1	-3.16696	GO:0021537	M1	1	0	GO Biological Processes	19	telencephalon development	-3.16696	2.52912	3.91555	24155	253	604	16	2.64901	0.653421	1436|1745|1956|2044|2048|2131|2146|3014|3084|9289|9353|9928|10371|10460|84678|284403	CSF1R|DLX1|EGFR|EPHA5|EPHB2|EXT1|EZH2|H2AX|NRG1|ADGRG1|SLIT2|KIF14|SEMA3A|TACC3|KDM2B|WDR62	-1.63829	0	54	0	0	-3.9721	2.75805
1	-2.78257	GO:0030900	M1	1	0	GO Biological Processes	19	forebrain development	-2.78257	2.09381	3.45095	24155	382	604	20	3.31126	0.728058	1436|1745|1956|2044|2048|2131|2146|3014|3084|3516|6240|7477|9289|9353|9928|10371|10460|27429|84678|284403	CSF1R|DLX1|EGFR|EPHA5|EPHB2|EXT1|EZH2|H2AX|NRG1|RBPJ|RRM1|WNT7B|ADGRG1|SLIT2|KIF14|SEMA3A|TACC3|HTRA2|KDM2B|WDR62	-1.33072	0	54	0	0	-3.9721	2.75805
1	-2.38488	GO:0021543	M1	1	0	GO Biological Processes	19	pallium development	-2.38488	2.55761	3.28307	24155	172	604	11	1.82119	0.544087	1745|1956|2044|2146|3014|9289|9353|9928|10371|10460|284403	DLX1|EGFR|EPHA5|EZH2|H2AX|ADGRG1|SLIT2|KIF14|SEMA3A|TACC3|WDR62	-1.02313	0	54	0	0	-3.9721	2.75805
1	-2.05699	GO:0021987	M1	1	0	GO Biological Processes	19	cerebral cortex development	-2.05699	2.75805	3.03956	24155	116	604	8	1.3245	0.465171	1956|3014|9289|9353|9928|10371|10460|284403	EGFR|H2AX|ADGRG1|SLIT2|KIF14|SEMA3A|TACC3|WDR62	-0.775836	0	54	0	0	-3.9721	2.75805
1	-3.96194	CORUM:1332	M1	1	0	CORUM	33	Large Drosha complex	-3.96194	9.99793	6.44677	24155	20	604	5	0.827815	0.368674	1665|3608|3609|4670|11100	DHX15|ILF2|ILF3|HNRNPM|HNRNPUL1	-2.30241	0	55	1	1	-3.96194	9.99793
1	-3.91623	GO:0040008	M1	1	0	GO Biological Processes	19	regulation of growth	-3.91623	1.99372	4.21581	24155	682	604	34	5.62914	0.937824	86|627|891|1382|1839|1956|2247|2596|2803|3516|3776|5393|5467|5515|6446|8091|8200|9306|9353|9928|10276|10298|10371|10477|11116|27429|29967|51083|51330|65981|84260|84678|131566|201163	ACTL6A|BDNF|CCNB1|CRABP2|HBEGF|EGFR|FGF2|GAP43|GOLGA4|RBPJ|KCNK2|EXOSC9|PPARD|PPP2CA|SGK1|HMGA2|GDF5|SOCS6|SLIT2|KIF14|NET1|PAK4|SEMA3A|UBE2E3|FGFR1OP|HTRA2|LRP12|GAL|TNFRSF12A|CAPRIN2|TCHP|KDM2B|DCBLD2|FLCN	-2.26239	0	56	1	1	-3.91623	2.0998
1	-3.02019	GO:0001558	M1	1	0	GO Biological Processes	19	regulation of cell growth	-3.02019	2.0998	3.63686	24155	419	604	22	3.64238	0.762285	627|1382|1839|1956|2803|5393|5467|5515|6446|9353|9928|10276|10298|10371|11116|51083|51330|65981|84260|84678|131566|201163	BDNF|CRABP2|HBEGF|EGFR|GOLGA4|EXOSC9|PPARD|PPP2CA|SGK1|SLIT2|KIF14|NET1|PAK4|SEMA3A|FGFR1OP|GAL|TNFRSF12A|CAPRIN2|TCHP|KDM2B|DCBLD2|FLCN	-1.52153	0	56	0	0	-3.91623	2.0998
1	-2.86551	GO:0016049	M1	1	0	GO Biological Processes	19	cell growth	-2.86551	1.97084	3.46611	24155	487	604	24	3.97351	0.794812	627|1382|1839|1956|2803|3320|5393|5467|5515|6446|7074|9353|9928|10276|10298|10371|11116|51083|51330|65981|84260|84678|131566|201163	BDNF|CRABP2|HBEGF|EGFR|GOLGA4|HSP90AA1|EXOSC9|PPARD|PPP2CA|SGK1|TIAM1|SLIT2|KIF14|NET1|PAK4|SEMA3A|FGFR1OP|GAL|TNFRSF12A|CAPRIN2|TCHP|KDM2B|DCBLD2|FLCN	-1.39791	0	56	0	0	-3.91623	2.0998
1	-3.87798	GO:0043009	M1	1	0	GO Biological Processes	19	chordate embryonic development	-3.87798	2.03456	4.2103	24155	629	604	32	5.29801	0.911418	86|672|891|1745|1956|2131|3054|3516|3880|3976|4325|4678|5932|6664|6932|7477|8061|8533|8915|10436|10683|10733|23764|26097|54888|55723|57493|79682|84678|144455|154796|201163	ACTL6A|BRCA1|CCNB1|DLX1|EGFR|EXT1|HCFC1|RBPJ|KRT19|LIF|MMP16|NASP|RBBP8|SOX11|TCF7|WNT7B|FOSL1|COPS3|BCL10|EMG1|DLL3|PLK4|MAFF|CHTOP|NSUN2|ASF1B|HEG1|CENPU|KDM2B|E2F7|AMOT|FLCN	-2.22789	0	57	1	1	-3.87798	9.99793
1	-3.67013	GO:0009792	M1	1	0	GO Biological Processes	19	embryo development ending in birth or egg hatching	-3.67013	1.98101	4.04746	24155	646	604	32	5.29801	0.911418	86|672|891|1745|1956|2131|3054|3516|3880|3976|4325|4678|5932|6664|6932|7477|8061|8533|8915|10436|10683|10733|23764|26097|54888|55723|57493|79682|84678|144455|154796|201163	ACTL6A|BRCA1|CCNB1|DLX1|EGFR|EXT1|HCFC1|RBPJ|KRT19|LIF|MMP16|NASP|RBBP8|SOX11|TCF7|WNT7B|FOSL1|COPS3|BCL10|EMG1|DLL3|PLK4|MAFF|CHTOP|NSUN2|ASF1B|HEG1|CENPU|KDM2B|E2F7|AMOT|FLCN	-2.05502	0	57	0	0	-3.87798	9.99793
1	-3.6683	GO:0001701	M1	1	0	GO Biological Processes	19	in utero embryonic development	-3.6683	2.34618	4.20747	24155	375	604	22	3.64238	0.762285	86|891|1956|3054|3516|3880|3976|4678|5932|7477|8061|8533|10436|10733|23764|26097|54888|55723|57493|144455|154796|201163	ACTL6A|CCNB1|EGFR|HCFC1|RBPJ|KRT19|LIF|NASP|RBBP8|WNT7B|FOSL1|COPS3|EMG1|PLK4|MAFF|CHTOP|NSUN2|ASF1B|HEG1|E2F7|AMOT|FLCN	-2.05405	0	57	0	0	-3.87798	9.99793
1	-3.31637	GO:0001890	M1	1	0	GO Biological Processes	19	placenta development	-3.31637	3.13661	4.24575	24155	153	604	12	1.98675	0.567801	1956|2057|3516|3880|3976|5467|5743|7477|8061|10733|26528|144455	EGFR|EPOR|RBPJ|KRT19|LIF|PPARD|PTGS2|WNT7B|FOSL1|PLK4|DAZAP1|E2F7	-1.75774	0	57	0	0	-3.87798	9.99793
1	-2.53886	GO:0060707	M1	1	0	GO Biological Processes	19	trophoblast giant cell differentiation	-2.53886	9.99793	4.99282	24155	12	604	3	0.496689	0.28605	3976|10733|144455	LIF|PLK4|E2F7	-1.14352	0	57	0	0	-3.87798	9.99793
1	-2.50797	GO:0048608	M1	1	0	GO Biological Processes	19	reproductive structure development	-2.50797	1.94404	3.17071	24155	432	604	21	3.47682	0.745399	174|1956|2057|3516|3880|3976|4678|5467|5743|6240|6382|6932|7477|8061|9289|9353|10371|10733|26528|55366|144455	AFP|EGFR|EPOR|RBPJ|KRT19|LIF|NASP|PPARD|PTGS2|RRM1|SDC1|TCF7|WNT7B|FOSL1|ADGRG1|SLIT2|SEMA3A|PLK4|DAZAP1|LGR4|E2F7	-1.11831	0	57	0	0	-3.87798	9.99793
1	-2.47322	GO:0061458	M1	1	0	GO Biological Processes	19	reproductive system development	-2.47322	1.93063	3.13671	24155	435	604	21	3.47682	0.745399	174|1956|2057|3516|3880|3976|4678|5467|5743|6240|6382|6932|7477|8061|9289|9353|10371|10733|26528|55366|144455	AFP|EGFR|EPOR|RBPJ|KRT19|LIF|NASP|PPARD|PTGS2|RRM1|SDC1|TCF7|WNT7B|FOSL1|ADGRG1|SLIT2|SEMA3A|PLK4|DAZAP1|LGR4|E2F7	-1.09063	0	57	0	0	-3.87798	9.99793
1	-2.42756	GO:0060706	M1	1	0	GO Biological Processes	19	cell differentiation involved in embryonic placenta development	-2.42756	6.15257	4.20968	24155	26	604	4	0.662252	0.330028	3880|3976|10733|144455	KRT19|LIF|PLK4|E2F7	-1.05986	0	57	0	0	-3.87798	9.99793
1	-2.18422	GO:0001892	M1	1	0	GO Biological Processes	19	embryonic placenta development	-2.18422	3.18116	3.28266	24155	88	604	7	1.15894	0.435493	1956|3516|3880|3976|7477|10733|144455	EGFR|RBPJ|KRT19|LIF|WNT7B|PLK4|E2F7	-0.874002	0	57	0	0	-3.87798	9.99793
1	-2.16406	GO:0003006	M1	1	0	GO Biological Processes	19	developmental process involved in reproduction	-2.16406	1.65402	2.76414	24155	677	604	28	4.63576	0.855529	174|891|994|1956|2057|2119|3516|3880|3976|4678|5467|5743|6240|6382|6932|7477|8061|9125|9289|9319|9353|10371|10733|23762|26528|54888|55366|144455	AFP|CCNB1|CDC25B|EGFR|EPOR|ETV5|RBPJ|KRT19|LIF|NASP|PPARD|PTGS2|RRM1|SDC1|TCF7|WNT7B|FOSL1|CNOT9|ADGRG1|TRIP13|SLIT2|SEMA3A|PLK4|OSBP2|DAZAP1|NSUN2|LGR4|E2F7	-0.860687	0	57	0	0	-3.87798	9.99793
1	-3.78704	CORUM:3047	M1	1	0	CORUM	33	Parvulin-associated pre-rRNP complex	-3.78704	13.3306	6.84206	24155	12	604	4	0.662252	0.330028	1665|10376|22974|84057	DHX15|TUBA1B|TPX2|MND1	-2.15613	0	58	1	1	-3.78704	13.3306
1	-3.75302	GO:0007435	M1	1	0	GO Biological Processes	19	salivary gland morphogenesis	-3.75302	7.05736	5.66023	24155	34	604	6	0.993377	0.403525	1956|3082|7052|10371|59277|284217	EGFR|HGF|TGM2|SEMA3A|NTN4|LAMA1	-2.12479	0	59	1	1	-3.75302	8.69385
1	-3.65236	GO:0060445	M1	1	0	GO Biological Processes	19	branching involved in salivary gland morphogenesis	-3.65236	8.69385	5.9118	24155	23	604	5	0.827815	0.368674	3082|7052|10371|59277|284217	HGF|TGM2|SEMA3A|NTN4|LAMA1	-2.04239	0	59	0	0	-3.75302	8.69385
1	-3.54292	GO:0007431	M1	1	0	GO Biological Processes	19	salivary gland development	-3.54292	6.48514	5.3472	24155	37	604	6	0.993377	0.403525	1956|3082|7052|10371|59277|284217	EGFR|HGF|TGM2|SEMA3A|NTN4|LAMA1	-1.94719	0	59	0	0	-3.75302	8.69385
1	-2.92121	GO:0035272	M1	1	0	GO Biological Processes	19	exocrine system development	-2.92121	4.99897	4.44125	24155	48	604	6	0.993377	0.403525	1956|3082|7052|10371|59277|284217	EGFR|HGF|TGM2|SEMA3A|NTN4|LAMA1	-1.44189	0	59	0	0	-3.75302	8.69385
1	-2.86203	GO:0001763	M1	1	0	GO Biological Processes	19	morphogenesis of a branching structure	-2.86203	2.65251	3.72003	24155	196	604	13	2.15232	0.590487	1305|2022|2119|2247|3082|7052|8914|9353|10253|10371|55366|59277|284217	COL13A1|ENG|ETV5|FGF2|HGF|TGM2|TIMELESS|SLIT2|SPRY2|SEMA3A|LGR4|NTN4|LAMA1	-1.39634	0	59	0	0	-3.75302	8.69385
1	-2.66258	GO:0061138	M1	1	0	GO Biological Processes	19	morphogenesis of a branching epithelium	-2.66258	2.63682	3.54963	24155	182	604	12	1.98675	0.567801	2022|2119|2247|3082|7052|8914|9353|10253|10371|55366|59277|284217	ENG|ETV5|FGF2|HGF|TGM2|TIMELESS|SLIT2|SPRY2|SEMA3A|LGR4|NTN4|LAMA1	-1.23434	0	59	0	0	-3.75302	8.69385
1	-3.66002	GO:0070661	M1	1	0	GO Biological Processes	19	leukocyte proliferation	-3.66002	2.53281	4.27826	24155	300	604	19	3.1457	0.710231	1436|1794|1880|2150|3070|3569|4860|5880|6664|8379|10457|23240|23529|23705|26191|26585|51083|80380|338376	CSF1R|DOCK2|GPR183|F2RL1|HELLS|IL6|PNP|RAC2|SOX11|MAD1L1|GPNMB|TMEM131L|CLCF1|CADM1|PTPN22|GREM1|GAL|PDCD1LG2|IFNE	-2.04749	0	60	1	1	-3.66002	3.589
1	-2.80396	GO:0046651	M1	1	0	GO Biological Processes	19	lymphocyte proliferation	-2.80396	2.33528	3.55984	24155	274	604	16	2.64901	0.653421	1794|1880|3070|3569|4860|5880|6664|8379|10457|23240|23529|23705|26191|51083|80380|338376	DOCK2|GPR183|HELLS|IL6|PNP|RAC2|SOX11|MAD1L1|GPNMB|TMEM131L|CLCF1|CADM1|PTPN22|GAL|PDCD1LG2|IFNE	-1.34616	0	60	0	0	-3.66002	3.589
1	-2.77173	GO:0032943	M1	1	0	GO Biological Processes	19	mononuclear cell proliferation	-2.77173	2.31836	3.52768	24155	276	604	16	2.64901	0.653421	1794|1880|3070|3569|4860|5880|6664|8379|10457|23240|23529|23705|26191|51083|80380|338376	DOCK2|GPR183|HELLS|IL6|PNP|RAC2|SOX11|MAD1L1|GPNMB|TMEM131L|CLCF1|CADM1|PTPN22|GAL|PDCD1LG2|IFNE	-1.32224	0	60	0	0	-3.66002	3.589
1	-2.47268	GO:0070664	M1	1	0	GO Biological Processes	19	negative regulation of leukocyte proliferation	-2.47268	3.589	3.66764	24155	78	604	7	1.15894	0.435493	6664|8379|10457|23240|26585|51083|80380	SOX11|MAD1L1|GPNMB|TMEM131L|GREM1|GAL|PDCD1LG2	-1.09063	0	60	0	0	-3.66002	3.589
1	-2.42356	GO:0051250	M1	1	0	GO Biological Processes	19	negative regulation of lymphocyte activation	-2.42356	2.73916	3.37549	24155	146	604	10	1.65563	0.519204	865|6664|8379|9306|10457|23240|26191|51083|80380|84695	CBFB|SOX11|MAD1L1|SOCS6|GPNMB|TMEM131L|PTPN22|GAL|PDCD1LG2|LOXL3	-1.05687	0	60	0	0	-3.66002	3.589
1	-2.39098	GO:0070663	M1	1	0	GO Biological Processes	19	regulation of leukocyte proliferation	-2.39098	2.34186	3.21657	24155	222	604	13	2.15232	0.590487	1880|3569|4860|5880|6664|8379|10457|23240|23529|26191|26585|51083|80380	GPR183|IL6|PNP|RAC2|SOX11|MAD1L1|GPNMB|TMEM131L|CLCF1|PTPN22|GREM1|GAL|PDCD1LG2	-1.02769	0	60	0	0	-3.66002	3.589
1	-2.19766	GO:0050670	M1	1	0	GO Biological Processes	19	regulation of lymphocyte proliferation	-2.19766	2.30721	3.03222	24155	208	604	12	1.98675	0.567801	1880|3569|4860|5880|6664|8379|10457|23240|23529|26191|51083|80380	GPR183|IL6|PNP|RAC2|SOX11|MAD1L1|GPNMB|TMEM131L|CLCF1|PTPN22|GAL|PDCD1LG2	-0.884443	0	60	0	0	-3.66002	3.589
1	-2.18163	GO:0032944	M1	1	0	GO Biological Processes	19	regulation of mononuclear cell proliferation	-2.18163	2.29618	3.0139	24155	209	604	12	1.98675	0.567801	1880|3569|4860|5880|6664|8379|10457|23240|23529|26191|51083|80380	GPR183|IL6|PNP|RAC2|SOX11|MAD1L1|GPNMB|TMEM131L|CLCF1|PTPN22|GAL|PDCD1LG2	-0.871834	0	60	0	0	-3.66002	3.589
1	-2.14554	GO:0050868	M1	1	0	GO Biological Processes	19	negative regulation of T cell activation	-2.14554	2.85655	3.15377	24155	112	604	8	1.3245	0.465171	865|8379|9306|10457|23240|26191|80380|84695	CBFB|MAD1L1|SOCS6|GPNMB|TMEM131L|PTPN22|PDCD1LG2|LOXL3	-0.847535	0	60	0	0	-3.66002	3.589
1	-2.00603	GO:0032945	M1	1	0	GO Biological Processes	19	negative regulation of mononuclear cell proliferation	-2.00603	3.28699	3.13392	24155	73	604	6	0.993377	0.403525	6664|8379|10457|23240|51083|80380	SOX11|MAD1L1|GPNMB|TMEM131L|GAL|PDCD1LG2	-0.737064	0	60	0	0	-3.66002	3.589
1	-2.00603	GO:0050672	M1	1	0	GO Biological Processes	19	negative regulation of lymphocyte proliferation	-2.00603	3.28699	3.13392	24155	73	604	6	0.993377	0.403525	6664|8379|10457|23240|51083|80380	SOX11|MAD1L1|GPNMB|TMEM131L|GAL|PDCD1LG2	-0.737064	0	60	0	0	-3.66002	3.589
1	-3.65469	R-HSA-15869	M1	1	0	Reactome Gene Sets	6	Metabolism of nucleotides	-3.65469	3.95958	4.77315	24155	101	604	10	1.65563	0.519204	204|1633|4860|4907|6240|6241|7298|7371|26289|57089	AK2|DCK|PNP|NT5E|RRM1|RRM2|TYMS|UCK2|AK5|ENTPD7	-2.04386	0	61	1	1	-3.65469	10.6645
1	-3.37247	GO:0009263	M1	1	0	GO Biological Processes	19	deoxyribonucleotide biosynthetic process	-3.37247	10.6645	5.99602	24155	15	604	4	0.662252	0.330028	6240|6241|7298|26289	RRM1|RRM2|TYMS|AK5	-1.80698	0	61	0	0	-3.65469	10.6645
1	-3.15844	GO:0015949	M1	1	0	GO Biological Processes	19	nucleobase-containing small molecule interconversion	-3.15844	6.89512	5.08695	24155	29	604	5	0.827815	0.368674	204|6240|6241|7298|26289	AK2|RRM1|RRM2|TYMS|AK5	-1.63118	0	61	0	0	-3.65469	10.6645
1	-3.0882	R-HSA-499943	M1	1	0	Reactome Gene Sets	6	Interconversion of nucleotide di- and triphosphates	-3.0882	6.66529	4.9723	24155	30	604	5	0.827815	0.368674	204|6240|6241|7298|26289	AK2|RRM1|RRM2|TYMS|AK5	-1.57954	0	61	0	0	-3.65469	10.6645
1	-2.77524	GO:0009262	M1	1	0	GO Biological Processes	19	deoxyribonucleotide metabolic process	-2.77524	5.7131	4.46849	24155	35	604	5	0.827815	0.368674	6240|6241|7298|26289|252969	RRM1|RRM2|TYMS|AK5|NEIL2	-1.32458	0	61	0	0	-3.65469	10.6645
1	-2.33705	GO:0072527	M1	1	0	GO Biological Processes	19	pyrimidine-containing compound metabolic process	-2.33705	3.07629	3.39817	24155	104	604	8	1.3245	0.465171	1633|4907|6240|7298|7371|9582|26289|252969	DCK|NT5E|RRM1|TYMS|UCK2|APOBEC3B|AK5|NEIL2	-0.988222	0	61	0	0	-3.65469	10.6645
1	-3.636	R-HSA-75205	M1	1	0	Reactome Gene Sets	6	Dissolution of Fibrin Clot	-3.636	12.3051	6.52934	24155	13	604	4	0.662252	0.330028	5054|5055|5327|5329	SERPINE1|SERPINB2|PLAT|PLAUR	-2.02857	0	62	1	1	-3.636	12.3051
1	-3.58261	GO:0009611	M1	1	0	GO Biological Processes	19	response to wounding	-3.58261	1.93508	3.96704	24155	682	604	33	5.46358	0.92474	891|960|1719|1839|1956|2146|2150|2247|2596|3084|3569|3673|3776|4015|4147|5054|5055|5315|5327|5329|5467|5578|5792|6382|7104|7534|7980|10544|23468|23764|51330|64764|131566	CCNB1|CD44|DHFR|HBEGF|EGFR|EZH2|F2RL1|FGF2|GAP43|NRG1|IL6|ITGA2|KCNK2|LOX|MATN2|SERPINE1|SERPINB2|PKM|PLAT|PLAUR|PPARD|PRKCA|PTPRF|SDC1|TM4SF4|YWHAZ|TFPI2|PROCR|CBX5|MAFF|TNFRSF12A|CREB3L2|DCBLD2	-1.98107	0	62	0	0	-3.636	12.3051
1	-3.26214	GO:0042060	M1	1	0	GO Biological Processes	19	wound healing	-3.26214	1.9749	3.76196	24155	567	604	28	4.63576	0.855529	891|960|1839|1956|2146|2150|2247|2596|3084|3569|3673|4015|5054|5055|5315|5327|5329|5467|5578|6382|7104|7534|7980|10544|23468|23764|51330|131566	CCNB1|CD44|HBEGF|EGFR|EZH2|F2RL1|FGF2|GAP43|NRG1|IL6|ITGA2|LOX|SERPINE1|SERPINB2|PKM|PLAT|PLAUR|PPARD|PRKCA|SDC1|TM4SF4|YWHAZ|TFPI2|PROCR|CBX5|MAFF|TNFRSF12A|DCBLD2	-1.71398	0	62	0	0	-3.636	12.3051
1	-2.38167	GO:0061041	M1	1	0	GO Biological Processes	19	regulation of wound healing	-2.38167	2.70214	3.32634	24155	148	604	10	1.65563	0.519204	1839|2150|2247|5054|5055|5327|5329|5467|5578|51330	HBEGF|F2RL1|FGF2|SERPINE1|SERPINB2|PLAT|PLAUR|PPARD|PRKCA|TNFRSF12A	-1.02164	0	62	0	0	-3.636	12.3051
1	-2.30808	GO:0042730	M1	1	0	GO Biological Processes	19	fibrinolysis	-2.30808	5.7131	3.99616	24155	28	604	4	0.662252	0.330028	5054|5055|5327|5329	SERPINE1|SERPINB2|PLAT|PLAUR	-0.966886	0	62	0	0	-3.636	12.3051
1	-2.29398	GO:0050818	M1	1	0	GO Biological Processes	19	regulation of coagulation	-2.29398	3.33264	3.42965	24155	84	604	7	1.15894	0.435493	2150|5054|5055|5327|5329|5578|10544	F2RL1|SERPINE1|SERPINB2|PLAT|PLAUR|PRKCA|PROCR	-0.954621	0	62	0	0	-3.636	12.3051
1	-2.25587	GO:1903034	M1	1	0	GO Biological Processes	19	regulation of response to wounding	-2.25587	2.45759	3.1346	24155	179	604	11	1.82119	0.544087	1839|2150|2247|5054|5055|5327|5329|5467|5578|5792|51330	HBEGF|F2RL1|FGF2|SERPINE1|SERPINB2|PLAT|PLAUR|PPARD|PRKCA|PTPRF|TNFRSF12A	-0.923309	0	62	0	0	-3.636	12.3051
1	-3.57369	GO:0050730	M1	1	0	GO Biological Processes	19	regulation of peptidyl-tyrosine phosphorylation	-3.57369	2.6557	4.26501	24155	256	604	17	2.81457	0.672958	627|960|1436|1839|1956|3082|3084|3569|3589|3976|5515|7039|9052|11116|23529|26585|56034	BDNF|CD44|CSF1R|HBEGF|EGFR|HGF|NRG1|IL6|IL11|LIF|PPP2CA|TGFA|GPRC5A|FGFR1OP|CLCF1|GREM1|PDGFC	-1.97382	0	63	1	1	-3.57369	2.6557
1	-3.44041	M5885	M1	1	0	Canonical Pathways	11	NABA MATRISOME ASSOCIATED	-3.44041	1.85884	3.83437	24155	753	604	35	5.7947	0.950681	627|1839|2247|2312|3054|3082|3084|3569|3589|3976|4015|4314|4319|4325|5054|5055|5327|6382|7039|7052|7477|8200|10371|11174|11199|23529|25891|26585|27178|56034|56975|84695|92949|327657|338376	BDNF|HBEGF|FGF2|FLG|HCFC1|HGF|NRG1|IL6|IL11|LIF|LOX|MMP3|MMP10|MMP16|SERPINE1|SERPINB2|PLAT|SDC1|TGFA|TGM2|WNT7B|GDF5|SEMA3A|ADAMTS6|ANXA10|CLCF1|PAMR1|GREM1|IL37|PDGFC|FAM20C|LOXL3|ADAMTSL1|SERPINA9|IFNE	-1.86638	0	63	0	0	-3.57369	2.6557
1	-3.43165	GO:0018108	M1	1	0	GO Biological Processes	19	peptidyl-tyrosine phosphorylation	-3.43165	2.30721	4.02439	24155	364	604	21	3.47682	0.745399	627|960|1436|1839|1956|2044|2048|3082|3084|3569|3589|3976|5515|7039|8444|9052|9833|11116|23529|26585|56034	BDNF|CD44|CSF1R|HBEGF|EGFR|EPHA5|EPHB2|HGF|NRG1|IL6|IL11|LIF|PPP2CA|TGFA|DYRK3|GPRC5A|MELK|FGFR1OP|CLCF1|GREM1|PDGFC	-1.8584	0	63	0	0	-3.57369	2.6557
1	-3.38471	GO:0018212	M1	1	0	GO Biological Processes	19	peptidyl-tyrosine modification	-3.38471	2.28835	3.98289	24155	367	604	21	3.47682	0.745399	627|960|1436|1839|1956|2044|2048|3082|3084|3569|3589|3976|5515|7039|8444|9052|9833|11116|23529|26585|56034	BDNF|CD44|CSF1R|HBEGF|EGFR|EPHA5|EPHB2|HGF|NRG1|IL6|IL11|LIF|PPP2CA|TGFA|DYRK3|GPRC5A|MELK|FGFR1OP|CLCF1|GREM1|PDGFC	-1.81613	0	63	0	0	-3.57369	2.6557
1	-2.8422	R-HSA-449147	M1	1	0	Reactome Gene Sets	6	Signaling by Interleukins	-2.8422	1.82927	3.38862	24155	634	604	29	4.80132	0.869916	332|805|1436|1839|1956|2247|3082|3084|3181|3320|3569|3589|3976|4314|5055|5515|5701|5708|5718|5743|5784|6382|6627|6804|7039|7534|10197|23529|27178	BIRC5|CALM2|CSF1R|HBEGF|EGFR|FGF2|HGF|NRG1|HNRNPA2B1|HSP90AA1|IL6|IL11|LIF|MMP3|SERPINB2|PPP2CA|PSMC2|PSMD2|PSMD12|PTGS2|PTPN14|SDC1|SNRPA1|STX1A|TGFA|YWHAZ|PSME3|CLCF1|IL37	-1.38079	0	63	0	0	-3.57369	2.6557
1	-2.47216	GO:0050731	M1	1	0	GO Biological Processes	19	positive regulation of peptidyl-tyrosine phosphorylation	-2.47216	2.49948	3.34064	24155	192	604	12	1.98675	0.567801	627|960|1436|1839|3082|3084|3569|3589|3976|7039|23529|26585	BDNF|CD44|CSF1R|HBEGF|HGF|NRG1|IL6|IL11|LIF|TGFA|CLCF1|GREM1	-1.09063	0	63	0	0	-3.57369	2.6557
1	-2.45361	GO:0019221	M1	1	0	GO Biological Processes	19	cytokine-mediated signaling pathway	-2.45361	1.65379	3.00775	24155	798	604	33	5.46358	0.92474	332|865|960|1436|2057|2150|2247|3082|3181|3320|3569|3589|3976|3987|4314|4940|5055|5701|5708|5718|5743|6382|6627|6804|7534|8771|9125|9353|10197|23529|27178|51330|338376	BIRC5|CBFB|CD44|CSF1R|EPOR|F2RL1|FGF2|HGF|HNRNPA2B1|HSP90AA1|IL6|IL11|LIF|LIMS1|MMP3|OAS3|SERPINB2|PSMC2|PSMD2|PSMD12|PTGS2|SDC1|SNRPA1|STX1A|YWHAZ|TNFRSF6B|CNOT9|SLIT2|PSME3|CLCF1|IL37|TNFRSF12A|IFNE	-1.07758	0	63	0	0	-3.57369	2.6557
1	-2.20171	M5883	M1	1	0	Canonical Pathways	11	NABA SECRETED FACTORS	-2.20171	1.97634	2.92077	24155	344	604	17	2.81457	0.672958	627|1839|2247|2312|3054|3082|3084|3569|3589|3976|7039|7477|8200|23529|27178|56034|338376	BDNF|HBEGF|FGF2|FLG|HCFC1|HGF|NRG1|IL6|IL11|LIF|TGFA|WNT7B|GDF5|CLCF1|IL37|PDGFC|IFNE	-0.887201	0	63	0	0	-3.57369	2.6557
1	-2.07571	hsa04060	M1	1	0	KEGG Pathway	24	Cytokine-cytokine receptor interaction	-2.07571	2.07364	2.84111	24155	270	604	14	2.31788	0.612258	1436|1956|2057|3082|3569|3589|3976|8200|8771|8797|23529|51330|56034|338376	CSF1R|EGFR|EPOR|HGF|IL6|IL11|LIF|GDF5|TNFRSF6B|TNFRSF10A|CLCF1|TNFRSF12A|PDGFC|IFNE	-0.791192	0	63	0	0	-3.57369	2.6557
1	-3.54069	GO:0014013	M1	1	0	GO Biological Processes	19	regulation of gliogenesis	-3.54069	3.54765	4.55484	24155	124	604	11	1.82119	0.544087	274|1745|1880|2119|2146|3569|3976|4602|6664|7074|23529	BIN1|DLX1|GPR183|ETV5|EZH2|IL6|LIF|MYB|SOX11|TIAM1|CLCF1	-1.94694	0	64	1	1	-3.54069	9.22886
1	-2.96229	GO:0042063	M1	1	0	GO Biological Processes	19	gliogenesis	-2.96229	2.34434	3.68839	24155	290	604	17	2.81457	0.672958	274|1436|1745|1880|1956|2119|2146|2596|3084|3569|3976|4147|4602|6664|7074|9289|23529	BIN1|CSF1R|DLX1|GPR183|EGFR|ETV5|EZH2|GAP43|NRG1|IL6|LIF|MATN2|MYB|SOX11|TIAM1|ADGRG1|CLCF1	-1.47276	0	64	0	0	-3.54069	9.22886
1	-2.6024	GO:0014015	M1	1	0	GO Biological Processes	19	positive regulation of gliogenesis	-2.6024	3.783	3.83973	24155	74	604	7	1.15894	0.435493	274|2119|3569|3976|4602|7074|23529	BIN1|ETV5|IL6|LIF|MYB|TIAM1|CLCF1	-1.19281	0	64	0	0	-3.54069	9.22886
1	-2.5587	R-HSA-6783589	M1	1	0	Reactome Gene Sets	6	Interleukin-6 family signaling	-2.5587	6.66529	4.44681	24155	24	604	4	0.662252	0.330028	3569|3589|3976|23529	IL6|IL11|LIF|CLCF1	-1.15709	0	64	0	0	-3.54069	9.22886
1	-2.433	GO:0048711	M1	1	0	GO Biological Processes	19	positive regulation of astrocyte differentiation	-2.433	9.22886	4.75262	24155	13	604	3	0.496689	0.28605	274|3976|23529	BIN1|LIF|CLCF1	-1.0629	0	64	0	0	-3.54069	9.22886
1	-2.14706	GO:0048710	M1	1	0	GO Biological Processes	19	regulation of astrocyte differentiation	-2.14706	5.16022	3.71177	24155	31	604	4	0.662252	0.330028	274|3569|3976|23529	BIN1|IL6|LIF|CLCF1	-0.848638	0	64	0	0	-3.54069	9.22886
1	-2.09347	GO:0014009	M1	1	0	GO Biological Processes	19	glial cell proliferation	-2.09347	3.99917	3.3997	24155	50	604	5	0.827815	0.368674	1436|2119|3569|4602|6664	CSF1R|ETV5|IL6|MYB|SOX11	-0.804908	0	64	0	0	-3.54069	9.22886
1	-2.08911	R-HSA-6788467	M1	1	0	Reactome Gene Sets	6	IL-6-type cytokine receptor ligand interactions	-2.08911	7.05736	4.00097	24155	17	604	3	0.496689	0.28605	3589|3976|23529	IL11|LIF|CLCF1	-0.803783	0	64	0	0	-3.54069	9.22886
1	-3.5315	CORUM:6304	M1	1	0	CORUM	33	DDX11-Ctf18-RFC complex	-3.5315	19.9959	7.45235	24155	6	604	3	0.496689	0.28605	5111|11169|63922	PCNA|WDHD1|CHTF18	-1.94555	0	65	1	1	-3.5315	19.9959
1	-3.5315	GO:0010216	M1	1	0	GO Biological Processes	19	maintenance of DNA methylation	-3.5315	19.9959	7.45235	24155	6	604	3	0.496689	0.28605	1786|3070|29128	DNMT1|HELLS|UHRF1	-1.94555	0	66	1	1	-3.5315	19.9959
1	-2.53886	GO:0031507	M1	1	0	GO Biological Processes	19	heterochromatin assembly	-2.53886	9.99793	4.99282	24155	12	604	3	0.496689	0.28605	3070|3159|8091	HELLS|HMGA1|HMGA2	-1.14352	0	66	0	0	-3.5315	19.9959
1	-3.5315	CORUM:1464	M1	1	0	CORUM	33	Mis12 centromere complex	-3.5315	19.9959	7.45235	24155	6	604	3	0.496689	0.28605	11130|23468|79980	ZWINT|CBX5|DSN1	-1.94555	0	67	1	1	-3.5315	19.9959
1	-3.47421	GO:0036297	M1	1	0	GO Biological Processes	19	interstrand cross-link repair	-3.47421	5.28193	4.99757	24155	53	604	7	1.15894	0.435493	2177|2956|6117|10635|29089|55215|64710	FANCD2|MSH6|RPA1|RAD51AP1|UBE2T|FANCI|NUCKS1	-1.89545	0	68	1	1	-3.47421	5.28193
1	-3.47194	GO:2000104	M1	1	0	GO Biological Processes	19	negative regulation of DNA-dependent DNA replication	-3.47194	7.99834	5.60654	24155	25	604	5	0.827815	0.368674	2956|8914|9126|29980|54962	MSH6|TIMELESS|SMC3|DONSON|TIPIN	-1.89476	0	69	1	1	-3.47194	13.3306
1	-3.24063	GO:0051053	M1	1	0	GO Biological Processes	19	negative regulation of DNA metabolic process	-3.24063	3.07629	4.1664	24155	156	604	12	1.98675	0.567801	2956|3178|3776|8091|8914|9126|10721|29980|51750|54962|79000|201163	MSH6|HNRNPA1|KCNK2|HMGA2|TIMELESS|SMC3|POLQ|DONSON|RTEL1|TIPIN|AUNIP|FLCN	-1.69688	0	69	0	0	-3.47194	13.3306
1	-2.93267	GO:0048478	M1	1	0	GO Biological Processes	19	replication fork protection	-2.93267	13.3306	5.92503	24155	9	604	3	0.496689	0.28605	8914|29980|54962	TIMELESS|DONSON|TIPIN	-1.45146	0	69	0	0	-3.47194	13.3306
1	-2.51286	GO:0008156	M1	1	0	GO Biological Processes	19	negative regulation of DNA replication	-2.51286	4.99897	4.05361	24155	40	604	5	0.827815	0.368674	2956|8914|9126|29980|54962	MSH6|TIMELESS|SMC3|DONSON|TIPIN	-1.12238	0	69	0	0	-3.47194	13.3306
1	-2.16538	GO:0000076	M1	1	0	GO Biological Processes	19	DNA replication checkpoint	-2.16538	7.49845	4.16407	24155	16	604	3	0.496689	0.28605	8318|8914|54962	CDC45|TIMELESS|TIPIN	-0.861523	0	69	0	0	-3.47194	13.3306
1	-3.40426	GO:0007276	M1	1	0	GO Biological Processes	19	gamete generation	-3.40426	1.89073	3.82423	24155	698	604	33	5.46358	0.92474	174|646|881|891|994|2119|2177|3014|5050|5743|6627|8061|9232|9319|10657|23636|23705|23762|26091|26528|29127|29781|54888|55329|55339|55366|55706|55723|84678|84953|113451|116832|139886	AFP|BNC1|CCIN|CCNB1|CDC25B|ETV5|FANCD2|H2AX|PAFAH1B3|PTGS2|SNRPA1|FOSL1|PTTG1|TRIP13|KHDRBS1|NUP62|CADM1|OSBP2|HERC4|DAZAP1|RACGAP1|NCAPH2|NSUN2|MNS1|WDR33|LGR4|NDC1|ASF1B|KDM2B|MICALCL|AZIN2|RPL39L|SPIN4	-1.83413	0	70	1	1	-3.40426	1.91489
1	-2.87899	GO:0007283	M1	1	0	GO Biological Processes	19	spermatogenesis	-2.87899	1.91489	3.45311	24155	543	604	26	4.30464	0.825839	646|881|891|2119|3014|5050|6627|9232|9319|10657|23636|23705|23762|26091|26528|29127|54888|55329|55339|55366|55706|55723|84678|84953|113451|116832	BNC1|CCIN|CCNB1|ETV5|H2AX|PAFAH1B3|SNRPA1|PTTG1|TRIP13|KHDRBS1|NUP62|CADM1|OSBP2|HERC4|DAZAP1|RACGAP1|NSUN2|MNS1|WDR33|LGR4|NDC1|ASF1B|KDM2B|MICALCL|AZIN2|RPL39L	-1.40902	0	70	0	0	-3.40426	1.91489
1	-2.68299	GO:0048232	M1	1	0	GO Biological Processes	19	male gamete generation	-2.68299	1.85345	3.27542	24155	561	604	26	4.30464	0.825839	646|881|891|2119|3014|5050|6627|9232|9319|10657|23636|23705|23762|26091|26528|29127|54888|55329|55339|55366|55706|55723|84678|84953|113451|116832	BNC1|CCIN|CCNB1|ETV5|H2AX|PAFAH1B3|SNRPA1|PTTG1|TRIP13|KHDRBS1|NUP62|CADM1|OSBP2|HERC4|DAZAP1|RACGAP1|NSUN2|MNS1|WDR33|LGR4|NDC1|ASF1B|KDM2B|MICALCL|AZIN2|RPL39L	-1.24911	0	70	0	0	-3.40426	1.91489
1	-3.37622	GO:0046849	M1	1	0	GO Biological Processes	19	bone remodeling	-3.37622	3.99917	4.56497	24155	90	604	9	1.49007	0.492974	1436|1956|3569|5578|5880|8200|26585|55366|284266	CSF1R|EGFR|IL6|PRKCA|RAC2|GDF5|GREM1|LGR4|SIGLEC15	-1.80919	0	71	1	1	-3.37622	4.99897
1	-3.20244	GO:0048771	M1	1	0	GO Biological Processes	19	tissue remodeling	-3.20244	2.88829	4.07225	24155	180	604	13	2.15232	0.590487	1436|1956|3516|3569|3976|5578|5880|7052|8200|10457|26585|55366|284266	CSF1R|EGFR|RBPJ|IL6|LIF|PRKCA|RAC2|TGM2|GDF5|GPNMB|GREM1|LGR4|SIGLEC15	-1.66377	0	71	0	0	-3.37622	4.99897
1	-2.92121	GO:0046850	M1	1	0	GO Biological Processes	19	regulation of bone remodeling	-2.92121	4.99897	4.44125	24155	48	604	6	0.993377	0.403525	1436|1956|3569|5578|26585|284266	CSF1R|EGFR|IL6|PRKCA|GREM1|SIGLEC15	-1.44189	0	71	0	0	-3.37622	4.99897
1	-2.51286	GO:0045124	M1	1	0	GO Biological Processes	19	regulation of bone resorption	-2.51286	4.99897	4.05361	24155	40	604	5	0.827815	0.368674	1436|1956|3569|5578|284266	CSF1R|EGFR|IL6|PRKCA|SIGLEC15	-1.12238	0	71	0	0	-3.37622	4.99897
1	-2.34889	GO:0045453	M1	1	0	GO Biological Processes	19	bone resorption	-2.34889	3.87017	3.62381	24155	62	604	6	0.993377	0.403525	1436|1956|3569|5578|5880|284266	CSF1R|EGFR|IL6|PRKCA|RAC2|SIGLEC15	-0.997965	0	71	0	0	-3.37622	4.99897
1	-2.15785	GO:0034103	M1	1	0	GO Biological Processes	19	regulation of tissue remodeling	-2.15785	3.14542	3.24723	24155	89	604	7	1.15894	0.435493	1436|1956|3569|5578|10457|26585|284266	CSF1R|EGFR|IL6|PRKCA|GPNMB|GREM1|SIGLEC15	-0.855838	0	71	0	0	-3.37622	4.99897
1	-3.37038	hsa04151	M1	1	0	KEGG Pathway	24	PI3K-Akt signaling pathway	-3.37038	2.3387	3.99298	24155	342	604	20	3.31126	0.728058	672|1436|1956|2057|2247|3082|3320|3569|3655|3673|4602|5515|5578|6446|7534|10971|28227|56034|64764|284217	BRCA1|CSF1R|EGFR|EPOR|FGF2|HGF|HSP90AA1|IL6|ITGA6|ITGA2|MYB|PPP2CA|PRKCA|SGK1|YWHAZ|YWHAQ|PPP2R3B|PDGFC|CREB3L2|LAMA1	-1.80565	0	72	1	1	-3.37038	7.40587
1	-3.30816	R-HSA-3000170	M1	1	0	Reactome Gene Sets	6	Syndecan interactions	-3.30816	7.40587	5.33345	24155	27	604	5	0.827815	0.368674	2247|3655|3673|5578|6382	FGF2|ITGA6|ITGA2|PRKCA|SDC1	-1.75029	0	72	0	0	-3.37038	7.40587
1	-3.1852	R-HSA-3000171	M1	1	0	Reactome Gene Sets	6	Non-integrin membrane-ECM interactions	-3.1852	4.74478	4.61199	24155	59	604	7	1.15894	0.435493	2247|3655|3673|5578|6382|59277|284217	FGF2|ITGA6|ITGA2|PRKCA|SDC1|NTN4|LAMA1	-1.65013	0	72	0	0	-3.37038	7.40587
1	-2.61396	hsa05200	M1	1	0	KEGG Pathway	24	Pathways in cancer	-2.61396	2.0249	3.289	24155	395	604	20	3.31126	0.728058	332|1163|1436|1956|2247|2956|3082|3320|3569|3655|3673|5467|5578|5743|5880|6932|7039|7477|9063|284217	BIRC5|CKS1B|CSF1R|EGFR|FGF2|MSH6|HGF|HSP90AA1|IL6|ITGA6|ITGA2|PPARD|PRKCA|PTGS2|RAC2|TCF7|TGFA|WNT7B|PIAS2|LAMA1	-1.20113	0	72	0	0	-3.37038	7.40587
1	-2.13426	hsa04810	M1	1	0	KEGG Pathway	24	Regulation of actin cytoskeleton	-2.13426	2.26368	2.95954	24155	212	604	12	1.98675	0.567801	1131|1956|2247|3655|3673|5880|7074|10298|10458|10552|56034|81624	CHRM3|EGFR|FGF2|ITGA6|ITGA2|RAC2|TIAM1|PAK4|BAIAP2|ARPC1A|PDGFC|DIAPH3	-0.837904	0	72	0	0	-3.37038	7.40587
1	-2.04359	GO:0040017	M1	1	0	GO Biological Processes	19	positive regulation of locomotion	-2.04359	1.67189	2.6644	24155	598	604	25	4.13907	0.810502	1436|1839|1956|2150|2247|3082|3569|3655|3673|5054|5578|5743|5880|7074|9126|9353|10253|10371|10457|10982|11116|27086|51512|56034|57580	CSF1R|HBEGF|EGFR|F2RL1|FGF2|HGF|IL6|ITGA6|ITGA2|SERPINE1|PRKCA|PTGS2|RAC2|TIAM1|SMC3|SLIT2|SPRY2|SEMA3A|GPNMB|MAPRE2|FGFR1OP|FOXP1|GTSE1|PDGFC|PREX1	-0.76546	0	72	0	0	-3.37038	7.40587
1	-3.29661	R-HSA-420597	M1	1	0	Reactome Gene Sets	6	Nectin/Necl trans heterodimerization	-3.29661	17.1393	6.83914	24155	7	604	3	0.496689	0.28605	5817|5818|23705	PVR|NECTIN1|CADM1	-1.74325	0	73	1	1	-3.29661	17.1393
1	-2.04997	R-HSA-418990	M1	1	0	Reactome Gene Sets	6	Adherens junctions interactions	-2.04997	4.84748	3.54189	24155	33	604	4	0.662252	0.330028	1004|5817|5818|23705	CDH6|PVR|NECTIN1|CADM1	-0.770656	0	73	0	0	-3.29661	17.1393
1	-3.25617	GO:0048820	M1	1	0	GO Biological Processes	19	hair follicle maturation	-3.25617	9.99793	5.76569	24155	16	604	4	0.662252	0.330028	3516|51083|54888|55612	RBPJ|GAL|NSUN2|FERMT1	-1.70948	0	74	1	1	-3.25617	9.99793
1	-3.02545	GO:0071695	M1	1	0	GO Biological Processes	19	anatomical structure maturation	-3.02545	2.90849	3.93935	24155	165	604	12	1.98675	0.567801	372|891|994|3516|7298|9319|26585|51083|54888|55612|56975|59277	ARCN1|CCNB1|CDC25B|RBPJ|TYMS|TRIP13|GREM1|GAL|NSUN2|FERMT1|FAM20C|NTN4	-1.52481	0	74	0	0	-3.25617	9.99793
1	-2.6949	GO:0042303	M1	1	0	GO Biological Processes	19	molting cycle	-2.6949	3.21362	3.76033	24155	112	604	9	1.49007	0.492974	1956|3516|3884|5743|51083|54888|55366|55612|94234	EGFR|RBPJ|KRT33B|PTGS2|GAL|NSUN2|LGR4|FERMT1|FOXQ1	-1.25867	0	74	0	0	-3.25617	9.99793
1	-2.6949	GO:0042633	M1	1	0	GO Biological Processes	19	hair cycle	-2.6949	3.21362	3.76033	24155	112	604	9	1.49007	0.492974	1956|3516|3884|5743|51083|54888|55366|55612|94234	EGFR|RBPJ|KRT33B|PTGS2|GAL|NSUN2|LGR4|FERMT1|FOXQ1	-1.25867	0	74	0	0	-3.25617	9.99793
1	-2.47115	GO:0008544	M1	1	0	GO Biological Processes	19	epidermis development	-2.47115	1.89616	3.12148	24155	464	604	22	3.64238	0.762285	646|865|1382|1956|2146|2312|3516|3866|3880|3884|3885|5317|5467|5744|7027|9555|23764|51083|54888|55366|55612|94234	BNC1|CBFB|CRABP2|EGFR|EZH2|FLG|RBPJ|KRT15|KRT19|KRT33B|KRT34|PKP1|PPARD|PTHLH|TFDP1|MACROH2A1|MAFF|GAL|NSUN2|LGR4|FERMT1|FOXQ1	-1.09012	0	74	0	0	-3.25617	9.99793
1	-2.26588	GO:0045682	M1	1	0	GO Biological Processes	19	regulation of epidermis development	-2.26588	3.29344	3.39208	24155	85	604	7	1.15894	0.435493	865|2146|5467|9555|23764|51083|55612	CBFB|EZH2|PPARD|MACROH2A1|MAFF|GAL|FERMT1	-0.930157	0	74	0	0	-3.25617	9.99793
1	-2.25788	GO:0021700	M1	1	0	GO Biological Processes	19	developmental maturation	-2.25788	2.11224	3.01947	24155	284	604	15	2.48344	0.63321	372|865|891|994|3516|7298|7534|9319|9928|26585|51083|54888|55612|56975|59277	ARCN1|CBFB|CCNB1|CDC25B|RBPJ|TYMS|YWHAZ|TRIP13|KIF14|GREM1|GAL|NSUN2|FERMT1|FAM20C|NTN4	-0.924412	0	74	0	0	-3.25617	9.99793
1	-2.23823	GO:0001942	M1	1	0	GO Biological Processes	19	hair follicle development	-2.23823	3.25514	3.35507	24155	86	604	7	1.15894	0.435493	1956|3516|51083|54888|55366|55612|94234	EGFR|RBPJ|GAL|NSUN2|LGR4|FERMT1|FOXQ1	-0.915002	0	74	0	0	-3.25617	9.99793
1	-2.18422	GO:0022404	M1	1	0	GO Biological Processes	19	molting cycle process	-2.18422	3.18116	3.28266	24155	88	604	7	1.15894	0.435493	1956|3516|51083|54888|55366|55612|94234	EGFR|RBPJ|GAL|NSUN2|LGR4|FERMT1|FOXQ1	-0.874002	0	74	0	0	-3.25617	9.99793
1	-2.18422	GO:0022405	M1	1	0	GO Biological Processes	19	hair cycle process	-2.18422	3.18116	3.28266	24155	88	604	7	1.15894	0.435493	1956|3516|51083|54888|55366|55612|94234	EGFR|RBPJ|GAL|NSUN2|LGR4|FERMT1|FOXQ1	-0.874002	0	74	0	0	-3.25617	9.99793
1	-2.18422	GO:0098773	M1	1	0	GO Biological Processes	19	skin epidermis development	-2.18422	3.18116	3.28266	24155	88	604	7	1.15894	0.435493	1956|3516|51083|54888|55366|55612|94234	EGFR|RBPJ|GAL|NSUN2|LGR4|FERMT1|FOXQ1	-0.874002	0	74	0	0	-3.25617	9.99793
1	-3.25617	GO:0003222	M1	1	0	GO Biological Processes	19	ventricular trabecula myocardium morphogenesis	-3.25617	9.99793	5.76569	24155	16	604	4	0.662252	0.330028	2022|3084|3516|57493	ENG|NRG1|RBPJ|HEG1	-1.70948	0	75	1	1	-3.25617	10.9068
1	-2.6557	GO:0060379	M1	1	0	GO Biological Processes	19	cardiac muscle cell myoblast differentiation	-2.6557	10.9068	5.26302	24155	11	604	3	0.496689	0.28605	3084|3516|26585	NRG1|RBPJ|GREM1	-1.23136	0	75	0	0	-3.25617	10.9068
1	-2.433	GO:0007171	M1	1	0	GO Biological Processes	19	activation of transmembrane receptor protein tyrosine kinase activity	-2.433	9.22886	4.75262	24155	13	604	3	0.496689	0.28605	3084|26585|56034	NRG1|GREM1|PDGFC	-1.0629	0	75	0	0	-3.25617	10.9068
1	-2.20727	GO:0061383	M1	1	0	GO Biological Processes	19	trabecula morphogenesis	-2.20727	4.25444	3.57645	24155	47	604	5	0.827815	0.368674	2022|3084|3516|26585|57493	ENG|NRG1|RBPJ|GREM1|HEG1	-0.891033	0	75	0	0	-3.25617	10.9068
1	-2.09758	GO:0061384	M1	1	0	GO Biological Processes	19	heart trabecula morphogenesis	-2.09758	4.99897	3.62506	24155	32	604	4	0.662252	0.330028	2022|3084|3516|57493	ENG|NRG1|RBPJ|HEG1	-0.806739	0	75	0	0	-3.25617	10.9068
1	-3.17133	GO:0007569	M1	1	0	GO Biological Processes	19	cell aging	-3.17133	3.44756	4.23168	24155	116	604	10	1.65563	0.519204	2022|2305|3014|3159|3987|4000|5054|8091|23636|83596	ENG|FOXM1|H2AX|HMGA1|LIMS1|LMNA|SERPINE1|HMGA2|NUP62|BCL2L12	-1.64033	0	76	1	1	-3.17133	3.44756
1	-2.49865	GO:0007568	M1	1	0	GO Biological Processes	19	aging	-2.49865	2.11794	3.2291	24155	321	604	17	2.81457	0.672958	218|2022|2305|2956|3014|3159|3884|3987|4000|5054|5743|7298|8091|8438|23636|27429|83596	ALDH3A1|ENG|FOXM1|MSH6|H2AX|HMGA1|KRT33B|LIMS1|LMNA|SERPINE1|PTGS2|TYMS|HMGA2|RAD54L|NUP62|HTRA2|BCL2L12	-1.11053	0	76	0	0	-3.17133	3.44756
1	-3.17119	M145	M1	1	0	Canonical Pathways	11	PID P53 DOWNSTREAM PATHWAY	-3.17119	3.21101	4.15615	24155	137	604	11	1.82119	0.544087	174|891|1434|1956|3082|3976|5054|5111|7027|7039|8797	AFP|CCNB1|CSE1L|EGFR|HGF|LIF|SERPINE1|PCNA|TFDP1|TGFA|TNFRSF10A	-1.64033	0	77	1	1	-3.17119	4.76092
1	-2.41908	M174	M1	1	0	Canonical Pathways	11	PID UPA UPAR PATHWAY	-2.41908	4.76092	3.90662	24155	42	604	5	0.827815	0.368674	1956|3082|4314|5054|5329	EGFR|HGF|MMP3|SERPINE1|PLAUR	-1.05287	0	77	0	0	-3.17119	4.76092
1	-3.17102	GO:0002200	M1	1	0	GO Biological Processes	19	somatic diversification of immune receptors	-3.17102	4.15498	4.44059	24155	77	604	8	1.3245	0.465171	2956|3978|6932|7468|9156|10721|23529|118460	MSH6|LIG1|TCF7|NSD2|EXO1|POLQ|CLCF1|EXOSC6	-1.64033	0	78	1	1	-3.17102	6.66529
1	-2.97147	GO:0002562	M1	1	0	GO Biological Processes	19	somatic diversification of immune receptors via germline recombination within a single locus	-2.97147	4.37409	4.32841	24155	64	604	7	1.15894	0.435493	2956|3978|6932|7468|9156|23529|118460	MSH6|LIG1|TCF7|NSD2|EXO1|CLCF1|EXOSC6	-1.47989	0	78	0	0	-3.17102	6.66529
1	-2.97147	GO:0016444	M1	1	0	GO Biological Processes	19	somatic cell DNA recombination	-2.97147	4.37409	4.32841	24155	64	604	7	1.15894	0.435493	2956|3978|6932|7468|9156|23529|118460	MSH6|LIG1|TCF7|NSD2|EXO1|CLCF1|EXOSC6	-1.47989	0	78	0	0	-3.17102	6.66529
1	-2.63629	GO:0002312	M1	1	0	GO Biological Processes	19	B cell activation involved in immune response	-2.63629	3.83482	3.88463	24155	73	604	7	1.15894	0.435493	1880|2956|7468|9156|23529|55619|118460	GPR183|MSH6|NSD2|EXO1|CLCF1|DOCK10|EXOSC6	-1.21911	0	78	0	0	-3.17102	6.66529
1	-2.41432	GO:0000018	M1	1	0	GO Biological Processes	19	regulation of DNA recombination	-2.41432	3.16766	3.49596	24155	101	604	8	1.3245	0.465171	2956|7468|8914|10635|10721|23529|51750|118460	MSH6|NSD2|TIMELESS|RAD51AP1|POLQ|CLCF1|RTEL1|EXOSC6	-1.04909	0	78	0	0	-3.17102	6.66529
1	-2.28081	GO:0016445	M1	1	0	GO Biological Processes	19	somatic diversification of immunoglobulins	-2.28081	3.74922	3.5268	24155	64	604	6	0.993377	0.403525	2956|7468|9156|10721|23529|118460	MSH6|NSD2|EXO1|POLQ|CLCF1|EXOSC6	-0.943272	0	78	0	0	-3.17102	6.66529
1	-2.20727	GO:0002204	M1	1	0	GO Biological Processes	19	somatic recombination of immunoglobulin genes involved in immune response	-2.20727	4.25444	3.57645	24155	47	604	5	0.827815	0.368674	2956|7468|9156|23529|118460	MSH6|NSD2|EXO1|CLCF1|EXOSC6	-0.891033	0	78	0	0	-3.17102	6.66529
1	-2.20727	GO:0002208	M1	1	0	GO Biological Processes	19	somatic diversification of immunoglobulins involved in immune response	-2.20727	4.25444	3.57645	24155	47	604	5	0.827815	0.368674	2956|7468|9156|23529|118460	MSH6|NSD2|EXO1|CLCF1|EXOSC6	-0.891033	0	78	0	0	-3.17102	6.66529
1	-2.20727	GO:0045190	M1	1	0	GO Biological Processes	19	isotype switching	-2.20727	4.25444	3.57645	24155	47	604	5	0.827815	0.368674	2956|7468|9156|23529|118460	MSH6|NSD2|EXO1|CLCF1|EXOSC6	-0.891033	0	78	0	0	-3.17102	6.66529
1	-2.02237	GO:0016447	M1	1	0	GO Biological Processes	19	somatic recombination of immunoglobulin gene segments	-2.02237	3.84536	3.28936	24155	52	604	5	0.827815	0.368674	2956|7468|9156|23529|118460	MSH6|NSD2|EXO1|CLCF1|EXOSC6	-0.748584	0	78	0	0	-3.17102	6.66529
1	-2.01796	GO:0016446	M1	1	0	GO Biological Processes	19	somatic hypermutation of immunoglobulin genes	-2.01796	6.66529	3.85057	24155	18	604	3	0.496689	0.28605	2956|9156|10721	MSH6|EXO1|POLQ	-0.746526	0	78	0	0	-3.17102	6.66529
1	-3.14829	R-HSA-450604	M1	1	0	Reactome Gene Sets	6	KSRP (KHSRP) binds and destabilizes mRNA	-3.14829	9.40982	5.5548	24155	17	604	4	0.662252	0.330028	5393|7534|11340|118460	EXOSC9|YWHAZ|EXOSC8|EXOSC6	-1.62174	0	79	1	1	-3.14829	14.9969
1	-3.10064	GO:0034475	M1	1	0	GO Biological Processes	19	U4 snRNA 3'-end processing	-3.10064	14.9969	6.34094	24155	8	604	3	0.496689	0.28605	5393|11340|118460	EXOSC9|EXOSC8|EXOSC6	-1.58655	0	79	0	0	-3.14829	14.9969
1	-2.78589	CORUM:788	M1	1	0	CORUM	33	Exosome	-2.78589	11.9975	5.57044	24155	10	604	3	0.496689	0.28605	5393|11340|118460	EXOSC9|EXOSC8|EXOSC6	-1.33286	0	79	0	0	-3.14829	14.9969
1	-2.78589	GO:0034427	M1	1	0	GO Biological Processes	19	nuclear-transcribed mRNA catabolic process, exonucleolytic, 3'-5'	-2.78589	11.9975	5.57044	24155	10	604	3	0.496689	0.28605	5393|11340|118460	EXOSC9|EXOSC8|EXOSC6	-1.33286	0	79	0	0	-3.14829	14.9969
1	-2.6557	CORUM:789	M1	1	0	CORUM	33	Exosome	-2.6557	10.9068	5.26302	24155	11	604	3	0.496689	0.28605	5393|11340|118460	EXOSC9|EXOSC8|EXOSC6	-1.23136	0	79	0	0	-3.14829	14.9969
1	-2.53886	CORUM:7443	M1	1	0	CORUM	33	Exosome	-2.53886	9.99793	4.99282	24155	12	604	3	0.496689	0.28605	5393|11340|118460	EXOSC9|EXOSC8|EXOSC6	-1.14352	0	79	0	0	-3.14829	14.9969
1	-2.433	GO:0071027	M1	1	0	GO Biological Processes	19	nuclear RNA surveillance	-2.433	9.22886	4.75262	24155	13	604	3	0.496689	0.28605	5393|11340|118460	EXOSC9|EXOSC8|EXOSC6	-1.0629	0	79	0	0	-3.14829	14.9969
1	-2.433	GO:0071028	M1	1	0	GO Biological Processes	19	nuclear mRNA surveillance	-2.433	9.22886	4.75262	24155	13	604	3	0.496689	0.28605	5393|11340|118460	EXOSC9|EXOSC8|EXOSC6	-1.0629	0	79	0	0	-3.14829	14.9969
1	-2.2475	GO:0071025	M1	1	0	GO Biological Processes	19	RNA surveillance	-2.2475	7.99834	4.34191	24155	15	604	3	0.496689	0.28605	5393|11340|118460	EXOSC9|EXOSC8|EXOSC6	-0.921632	0	79	0	0	-3.14829	14.9969
1	-2.16538	R-HSA-429958	M1	1	0	Reactome Gene Sets	6	mRNA decay by 3' to 5' exoribonuclease	-2.16538	7.49845	4.16407	24155	16	604	3	0.496689	0.28605	5393|11340|118460	EXOSC9|EXOSC8|EXOSC6	-0.861523	0	79	0	0	-3.14829	14.9969
1	-2.08911	R-HSA-450385	M1	1	0	Reactome Gene Sets	6	Butyrate Response Factor 1 (BRF1) binds and destabilizes mRNA	-2.08911	7.05736	4.00097	24155	17	604	3	0.496689	0.28605	5393|11340|118460	EXOSC9|EXOSC8|EXOSC6	-0.803783	0	79	0	0	-3.14829	14.9969
1	-2.08911	R-HSA-450513	M1	1	0	Reactome Gene Sets	6	Tristetraprolin (TTP, ZFP36) binds and destabilizes mRNA	-2.08911	7.05736	4.00097	24155	17	604	3	0.496689	0.28605	5393|11340|118460	EXOSC9|EXOSC8|EXOSC6	-0.803783	0	79	0	0	-3.14829	14.9969
1	-3.09654	M66	M1	1	0	Canonical Pathways	11	PID MYC ACTIV PATHWAY	-3.09654	4.04979	4.34811	24155	79	604	8	1.3245	0.465171	86|332|891|993|3159|3320|8061|83879	ACTL6A|BIRC5|CCNB1|CDC25A|HMGA1|HSP90AA1|FOSL1|CDCA7	-1.58586	0	80	1	1	-3.09654	4.04979
1	-3.09525	GO:0031960	M1	1	0	GO Biological Processes	19	response to corticosteroid	-3.09525	2.96235	4.01328	24155	162	604	12	1.98675	0.567801	218|1956|2022|2354|3569|5111|5743|6382|7298|7477|8061|9353	ALDH3A1|EGFR|ENG|FOSB|IL6|PCNA|PTGS2|SDC1|TYMS|WNT7B|FOSL1|SLIT2	-1.58524	0	81	1	1	-3.09525	3.01307
1	-2.94304	GO:0051384	M1	1	0	GO Biological Processes	19	response to glucocorticoid	-2.94304	3.01307	3.90713	24155	146	604	11	1.82119	0.544087	218|1956|2354|3569|5111|5743|6382|7298|7477|8061|9353	ALDH3A1|EGFR|FOSB|IL6|PCNA|PTGS2|SDC1|TYMS|WNT7B|FOSL1|SLIT2	-1.45864	0	81	0	0	-3.09525	3.01307
1	-2.74276	GO:0048545	M1	1	0	GO Biological Processes	19	response to steroid hormone	-2.74276	2.07749	3.41301	24155	385	604	20	3.31126	0.728058	218|672|865|1956|2022|2354|3569|4015|5111|5467|5743|6382|7298|7477|8061|9063|9125|9353|27086|79447	ALDH3A1|BRCA1|CBFB|EGFR|ENG|FOSB|IL6|LOX|PCNA|PPARD|PTGS2|SDC1|TYMS|WNT7B|FOSL1|PIAS2|CNOT9|SLIT2|FOXP1|PAGR1	-1.29819	0	81	0	0	-3.09525	3.01307
1	-3.02074	hsa01523	M1	1	0	KEGG Pathway	24	Antifolate resistance	-3.02074	6.45028	4.86276	24155	31	604	5	0.827815	0.368674	1719|2352|3569|7298|113235	DHFR|FOLR3|IL6|TYMS|SLC46A1	-1.52153	0	82	1	1	-3.02074	6.45028
1	-3.02023	M239	M1	1	0	Canonical Pathways	11	PID A6B1 A6B4 INTEGRIN PATHWAY	-3.02023	5.21631	4.58385	24155	46	604	6	0.993377	0.403525	1956|3655|5578|7534|10971|284217	EGFR|ITGA6|PRKCA|YWHAZ|YWHAQ|LAMA1	-1.52153	0	83	1	1	-3.02023	9.22886
1	-2.433	R-HSA-75035	M1	1	0	Reactome Gene Sets	6	Chk1/Chk2(Cds1) mediated inactivation of Cyclin B:Cdk1 complex	-2.433	9.22886	4.75262	24155	13	604	3	0.496689	0.28605	891|7534|10971	CCNB1|YWHAZ|YWHAQ	-1.0629	0	83	0	0	-3.02023	9.22886
1	-2.31199	M164	M1	1	0	Canonical Pathways	11	PID ERBB1 DOWNSTREAM PATHWAY	-2.31199	3.04699	3.36636	24155	105	604	8	1.3245	0.465171	1956|5515|5578|7534|9610|10458|10971|81624	EGFR|PPP2CA|PRKCA|YWHAZ|RIN1|BAIAP2|YWHAQ|DIAPH3	-0.968499	0	83	0	0	-3.02023	9.22886
1	-2.16538	CORUM:5199	M1	1	0	CORUM	33	Kinase maturation complex 1	-2.16538	7.49845	4.16407	24155	16	604	3	0.496689	0.28605	3320|7534|10971	HSP90AA1|YWHAZ|YWHAQ	-0.861523	0	83	0	0	-3.02023	9.22886
1	-2.95588	GO:0021772	M1	1	0	GO Biological Processes	19	olfactory bulb development	-2.95588	6.24871	4.75795	24155	32	604	5	0.827815	0.368674	1436|2131|9353|9928|10371	CSF1R|EXT1|SLIT2|KIF14|SEMA3A	-1.46957	0	84	1	1	-2.95588	6.24871
1	-2.89345	GO:0021988	M1	1	0	GO Biological Processes	19	olfactory lobe development	-2.89345	6.05935	4.65751	24155	33	604	5	0.827815	0.368674	1436|2131|9353|9928|10371	CSF1R|EXT1|SLIT2|KIF14|SEMA3A	-1.41852	0	84	0	0	-2.95588	6.24871
1	-2.25216	GO:0006929	M1	1	0	GO Biological Processes	19	substrate-dependent cell migration	-2.25216	5.5161	3.89698	24155	29	604	4	0.662252	0.330028	3673|9353|10371|51330	ITGA2|SLIT2|SEMA3A|TNFRSF12A	-0.923175	0	84	0	0	-2.95588	6.24871
1	-2.95372	GO:0051546	M1	1	0	GO Biological Processes	19	keratinocyte migration	-2.95372	8.41931	5.18103	24155	19	604	4	0.662252	0.330028	1839|5467|10982|55612	HBEGF|PPARD|MAPRE2|FERMT1	-1.46805	0	85	1	1	-2.95372	8.41931
1	-2.89345	GO:0040001	M1	1	0	GO Biological Processes	19	establishment of mitotic spindle localization	-2.89345	6.05935	4.65751	24155	33	604	5	0.827815	0.368674	4085|10253|51203|54908|89958	MAD2L1|SPRY2|NUSAP1|SPDL1|SAPCD2	-1.41852	0	86	1	1	-2.89345	6.05935
1	-2.37425	GO:0051293	M1	1	0	GO Biological Processes	19	establishment of spindle localization	-2.37425	4.6502	3.83657	24155	43	604	5	0.827815	0.368674	4085|10253|51203|54908|89958	MAD2L1|SPRY2|NUSAP1|SPDL1|SAPCD2	-1.01671	0	86	0	0	-2.89345	6.05935
1	-2.25216	GO:0000132	M1	1	0	GO Biological Processes	19	establishment of mitotic spindle orientation	-2.25216	5.5161	3.89698	24155	29	604	4	0.662252	0.330028	4085|10253|54908|89958	MAD2L1|SPRY2|SPDL1|SAPCD2	-0.923175	0	86	0	0	-2.89345	6.05935
1	-2.16833	GO:0051653	M1	1	0	GO Biological Processes	19	spindle localization	-2.16833	4.1658	3.51594	24155	48	604	5	0.827815	0.368674	4085|10253|51203|54908|89958	MAD2L1|SPRY2|NUSAP1|SPDL1|SAPCD2	-0.861523	0	86	0	0	-2.89345	6.05935
1	-2.13426	GO:0007163	M1	1	0	GO Biological Processes	19	establishment or maintenance of cell polarity	-2.13426	2.26368	2.95954	24155	212	604	12	1.98675	0.567801	1794|3320|4000|4085|7477|9793|10253|54908|55612|89958|154796|284217	DOCK2|HSP90AA1|LMNA|MAD2L1|WNT7B|CKAP5|SPRY2|SPDL1|FERMT1|SAPCD2|AMOT|LAMA1	-0.837904	0	86	0	0	-2.89345	6.05935
1	-2.11721	GO:0030010	M1	1	0	GO Biological Processes	19	establishment of cell polarity	-2.11721	2.62719	3.05872	24155	137	604	9	1.49007	0.492974	1794|3320|4085|10253|54908|55612|89958|154796|284217	DOCK2|HSP90AA1|MAD2L1|SPRY2|SPDL1|FERMT1|SAPCD2|AMOT|LAMA1	-0.824972	0	86	0	0	-2.89345	6.05935
1	-2.86958	GO:0030324	M1	1	0	GO Biological Processes	19	lung development	-2.86958	2.79012	3.77314	24155	172	604	12	1.98675	0.567801	1956|3516|3976|4015|5251|6664|7477|8914|10253|57493|84695|284217	EGFR|RBPJ|LIF|LOX|PHEX|SOX11|WNT7B|TIMELESS|SPRY2|HEG1|LOXL3|LAMA1	-1.40085	0	87	1	1	-2.86958	3.99917
1	-2.78467	GO:0030323	M1	1	0	GO Biological Processes	19	respiratory tube development	-2.78467	2.72671	3.68187	24155	176	604	12	1.98675	0.567801	1956|3516|3976|4015|5251|6664|7477|8914|10253|57493|84695|284217	EGFR|RBPJ|LIF|LOX|PHEX|SOX11|WNT7B|TIMELESS|SPRY2|HEG1|LOXL3|LAMA1	-1.33223	0	87	0	0	-2.86958	3.99917
1	-2.36512	GO:0060541	M1	1	0	GO Biological Processes	19	respiratory system development	-2.36512	2.42374	3.22148	24155	198	604	12	1.98675	0.567801	1956|3516|3976|4015|5251|6664|7477|8914|10253|57493|84695|284217	EGFR|RBPJ|LIF|LOX|PHEX|SOX11|WNT7B|TIMELESS|SPRY2|HEG1|LOXL3|LAMA1	-1.00995	0	87	0	0	-2.86958	3.99917
1	-2.09347	GO:0060425	M1	1	0	GO Biological Processes	19	lung morphogenesis	-2.09347	3.99917	3.3997	24155	50	604	5	0.827815	0.368674	3976|6664|7477|10253|284217	LIF|SOX11|WNT7B|SPRY2|LAMA1	-0.804908	0	87	0	0	-2.86958	3.99917
1	-2.86542	GO:0072234	M1	1	0	GO Biological Processes	19	metanephric nephron tubule development	-2.86542	7.99834	5.01412	24155	20	604	4	0.662252	0.330028	3976|7477|25937|55366	LIF|WNT7B|WWTR1|LGR4	-1.39791	0	88	1	1	-2.86542	7.99834
1	-2.6293	GO:0072170	M1	1	0	GO Biological Processes	19	metanephric tubule development	-2.6293	6.95508	4.57576	24155	23	604	4	0.662252	0.330028	3976|7477|25937|55366	LIF|WNT7B|WWTR1|LGR4	-1.21431	0	88	0	0	-2.86542	7.99834
1	-2.6293	GO:0072243	M1	1	0	GO Biological Processes	19	metanephric nephron epithelium development	-2.6293	6.95508	4.57576	24155	23	604	4	0.662252	0.330028	3976|7477|25937|55366	LIF|WNT7B|WWTR1|LGR4	-1.21431	0	88	0	0	-2.86542	7.99834
1	-2.36648	GO:0072207	M1	1	0	GO Biological Processes	19	metanephric epithelium development	-2.36648	5.9247	4.10024	24155	27	604	4	0.662252	0.330028	3976|7477|25937|55366	LIF|WNT7B|WWTR1|LGR4	-1.01083	0	88	0	0	-2.86542	7.99834
1	-2.82242	GO:0031099	M1	1	0	GO Biological Processes	19	regeneration	-2.82242	2.62572	3.6785	24155	198	604	13	2.15232	0.590487	891|1719|1956|2146|2596|3082|4147|5111|5315|5467|5792|7104|7298	CCNB1|DHFR|EGFR|EZH2|GAP43|HGF|MATN2|PCNA|PKM|PPARD|PTPRF|TM4SF4|TYMS	-1.36281	0	89	1	1	-2.82242	5.33223
1	-2.59098	GO:0035690	M1	1	0	GO Biological Processes	19	cellular response to drug	-2.59098	2.05919	3.2835	24155	369	604	19	3.1457	0.710231	672|1131|1956|2146|3082|3178|3184|3569|4314|4602|5111|5743|8091|8914|9353|10276|10458|26191|116372	BRCA1|CHRM3|EGFR|EZH2|HGF|HNRNPA1|HNRNPD|IL6|MMP3|MYB|PCNA|PTGS2|HMGA2|TIMELESS|SLIT2|NET1|BAIAP2|PTPN22|LYPD1	-1.183	0	89	0	0	-2.82242	5.33223
1	-2.19854	GO:0097421	M1	1	0	GO Biological Processes	19	liver regeneration	-2.19854	5.33223	3.8023	24155	30	604	4	0.662252	0.330028	1956|2146|5111|7298	EGFR|EZH2|PCNA|TYMS	-0.884889	0	89	0	0	-2.82242	5.33223
1	-2.1576	GO:0001889	M1	1	0	GO Biological Processes	19	liver development	-2.1576	2.66611	3.10881	24155	135	604	9	1.49007	0.492974	1956|2146|3082|3184|3673|5111|5315|7298|144455	EGFR|EZH2|HGF|HNRNPD|ITGA2|PCNA|PKM|TYMS|E2F7	-0.855838	0	89	0	0	-2.82242	5.33223
1	-2.09734	GO:0061008	M1	1	0	GO Biological Processes	19	hepaticobiliary system development	-2.09734	2.60816	3.03401	24155	138	604	9	1.49007	0.492974	1956|2146|3082|3184|3673|5111|5315|7298|144455	EGFR|EZH2|HGF|HNRNPD|ITGA2|PCNA|PKM|TYMS|E2F7	-0.806739	0	89	0	0	-2.82242	5.33223
1	-2.00603	GO:0031100	M1	1	0	GO Biological Processes	19	animal organ regeneration	-2.00603	3.28699	3.13392	24155	73	604	6	0.993377	0.403525	1956|2146|3082|5111|5315|7298	EGFR|EZH2|HGF|PCNA|PKM|TYMS	-0.737064	0	89	0	0	-2.82242	5.33223
1	-2.00512	GO:0034614	M1	1	0	GO Biological Processes	19	cellular response to reactive oxygen species	-2.00512	2.38046	2.8754	24155	168	604	10	1.65563	0.519204	1719|1956|2146|3082|3184|3569|4314|4602|5111|10276	DHFR|EGFR|EZH2|HGF|HNRNPD|IL6|MMP3|MYB|PCNA|NET1	-0.736797	0	89	0	0	-2.82242	5.33223
1	-2.78861	R-HSA-1474244	M1	1	0	Reactome Gene Sets	6	Extracellular matrix organization	-2.78861	2.25867	3.51903	24155	301	604	17	2.81457	0.672958	960|1305|1306|2247|3655|3673|4015|4314|4319|4325|5054|5578|6382|8200|59277|84695|284217	CD44|COL13A1|COL15A1|FGF2|ITGA6|ITGA2|LOX|MMP3|MMP10|MMP16|SERPINE1|PRKCA|SDC1|GDF5|NTN4|LOXL3|LAMA1	-1.33286	0	90	1	1	-2.78861	4.25444
1	-2.57801	GO:0030198	M1	1	0	GO Biological Processes	19	extracellular matrix organization	-2.57801	2.05363	3.27073	24155	370	604	19	3.1457	0.710231	165|960|1305|1306|2022|2247|3569|3655|3673|4015|4314|4319|4325|5054|26585|55612|59277|84695|284217	AEBP1|CD44|COL13A1|COL15A1|ENG|FGF2|IL6|ITGA6|ITGA2|LOX|MMP3|MMP10|MMP16|SERPINE1|GREM1|FERMT1|NTN4|LOXL3|LAMA1	-1.1711	0	90	0	0	-2.78861	4.25444
1	-2.55111	M3468	M1	1	0	Canonical Pathways	11	NABA ECM REGULATORS	-2.55111	2.35245	3.35789	24155	238	604	14	2.31788	0.612258	4015|4314|4319|4325|5054|5055|5327|7052|11174|25891|56975|84695|92949|327657	LOX|MMP3|MMP10|MMP16|SERPINE1|SERPINB2|PLAT|TGM2|ADAMTS6|PAMR1|FAM20C|LOXL3|ADAMTSL1|SERPINA9	-1.15054	0	90	0	0	-2.78861	4.25444
1	-2.26094	GO:0043062	M1	1	0	GO Biological Processes	19	extracellular structure organization	-2.26094	1.88196	2.93768	24155	425	604	20	3.31126	0.728058	165|960|1305|1306|2022|2247|3569|3655|3673|4015|4314|4319|4325|5054|6382|26585|55612|59277|84695|284217	AEBP1|CD44|COL13A1|COL15A1|ENG|FGF2|IL6|ITGA6|ITGA2|LOX|MMP3|MMP10|MMP16|SERPINE1|SDC1|GREM1|FERMT1|NTN4|LOXL3|LAMA1	-0.927	0	90	0	0	-2.78861	4.25444
1	-2.20727	GO:0030574	M1	1	0	GO Biological Processes	19	collagen catabolic process	-2.20727	4.25444	3.57645	24155	47	604	5	0.827815	0.368674	1305|1306|4314|4319|4325	COL13A1|COL15A1|MMP3|MMP10|MMP16	-0.891033	0	90	0	0	-2.78861	4.25444
1	-2.78589	GO:0032875	M1	1	0	GO Biological Processes	19	regulation of DNA endoreduplication	-2.78589	11.9975	5.57044	24155	10	604	3	0.496689	0.28605	2956|9126|144455	MSH6|SMC3|E2F7	-1.33286	0	91	1	1	-2.78589	11.9975
1	-2.6557	GO:0042023	M1	1	0	GO Biological Processes	19	DNA endoreduplication	-2.6557	10.9068	5.26302	24155	11	604	3	0.496689	0.28605	2956|9126|144455	MSH6|SMC3|E2F7	-1.23136	0	91	0	0	-2.78589	11.9975
1	-2.33635	R-HSA-68884	M1	1	0	Reactome Gene Sets	6	Mitotic Telophase/Cytokinesis	-2.33635	8.56965	4.53702	24155	14	604	3	0.496689	0.28605	9126|9493|10112	SMC3|KIF23|KIF20A	-0.988222	0	91	0	0	-2.78589	11.9975
1	-2.16538	GO:0044794	M1	1	0	GO Biological Processes	19	positive regulation by host of viral process	-2.16538	7.49845	4.16407	24155	16	604	3	0.496689	0.28605	1436|9126|64710	CSF1R|SMC3|NUCKS1	-0.861523	0	91	0	0	-2.78589	11.9975
1	-2.77524	GO:0001893	M1	1	0	GO Biological Processes	19	maternal placenta development	-2.77524	5.7131	4.46849	24155	35	604	5	0.827815	0.368674	2057|3976|5467|5743|26528	EPOR|LIF|PPARD|PTGS2|DAZAP1	-1.32458	0	92	1	1	-2.77524	6.66529
1	-2.5587	GO:0046697	M1	1	0	GO Biological Processes	19	decidualization	-2.5587	6.66529	4.44681	24155	24	604	4	0.662252	0.330028	2057|3976|5467|5743	EPOR|LIF|PPARD|PTGS2	-1.15709	0	92	0	0	-2.77524	6.66529
1	-2.47216	GO:0007565	M1	1	0	GO Biological Processes	19	female pregnancy	-2.47216	2.49948	3.34064	24155	192	604	12	1.98675	0.567801	231|2057|2354|3673|3976|5467|5671|5678|5743|5744|8061|26528	AKR1B1|EPOR|FOSB|ITGA2|LIF|PPARD|PSG3|PSG9|PTGS2|PTHLH|FOSL1|DAZAP1	-1.09063	0	92	0	0	-2.77524	6.66529
1	-2.39098	GO:0044706	M1	1	0	GO Biological Processes	19	multi-multicellular organism process	-2.39098	2.34186	3.21657	24155	222	604	13	2.15232	0.590487	231|2057|2354|3673|3976|5467|5671|5678|5743|5744|8061|23764|26528	AKR1B1|EPOR|FOSB|ITGA2|LIF|PPARD|PSG3|PSG9|PTGS2|PTHLH|FOSL1|MAFF|DAZAP1	-1.02769	0	92	0	0	-2.77524	6.66529
1	-2.28081	GO:0060135	M1	1	0	GO Biological Processes	19	maternal process involved in female pregnancy	-2.28081	3.74922	3.5268	24155	64	604	6	0.993377	0.403525	231|2057|3976|5467|5743|26528	AKR1B1|EPOR|LIF|PPARD|PTGS2|DAZAP1	-0.943272	0	92	0	0	-2.77524	6.66529
1	-2.75656	hsa04390	M1	1	0	KEGG Pathway	24	Hippo signaling pathway	-2.75656	2.85655	3.70136	24155	154	604	11	1.82119	0.544087	174|332|5054|5515|6932|7477|7534|8200|10971|25937|154796	AFP|BIRC5|SERPINE1|PPP2CA|TCF7|WNT7B|YWHAZ|GDF5|YWHAQ|WWTR1|AMOT	-1.30942	0	93	1	1	-2.75656	2.85655
1	-2.67079	hsa04520	M1	1	0	KEGG Pathway	24	Adherens junction	-2.67079	3.88808	3.93033	24155	72	604	7	1.15894	0.435493	1956|5792|5818|5880|6932|10458|117178	EGFR|PTPRF|NECTIN1|RAC2|TCF7|BAIAP2|SSX2IP	-1.23918	0	94	1	1	-2.67079	3.88808
1	-2.6557	GO:0046607	M1	1	0	GO Biological Processes	19	positive regulation of centrosome cycle	-2.6557	10.9068	5.26302	24155	11	604	3	0.496689	0.28605	5902|10733|23636	RANBP1|PLK4|NUP62	-1.23136	0	95	1	1	-2.6557	10.9068
1	-2.33635	GO:0007100	M1	1	0	GO Biological Processes	19	mitotic centrosome separation	-2.33635	8.56965	4.53702	24155	14	604	3	0.496689	0.28605	3832|5902|23636	KIF11|RANBP1|NUP62	-0.988222	0	95	0	0	-2.6557	10.9068
1	-2.2475	GO:0051299	M1	1	0	GO Biological Processes	19	centrosome separation	-2.2475	7.99834	4.34191	24155	15	604	3	0.496689	0.28605	3832|5902|23636	KIF11|RANBP1|NUP62	-0.921632	0	95	0	0	-2.6557	10.9068
1	-2.6557	GO:0009629	M1	1	0	GO Biological Processes	19	response to gravity	-2.6557	10.9068	5.26302	24155	11	604	3	0.496689	0.28605	5315|6804|8061	PKM|STX1A|FOSL1	-1.23136	0	96	1	1	-2.6557	10.9068
1	-2.61268	M241	M1	1	0	Canonical Pathways	11	PID RAC1 REG PATHWAY	-2.61268	5.26207	4.21074	24155	38	604	5	0.827815	0.368674	1794|7074|29127|55114|57580	DOCK2|TIAM1|RACGAP1|ARHGAP17|PREX1	-1.20106	0	97	1	1	-2.61268	5.26207
1	-2.61268	GO:0016572	M1	1	0	GO Biological Processes	19	histone phosphorylation	-2.61268	5.26207	4.21074	24155	38	604	5	0.827815	0.368674	891|5578|8091|9555|83903	CCNB1|PRKCA|HMGA2|MACROH2A1|HASPIN	-1.20106	0	98	1	1	-2.61268	5.7131
1	-2.30808	GO:0051984	M1	1	0	GO Biological Processes	19	positive regulation of chromosome segregation	-2.30808	5.7131	3.99616	24155	28	604	4	0.662252	0.330028	891|2237|9555|9787	CCNB1|FEN1|MACROH2A1|DLGAP5	-0.966886	0	98	0	0	-2.61268	5.7131
1	-2.53886	GO:0051095	M1	1	0	GO Biological Processes	19	regulation of helicase activity	-2.53886	9.99793	4.99282	24155	12	604	3	0.496689	0.28605	2956|4171|26097	MSH6|MCM2|CHTOP	-1.14352	0	99	1	1	-2.53886	9.99793
1	-2.53886	R-HSA-1474151	M1	1	0	Reactome Gene Sets	6	Tetrahydrobiopterin (BH4) synthesis, recycling, salvage and regulation	-2.53886	9.99793	4.99282	24155	12	604	3	0.496689	0.28605	805|1719|3320	CALM2|DHFR|HSP90AA1	-1.14352	0	100	1	1	-2.53886	9.99793
1	-2.14706	R-HSA-5339562	M1	1	0	Reactome Gene Sets	6	Uptake and actions of bacterial toxins	-2.14706	5.16022	3.71177	24155	31	604	4	0.662252	0.330028	805|1839|3320|6804	CALM2|HBEGF|HSP90AA1|STX1A	-0.848638	0	100	0	0	-2.53886	9.99793
1	-2.52128	GO:0030036	M1	1	0	GO Biological Processes	19	actin cytoskeleton organization	-2.52128	1.73877	3.09854	24155	667	604	29	4.80132	0.869916	120|274|1436|1794|2044|2150|3880|3925|5880|6525|9118|9353|9493|9645|9912|10458|10552|11013|23043|26499|29127|54443|55114|57580|81624|84978|154796|221061|284266	ADD3|BIN1|CSF1R|DOCK2|EPHA5|F2RL1|KRT19|STMN1|RAC2|SMTN|INA|SLIT2|KIF23|MICAL2|ARHGAP44|BAIAP2|ARPC1A|TMSB15A|TNIK|PLEK2|RACGAP1|ANLN|ARHGAP17|PREX1|DIAPH3|FRMD5|AMOT|FAM171A1|SIGLEC15	-1.12853	0	101	1	1	-2.52128	1.73877
1	-2.45739	GO:0097435	M1	1	0	GO Biological Processes	19	supramolecular fiber organization	-2.45739	1.72071	3.03908	24155	674	604	29	4.80132	0.869916	120|165|274|2150|3880|3925|4015|4741|5317|5880|7283|7756|9353|9645|9793|9928|10458|10552|11013|26585|26586|55114|57580|81624|84695|221061|344148|347240|440145	ADD3|AEBP1|BIN1|F2RL1|KRT19|STMN1|LOX|NEFM|PKP1|RAC2|TUBG1|ZNF207|SLIT2|MICAL2|CKAP5|KIF14|BAIAP2|ARPC1A|TMSB15A|GREM1|CKAP2|ARHGAP17|PREX1|DIAPH3|LOXL3|FAM171A1|NCKAP5|KIF24|MZT1	-1.07956	0	101	0	0	-2.52128	1.73877
1	-2.25332	GO:0030029	M1	1	0	GO Biological Processes	19	actin filament-based process	-2.25332	1.63124	2.83171	24155	760	604	31	5.13245	0.897848	120|274|1436|1794|2044|2150|3880|3925|5880|6525|9118|9353|9493|9631|9645|9912|10458|10552|11013|23043|26499|29127|54443|55114|57580|80179|81624|84978|154796|221061|284266	ADD3|BIN1|CSF1R|DOCK2|EPHA5|F2RL1|KRT19|STMN1|RAC2|SMTN|INA|SLIT2|KIF23|NUP155|MICAL2|ARHGAP44|BAIAP2|ARPC1A|TMSB15A|TNIK|PLEK2|RACGAP1|ANLN|ARHGAP17|PREX1|MYO19|DIAPH3|FRMD5|AMOT|FAM171A1|SIGLEC15	-0.923175	0	101	0	0	-2.52128	1.73877
1	-2.51255	GO:0090287	M1	1	0	GO Biological Processes	19	regulation of cellular response to growth factor stimulus	-2.51255	2.18385	3.26501	24155	293	604	16	2.64901	0.653421	1745|2022|2247|3516|4015|6664|8200|9353|10253|26585|55612|55816|56975|79674|201163|387914	DLX1|ENG|FGF2|RBPJ|LOX|SOX11|GDF5|SLIT2|SPRY2|GREM1|FERMT1|DOK5|FAM20C|VEPH1|FLCN|SHISA2	-1.12238	0	102	1	1	-2.51255	4.84748
1	-2.04997	GO:0030513	M1	1	0	GO Biological Processes	19	positive regulation of BMP signaling pathway	-2.04997	4.84748	3.54189	24155	33	604	4	0.662252	0.330028	2022|3516|6664|8200	ENG|RBPJ|SOX11|GDF5	-0.770656	0	102	0	0	-2.51255	4.84748
1	-2.4951	GO:0001944	M1	1	0	GO Biological Processes	19	vasculature development	-2.4951	1.66422	3.04581	24155	793	604	33	5.46358	0.92474	672|1306|1786|2022|2048|2247|3082|3516|3569|3976|4015|5054|5315|5578|5743|5784|7477|8061|8091|9289|9353|10253|10298|10457|11082|11174|26585|51330|56913|57493|144455|154796|284217	BRCA1|COL15A1|DNMT1|ENG|EPHB2|FGF2|HGF|RBPJ|IL6|LIF|LOX|SERPINE1|PKM|PRKCA|PTGS2|PTPN14|WNT7B|FOSL1|HMGA2|ADGRG1|SLIT2|SPRY2|PAK4|GPNMB|ESM1|ADAMTS6|GREM1|TNFRSF12A|C1GALT1|HEG1|E2F7|AMOT|LAMA1	-1.10775	0	103	1	1	-2.4951	1.66422
1	-2.12289	GO:0048514	M1	1	0	GO Biological Processes	19	blood vessel morphogenesis	-2.12289	1.64189	2.72318	24155	682	604	28	4.63576	0.855529	672|1306|2022|2048|2247|3082|3516|3569|4015|5054|5315|5578|5743|7477|8091|9289|9353|10253|10298|10457|11082|26585|51330|56913|57493|144455|154796|284217	BRCA1|COL15A1|ENG|EPHB2|FGF2|HGF|RBPJ|IL6|LOX|SERPINE1|PKM|PRKCA|PTGS2|WNT7B|HMGA2|ADGRG1|SLIT2|SPRY2|PAK4|GPNMB|ESM1|GREM1|TNFRSF12A|C1GALT1|HEG1|E2F7|AMOT|LAMA1	-0.830247	0	103	0	0	-2.4951	1.66422
1	-2.49407	GO:0060997	M1	1	0	GO Biological Processes	19	dendritic spine morphogenesis	-2.49407	4.13707	3.83059	24155	58	604	6	0.993377	0.403525	2048|7074|9912|10458|55619|65981	EPHB2|TIAM1|ARHGAP44|BAIAP2|DOCK10|CAPRIN2	-1.10748	0	104	1	1	-2.49407	7.05736
1	-2.21726	GO:0016358	M1	1	0	GO Biological Processes	19	dendrite development	-2.21726	2.2313	3.02448	24155	233	604	13	2.15232	0.590487	2048|2146|4147|7074|9912|10298|10371|10458|23043|55619|57520|57580|65981	EPHB2|EZH2|MATN2|TIAM1|ARHGAP44|PAK4|SEMA3A|BAIAP2|TNIK|DOCK10|HECW2|PREX1|CAPRIN2	-0.895352	0	104	0	0	-2.49407	7.05736
1	-2.09257	GO:0099173	M1	1	0	GO Biological Processes	19	postsynapse organization	-2.09257	2.45348	2.9818	24155	163	604	10	1.65563	0.519204	2048|2119|2596|7074|9118|9912|10458|55619|58489|65981	EPHB2|ETV5|GAP43|TIAM1|INA|ARHGAP44|BAIAP2|DOCK10|ABHD17C|CAPRIN2	-0.804417	0	104	0	0	-2.49407	7.05736
1	-2.08911	GO:0099010	M1	1	0	GO Biological Processes	19	modification of postsynaptic structure	-2.08911	7.05736	4.00097	24155	17	604	3	0.496689	0.28605	7074|9912|10458	TIAM1|ARHGAP44|BAIAP2	-0.803783	0	104	0	0	-2.49407	7.05736
1	-2.04272	GO:0050807	M1	1	0	GO Biological Processes	19	regulation of synapse organization	-2.04272	2.20138	2.85353	24155	218	604	12	1.98675	0.567801	627|2048|2119|2596|5818|7074|7534|7846|9912|10458|58489|65981	BDNF|EPHB2|ETV5|GAP43|NECTIN1|TIAM1|YWHAZ|TUBA1A|ARHGAP44|BAIAP2|ABHD17C|CAPRIN2	-0.76539	0	104	0	0	-2.49407	7.05736
1	-2.00411	GO:0016601	M1	1	0	GO Biological Processes	19	Rac protein signal transduction	-2.00411	4.70491	3.462	24155	34	604	4	0.662252	0.330028	5880|7074|9912|117178	RAC2|TIAM1|ARHGAP44|SSX2IP	-0.736566	0	104	0	0	-2.49407	7.05736
1	-2.00116	GO:0048813	M1	1	0	GO Biological Processes	19	dendrite morphogenesis	-2.00116	2.51696	2.91365	24155	143	604	9	1.49007	0.492974	2048|7074|9912|10371|10458|23043|55619|57520|65981	EPHB2|TIAM1|ARHGAP44|SEMA3A|BAIAP2|TNIK|DOCK10|HECW2|CAPRIN2	-0.73438	0	104	0	0	-2.49407	7.05736
1	-2.47892	GO:2001233	M1	1	0	GO Biological Processes	19	regulation of apoptotic signaling pathway	-2.47892	1.97004	3.15672	24155	406	604	20	3.31126	0.728058	627|672|960|3082|3655|4000|5054|5329|5743|7027|7534|8797|8915|10197|10962|10971|27429|51330|83596|201163	BDNF|BRCA1|CD44|HGF|ITGA6|LMNA|SERPINE1|PLAUR|PTGS2|TFDP1|YWHAZ|TNFRSF10A|BCL10|PSME3|MLLT11|YWHAQ|HTRA2|TNFRSF12A|BCL2L12|FLCN	-1.09436	0	105	1	1	-2.47892	2.58011
1	-2.26329	GO:2001234	M1	1	0	GO Biological Processes	19	negative regulation of apoptotic signaling pathway	-2.26329	2.2604	3.07578	24155	230	604	13	2.15232	0.590487	627|672|960|3082|3655|4000|5054|5329|5743|8797|10197|27429|83596	BDNF|BRCA1|CD44|HGF|ITGA6|LMNA|SERPINE1|PLAUR|PTGS2|TNFRSF10A|PSME3|HTRA2|BCL2L12	-0.928019	0	105	0	0	-2.47892	2.58011
1	-2.24148	GO:2001236	M1	1	0	GO Biological Processes	19	regulation of extrinsic apoptotic signaling pathway	-2.24148	2.58011	3.1605	24155	155	604	10	1.65563	0.519204	672|3082|3655|4000|5054|8797|8915|10197|27429|51330	BRCA1|HGF|ITGA6|LMNA|SERPINE1|TNFRSF10A|BCL10|PSME3|HTRA2|TNFRSF12A	-0.916489	0	105	0	0	-2.47892	2.58011
1	-2.20296	GO:0010821	M1	1	0	GO Biological Processes	19	regulation of mitochondrion organization	-2.20296	2.41708	3.07311	24155	182	604	11	1.82119	0.544087	3082|4000|5329|5880|7027|7534|10962|10971|27429|80179|201163	HGF|LMNA|PLAUR|RAC2|TFDP1|YWHAZ|MLLT11|YWHAQ|HTRA2|MYO19|FLCN	-0.88758	0	105	0	0	-2.47892	2.58011
1	-2.00964	GO:0097190	M1	1	0	GO Biological Processes	19	apoptotic signaling pathway	-2.00964	1.66079	2.62932	24155	602	604	25	4.13907	0.810502	627|672|960|2956|3082|3655|4000|5054|5329|5467|5578|5743|7027|7534|8797|8915|9833|10197|10962|10971|23643|27429|51330|83596|201163	BDNF|BRCA1|CD44|MSH6|HGF|ITGA6|LMNA|SERPINE1|PLAUR|PPARD|PRKCA|PTGS2|TFDP1|YWHAZ|TNFRSF10A|BCL10|MELK|PSME3|MLLT11|YWHAQ|LY96|HTRA2|TNFRSF12A|BCL2L12|FLCN	-0.738986	0	105	0	0	-2.47892	2.58011
1	-2.4549	GO:1903827	M1	1	0	GO Biological Processes	19	regulation of cellular protein localization	-2.4549	1.83168	3.08241	24155	524	604	24	3.97351	0.794812	627|636|1956|2048|3320|3976|4000|5569|5743|5784|5880|7027|7534|9555|9912|10971|23636|27429|51512|55612|58489|89958|116372|201163	BDNF|BICD1|EGFR|EPHB2|HSP90AA1|LIF|LMNA|PKIA|PTGS2|PTPN14|RAC2|TFDP1|YWHAZ|MACROH2A1|ARHGAP44|YWHAQ|NUP62|HTRA2|GTSE1|FERMT1|ABHD17C|SAPCD2|LYPD1|FLCN	-1.07837	0	106	1	1	-2.4549	1.83168
1	-2.35117	GO:0070201	M1	1	0	GO Biological Processes	19	regulation of establishment of protein localization	-2.35117	1.65741	2.92498	24155	748	604	31	5.13245	0.897848	1436|1956|2044|2150|3569|3783|5467|5569|5578|5743|5784|5880|6804|7027|7074|7468|7534|9912|10971|23636|23705|26191|27086|27429|51512|51768|55366|55612|56666|79651|114548	CSF1R|EGFR|EPHA5|F2RL1|IL6|KCNN4|PPARD|PKIA|PRKCA|PTGS2|PTPN14|RAC2|STX1A|TFDP1|TIAM1|NSD2|YWHAZ|ARHGAP44|YWHAQ|NUP62|CADM1|PTPN22|FOXP1|HTRA2|GTSE1|TM7SF3|LGR4|FERMT1|PANX2|RHBDF2|NLRP3	-0.999302	0	106	0	0	-2.4549	1.83168
1	-2.44904	GO:0051346	M1	1	0	GO Biological Processes	19	negative regulation of hydrolase activity	-2.44904	1.88802	3.09993	24155	466	604	22	3.64238	0.762285	274|332|636|960|3082|4171|5054|5055|5329|5743|5918|7980|9088|9232|9353|10253|56925|57709|63898|83596|154796|327657	BIN1|BIRC5|BICD1|CD44|HGF|MCM2|SERPINE1|SERPINB2|PLAUR|PTGS2|RARRES1|TFPI2|PKMYT1|PTTG1|SLIT2|SPRY2|LXN|SLC7A14|SH2D4A|BCL2L12|AMOT|SERPINA9	-1.07351	0	107	1	1	-2.44904	2.23954
1	-2.36097	GO:0010951	M1	1	0	GO Biological Processes	19	negative regulation of endopeptidase activity	-2.36097	2.23954	3.15496	24155	250	604	14	2.31788	0.612258	274|332|960|3082|5054|5055|5329|5743|5918|7980|9232|56925|83596|327657	BIN1|BIRC5|CD44|HGF|SERPINE1|SERPINB2|PLAUR|PTGS2|RARRES1|TFPI2|PTTG1|LXN|BCL2L12|SERPINA9	-1.00721	0	107	0	0	-2.44904	2.23954
1	-2.18537	GO:0010466	M1	1	0	GO Biological Processes	19	negative regulation of peptidase activity	-2.18537	2.13696	2.96326	24155	262	604	14	2.31788	0.612258	274|332|960|3082|5054|5055|5329|5743|5918|7980|9232|56925|83596|327657	BIN1|BIRC5|CD44|HGF|SERPINE1|SERPINB2|PLAUR|PTGS2|RARRES1|TFPI2|PTTG1|LXN|BCL2L12|SERPINA9	-0.874002	0	107	0	0	-2.44904	2.23954
1	-2.44163	M19	M1	1	0	Canonical Pathways	11	PID P73PATHWAY	-2.44163	3.54357	3.62638	24155	79	604	7	1.15894	0.435493	174|274|699|891|5054|7846|9184	AFP|BIN1|BUB1|CCNB1|SERPINE1|TUBA1A|BUB3	-1.06808	0	108	1	1	-2.44163	3.54357
1	-2.42756	GO:0031954	M1	1	0	GO Biological Processes	19	positive regulation of protein autophosphorylation	-2.42756	6.15257	4.20968	24155	26	604	4	0.662252	0.330028	805|10457|26585|56034	CALM2|GPNMB|GREM1|PDGFC	-1.05986	0	109	1	1	-2.42756	6.15257
1	-2.20727	GO:0031952	M1	1	0	GO Biological Processes	19	regulation of protein autophosphorylation	-2.20727	4.25444	3.57645	24155	47	604	5	0.827815	0.368674	805|2022|10457|26585|56034	CALM2|ENG|GPNMB|GREM1|PDGFC	-0.891033	0	109	0	0	-2.42756	6.15257
1	-2.42704	hsa05206	M1	1	0	KEGG Pathway	24	MicroRNAs in cancer	-2.42704	2.14003	3.17658	24155	299	604	16	2.64901	0.653421	672|960|993|994|1786|1956|2146|3925|4325|5578|5743|8091|9493|10253|10298|27086	BRCA1|CD44|CDC25A|CDC25B|DNMT1|EGFR|EZH2|STMN1|MMP16|PRKCA|PTGS2|HMGA2|KIF23|SPRY2|PAK4|FOXP1	-1.05986	0	110	1	1	-2.42704	2.14003
1	-2.36648	M33	M1	1	0	Canonical Pathways	11	PID GLYPICAN 1PATHWAY	-2.36648	5.9247	4.10024	24155	27	604	4	0.662252	0.330028	2247|3084|9353|284217	FGF2|NRG1|SLIT2|LAMA1	-1.01083	0	111	1	1	-2.36648	5.9247
1	-2.29398	M195	M1	1	0	Canonical Pathways	11	PID CMYB PATHWAY	-2.29398	3.33264	3.42965	24155	84	604	7	1.15894	0.435493	891|1436|3015|4173|4602|5743|8379	CCNB1|CSF1R|H2AZ1|MCM4|MYB|PTGS2|MAD1L1	-0.954621	0	112	1	1	-2.29398	3.33264
1	-2.25216	GO:0120033	M1	1	0	GO Biological Processes	19	negative regulation of plasma membrane bounded cell projection assembly	-2.25216	5.5161	3.89698	24155	29	604	4	0.662252	0.330028	9353|9738|9912|84260	SLIT2|CCP110|ARHGAP44|TCHP	-0.923175	0	113	1	1	-2.25216	5.5161
1	-2.25216	GO:0050855	M1	1	0	GO Biological Processes	19	regulation of B cell receptor signaling pathway	-2.25216	5.5161	3.89698	24155	29	604	4	0.662252	0.330028	865|9404|26191|27086	CBFB|LPXN|PTPN22|FOXP1	-0.923175	0	114	1	1	-2.25216	5.5161
1	-2.24781	GO:0050854	M1	1	0	GO Biological Processes	19	regulation of antigen receptor-mediated signaling pathway	-2.24781	3.69154	3.47975	24155	65	604	6	0.993377	0.403525	865|3783|8915|9404|26191|27086	CBFB|KCNN4|BCL10|LPXN|PTPN22|FOXP1	-0.921632	0	114	0	0	-2.25216	5.5161
1	-2.23735	GO:0008285	M1	1	0	GO Biological Processes	19	negative regulation of cell proliferation	-2.23735	1.62696	2.81632	24155	762	604	31	5.13245	0.897848	1033|1436|3159|3516|3569|3776|3976|4000|5467|5743|5744|5784|5918|6664|7027|8061|8200|8379|9289|10253|10457|11040|23240|23636|26585|51083|55612|80380|84678|144455|201163	CDKN3|CSF1R|HMGA1|RBPJ|IL6|KCNK2|LIF|LMNA|PPARD|PTGS2|PTHLH|PTPN14|RARRES1|SOX11|TFDP1|FOSL1|GDF5|MAD1L1|ADGRG1|SPRY2|GPNMB|PIM2|TMEM131L|NUP62|GREM1|GAL|FERMT1|PDCD1LG2|KDM2B|E2F7|FLCN	-0.914561	0	115	1	1	-2.23735	1.62696
1	-2.21547	M255	M1	1	0	Canonical Pathways	11	PID HIF1 TFPATHWAY	-2.21547	3.63561	3.43362	24155	66	604	6	0.993377	0.403525	2022|4907|5054|5209|5315|8553	ENG|NT5E|SERPINE1|PFKFB3|PKM|BHLHE40	-0.894876	0	116	1	1	-2.21547	3.63561
1	-2.20316	GO:0045216	M1	1	0	GO Biological Processes	19	cell-cell junction organization	-2.20316	2.54724	3.11479	24155	157	604	10	1.65563	0.519204	865|1004|1436|2150|3987|5317|5578|5818|57493|201163	CBFB|CDH6|CSF1R|F2RL1|LIMS1|PKP1|PRKCA|NECTIN1|HEG1|FLCN	-0.88758	0	117	1	1	-2.20316	2.54724
1	-2.16371	GO:0034330	M1	1	0	GO Biological Processes	19	cell junction organization	-2.16371	2.06143	2.91725	24155	291	604	15	2.48344	0.63321	865|1004|1436|2150|3655|3673|3987|5317|5578|5817|5818|10982|23705|57493|201163	CBFB|CDH6|CSF1R|F2RL1|ITGA6|ITGA2|LIMS1|PKP1|PRKCA|PVR|NECTIN1|MAPRE2|CADM1|HEG1|FLCN	-0.860687	0	117	0	0	-2.20316	2.54724
1	-2.20171	GO:0001101	M1	1	0	GO Biological Processes	19	response to acid chemical	-2.20171	1.97634	2.92077	24155	344	604	17	2.81457	0.672958	231|891|1719|1786|1956|2731|3184|3673|4602|5111|5743|7298|7477|10458|27429|56034|64506	AKR1B1|CCNB1|DHFR|DNMT1|EGFR|GLDC|HNRNPD|ITGA2|MYB|PCNA|PTGS2|TYMS|WNT7B|BAIAP2|HTRA2|PDGFC|CPEB1	-0.887201	0	118	1	1	-2.20171	3.52868
1	-2.1527	GO:0071230	M1	1	0	GO Biological Processes	19	cellular response to amino acid stimulus	-2.1527	3.52868	3.34399	24155	68	604	6	0.993377	0.403525	1786|1956|3184|10458|56034|64506	DNMT1|EGFR|HNRNPD|BAIAP2|PDGFC|CPEB1	-0.851353	0	118	0	0	-2.20171	3.52868
1	-2.19854	R-HSA-8866652	M1	1	0	Reactome Gene Sets	6	Synthesis of active ubiquitin: roles of E1 and E2 enzymes	-2.19854	5.33223	3.8023	24155	30	604	4	0.662252	0.330028	7326|8078|10477|29089	UBE2G1|USP5|UBE2E3|UBE2T	-0.884889	0	119	1	1	-2.19854	5.33223
1	-2.17813	GO:0048565	M1	1	0	GO Biological Processes	19	digestive tract development	-2.17813	2.68601	3.13419	24155	134	604	9	1.49007	0.492974	891|1956|3655|6664|6932|7298|55366|56034|56913	CCNB1|EGFR|ITGA6|SOX11|TCF7|TYMS|LGR4|PDGFC|C1GALT1	-0.868766	0	120	1	1	-2.17813	2.68601
1	-2.16833	GO:0008038	M1	1	0	GO Biological Processes	19	neuron recognition	-2.16833	4.1658	3.51594	24155	48	604	5	0.827815	0.368674	2048|2596|7534|10371|50863	EPHB2|GAP43|YWHAZ|SEMA3A|NTM	-0.861523	0	121	1	1	-2.16833	4.1658
1	-2.16538	GO:0048012	M1	1	0	GO Biological Processes	19	hepatocyte growth factor receptor signaling pathway	-2.16538	7.49845	4.16407	24155	16	604	3	0.496689	0.28605	3082|3925|11082	HGF|STMN1|ESM1	-0.861523	0	122	1	1	-2.16538	7.49845
1	-2.16538	R-HSA-1660516	M1	1	0	Reactome Gene Sets	6	Synthesis of PIPs at the early endosome membrane	-2.16538	7.49845	4.16407	24155	16	604	3	0.496689	0.28605	8821|55300|55361	INPP4B|PI4K2B|PI4K2A	-0.861523	0	123	1	1	-2.16538	7.49845
1	-2.14706	GO:0050685	M1	1	0	GO Biological Processes	19	positive regulation of mRNA processing	-2.14706	5.16022	3.71177	24155	31	604	4	0.662252	0.330028	891|10262|26528|64506	CCNB1|SF3B4|DAZAP1|CPEB1	-0.848638	0	124	1	1	-2.14706	5.16022
1	-2.13041	GO:0051445	M1	1	0	GO Biological Processes	19	regulation of meiotic cell cycle	-2.13041	4.08079	3.45705	24155	49	604	5	0.827815	0.368674	993|994|2827|3976|9319	CDC25A|CDC25B|GPR3|LIF|TRIP13	-0.836945	0	125	1	1	-2.13041	4.08079
1	-2.10632	hsa03015	M1	1	0	KEGG Pathway	24	mRNA surveillance pathway	-2.10632	3.07629	3.17784	24155	91	604	7	1.15894	0.435493	1479|5515|10250|26528|28227|29107|55339	CSTF3|PPP2CA|SRRM1|DAZAP1|PPP2R3B|NXT1|WDR33	-0.814906	0	126	1	1	-2.10632	3.07629
1	-2.08911	GO:0034501	M1	1	0	GO Biological Processes	19	protein localization to kinetochore	-2.08911	7.05736	4.00097	24155	17	604	3	0.496689	0.28605	9184|54908|83903	BUB3|SPDL1|HASPIN	-0.803783	0	127	1	1	-2.08911	7.05736
1	-2.01796	GO:0036035	M1	1	0	GO Biological Processes	19	osteoclast development	-2.01796	6.66529	3.85057	24155	18	604	3	0.496689	0.28605	27086|56975|284266	FOXP1|FAM20C|SIGLEC15	-0.746526	0	128	1	1	-2.01796	6.66529
1	-2.01796	GO:0006595	M1	1	0	GO Biological Processes	19	polyamine metabolic process	-2.01796	6.66529	3.85057	24155	18	604	3	0.496689	0.28605	1725|6611|113451	DHPS|SMS|AZIN2	-0.746526	0	129	1	1	-2.01796	6.66529
1	-2.00603	R-HSA-5654738	M1	1	0	Reactome Gene Sets	6	Signaling by FGFR2	-2.00603	3.28699	3.13392	24155	73	604	6	0.993377	0.403525	2247|2963|3178|4670|5515|10253	FGF2|GTF2F2|HNRNPA1|HNRNPM|PPP2CA|SPRY2	-0.737064	0	130	1	1	-2.00603	3.28699
1	-2.00411	M210	M1	1	0	Canonical Pathways	11	PID IL8 CXCR2 PATHWAY	-2.00411	4.70491	3.462	24155	34	604	4	0.662252	0.330028	1794|5515|5578|5880	DOCK2|PPP2CA|PRKCA|RAC2	-0.736566	0	131	1	1	-2.00411	4.70491
