# Supplementary material for: Weighted gene correlation network analysis reveals novel biomarkers associated with mesenchymal stromal cell differentiation in early phase
Source: PeerJ. 2020 Apr 3;8:e8907. doi: 10.7717/peerj.8907 (PMC7134052; doi:10.7717/peerj.8907)
Supplement: Supplemental Information 2 — The gene symbol of 157 upregulated DEGs and 40 downregulated DEGs are ordered by their log2FC and p-values. DGEs: differentially expressed genes. [file peerj-08-8907-s002.xlsx]

## Sheet: DEGs
symbol	logFC	AveExpr	t	P.Value	adj.P.Val	B
KLF2	-2.87363	10.1399	-38.8377	6.44e-09	1.58e-05	10.8143
IER3	-2.37742	10.3228	-18.9819	8.07e-07	0.000377014	6.70877
CCL2	-1.97727	9.77509	-18.773	6.86e-07	0.000216961	6.93933
KRTAP1-5	-1.96454	9.32598	-44.5772	2.65e-09	1.03e-05	11.3593
ENC1	-1.82676	9.4804	-10.9667	2.02e-05	0.00214316	3.44141
SERTAD2	-1.67916	10.8033	-22.8912	1.93e-07	7.73e-05	8.13396
HMOX1	-1.5401	10.1503	-12.7859	9.3e-06	0.00191974	4.36878
RGMB	-1.52325	9.03909	-13.2727	6.16e-06	0.00097346	4.70866
RGS4	-1.45377	11.8249	-9.38623	6.03e-05	0.00729923	2.42036
KRTAP1-3	-1.43767	7.94441	-11.6277	1.41e-05	0.00178055	3.83127
ADAMTS1	-1.39864	11.0447	-14.3502	4.58e-06	0.00125996	5.07737
ID2	-1.35769	10.4023	-18.1644	6.13e-07	0.000231195	6.99712
MIDN	-1.35475	8.96544	-10.0075	3.55e-05	0.00306864	2.8314
NGF	-1.31881	9.22373	-15.1641	2.66e-06	0.000549075	5.58121
EBF3	-1.31834	9.42752	-13.7626	4.9e-06	0.00105556	4.98996
HOXA5	-1.26675	9.6438	-15.4493	1.77e-06	0.000462623	5.97513
NABP1	-1.22721	9.67773	-8.48787	9.65e-05	0.00618562	1.73863
JUN	-1.22027	9.44014	-9.50664	6.07e-05	0.0201754	2.53216
BCL3	-1.19272	8.60505	-18.4154	5.6e-07	0.000219718	7.0816
ARHGEF2	-1.1893	9.77295	-11.5926	1.43e-05	0.00178055	3.81118
DDIT3	-1.1672	7.92735	-21.6102	2.79e-07	0.000107357	7.7953
UGCG	-1.16353	10.3401	-14.7857	3.12e-06	0.000815179	5.43902
ADM	-1.12687	10.9552	-25.1583	1.39e-07	0.000186372	8.16968
HJURP	-1.11155	8.5749	-22.7426	2.61e-07	0.000228178	7.6716
CITED2	-1.11011	10.8474	-6.22007	0.000648696	0.0370702	-0.155845
IRF1	-1.1092	7.6341	-11.3197	1.66e-05	0.00194421	3.65252
SLC2A3	-1.10783	9.54231	-9.46877	4.98e-05	0.00493054	2.58041
HOXA9	-1.10742	8.1106	-31.7144	1.54e-08	2.74e-05	10.0383
STC2	-1.10439	12.4266	-25.396	9.92e-08	5.11e-05	8.72495
PPP1R15A	-1.09194	9.76879	-9.76547	4.13e-05	0.00351821	2.66838
OSR1	-1.08421	7.68584	-14.2241	3.98e-06	0.00073692	5.16385
BTG1	-1.05385	11.0539	-11.0031	1.98e-05	0.00265869	3.55636
MAT2A	-1.04286	11.4659	-16.1989	1.75e-06	0.000404098	6.00738
HOXB2	-1.04233	8.42375	-7.96431	0.000158798	0.0144816	1.37921
CDKN1B	-1.02581	8.02882	-25.9863	5.77e-08	5.18e-05	9.05606
BDKRB1	-1.01162	8.25706	-14.1555	4.11e-06	0.000746823	5.13219
C5orf30	-1.00955	8.84532	-22.994	2.44e-07	0.000227352	7.72731
SERTAD4	-1.008	7.95471	-8.23706	0.000115541	0.00688575	1.54106
CDCA8	-1.00751	8.63171	-19.9739	5.87e-07	0.000325369	6.98858
TXNIP	-1.00132	8.9487	-8.35719	0.000128921	0.0337034	1.79829
SERPINE1	1.00184	13.5787	6.8867	0.000288029	0.0198154	0.605788
FSTL3	1.003	9.56855	6.98586	0.000305047	0.0164566	0.619786
EMP1	1.00644	12.4733	13.7729	3.74e-06	0.000813753	5.22721
CHST3	1.00942	9.50494	8.11588	0.000126232	0.00732257	1.44367
NEXN	1.01431	9.91978	12.4012	9.41e-06	0.00164755	4.32751
TMEM100	1.01452	7.80813	7.90371	0.000147787	0.00792206	1.27002
STC1	1.01518	8.44642	7.07914	0.000313243	0.0225463	0.640507
SMIM3	1.01966	9.12179	6.0136	0.000717998	0.0226331	-0.477649
TNFAIP3	1.0197	9.93556	11.1463	2.36e-05	0.0110171	3.41346
CRYAB	1.02116	11.8279	19.9205	5.97e-07	0.000325369	6.97402
NEDD9	1.02273	7.87316	24.9409	1.11e-07	5.33e-05	8.62398
SAMD4A	1.02452	8.15523	7.43801	0.000211569	0.0101922	0.874205
ZNF189	1.0332	8.18049	26.3758	5.23e-08	5.12e-05	9.13395
ID1	1.0333	9.70758	13.9315	5.49e-06	0.00139906	4.89711
FAM46B	1.03374	8.85156	16.5849	1.11e-06	0.000325786	6.42819
SMAD7	1.03596	9.27419	7.08841	0.000310913	0.0224948	0.64865
ZC3H12A	1.0391	7.88524	9.75372	4.8e-05	0.00606579	2.66431
CLCF1	1.04218	9.30479	19.5098	5.37e-07	0.000181437	7.17709
F3	1.04277	7.29858	12.5662	5.95e-06	0.00284442	4.67017
RAMP1	1.0455	7.58719	8.11146	0.000126579	0.00943665	1.57655
FAM167A	1.04695	8.02939	7.21987	0.000279914	0.0211088	0.763185
RHOB	1.04789	9.68502	5.38062	0.00132643	0.0346965	-1.1569
MIR503HG	1.04994	7.92127	19.2617	5.82e-07	0.000193534	7.09834
ELF1	1.05093	9.77367	17.2958	1.15e-06	0.00043541	6.3945
HSPB7	1.05267	9.0023	5.49763	0.00117979	0.0320835	-1.02733
HIVEP3	1.0595	7.5942	16.7475	1.42e-06	0.000365889	6.22047
SRSF5	1.05978	10.1966	7.48949	0.000160865	0.0350454	1.49041
TCF7L2	1.06107	7.92963	9.01567	6.71e-05	0.00474432	2.13759
GFPT2	1.06176	9.11519	14.32	4.64e-06	0.00125996	5.06456
SOX9	1.06343	8.74484	13.5039	6.65e-06	0.00156887	4.70612
DCUN1D3	1.06765	9.7545	6.81233	0.000353023	0.0144202	0.30824
FHL3	1.07178	10.1193	10.465	2.7e-05	0.00318661	3.231
SLC7A5	1.07734	10.7231	7.11472	0.000274401	0.0120903	0.58688
KLF4	1.07843	8.20389	9.57856	5.81e-05	0.0199761	2.57463
BCL6	1.08235	10.2036	17.4651	7.93e-07	0.000272903	6.7534
CDR2L	1.08401	11.0591	12.5791	8.62e-06	0.00125135	4.35371
MT1M	1.08646	8.40392	10.7118	2.73e-05	0.00393585	3.25846
ID3	1.08796	12.9245	9.03692	8.18e-05	0.0246605	2.24516
KBTBD11	1.09562	8.58479	25.7843	6.07e-08	5.18e-05	9.01494
ATG101	1.09986	10.5701	11.6212	1.41e-05	0.00178055	3.82755
VGLL4	1.10046	10.1242	8.30196	0.000110187	0.00843918	1.72661
EGR2	1.10062	7.58805	19.4766	2.77e-07	0.000906891	6.15459
LIF	1.10736	7.71433	19.6116	3.7e-07	0.000177124	7.46416
SOWAHC	1.1081	9.88546	14.2586	4.76e-06	0.00126148	5.03845
SPRY2	1.11892	9.70625	8.62381	0.00010743	0.0300912	1.97824
FKBP5	1.12403	8.01695	7.07644	0.000313925	0.0225463	0.638132
ZFP36L1	1.12635	8.4846	7.97415	0.00015766	0.014445	1.387
ZCCHC14	1.12791	9.27414	15.3149	2.5e-06	0.000532126	5.64536
S1PR3	1.12961	8.18593	23.7644	1.52e-07	6.62e-05	8.35005
LMCD1	1.12969	10.3228	15.1835	2.64e-06	0.000760296	5.60353
KLF13	1.1361	10.0438	13.8028	4.81e-06	0.000806702	4.96661
FLVCR2	1.13984	7.7484	22.0662	3.15e-07	0.000247166	7.51682
GFOD1	1.14426	8.03601	33.8582	1.56e-08	5.09e-05	9.80344
SERTAD1	1.147	10.6414	7.78059	0.000138057	0.0118723	1.40767
TSC22D1	1.15765	8.95263	13.112	7.97e-06	0.00175609	4.52469
ZNF281	1.15911	9.59592	9.03987	4.97e-05	0.014552	2.67029
HBEGF	1.16289	9.09578	7.77097	0.000196036	0.049278	1.37986
SAP30	1.16572	9.75078	5.08552	0.00179646	0.0426129	-1.49212
BAG3	1.16638	11.0844	13.8794	4.65e-06	0.00079961	5.00297
ZNF503	1.17562	10.0928	8.52519	9.4e-05	0.00604452	1.76757
CAMK2N1	1.17801	8.88831	18.1662	6.13e-07	0.000231195	6.99773
ITGA5	1.17881	11.7945	7.63729	0.000180974	0.0116104	1.18868
PRICKLE2	1.18637	8.89374	25.8191	8.92e-08	5.09e-05	8.81647
TSC22D3	1.18673	8.11223	27.3855	9.62e-08	0.000314485	7.21927
JARID2	1.18975	8.79249	15.1656	3.25e-06	0.00105135	5.41049
NR4A1	1.19073	7.4258	14.405	4.47e-06	0.00125996	5.10047
APOLD1	1.19608	8.01606	8.73452	9.24e-05	0.00994076	1.96342
TNFAIP8L3	1.19855	8.08128	25.2519	1.03e-07	5.11e-05	8.69326
INHBB	1.20038	8.26795	25.7923	1.18e-07	0.000178717	8.28765
PTPN1	1.20251	10.518	12.9841	8.46e-06	0.00180406	4.46408
KLF6	1.21384	11.8273	9.63062	5.62e-05	0.0196933	2.60514
ANKRD1	1.21413	10.2416	8.99729	5.64e-05	0.00673757	2.37768
EXOG	1.21577	10.8745	12.6209	8.43e-06	0.00157471	4.4399
PPTC7	1.21583	8.48467	23.8044	1.5e-07	6.62e-05	8.35969
ADRA1B	1.21634	7.58627	31.1016	2.69e-08	6.6e-05	9.45131
DKK1	1.21781	10.5536	5.86506	0.000825387	0.0307521	-0.46984
PTGER2	1.21974	8.52054	32.9442	1.86e-08	2.52e-05	10.0743
EVA1C	1.2287	8.82575	14.7477	3.17e-06	0.00061576	5.40007
ST3GAL1	1.23807	8.28339	19.3254	7.22e-07	0.000362918	6.80799
ZNF331	1.25233	7.87268	22.8522	2.95e-07	0.000426806	6.65954
PTGS2	1.25769	8.41816	8.89862	8.95e-05	0.0265795	2.15737
AVPI1	1.26121	11.9734	11.6858	1.36e-05	0.00175922	3.86447
BHLHE40	1.26147	11.0355	18.2533	1.03e-06	0.000448897	6.4897
SLC46A3	1.26452	8.7838	17.628	1.02e-06	0.000416428	6.5075
MT1E	1.26621	9.92467	24.2806	9.04e-08	7.23e-05	8.69204
TOB1	1.27443	9.86815	8.98495	7.82e-05	0.00891252	2.14283
AUTS2	1.28415	10.1084	11.314	1.67e-05	0.00194421	3.6492
ELL2	1.28729	9.86471	15.4314	2.92e-06	0.00104177	5.51428
SNCAIP	1.29746	7.89247	16.1686	1.77e-06	0.000550156	5.98883
CYR61	1.2982	12.9764	13.2492	4.2e-06	0.00235504	4.97544
TIPARP	1.30217	11.3473	8.19796	0.000144101	0.0371761	1.68779
SNAI2	1.30902	11.1744	12.1851	1.38e-05	0.00752783	3.88938
PTX3	1.3212	9.37859	5.8035	0.000875257	0.0320171	-0.534171
XIRP1	1.32913	7.39765	18.6352	5.18e-07	0.000211706	7.15435
RGCC	1.33449	8.11106	10.4674	3.43e-05	0.0140243	3.06964
DDIT4	1.35138	10.2978	23.4393	2.52e-07	0.000412119	6.74477
NFIL3	1.35342	8.6354	14.423	4.44e-06	0.00125996	5.10801
EIF2AK3	1.36267	7.83347	15.3036	2.51e-06	0.000532126	5.64058
SGK1	1.3644	9.52349	18.511	1.08e-06	0.00117794	5.8667
CEBPB	1.37332	12.6918	13.3232	8.06e-06	0.00478815	4.35003
BMP6	1.37446	8.27824	10.9344	2.06e-05	0.00216245	3.42175
CEBPD	1.38157	11.8744	9.70204	5.38e-05	0.0191958	2.64667
ABTB2	1.39035	7.79613	14.8857	2.99e-06	0.000598373	5.46074
CXCL8	1.39339	8.13927	18.5664	3.83e-07	0.00107357	5.99188
IRS2	1.39457	8.73105	24.7487	1.8e-07	0.000385355	6.91995
FADS1	1.39965	9.69925	18.4204	7.74e-07	0.000233516	6.82133
GADD45A	1.40214	10.5993	15.5062	1.49e-06	0.00100663	5.84404
FOXQ1	1.40629	9.11351	11.7701	1.7e-05	0.00855928	3.7061
SUSD6	1.411	9.10605	28.137	5.14e-08	3.73e-05	9.28053
SEC14L2	1.41237	7.83765	23.46	1.65e-07	0.000179562	8.10554
PMAIP1	1.42701	7.6869	11.3587	1.15e-05	0.00479369	4.0726
ANGPTL4	1.43117	8.60099	19.9995	5.83e-07	0.000325369	6.99552
ERRFI1	1.43426	12.2921	9.95319	4.63e-05	0.0177987	2.78985
MCL1	1.44191	9.73662	15.1934	3.22e-06	0.00105135	5.42144
BTG2	1.44359	8.33824	19.9472	6.83e-07	0.000836693	6.16507
JUNB	1.4523	8.60752	24.0308	2.16e-07	0.000385355	6.82635
TRIB1	1.45514	9.35117	7.73667	0.000201068	0.0492791	1.35435
B3GNT2	1.45683	8.43345	13.7985	5.83e-06	0.00140261	4.83845
LONRF1	1.45786	8.26691	14.1519	4.11e-06	0.000746823	5.13052
KLHL26	1.45981	8.00863	17.7963	9.64e-07	0.000270033	6.60535
WISP1	1.46199	8.59632	20.6842	3.69e-07	0.000202377	7.42639
FOXO1	1.46804	8.20442	13.4815	6.72e-06	0.00156887	4.69591
ETS1	1.47466	10.5389	15.0469	2.1e-06	0.000528345	5.80471
MT1G	1.49007	8.67195	14.3427	3.78e-06	0.000881794	5.24931
DLX5	1.49786	10.0031	18.7173	8.81e-07	0.000401775	6.63059
SOCS2	1.56319	8.59323	28.4439	4.79e-08	3.63e-05	9.33758
ITPRIP	1.56713	11.0089	21.9132	3.29e-07	0.000248241	7.48078
PGM2L1	1.57954	8.73784	11.5506	1.47e-05	0.00180795	3.78699
CHST7	1.59059	9.72559	35.8407	1.08e-08	1.87e-05	10.465
SOCS1	1.60524	7.88966	22.496	2.79e-07	0.000228178	7.616
PPP1R3C	1.67332	12.2313	16.4129	1.61e-06	0.000381186	6.09151
DUSP2	1.68074	7.90716	17.6644	7.36e-07	0.000262543	6.82412
EGR1	1.70664	11.0968	11.7539	1.58e-05	0.0207144	3.37273
GADD45B	1.71893	9.34659	13.8467	6.38e-06	0.00403448	4.5432
CHMP1B	1.73794	11.5692	18.9791	9.27e-07	0.00106966	5.96848
IL6	1.7624	11.206	26.2568	1.25e-07	0.000349903	7.09905
PDK4	1.76532	7.82253	12.3192	1.17e-05	0.00215986	4.13744
C10orf10	1.80621	8.8456	11.5182	1.76e-05	0.00289775	3.71634
DUSP5	1.83177	9.77485	28.2218	6.96e-08	0.000454595	5.96039
ZFAND5	1.84364	12.9265	13.9189	5.52e-06	0.00139906	4.89157
MEDAG	1.84843	10.3579	13.4342	6.87e-06	0.00158425	4.6743
CRISPLD2	1.93304	11.4221	18.6474	9.02e-07	0.000401904	6.60969
PDE4D	1.94599	8.77951	23.3064	2.24e-07	0.000224368	7.79522
MT1X	1.96614	11.4542	13.9053	5.56e-06	0.00139906	4.88559
SIK1	1.99568	7.91313	16.0578	2.59e-06	0.00217595	5.24948
KLF9	2.07708	11.7525	21.0257	4.26e-07	0.000278641	7.26395
NR4A2	2.15837	8.20157	26.2446	1.1e-07	0.000479783	5.83463
GAS1	2.17511	10.185	20.2632	5.37e-07	0.000325369	7.06643
CSRNP1	2.20296	10.3898	14.8471	4.17e-06	0.0028214	4.88321
RASD1	2.25164	10.8138	20.6886	4.85e-07	0.00158482	5.31939
DUSP1	2.41298	12.656	18.3803	1.01e-06	0.00283649	4.99823
HAS1	2.52094	9.59581	14.6305	4.06e-06	0.00124444	5.19445
NFKBIA	2.56173	10.8624	22.7329	3.05e-07	0.000426806	6.64168
ZFP36	2.66844	11.2131	15.5726	3.12e-06	0.00235216	5.10821
FOSB	3.34455	8.86162	37.3706	1.19e-08	0.000116893	6.33191
RGS2	3.73462	9.87728	25.7897	1.22e-07	0.000479783	5.80228
FOS	5.50199	10.0485	53.7981	1.2e-09	2.36e-05	6.61251
