# Supplementary material for: Weighted gene correlation network analysis reveals novel biomarkers associated with mesenchymal stromal cell differentiation in early phase
Source: PeerJ. 2020 Apr 3;8:e8907. doi: 10.7717/peerj.8907 (PMC7134052; doi:10.7717/peerj.8907)
Supplement: Supplemental Information 3 — Only 24 genes were obtained with MM > 0.85 and GS > 0.85. MM: module membership, GS: gene significance. [file peerj-08-8907-s003.xlsx]

## Sheet: Sheet1
SHISA2
NRG1
GPR68
ESM1
ITGA2
CDCP1
KRT34
CEP41
GTF2F2
GLDC
F2RL1
ADGRG1
LPXN
TNIK
TM4SF4
SERPINB2
PRKCA
LYPD1
FAM20C
NCEH1
MALL
CCDC34
RBPJ
KRT19
